# Supplementary material
Source: Research Square preprint supplement (doi:10.21203/rs.3.rs-9166480/v1)
Supplement: Supplementary file 1 [file 256b5f926e4dc5fede9e0c43.docx]

**The enhanced multi-tissue atlas of regulatory effects in cattle**

The supplementary information contains:

**Supplementary Notes**

**Supplementary Figures 1–22**

**Supplementary References**

**Supplementary Tables 1–20** (in a separate Excel file)

**Supplementary Notes**

**Data collection and quality control**

We downloaded RNA-seq data from two major public repositories by September 2024 (**Supplementary Table** 1): the NCBI Sequence Read Archive (SRA, https://www.ncbi.nlm.nih.gov/sra), which is the largest sequencing data repository worldwide, and the Genome Sequence Archive (GSA), maintained by the National Genomics Data Center (https://ngdc.cncb.ac.cn/gsa). We searched both databases using the attributes ‘RNA-seq’ and organism ‘cattle’, and retrieved all available metadata associated with the datasets. We then manually curated the run-level metadata, resulting in a total of 37,139 runs. Aspera was used in downloading all public data1. Except public data, we also sequenced 1,268 new RNA-seq data. Briefly, 533 Chinese Holstein cattle were fattening bulls, approximately 2 years of age, with similar weights, and originated from large‐scale ranches in Ningxia, China. All cattle were healthy and fasted for 1 day in the isolation house before slaughtering. Samples from three tissues, including 514 samples in lung, 459 samples in rumen and 295 samples in lymph node, were collected within 1 h after slaughter. All samples were immediately dipped in liquid nitrogen and then transferred into −80°C freezer until use. Furthermore, total RNA was extracted from 1,268 samples using TRIzol reagent (Invitrogen) according to the manufacturer's instructions. Due to the degradation of RNA in some samples, a total of 1,268 high‐quality RNA samples from the three tissues were used to construct sequencing libraries. After library quality control, the libraries were sequenced using DNBSEQ‐T7 platform (BGI), and 150 bp paired‐end reads were generated.

After obtaining the public data with 1,268 newly sequenced data, we merged the files according to the biosamples they belonged to by concatenating them, treating each biosample as a unit for analysis. This resulted in a total of 27,682 RNA-seq samples. We then downloaded the metadata for all biosamples and manually curated it (**Supplementary Table** 2). For entries with missing tissue type information, we supplemented the data using run-level information or, when available, details reported in the associated publications. Metadata on breed, sex, sequencing platform and model, among other attributes, were collected, although many entries were missing. Finally, we performed a biologically informed consolidation of the metadata and applied corrections where necessary. Among all the samples, despite a large number of missing records (n = 12,513), females (n = 9,108) outnumber males (n = 5,994). Bos taurus leads among all breeds (n = 25,678), followed by Bos indicus (n = 886), which was much less represented. Regarding sequencing platforms, Illumina dominates (n = 27,304). Paired-end data (n = 21,287) were far more abundant than single-end data (n = 6,394). Among all tissues, samples from the immune system (e.g., blood, n = 4,019) constitute the majority of public RNA-seq datasets. Additionally, samples from the female reproductive system (e.g., uterus, n = 1,424) and mammary gland (n = 3,370) were abundant, likely due to their relevance to economically important traits like reproduction and milk production. Similarly, muscle samples (n = 2,391) were well represented. The liver, a crucial organ for metabolism, has a substantial sample size (n = 1,817). In contrast, some tissues such as heart (n = 124), spleen (n = 119), and adipose (n = 138) are less frequently sampled, despite their important biological functions (**Supplementary Fig**. 4). These indicated that more data from underrepresented tissues and breeds (e.g., Bos indicus) are still required in the future development of CattleGTEx.

**Decomposition of gene expression variance**

We computed the coefficient of variation (CV) of transcripts per million (TPM) values for each gene, and stratified genes based on log-transformed CV into the top 2,000 most and least variable genes, respectively. Gene Ontology (GO) enrichment analysis, performed with the *enrichGO* function from clusterProfiler (v4.8.3)2 using the org.Hs.eg.db (v3.16.0) database, revealed that highly variable genes were enriched for tissue-specific functions, while genes with low variability were associated with fundamental cellular processes (**Supplementary Fig.** 5c).

**Tissue-specificity of gene expression**

We assessed tissue-specific gene expressions across 43 tissues, each containing at least 40 RNA-seq samples. Tissue specificity was quantified using the TAU value, implemented in the tspex package (v0.6.3)3. Differential expression analysis was performed by comparing each tissue to all others using the Wilcoxon rank-sum test4, based on trimmed mean of M value (TMM)-normalized expression values. Highly expressed genes were classified as tissue-specific if they met the following criteria: FDR corrected *P*-value < 0.05 and Log2FoldChange > 2 relative to all other tissues. Functional enrichment analysis of tissue-specific genes was conducted within tissue for Gene Ontology (GO) and Biological Process (BP) terms using clusterProfiler (v4.8.3)5.

**RNA-seq sample clustering and correction**

We performed clustering analysis for all 12,422 RNA-seq samples based on seven molecular phenotypes using the *hclust* function in R (v4.3.0), with a distance matrix of (1 − *r*), where *r* denotes the Pearson’s correlation coefficient6. Although the clustering based on gene expression largely recapitulated tissue specificity, a few samples were grouped with unrelated tissue types, likely due to differences in sampling procedures Meanwhile, several *in vitro* cultured cell samples, including Madin–Darby bovine kidney (MDBK) cells, fibroblasts, Madin–Darby bovine mammary gland epithelial (MAC-T) cells, stem cells, and other cell lines, formed a distinct cluster. This cluster was subsequently defined as a single specific group named “cell lines,” highlighting the distinct gene expression patterns between primary tissues and cell lines.

**Genotype imputation and evaluation**

Genotype phasing and imputation of variants from 19,789 RNA-seq samples were performed using GLIMPSE2 (v2.0.0)7, which showed the best performance for low-coverage genotype imputation, using a reference panel comprising 3,530 WGS samples from ~70 breeds worldwide8. Variants with IMPUTE info quality score (INFO) higher than 0.75 and minor allele frequency (MAF) higher than 0.05 were retained, resulting in a total of 4,093,826 high-confidence SNPs for subsequent analyses, such as molecular quantitative trait loci (molQTL) mapping. To assess the representativeness of the reference panel for RNA-seq–based imputation, we pruned imputed SNPs in high linkage disequilibrium (LD) using PLINK(v1.90b6)9, with the parameters --indep-pairwise 50 5 0.2, yielding 183,736 approximately LD-independent SNPs. Principal component analysis (PCA) of 3,530 WGS reference individuals and 19,789 RNA-seq samples showed highly concordant population structures, confirming the suitability of the reference panel for RNA-seq–based imputation (**Fig.** 1d).

To assess the accuracy of RNA-seq–based genotype imputation, we analyzed 99 independent blood RNA-seq samples, each with matched whole-genome sequencing (WGS, 30×) and RNA-seq data. Using the same imputation strategy, we obtained a total of 4,687,054 high-confidence SNPs. The mean concordance rate (CR) and *r*² between RNA-seq imputed and WGS-called SNPs across samples were 96.8% and 91.1%, respectively (**Supplementary Fig.** 2c). Imputation accuracy was broadly consistent across genomic features (**Supplementary Fig.** 2d-e).

**Sex and breed imputation**

Since our dataset originates from public domains contain 8,205 and 9,110 missing annotations for breeds and sex respectively, we applied computational methods to infer them. For sex annotation, a machine learning–based imputation framework was applied using gene expression profiles as predictive features. Multiple combinations of feature selection methods (Chi-squared test, ANOVA F-test, and SelectFromModel)10,11, classification algorithms (Logistic Regression, AdaBoost, Bagging, Decision Tree, Extra Trees, Gaussian Naive Bayes, Gradient Boosting, k-Nearest Neighbors, Multi-layer Perceptron, Random Forest, Support Vector Classifier, and Voting Classifier)12-23, and feature set sizes (30–2,000) were benchmarked. Performance was assessed by calculating cross-validation accuracy with 10-fold stratified cross validation repeated five times. Of them, SelectFromModel with Logistic Regression using 2,000 features had the highest overall cross-validation accuracy (0.991 ± 0.003, mean ± SD; **Supplementary Table.** 5) and was subsequently applied to impute missing sex annotations across all samples.

We also applied this machine learning–based framework for breed annotation benchmarking, which was similar to the sex imputation pipeline but using genotype data. RNA-seq samples and reference panel samples with known breeds (n ≥ 15, excluding crossbred samples) were combined, resulting in a total of 12,574 samples. Fixation index (FST) was calculated using GCTA (v1.94.1)24, and the resulting FST values were also used to compute the average Euclidean distance (AED) between SNPs. SNPs were further split into blocks of 5,000 and fitted to breed annotations per sample using a partial least squares regression (PLSR) model to obtain PLSR coefficients. These three metrics (FST, AED, and PLSR coefficients) were then used to select the most informative SNPs, rather than applying direct feature selection to all variants25,26. For model training and evaluation, 80% of the samples were used as a training set across multiple pipelines, and 20% were reserved as a leave-out test set. Accuracy was assessed both by 5-fold stratified cross-validation within the training set and on the leave-out samples. A linear support vector machine (Linear SVM) trained on the top 10,000 selected variants achieved the best performance with 10,000 selected variants (0.977 ± 0.004, mean ± SD; **Supplementary Table.** 6) and then was applied to impute missing breed annotations across all samples.

After metadata imputation, we obtained 19,790 high-quality RNA-seq samples with predicted and well-curated breed and sex metadata.

**Detection of duplicate RNA-seq samples within each tissue**

Within each tissue, duplicate samples were identified and removed using the same strategy as in previous FarmGTEx projects27-30. Briefly, for 18,518 RNA-seq samples with unknown individual identities, identity-by-state (IBS) distances were calculated using PLINK(v1.90b6)9 based on 4,093,826 high-confidence SNPs. Sample pairs with IBS ≥ 0.9 were flagged as potential duplicates, and for each duplicate pair, the replicate with the highest sequencing depth was retained. After filtering, 43 tissues with sufficient sample sizes (n ≥ 40) were retained for molQTL mapping, with sample sizes ranging from 41 (spleen) to 2,693 (immune system).

**Heritability estimation of seven molecular phenotypes**

To quantify the genetic contribution to variation in each molecular phenotype, we estimated *cis*-heritability (*h*2) per tissue using OmiGA (**Supplementary Fig.** 7), with parameter “--h2-model”31. Additive GRM was computed from *cis*-variants, and heritability was estimated using a linear mixed model with an average information-restricted maximum likelihood (AI-REML)32.

***cis*-eQTL validation**

Internal validation was performed for 28 tissues with more than 80 samples each. Within each tissue, samples were randomly divided into two equal subsets, and *cis*-eQTL mapping was performed independently in each subset using OmiGA31. The replication rates of *cis*-eQTL between subsets was assessed using Storey’s π1 statistic33, calculated with the qvalue package (v2.32.0)34, where π1 represents the proportion of *cis*-eQTL detected in one subset that were also significant in the other. Additionally, Pearson’s correlations of normalized effect sizes (Z-scores) were computed between the two subsets.

For ASE analysis, haplotypes were phased using phASER (v1.1.1)35 with the options --mapq 255 --baseq 10 --gw_phase_vcf 1 --pass_only 0, applied to alignments processed with WASP to correct for allelic mapping bias (see **Methods**). Gene-level haplotype counts were generated with phaser_gene_ae.py (v1.2.0) and aggregated across samples using phaser_expr_matrix.py (v0.1.0). ASE-based allelic fold change (aFC) was then calculated per tissue using phaser_cis_var.py (v0.1.0) for variants present in at least 10 individuals. In parallel, cis-eQTL aFC was estimated by using aFC.py (v0.3)36, based on genotypes, normalized molecular phenotypes and the same covariates used for cis-eQTL mapping. Confidance intervals were obtained from 100 boostrap resamples. Pearson’s correlations revealed strong concordance between ASE-derived and eQTL-derived aFC (**Extended Fig.** 9b).

To evaluate the difference in molQTL detection using RNA-seq–based and WGS genotypes, we used 99 RNA-seq samples with matched WGS data as described above. WGS genotypes were directly called, and RNA-seq genotypes were imputed using the same strategy applied for RNA-seq–based imputation. For each dataset, *cis*-eQTL mapping was performed with OmiGA, and results were compared between imputed RNA-seq genotypes and WGS-called genotypes (**Extended Fig.** 9d-m).

**molQTL mapping in 43 tissues with ACAT multiple test**

Beyond the recently published Clipper methods37, we also applied the widely used aggregated Cauchy association test (ACAT) for multiple testing correction38. ACAT is a general, powerful, and computationally efficient p-value combination approach that typically uses more relaxed significance thresholds, thereby increasing power in sequencing studies. Consequently, it can identify more molQTL in tissues with small sample sizes compared with Clipper. In contrast, Clipper improves the multiple testing workflow by reducing permutation requirements and achieving faster runtime with lower computational demands on large-scale datasets, making it more suitable for analyses with our sample sizes. The corrected p-values (q-values) of all tested SNPs were significantly correlated between ACAT and Clipper methods, ranging from 0.70 in 3’aQTL to 0.79 in enQTL (**Supplementary Fig.** 8a-b). There were specific molQTL identified by each method. For example, Clipper multiple testing method identified an average of 458 additional tissue-molGene pairs in eQTL (ranging from 12 in Granulosa to 2,838 in Gut), 135 in enQTL (ranging from 2 in Skin to 775 in Gut), 275 in stQTL (ranging from 19 in Skin to 3,322 in Gut) and 113 in 3’aQTL (ranging from 7 in Macrophage to 253 in Hypothalamus), whereas ACAT method captured an average of 2,332 additional molGenes in eeQTL (269 in Colon to 4,259 in Epididymis), 514 in isoQTL (1 in Spleen to 1,326 in Epididymis) and 1,204 in sQTL(126 in Macrophage to 3,032 in Testis; **Supplementary Fig.** 8c**)**. Results of molQTL mapping based on ACAT multiple testing were uploaded to our CattlePhase1 website (<https://cattlegtex.farmgtex.org/>).

**Joint tissue eQTL mapping**

To improve the detection of subtle regulatory effects on gene expression, we aggregated samples across all tissues and removed duplicate samples with an IBS greater than 0.9, retaining the sample with the higher number of mapped reads in each pair. This resulted in a total of 8,743 unique samples. We then performed cis molQTL mapping following the same procedure as in the single-tissue analysis (See **Methods**), with tissue type included as an additional covariate to account for cross-tissue variation. Conditional eQTL mapping and fine-mapping were also conducted to identify independent and putatively causal regulatory variants as in the single-tissue analysis (See **Methods**). Results of joint tissue eQTL mapping were uploaded to our CattlePhase1 website (<https://cattlegtex.farmgtex.org/>).

**TWAS and SMR of complex traits**

We conducted a transcriptome-wide association study (TWAS) with S-PrediXcan39 function, implemented in the MetaXcan40 (v.0.6.11) family. In brief, we trained the nested cross-validated elastic net models with gene expression and corresponding SNPs within the 1 Mb *cis*-window of gene expression in all 35 tissues. A total of 21,345 predictive tissue-gene models, ranging from 1 in adrenal to 6,367 in lung, with cross-vali dated correlation ρ > 0.1 and prediction performance *P* < 0.05 were selected for subsequent analyses (**Supplementary Fig.** 21a). Using the S-PrediXcan tool and trained models, we predicted gene–trait associations at the single-tissue level and performed multiple testing by using p.adjust function in R (v4.0.2) with the parameter *Method = “BH”* across *P* values in association results and defined significant associations using FDR less than 0.05. In total, we detected 2,225 significant tissue-gene-trait trios (FDR < 0.05; **Supplementary Table.** 19), ranging from 1 in adrenal to 547 in lymph and 1 in calf livability to 104 in protein percent (**Supplementary Fig.** 21b-c). In addition, we also applied Summary data-based Mendelian randomization analysis (SMR) between GWAS loci and molQTL by using smr (v1.4.0) software with the parameter “--diff-freq-prop 1”41. We next performed multiple testing by using p.adjust function in R (v4.0.2) with the parameter *Method = “BH”* across p_SMR values in SMR results and defined significant associations using FDR less than 0.05. As the results, we identified 1,542 significant tissue-gene-trait trios (FDR < 0.05; **Supplementary Table.** 20), ranging from 3 in tonsil to 183 in immune system and 1 in calf livability to 172 in body depth (**Supplementary Fig.** 21d-e). All gene prediction models and SMR/TWAS results for GWAS loci were uploaded to our CattlePhase1 website (<https://cattlegtex.farmgtex.org/>).

**Supplementary Figures**
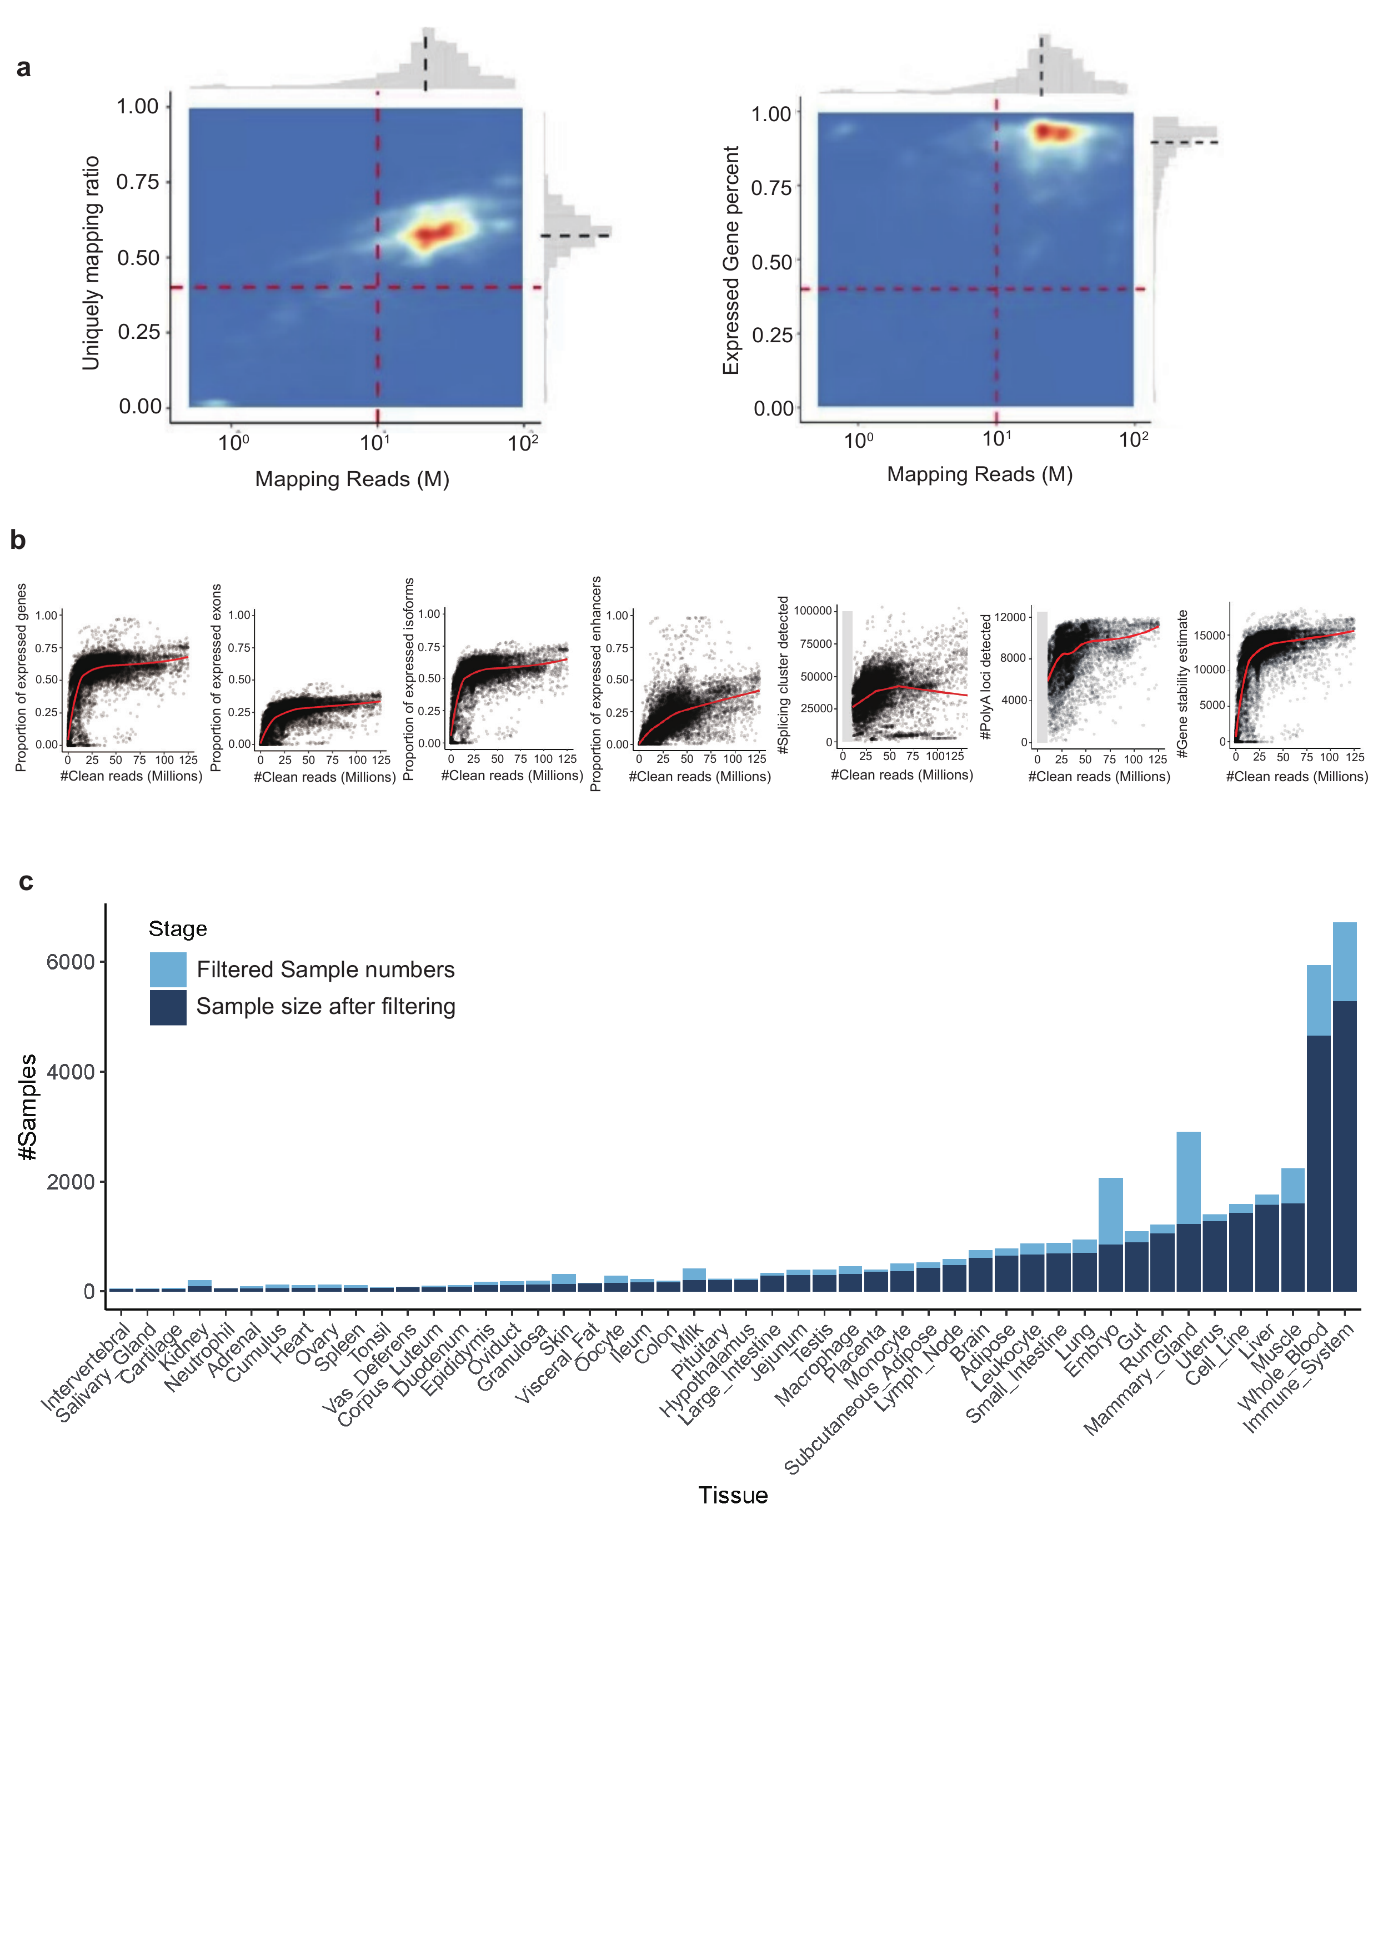


**Supplementary Fig. 1 | a**, Relationship between the distributions of clean read count and mapping rate (**left**) and expressed gene ratio (**right**). Dashed red lines indicate the quality control thresholds. **b,** Smoothed lines (fitted using the *geom_smooth* function in ggplot2) between the number of clean reads and the ratio of expressed genes, expressed exons, expressed isoforms, expressed enhancers, spliced introns, expressed 3’UTR APA and estimated gene stabilities. **c,** Sample sizes before and after filtering across 43 tissues. Dark blue bars represent sample sizes after filtering, whereas light blue bars represent filtered sample sizes across 43 tissues. Detailed filtering thresholds were described in **Fig 2a**.


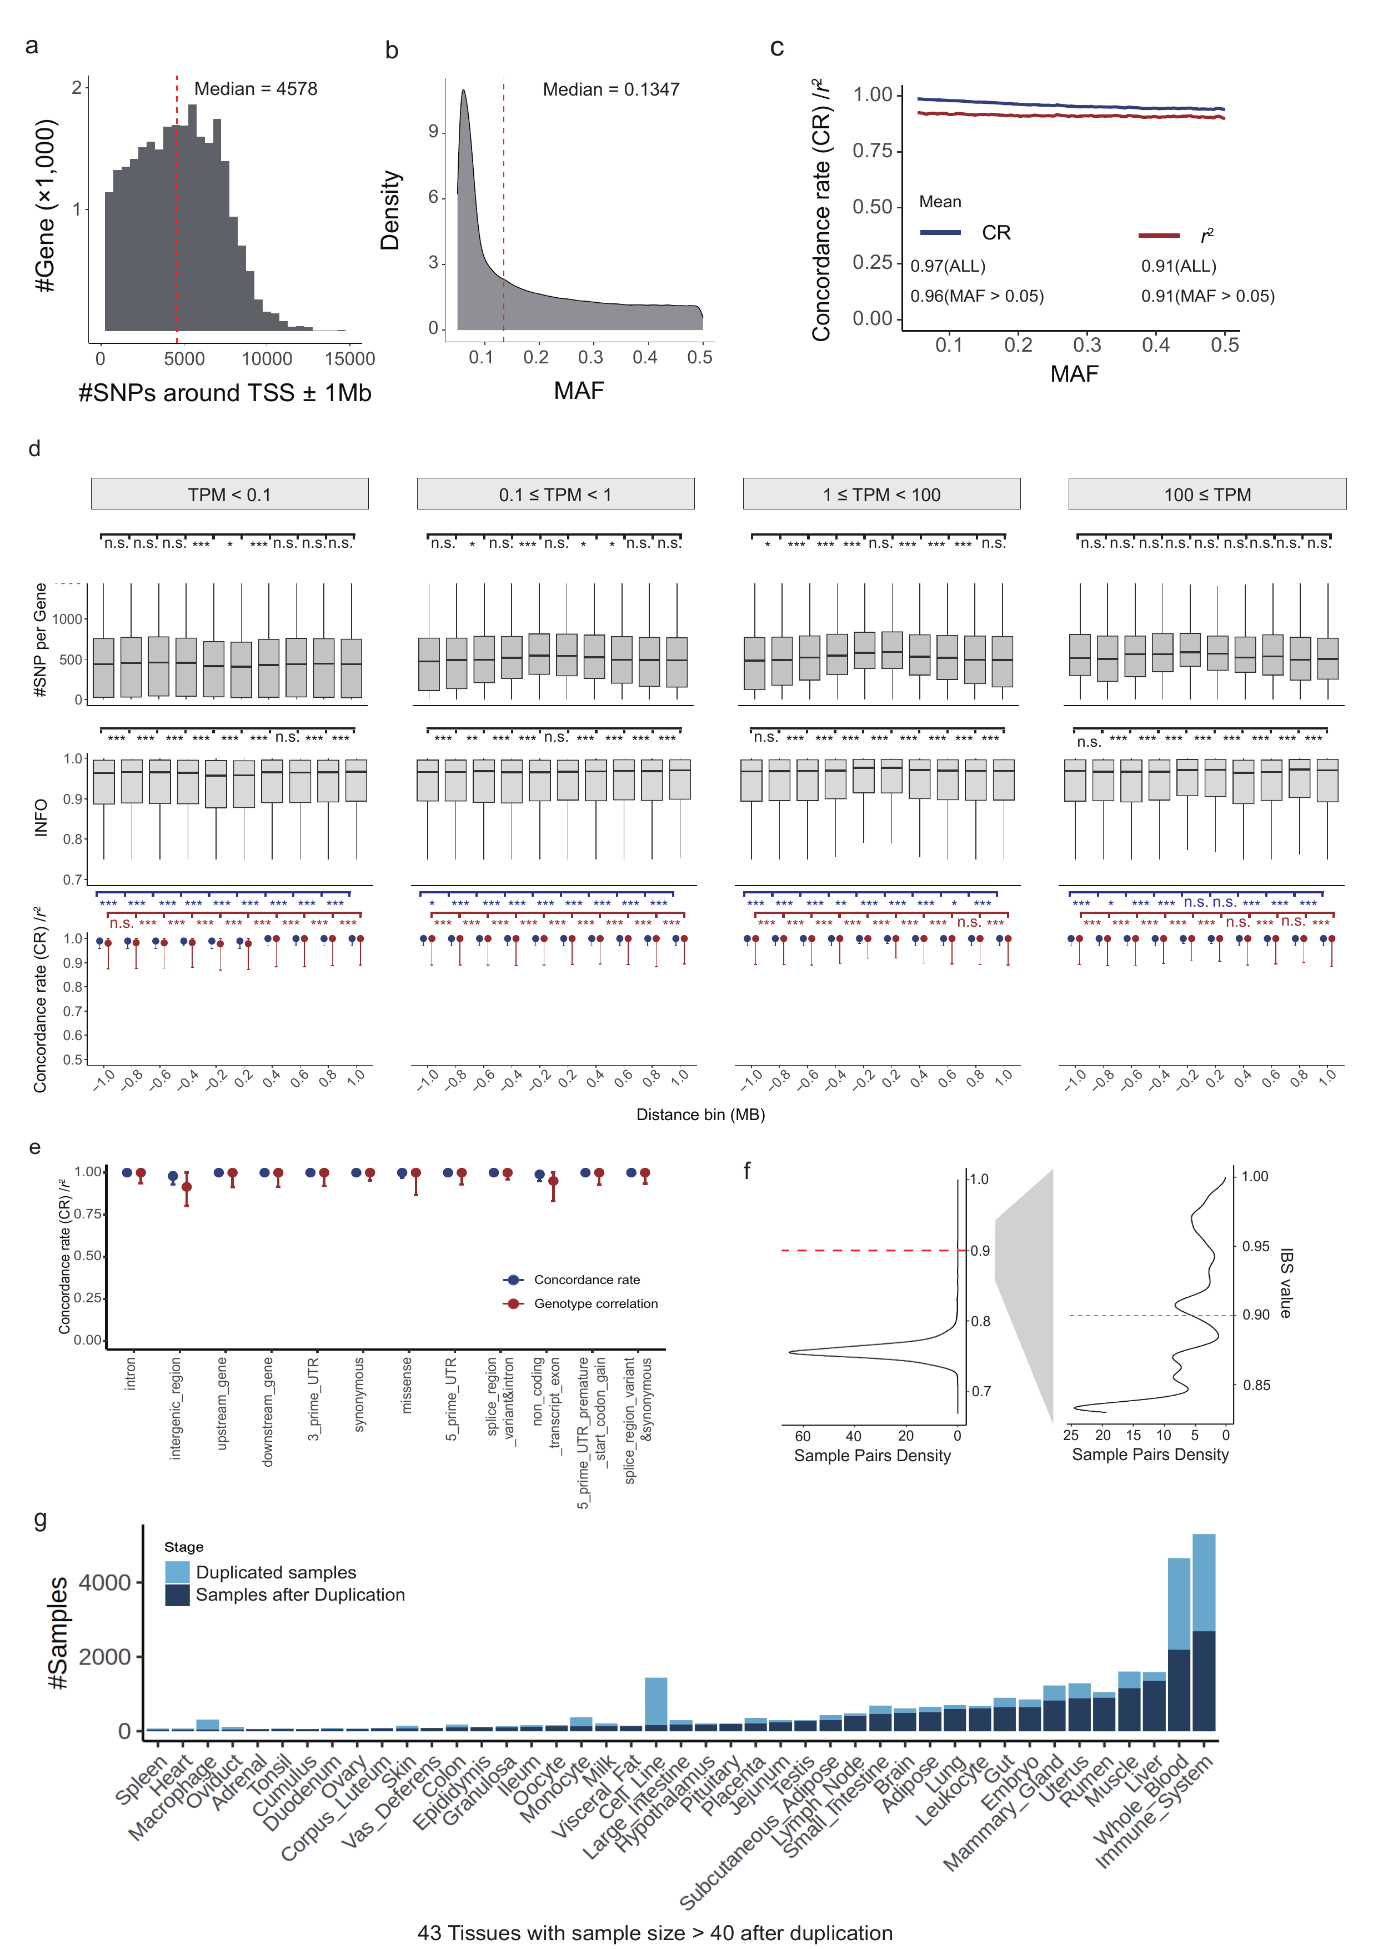


**Supplementary Fig. 2 | a-b,** Theper-gene *cis*-SNP count MAF distribution of 4,317,531 high-quality imputed SNPs in RNA-seq samples**. c,** Imputation accuracy across 50 minor allele frequency (MAF) bins after INFO filtering. **d,** Number of imputed high-quality SNPs (top), INFO score (middle), and genotype concordance with Spearman’s correlation (bottom, mean ± s.d.) plotted against distance to the TSS, stratified by median gene expression across samples. The boxplot shows the median as the central line, the 25th–75th percentiles as the box limits, and whiskers extending 1.5× the interquartile range. Statistical significance was determined using a two-sided Student’s t-test. ***: P < 0.001, **: P < 0.01, *: P < 0.05, n.s: not significant. **e,** Genotype concordance and Spearman’s correlation (mean ± s.d.) across different variant types. **f,** Distribution of IBS scores among all RNA-seq samples. **g,** Sample sizes before and after removing duplication.


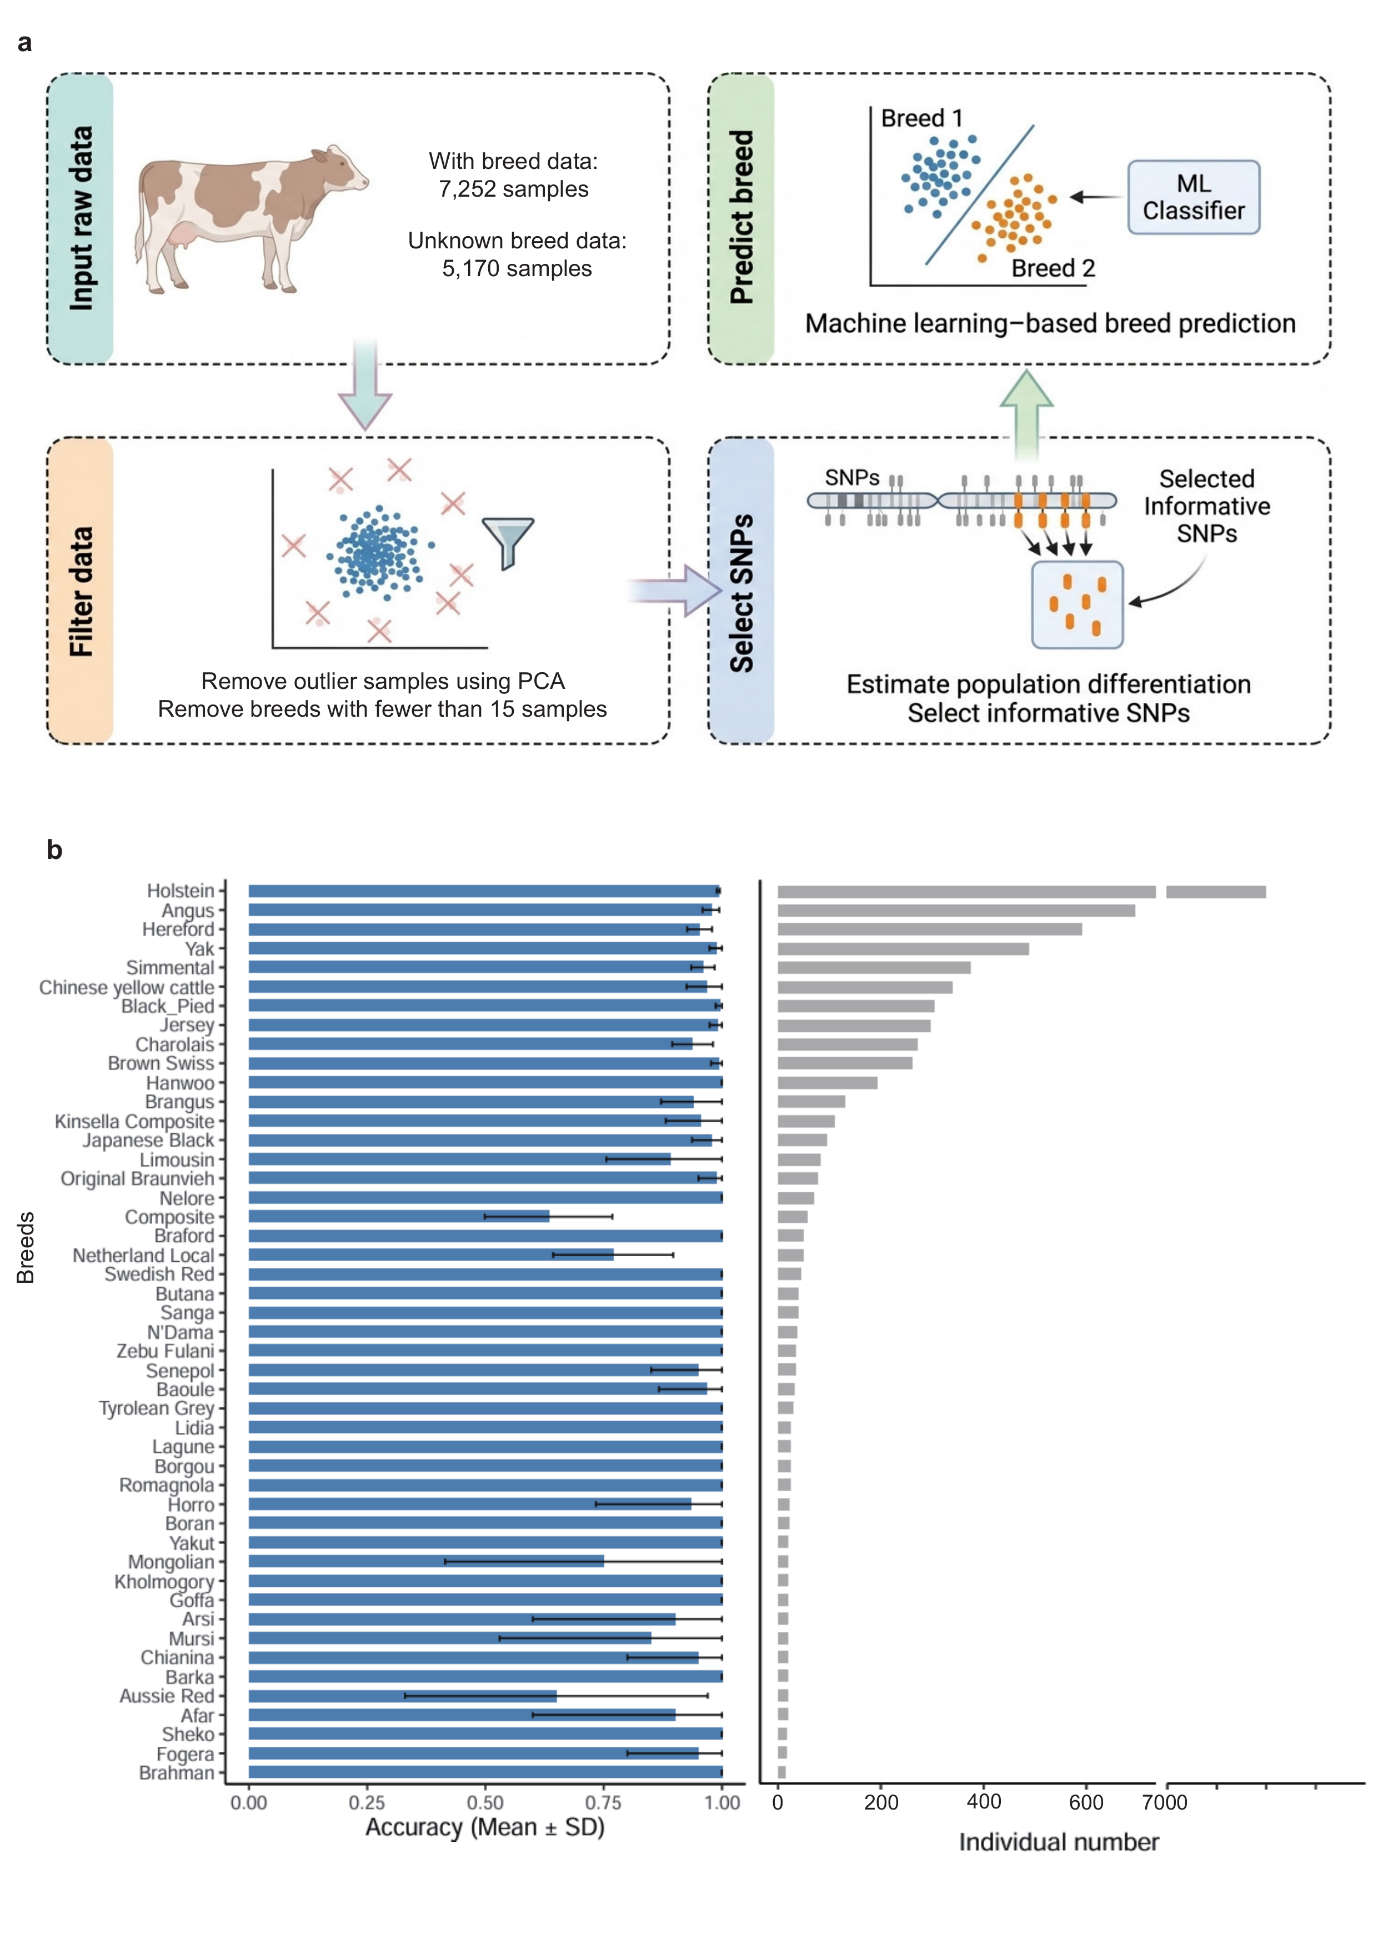


**Supplementary Fig. 3 | a,** Workflow for predicting cattle breeds based on genotypes imputed from RNA-seq data. **b,** Sample size and corresponding prediction accuracy across tissues.


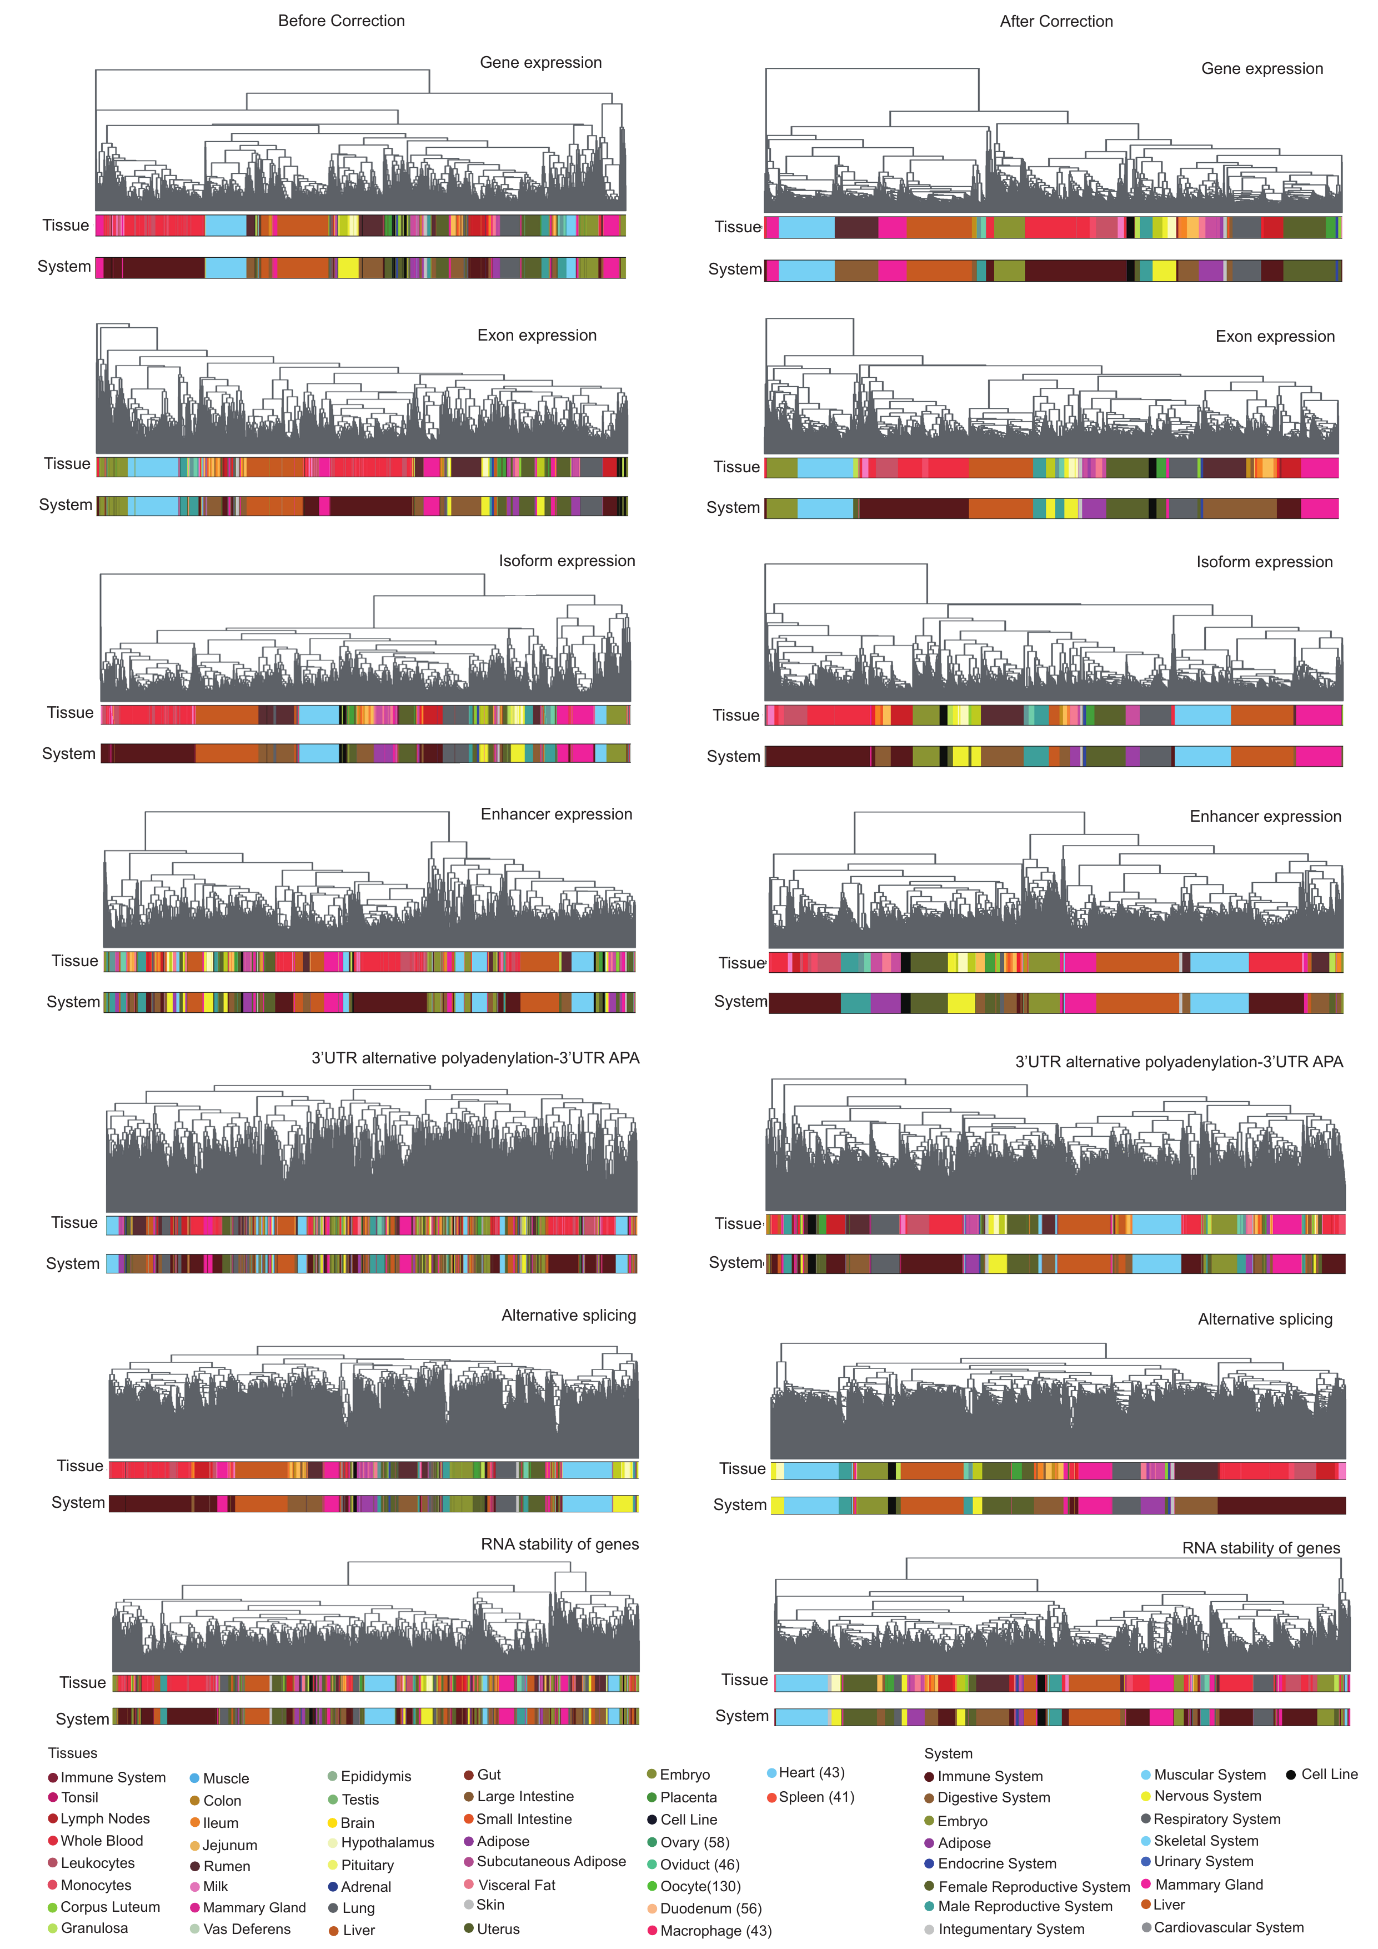


**Supplementary Fig. 4 |** Hierarchical clustering of seven molecular phenotypes based on the expression levels of the ~20% most variable features (ranked by standard deviation). Clustering was performed using the *hclust* function in R (v4.3.0), with a distance matrix of (1 − *r*), where *r* denotes the Pearson’s correlation coefficient. For abundance-based molecular phenotypes, input values were log2(TPM + 0.25); for structure-based phenotypes, normalized values were used.


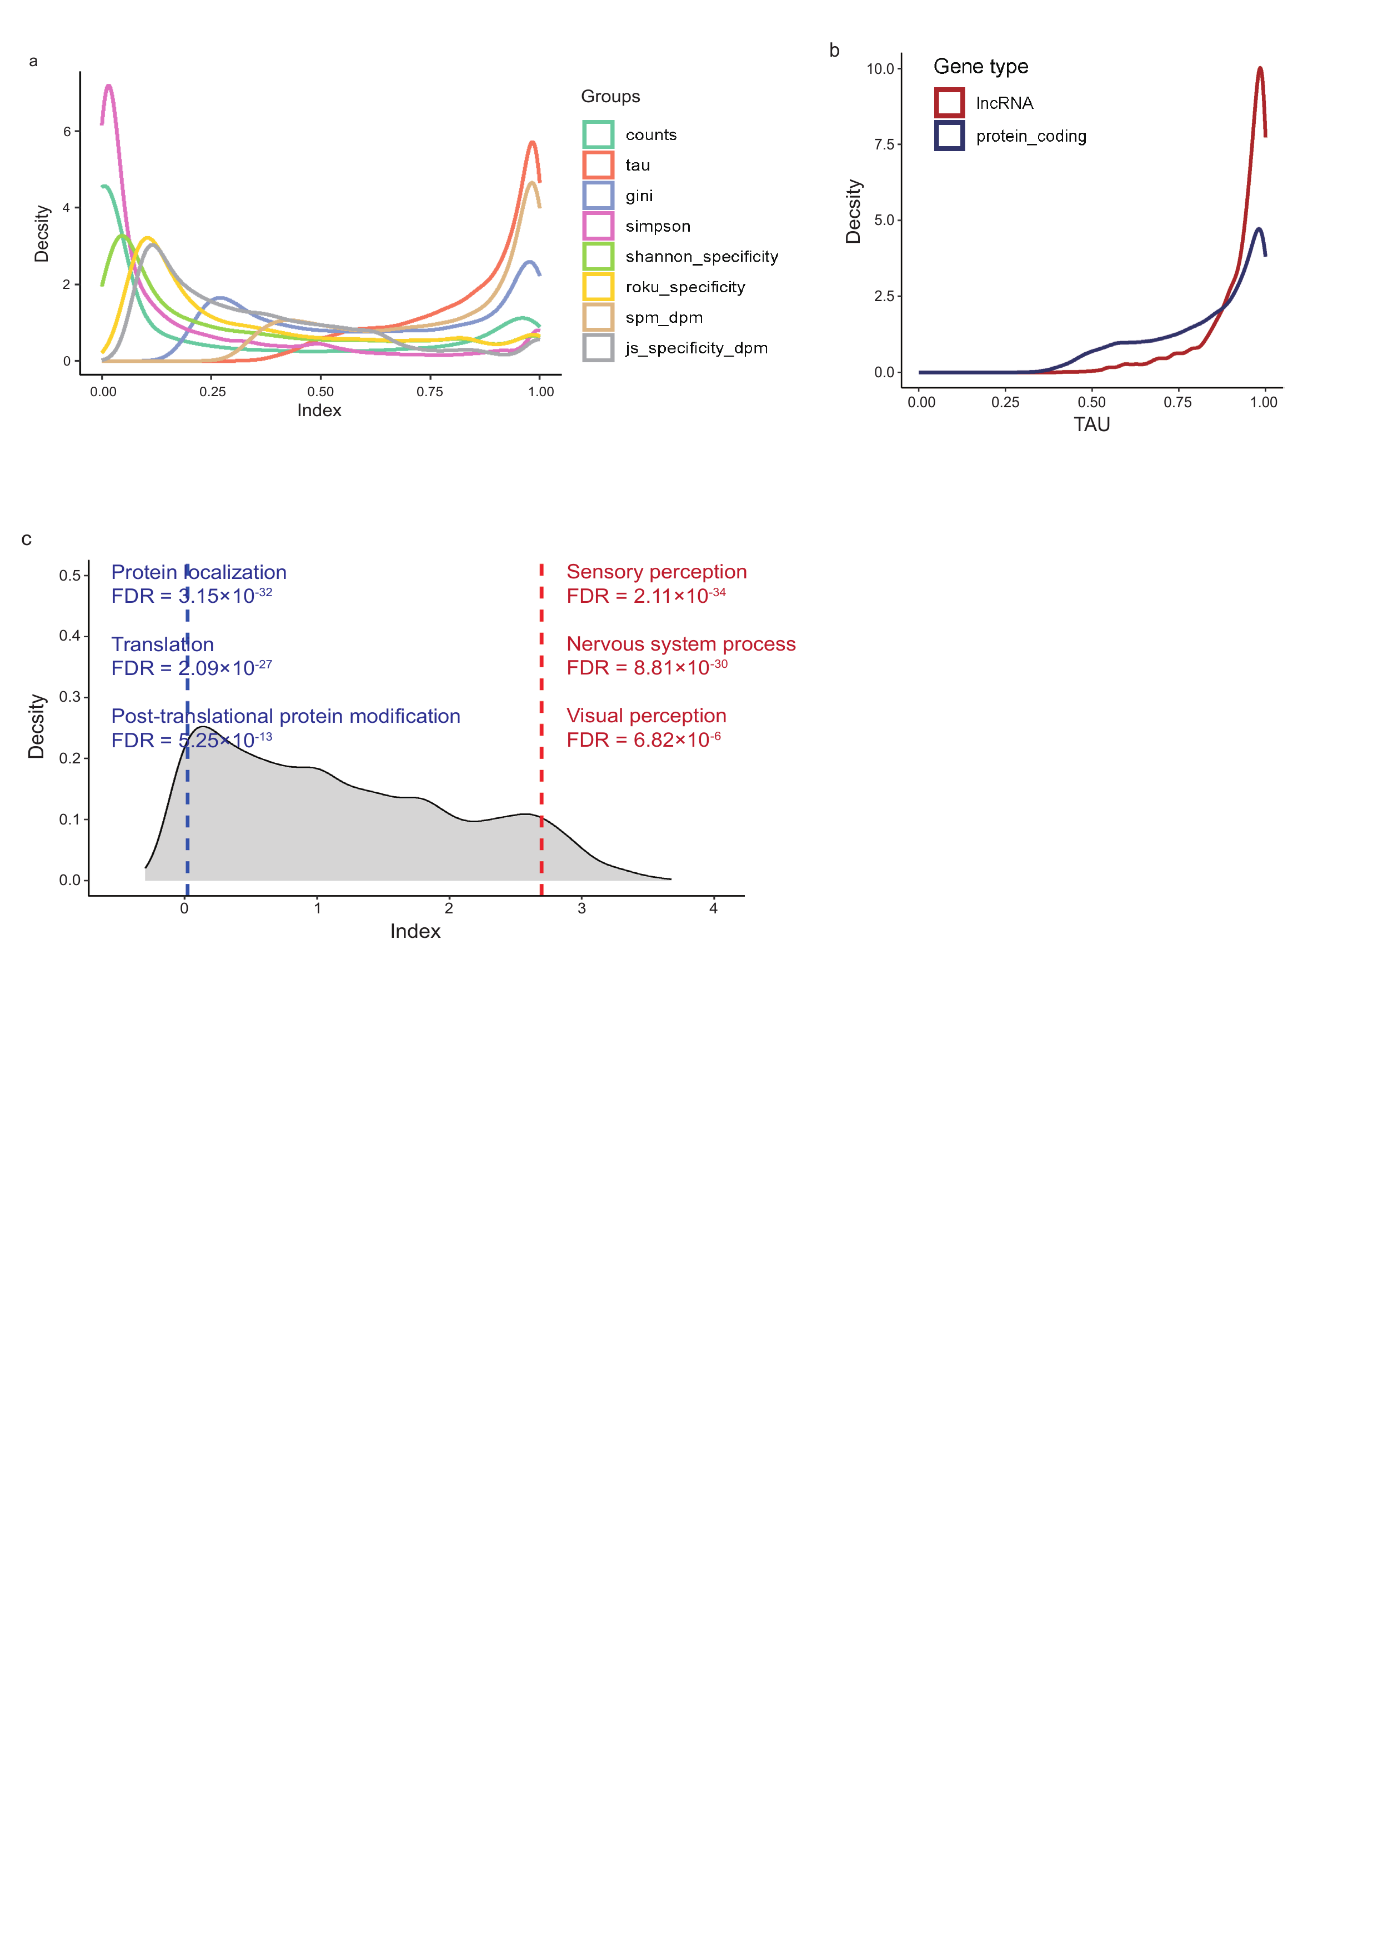


**Supplementary Fig. 5 | a,** Specificity of gene expression estimated by eight methods. **b,** Expression specificity of protein coding gene and long non-coding mRNA estimated by TAU value. **c,** Distribution of the log-transformed coefficient of variation (CV) of gene expression, along with Gene Ontology (GO) terms enriched among the top 2,000 genes with the highest and lowest expression variance. GO enrichment analysis was performed using *enrichGO* function from clusterProfiler package (v4.8.3) with the org.Hs.eg.db (v3.16.0) database.


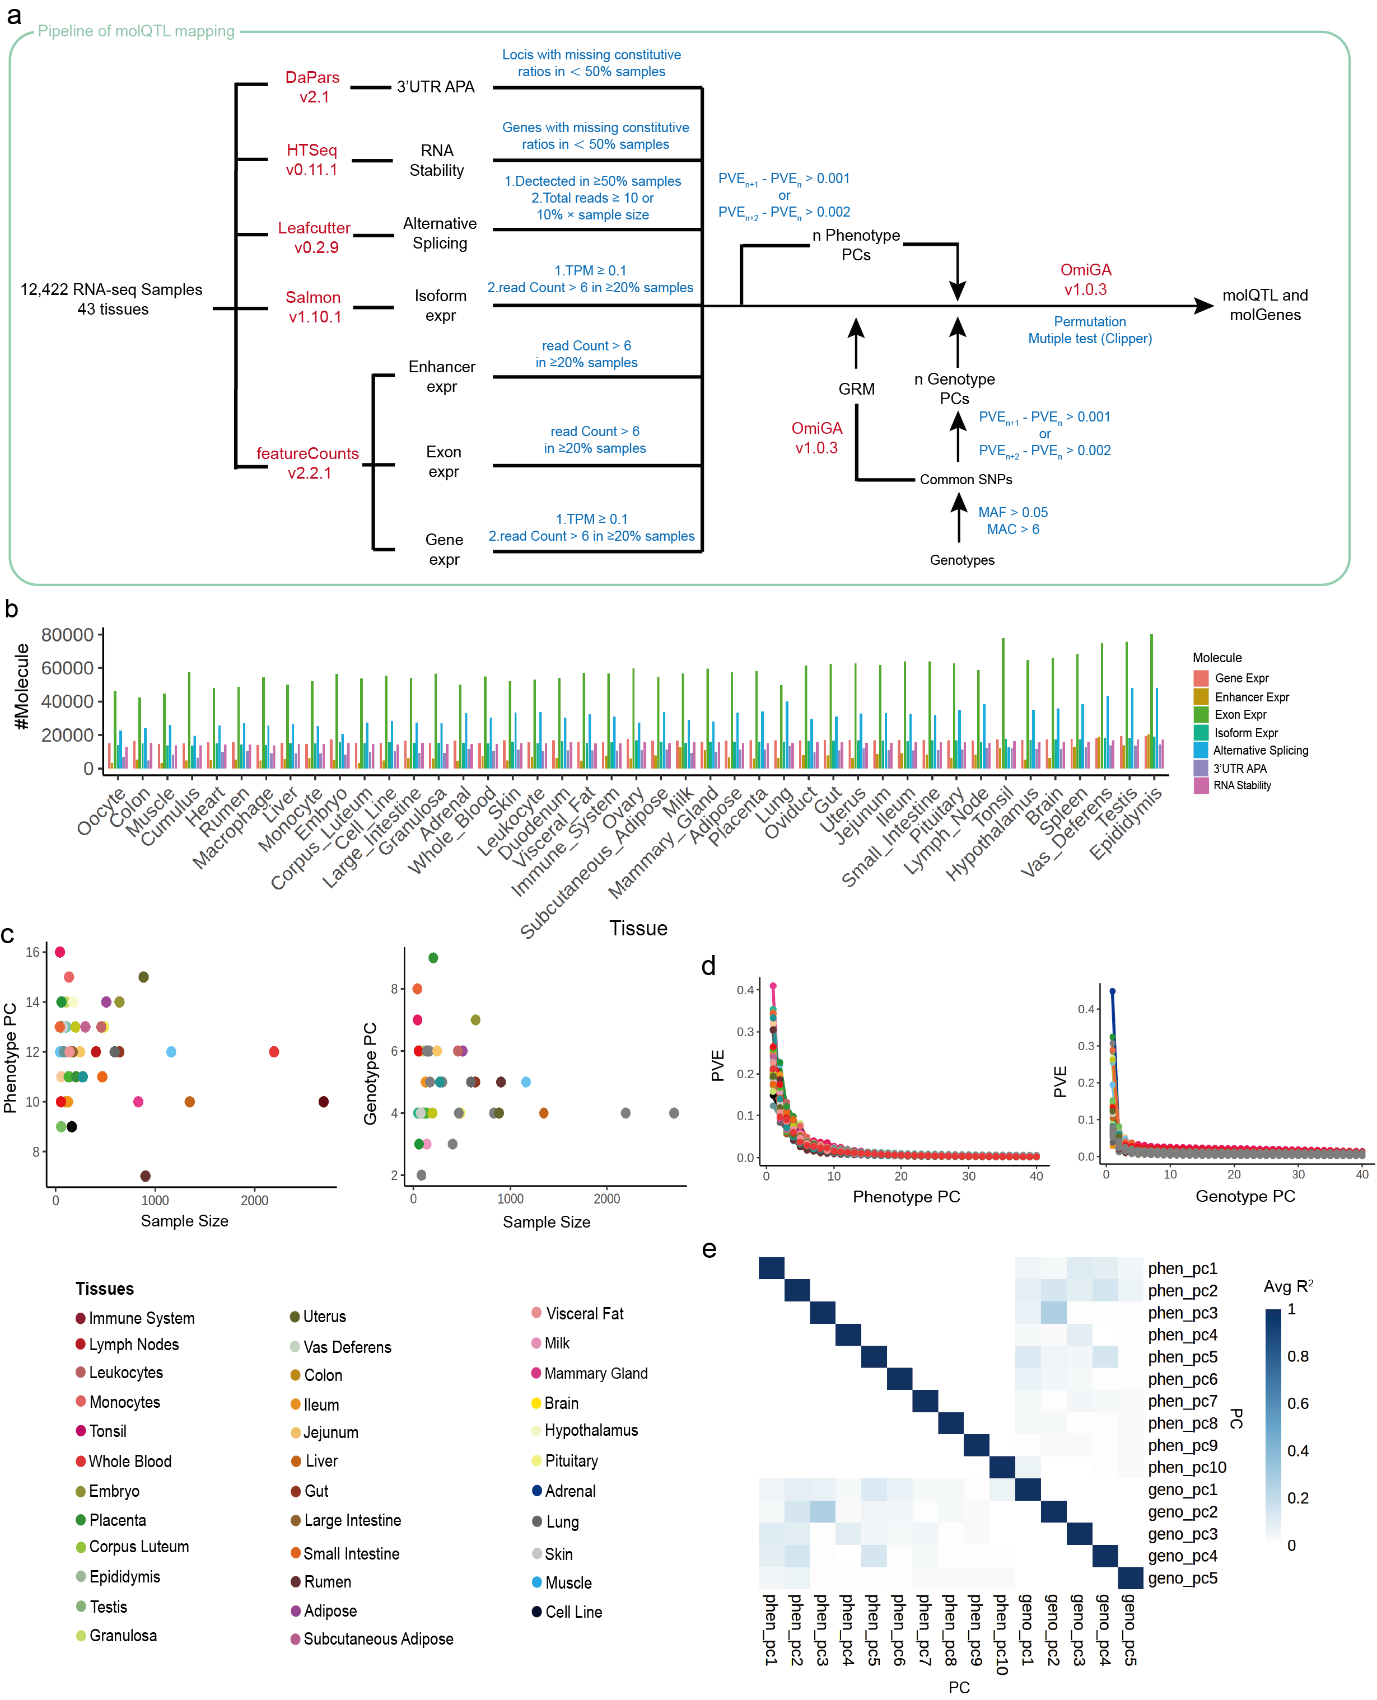


**Supplementary Fig. 6 | a,** Workflow for identification of seven molecular phenotypes and *cis*-molQTL mapping. Red texts represent software used and blue texts represent thresholds or parameters used in this workflow. **b,** Counts of seven molecules estimated across 43 tissues. **c,** Number of estimated gene expression principal components (PCs, left) and genotype PCs (right) as a function of sample size across 43 tissues. **d,** Proportion of variance explained (PVE) by each expression PC (left) and genotype PC (right) across 43 tissues. **e,** Mean adjusted R2 of the top 10 expression and top 5 genotype PCs across 43 tissues.


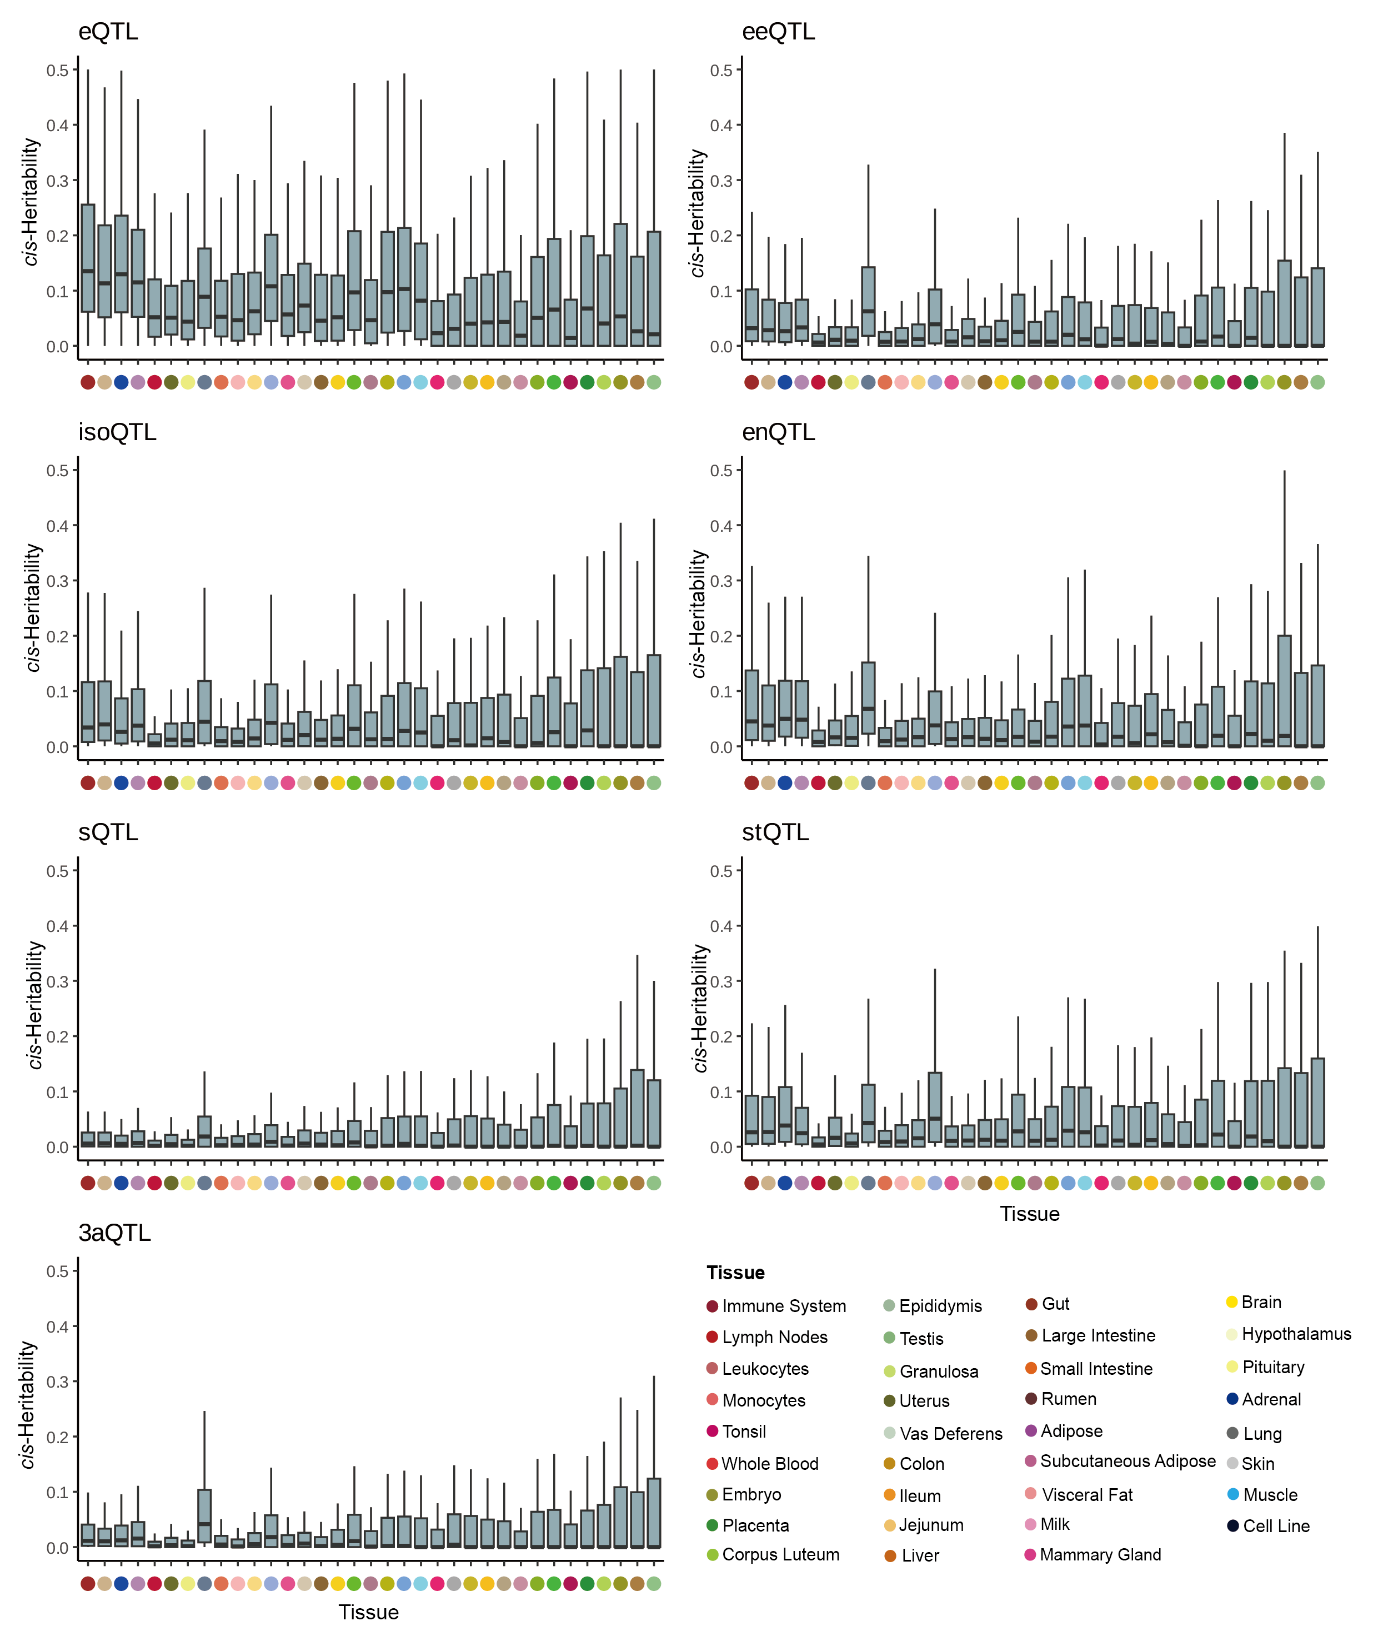


**Supplementary Fig. 7 |** The distribution of *cis*-heritability(*cis*-h2) across 43 tissues of different molecular phenotypes. Boxplots show the median (central line), 25th–75th percentiles (box), and whiskers extending 1.5× the interquartile range.


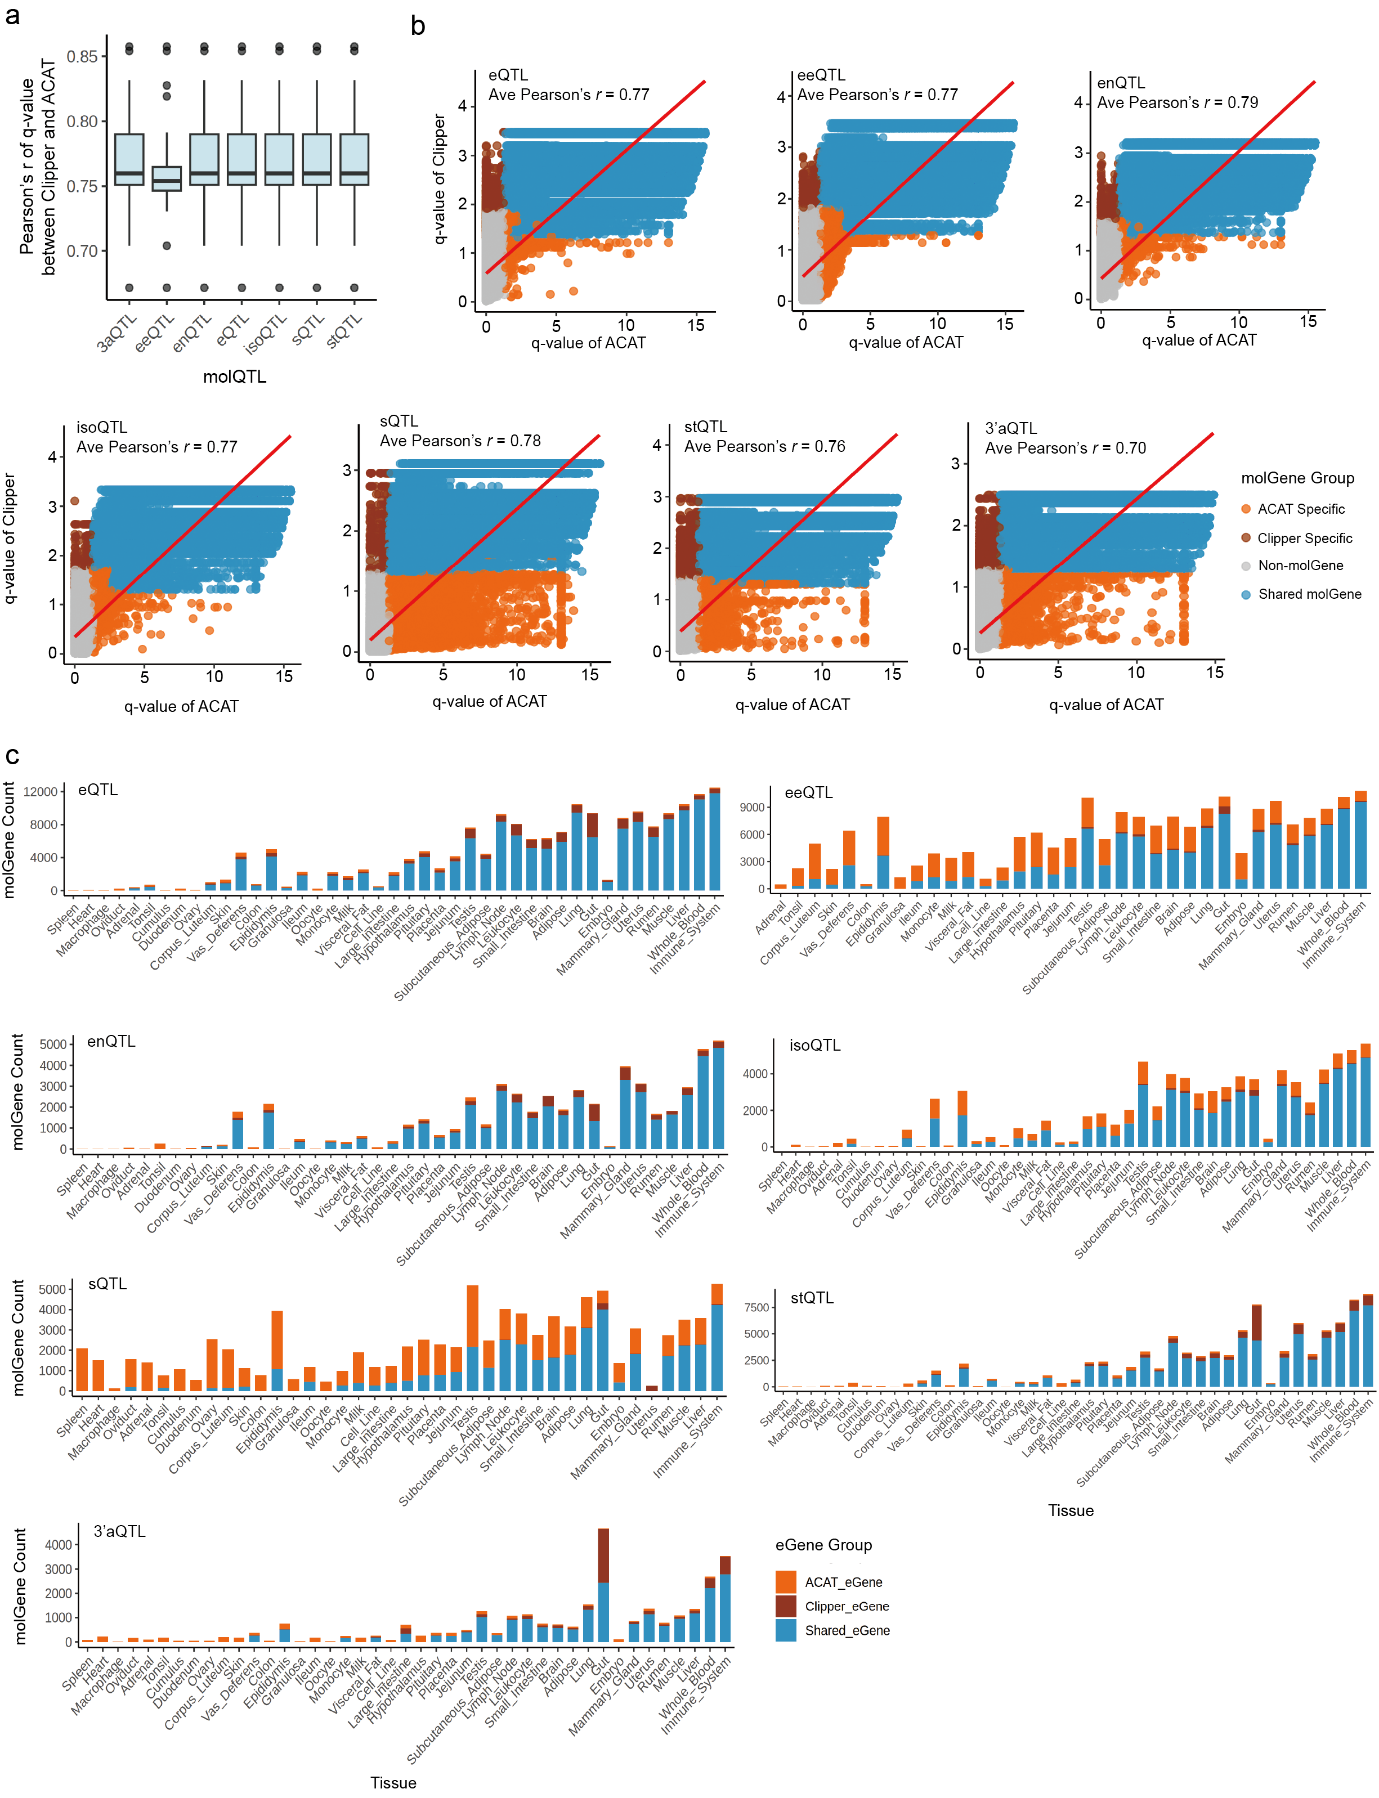


**Supplementary Fig. 8 | a,** Pearson’s correlation between q-value of all tested SNP between Clipper and ACAT multiple testing methods across seven molecular QTL (molQTL). b, The distribution of q-value in shared molQTL, ACAT-specific molQTL, Clipper-specific molQTL and non-significant SNPs between Clipper and ACAT multiple testing methods across seven molQTL. **c,** Counts of shared molGenes, ACAT-specific molGenes and Clipper molGenes across 43 tissues in seven molQTL.


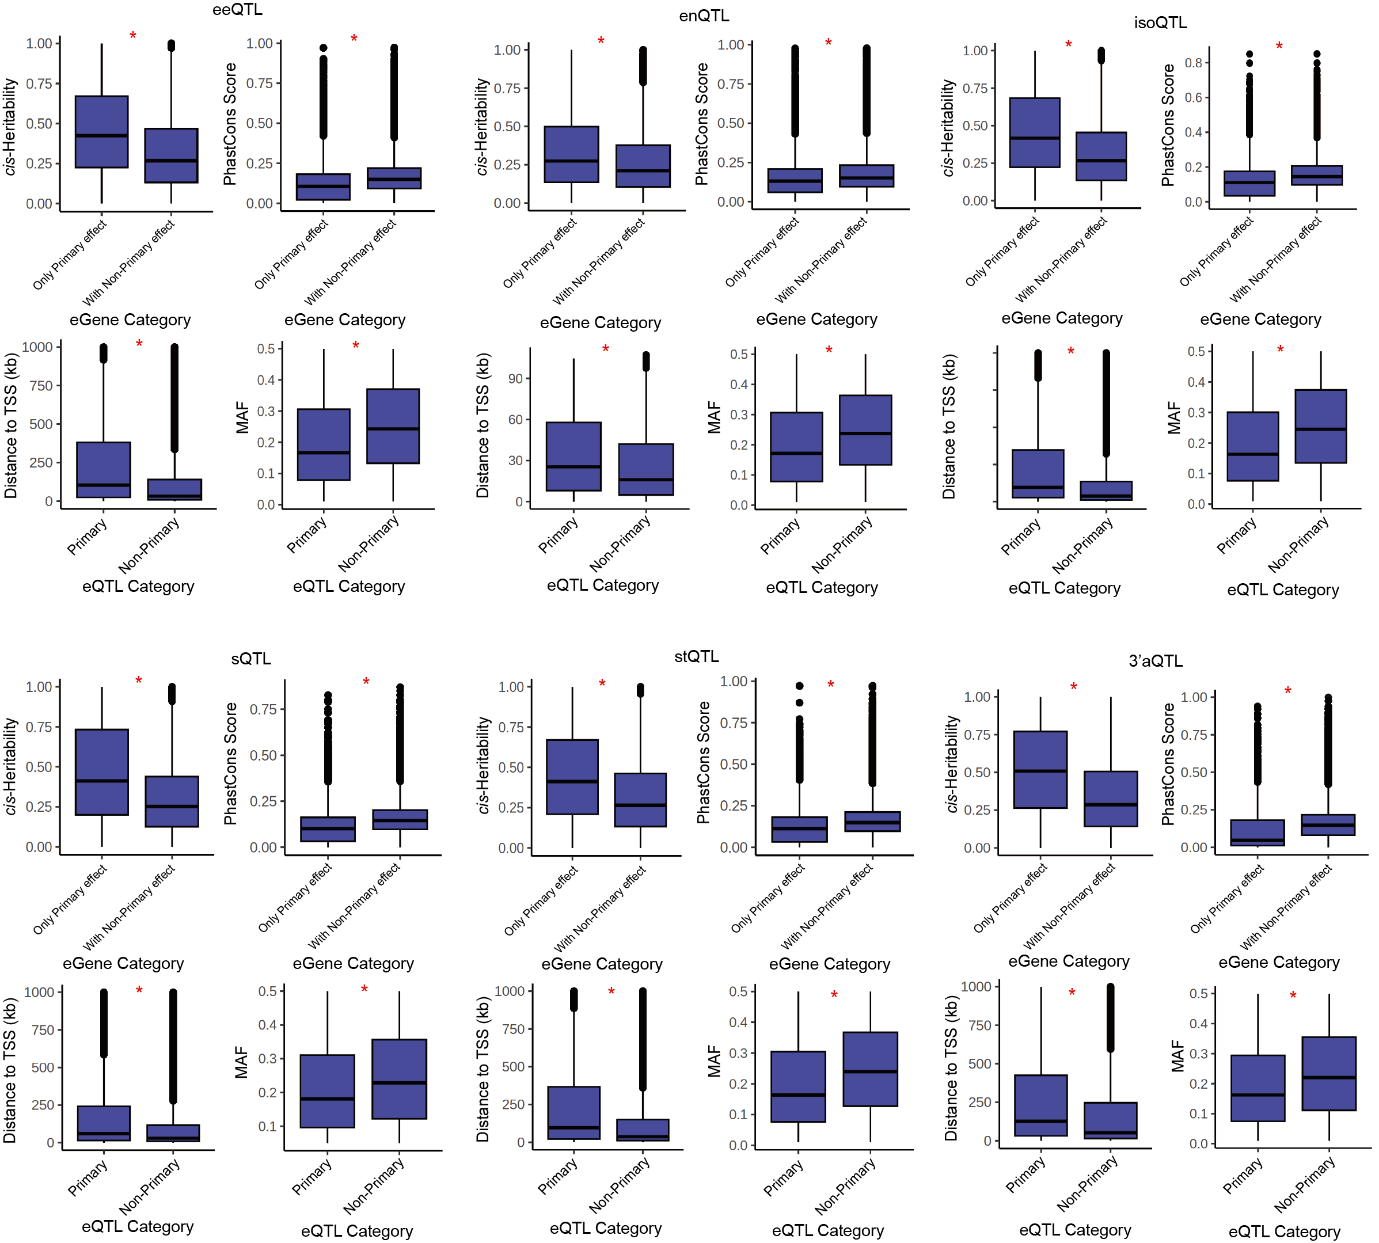


**Supplementary Fig. 9 |** Characteristics of molGenes with and without non-primary *cis*-molQTL and primary and non-primary *cis*-molQTL. (Top and Left) *cis*-heritability of molecules; (Top and Right) sequence constraint (PhastCons score); (Bottom and Left) distance to the target gene of molQTL; and (Bottom and Right) Minor Allele Frequency (MAF) of molQTL.


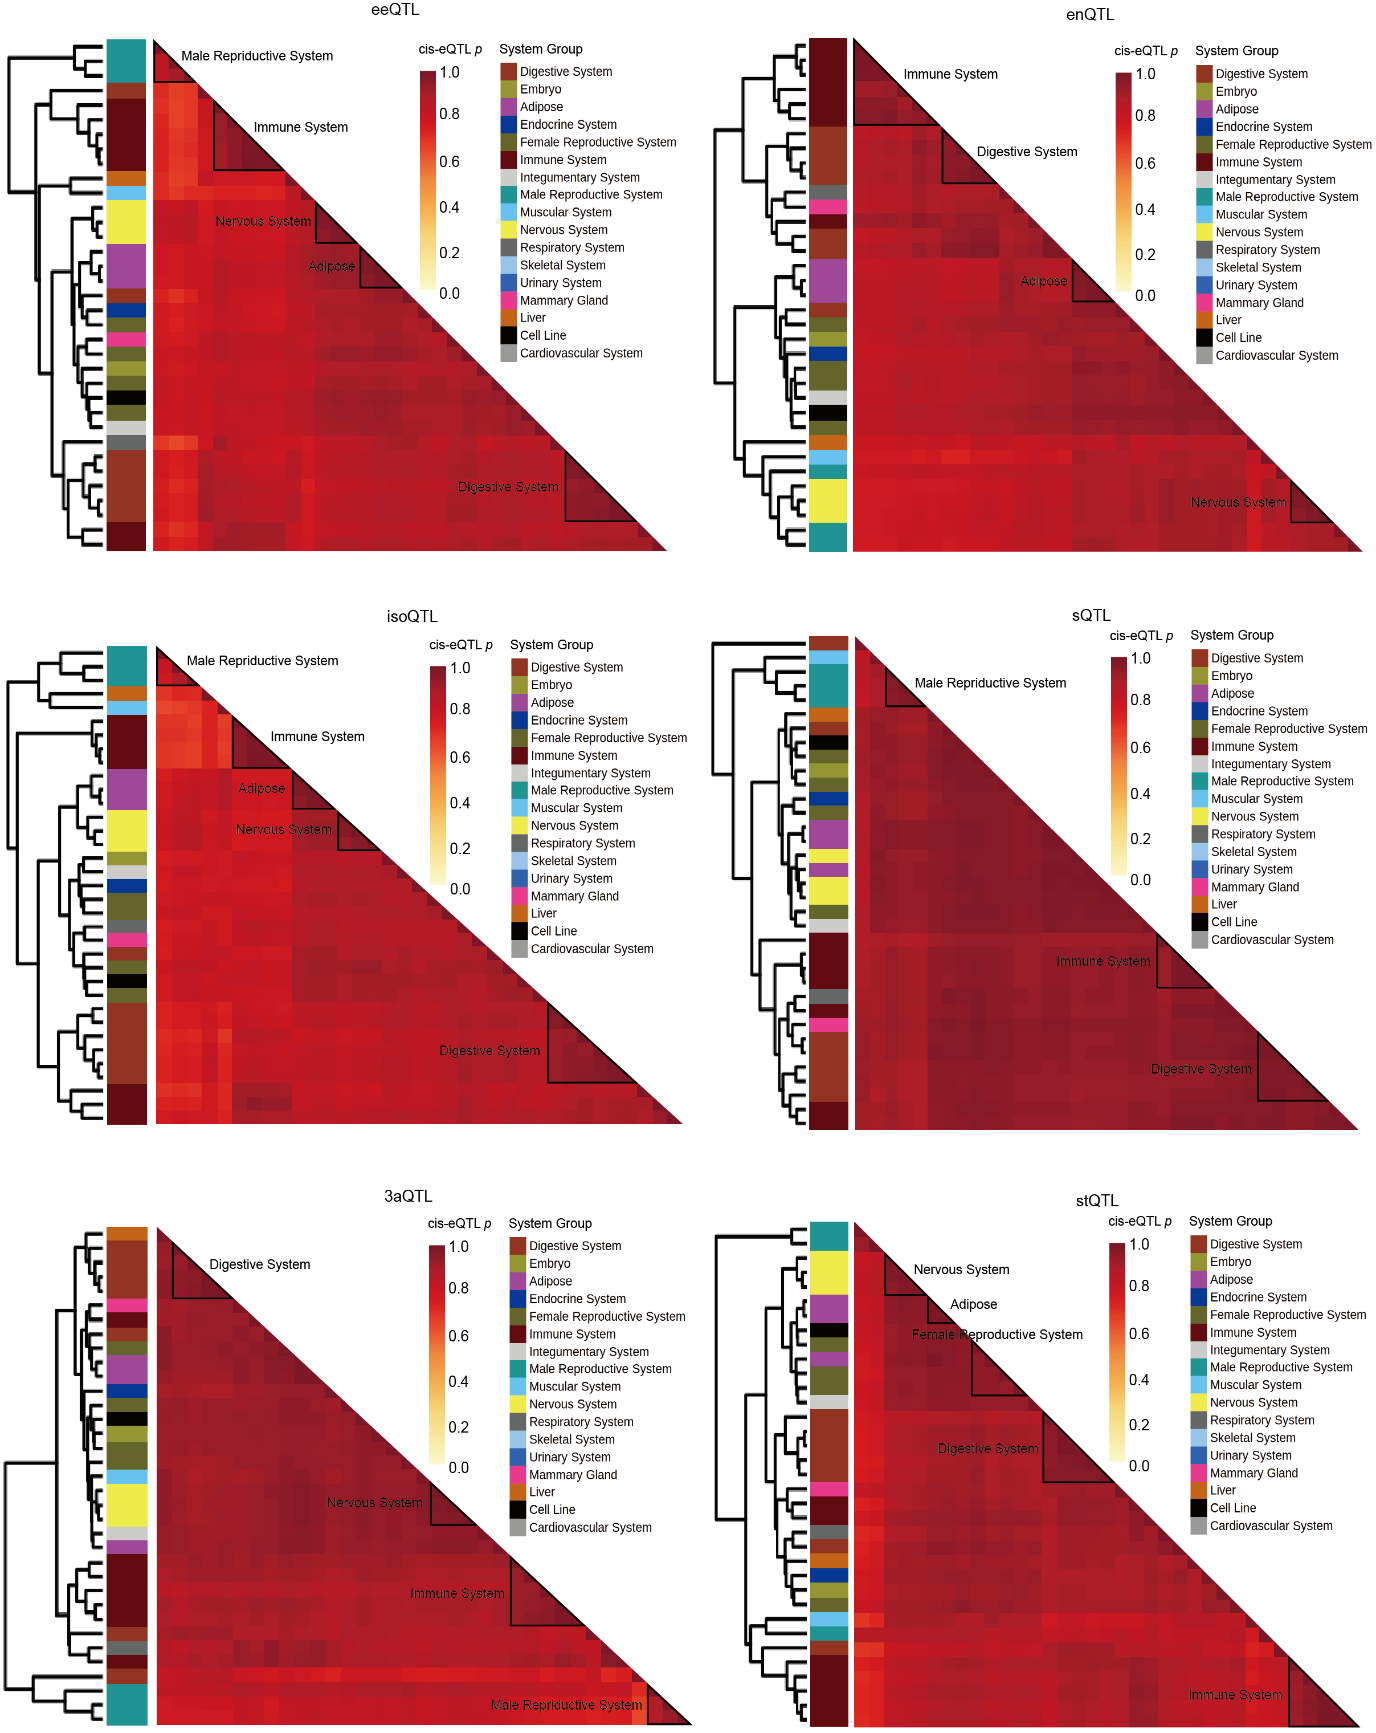


**Supplementary Fig. 10 |** Heatmap showing pairwise Spearman’s correlation (*ρ*) of *cis*-molQTL effect sizes across 35 tissues. Tissues were hierarchically clustered using the complete linkage method based on the maximum distance of *ρ.*


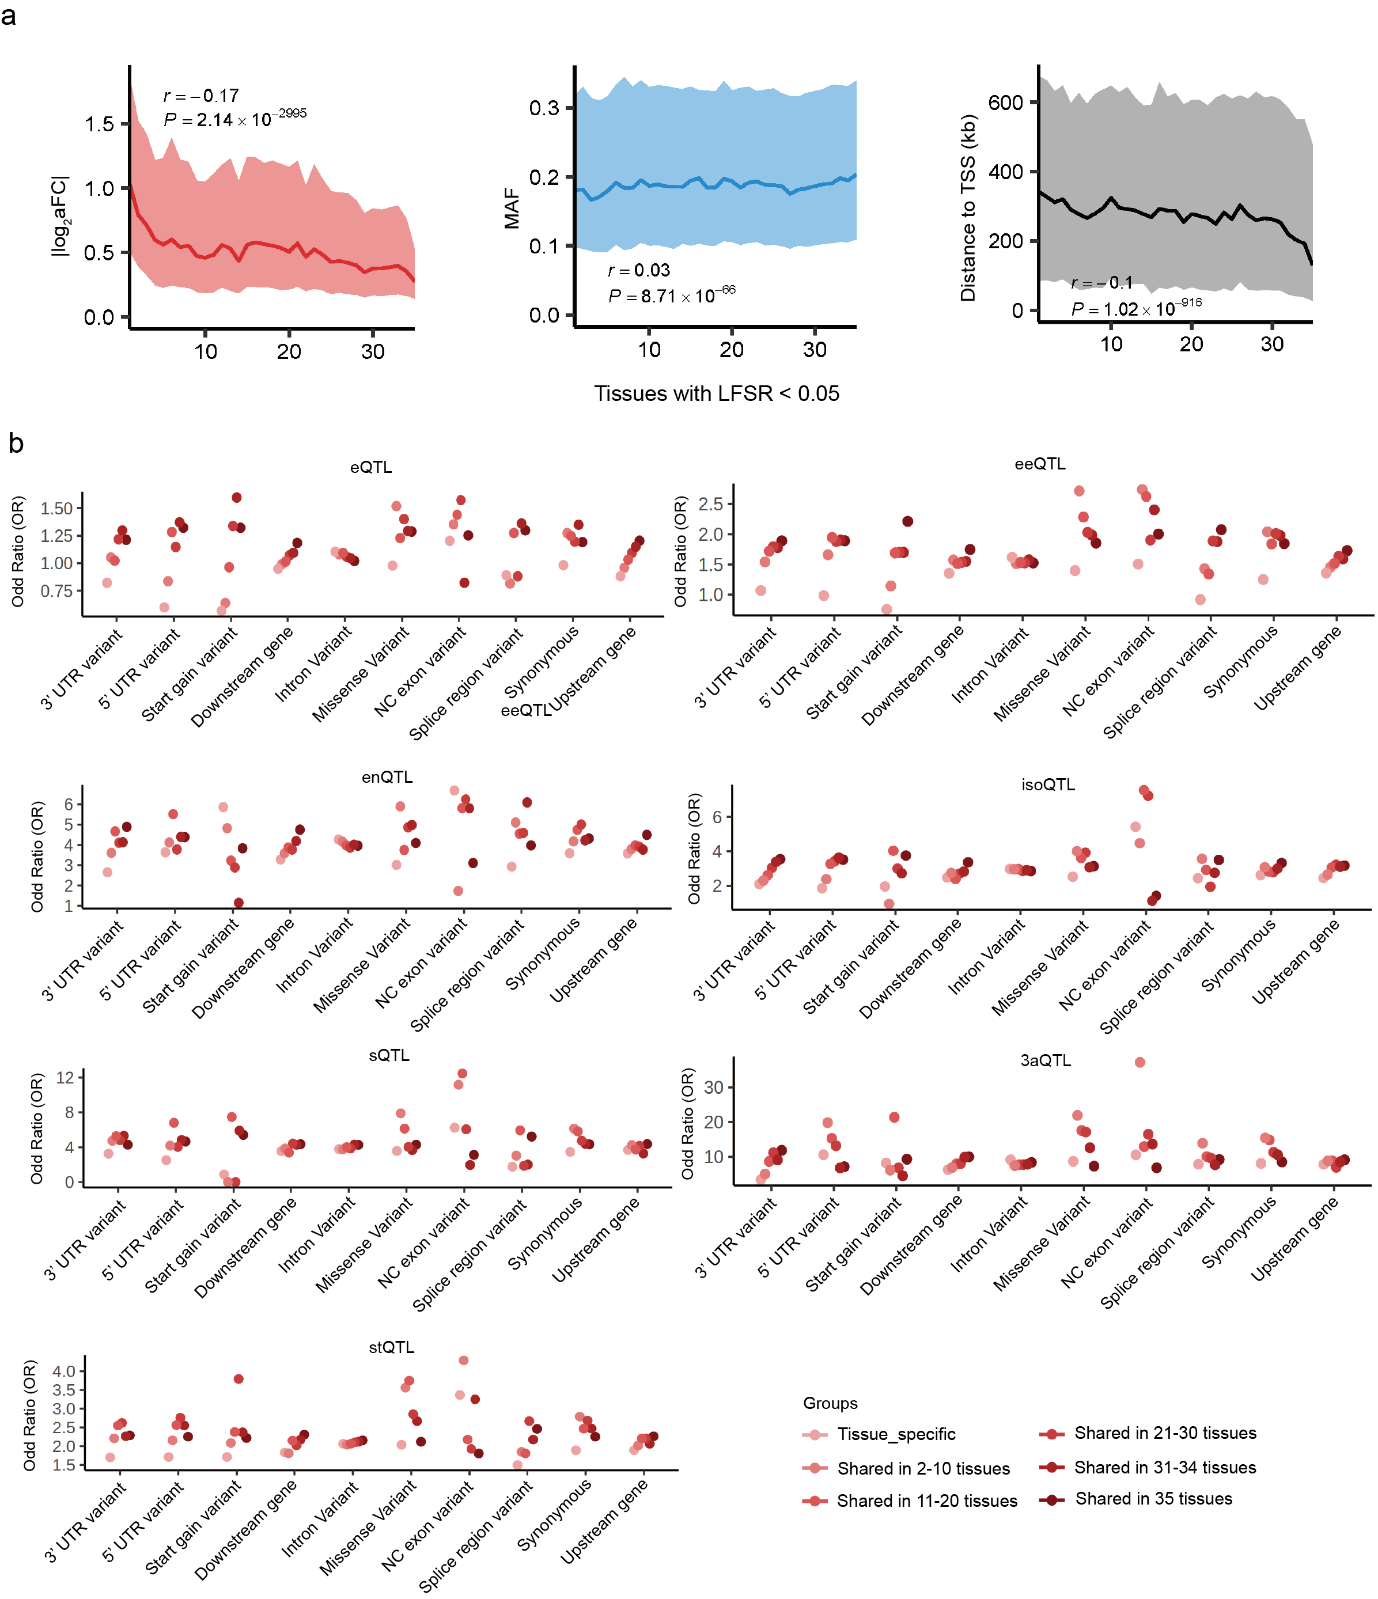


**Supplementary Fig. 11 | a,** Absolute effect size (allelic fold change, aFC; left), distance of eQTLs to the transcription start site (TSS; right), and minor allele frequency (MAF; middle) are plotted against the number of tissues in which the eQTL is active estimated by MashR (v0.2.57)58. Colored solid lines represent the median values across tissues, with different colors corresponding to each feature, and the shaded areas indicate the interquartile range. P-values were calculated using an asymptotic t approximation. **b,** Functional enrichment of tissue-shared molQTL with regulatory elements.


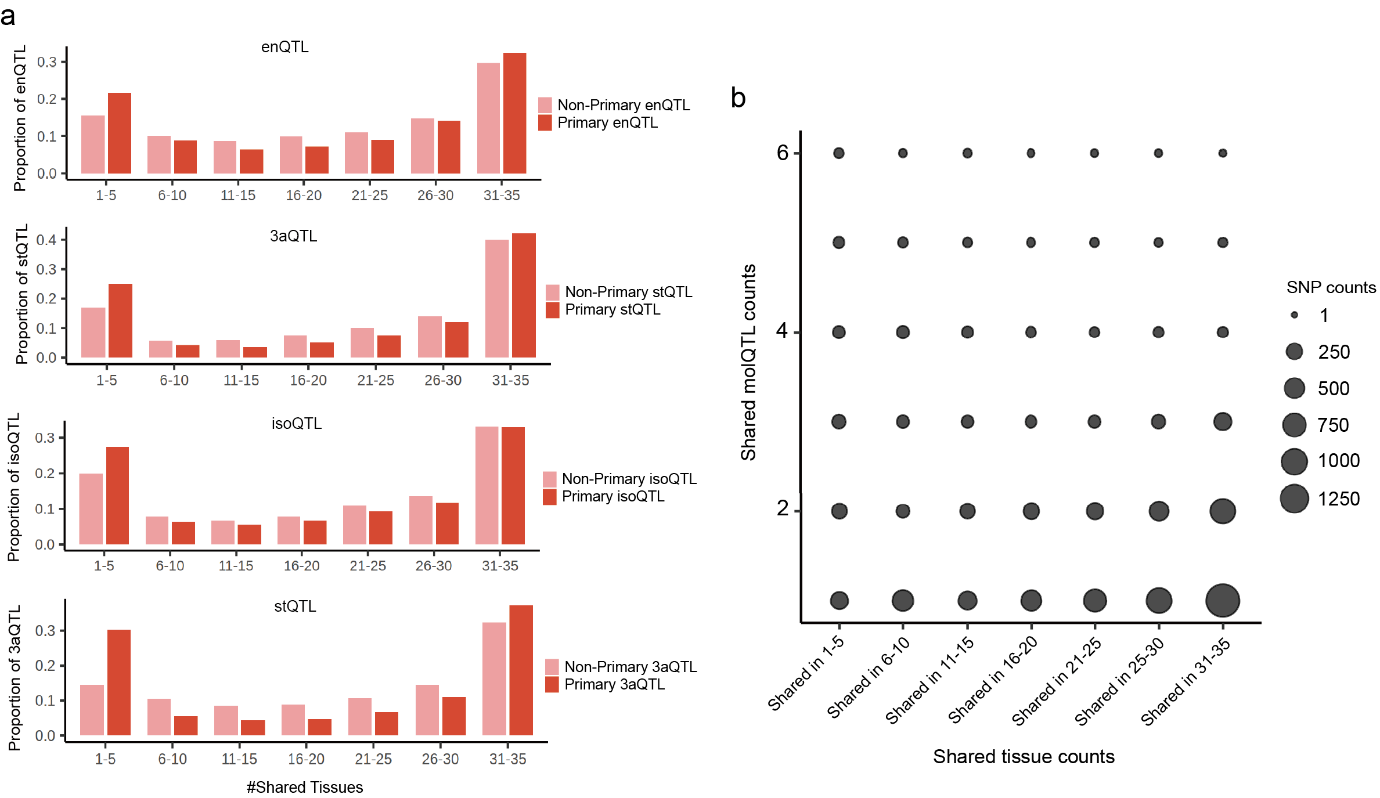


**Supplementary Fig. 12 | a,** Proportion of primary and non-primary *cis*-molQTL active across different numbers of tissues. **b,** Distribution of eQTL under different shared tissue counts and shared molQTL count.

**Supplementary Fig. 13 |** Characteristics of seven tissue-specific/shared eQTL, including effect sizes, distances to TSS and MAF**
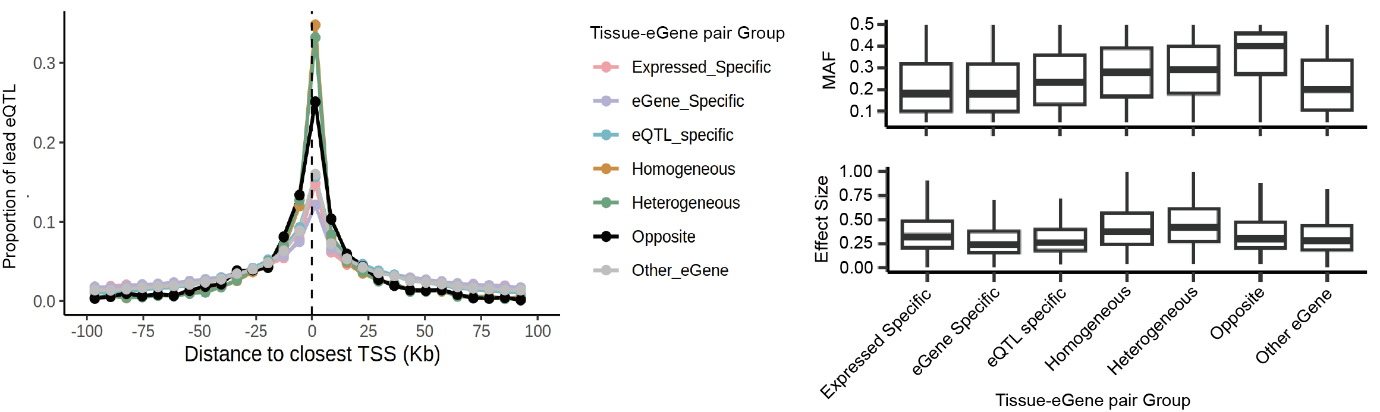
.**


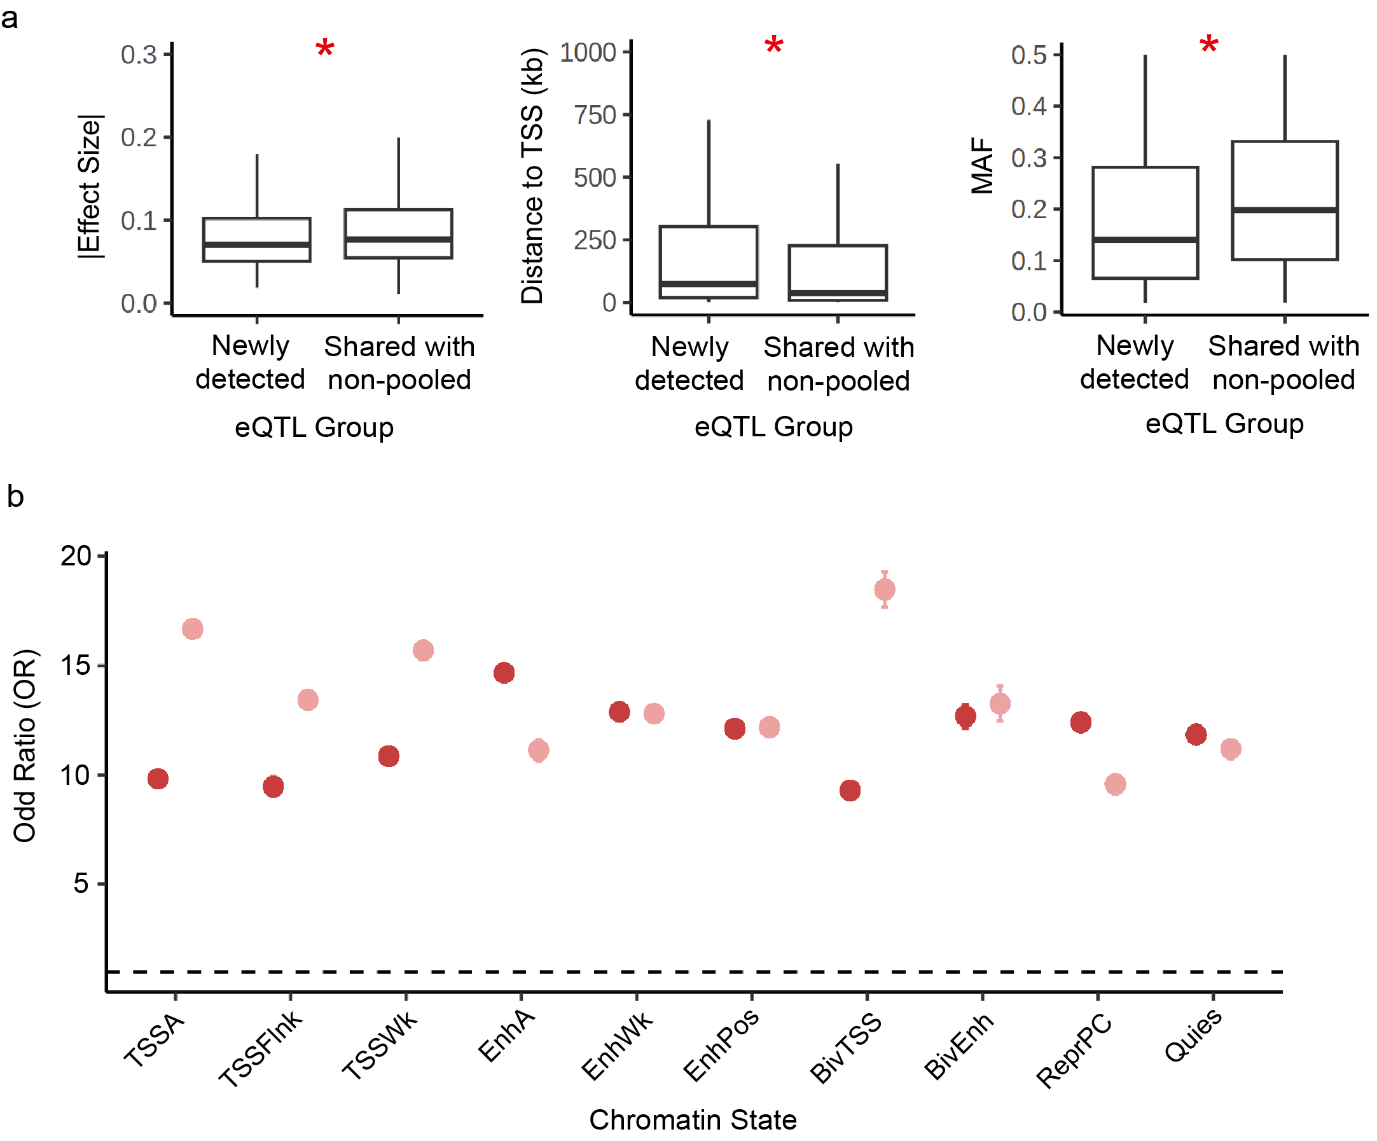


**Supplementary Fig. 14 | a,** Characteristics of pooled-sample and non-pooled eQTL, including effect sizes, distances to TSS and MAF. **b,** Functional enrichment of pooled-sample eQTL with regulatory elements.


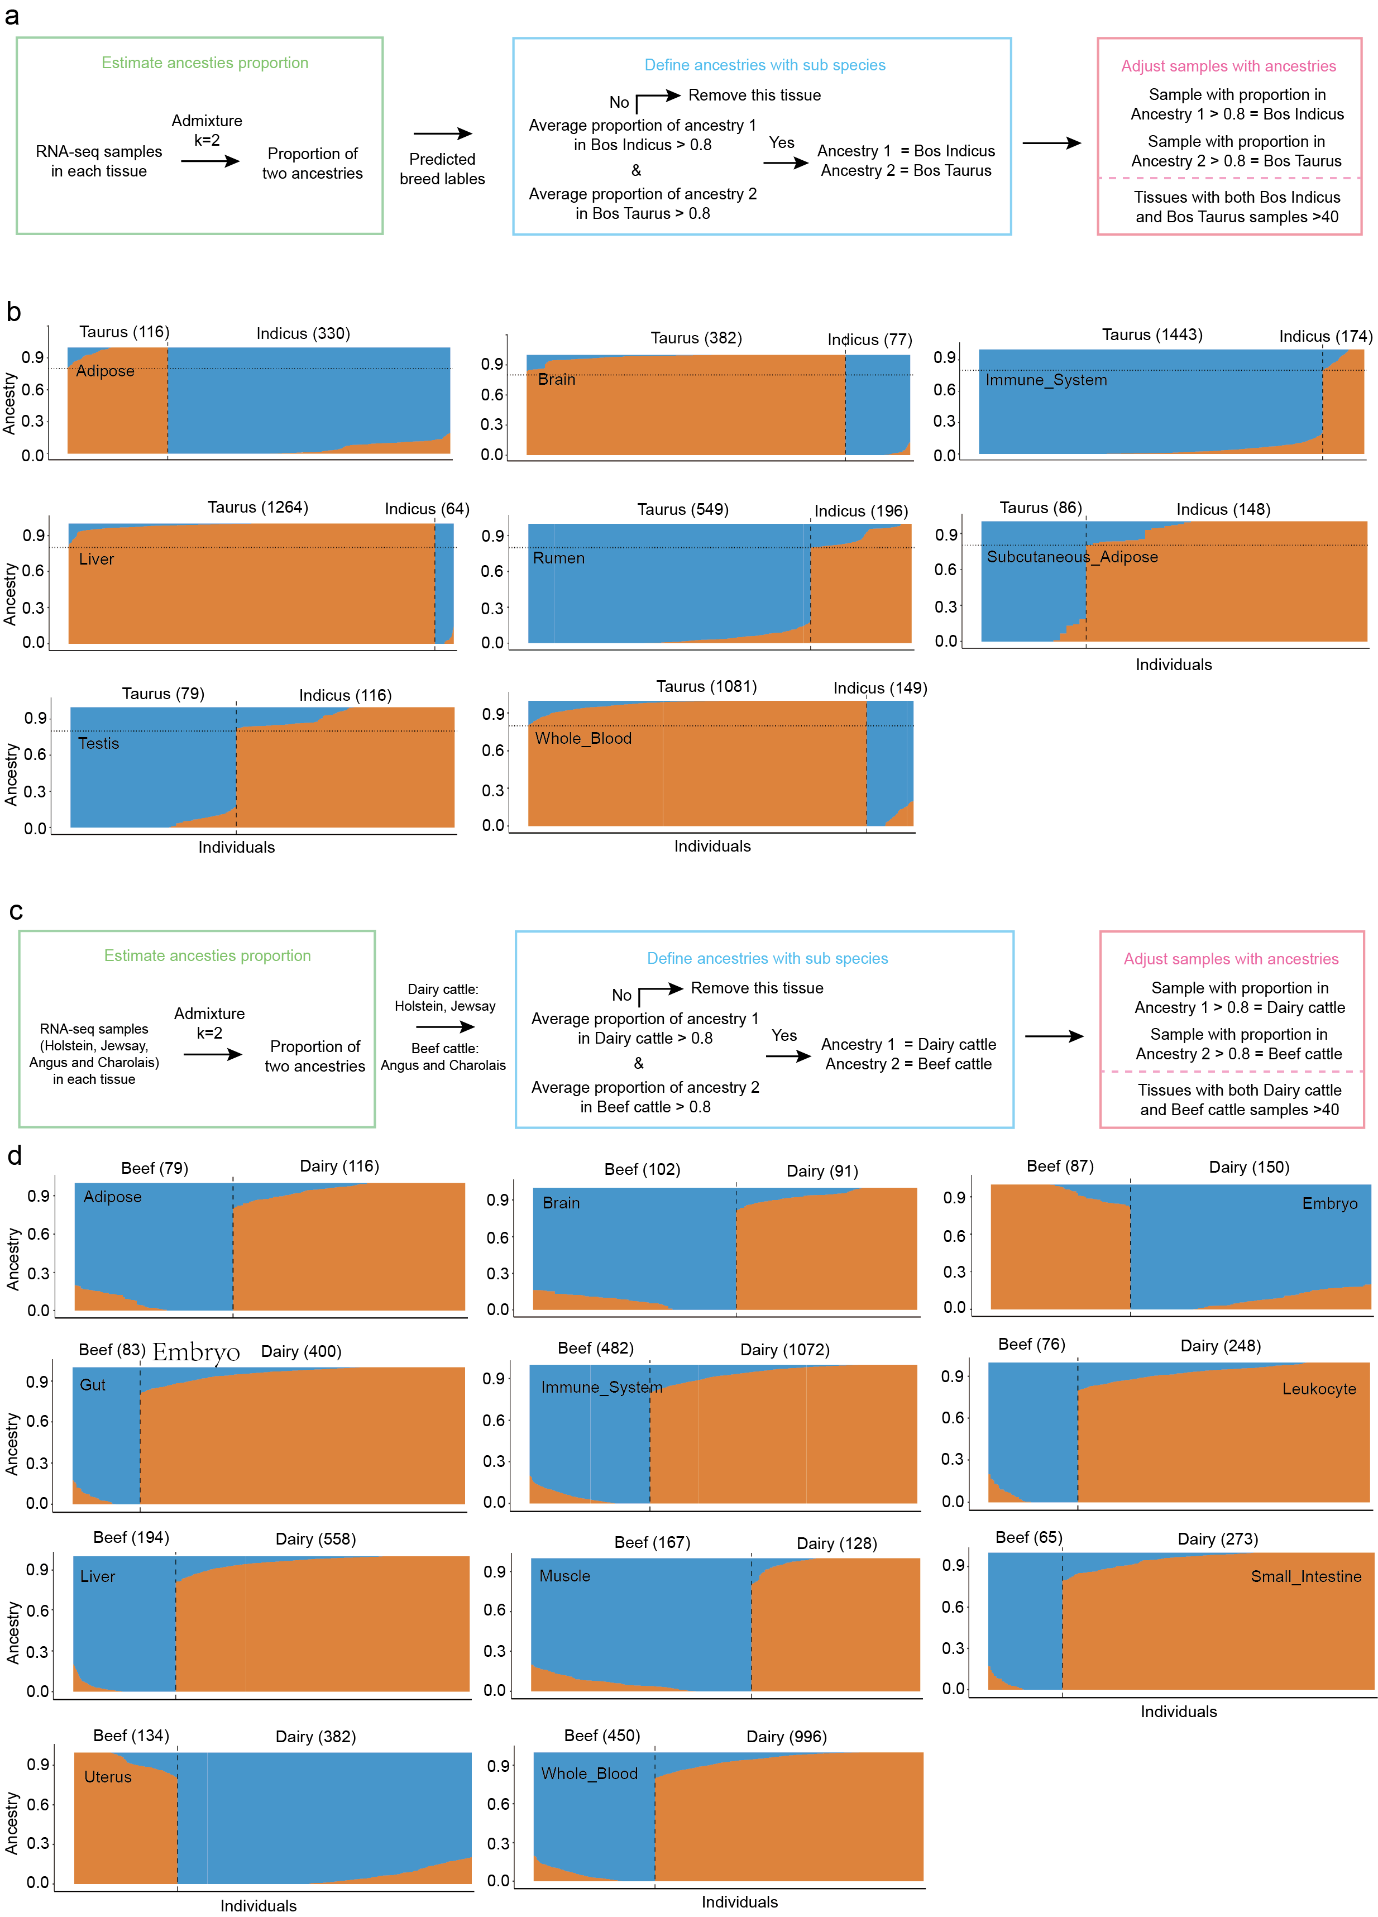


**Supplementary Fig. 15 | a,** Workflow for dividing individuals into *Bos Taurus* and *Bos Indicus*. **b**, Adjusted ancestry profiles between *Bos Taurus* and *Bos Indicus* estimated using ADMIXTURE (v1.3.0), considering ancestry components from K = 2. **c,** Workflow for dividing individuals into dairy cattle and beef cattle. **d**, Adjusted ancestry profiles between dairy cattle and beef cattle estimated using ADMIXTURE (v1.3.0), considering ancestry components from K = 2.


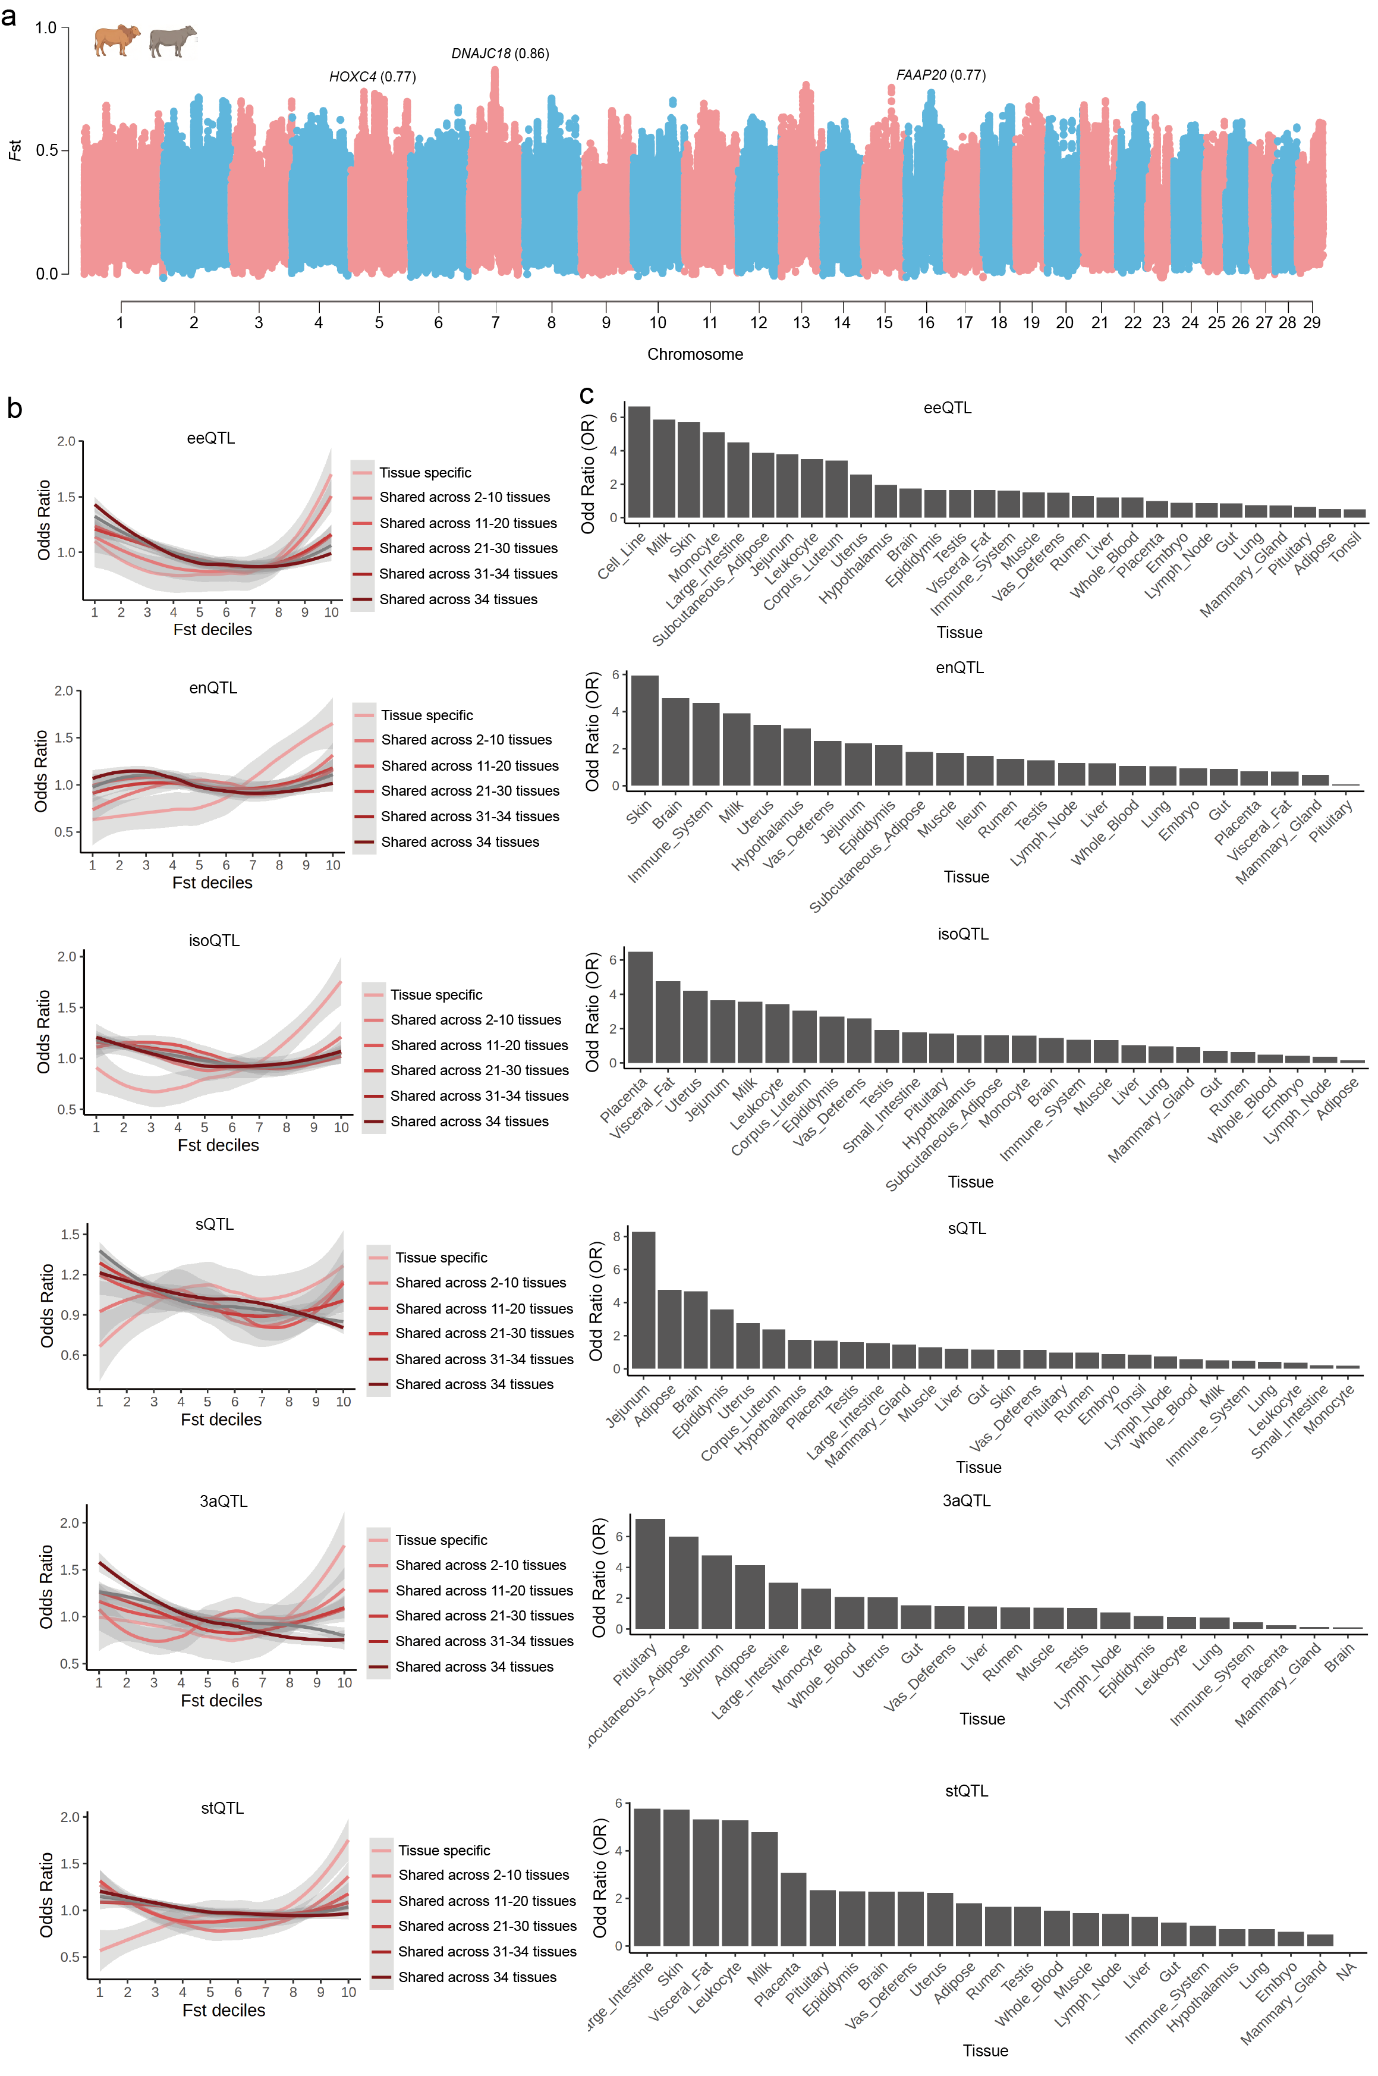


**Supplementary Fig. 16 | a,** Genome-wide *F*ST distribution across 248,690 genomic regions between *Bos Taurus* and *Bos Indicus*. Genes overlapping with the top 10% *F*ST regions (putative targets of strong selection) are highlighted, including previously reported loci such as *DNAJC18*, *HOXC4* and *FAAP20*. **b,** The line plots represent enrichment (odds ratio) of shared and tissue-specific molQTL across 10 FST deciles between *Bos Taurus* and *Bos Indicus*. The lines were fitted by using the geom_smooth function from ggplot2 (v3.3.2) in R (v4.0.2), whereas the bar plots represent enrichment (odds ratio) of tissue-specific eQTL and strongly selected regions (top 5% FST) between *Bos Taurus* and *Bos Indicus* across 35 tissues.


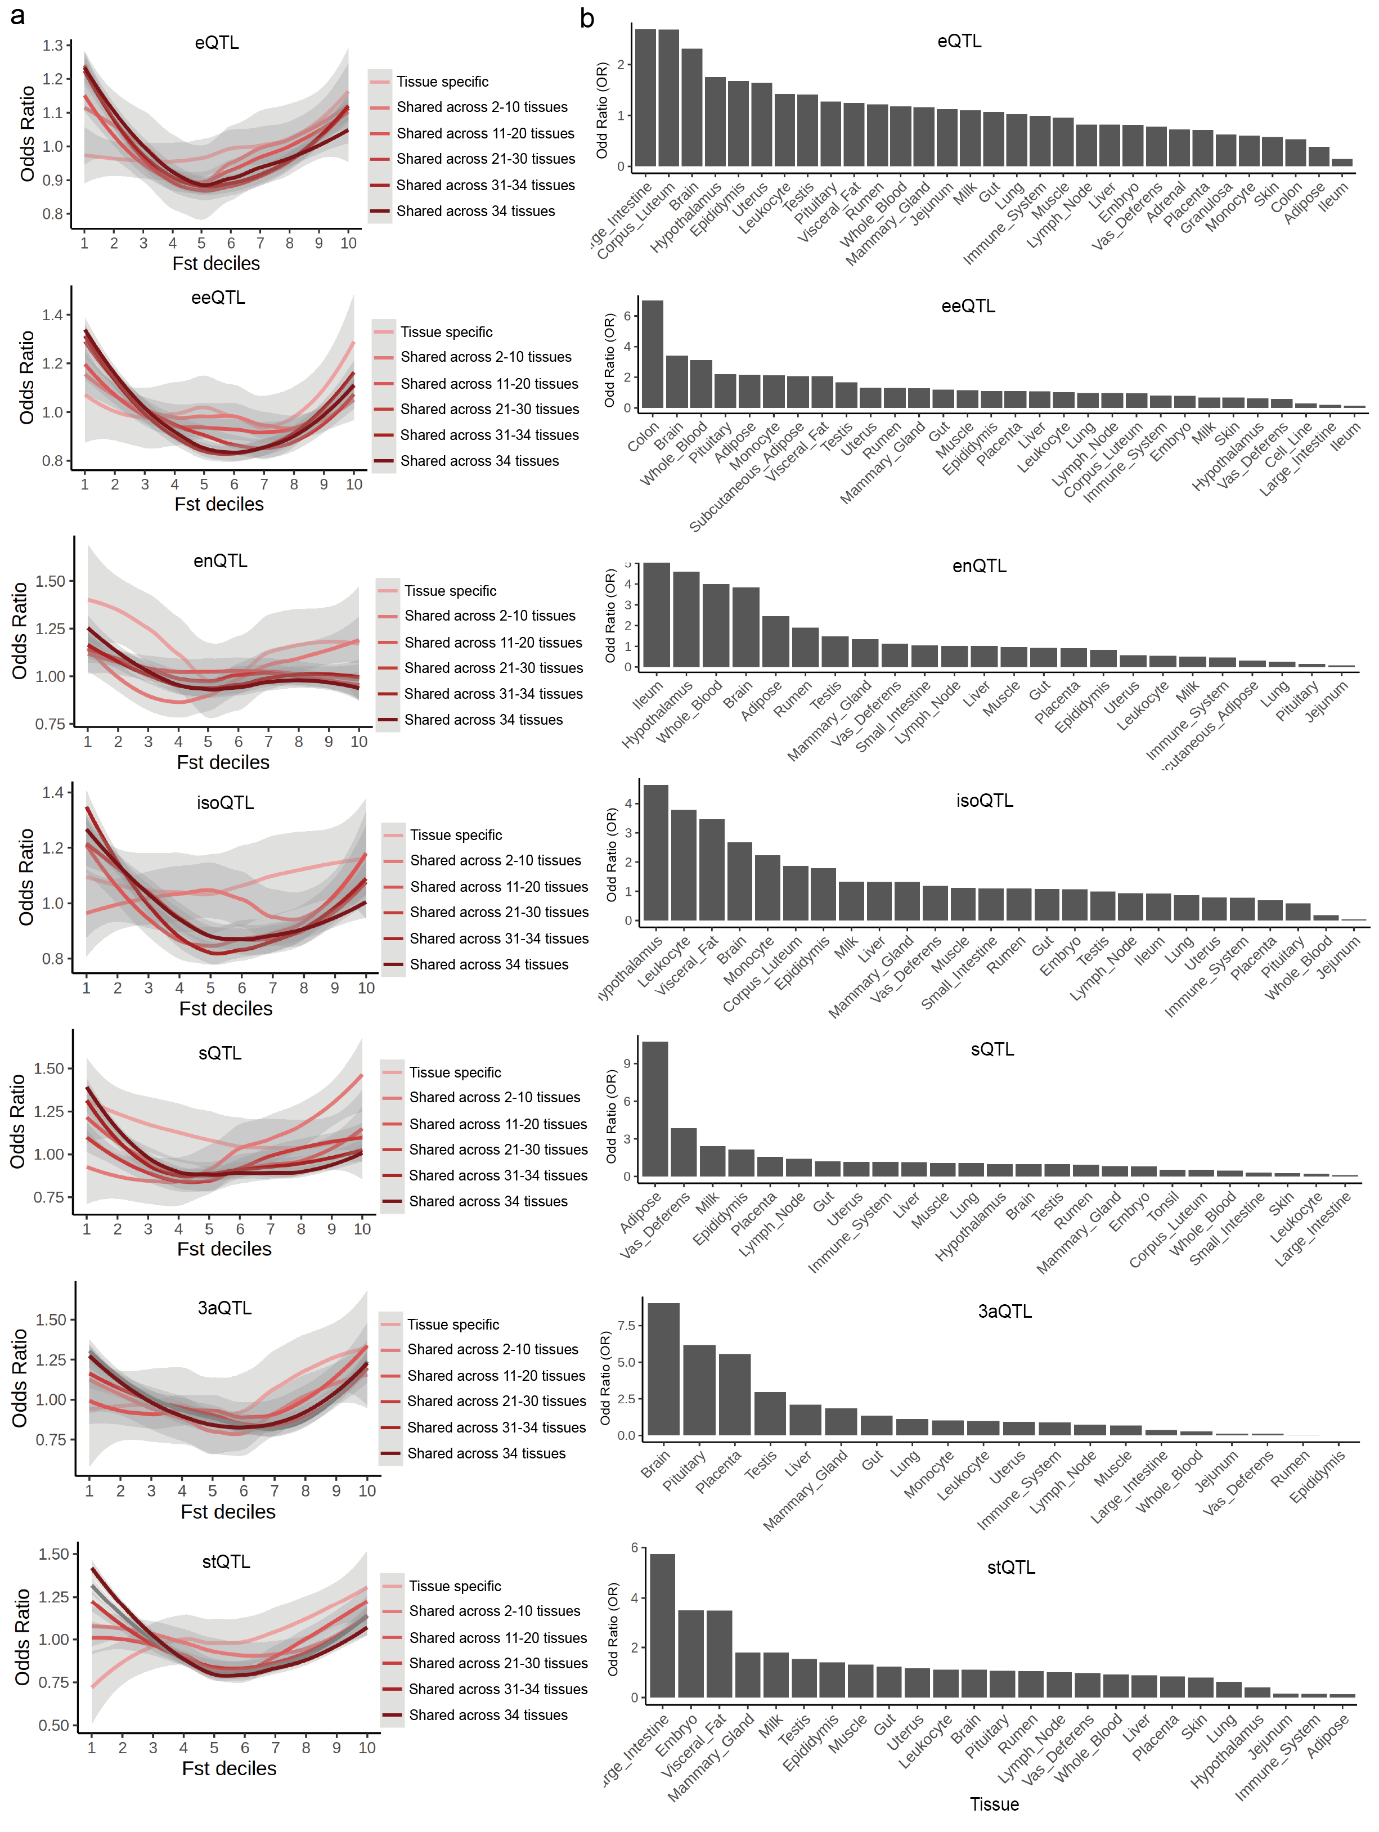


**Supplementary Fig. 17 | a,** Enrichment (odds ratio) of shared and tissue-specific molQTL across 10 FST deciles between dairy cattle and beef cattle. The lines were fitted by using the geom_smooth function from ggplot2 (v3.3.2) in R (v4.0.2). **b,** Enrichment (odds ratio) of tissue-specific molQTL and strongly selected regions (top 5% FST) between dairy cattle and beef cattle across 35 tissues.


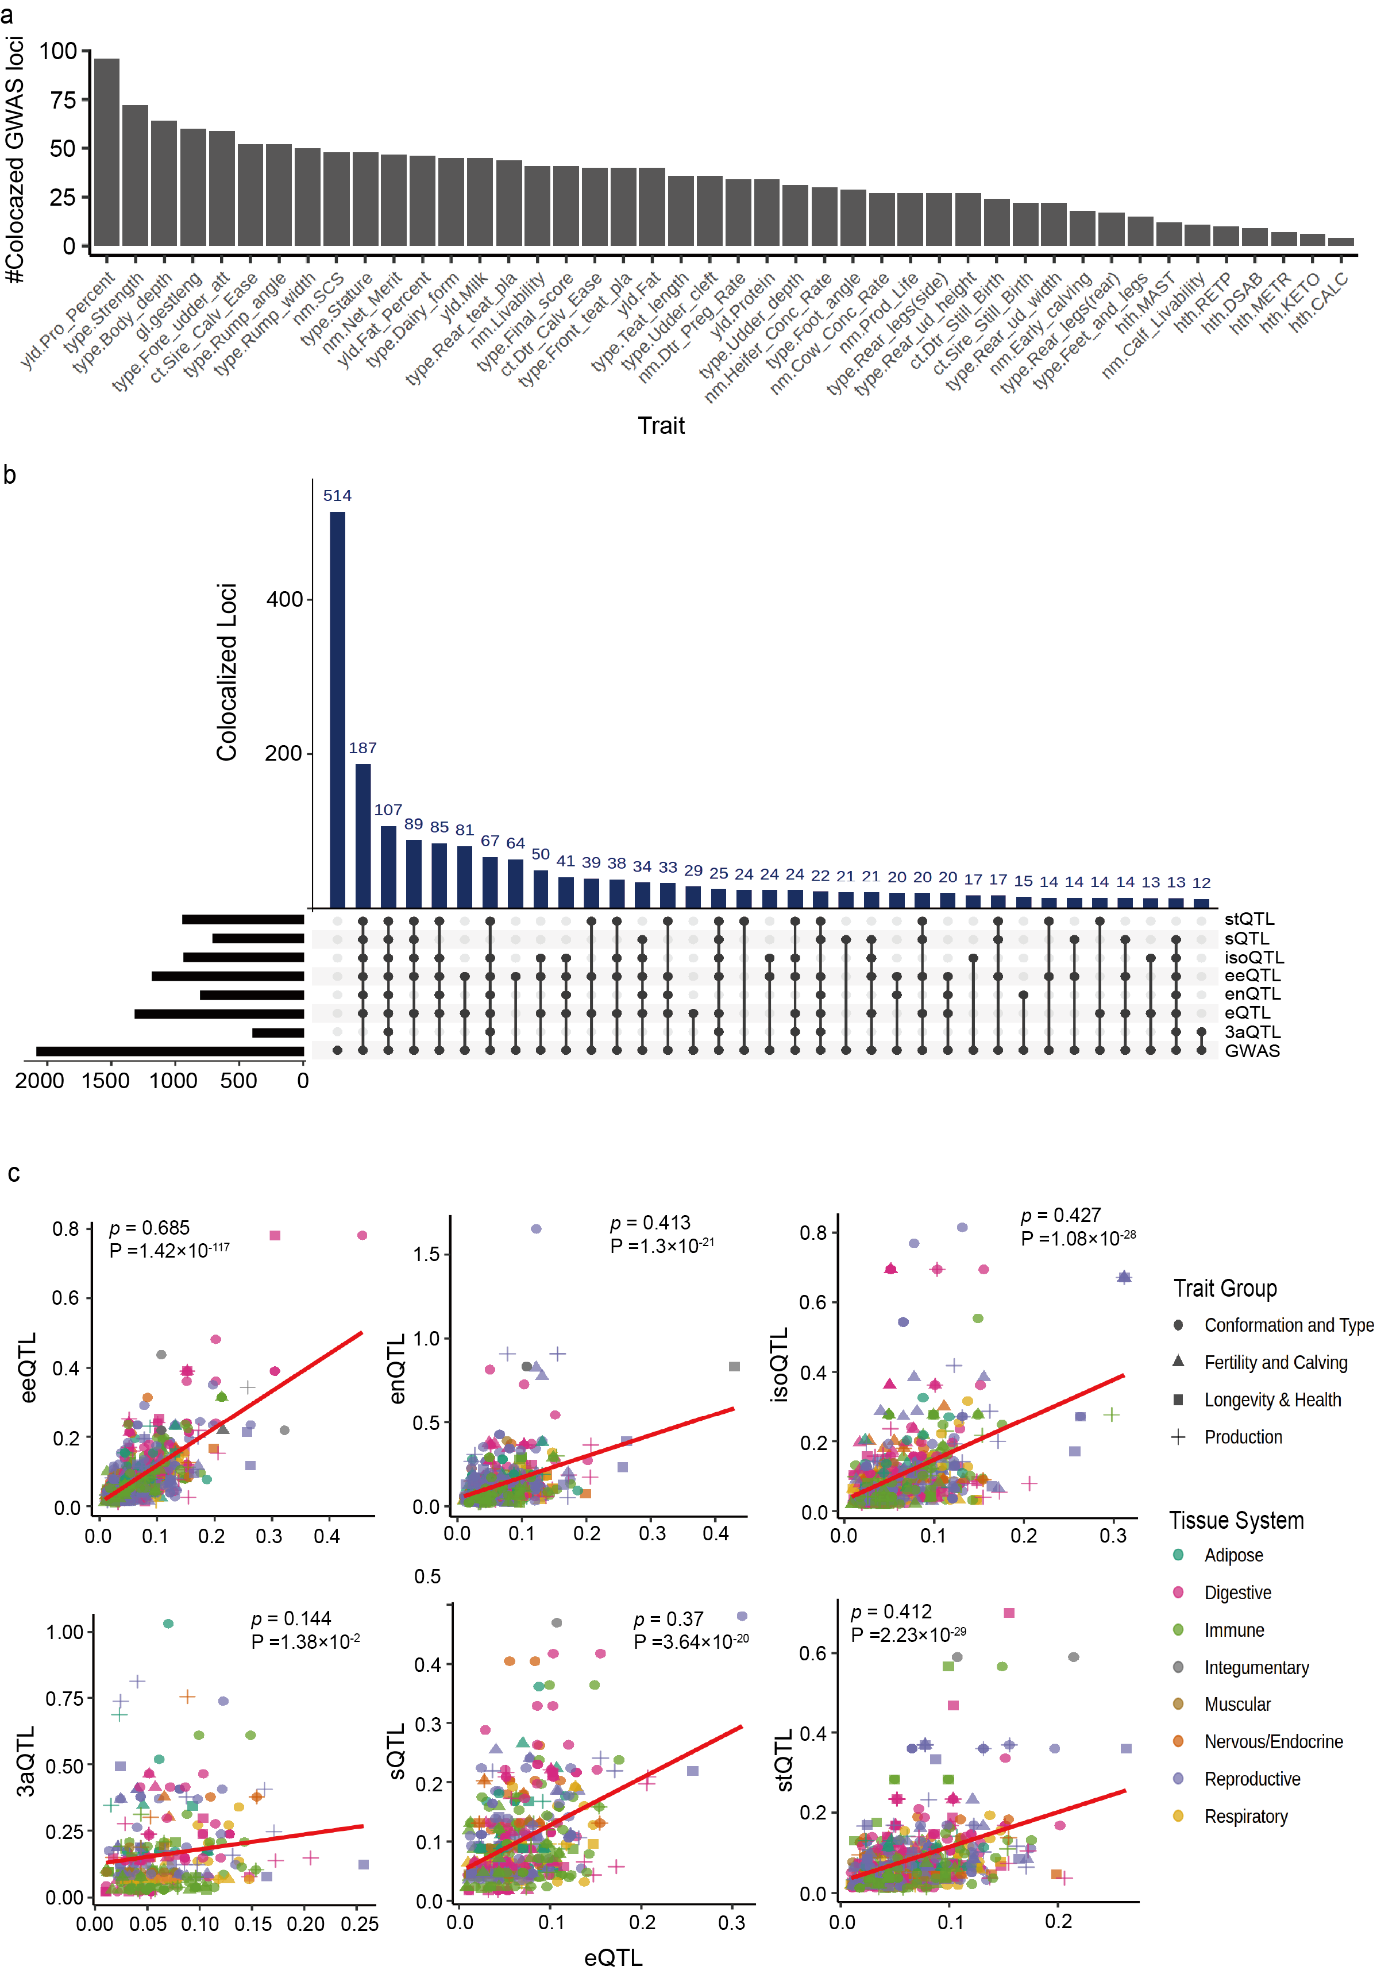


**Supplementary Fig. 18 | a,** Numbers of colocalized GWAS loci within each trait. **b,** Numbers of colocalized GWAS loci by seven molQTL. Each blue bar represents a combination of different molQTL. **c,** Spearman’s correlation of adjusted counts of colocalized molGenes between eQTL and each of other six molQTL across 44 complexs and 35 tissues.


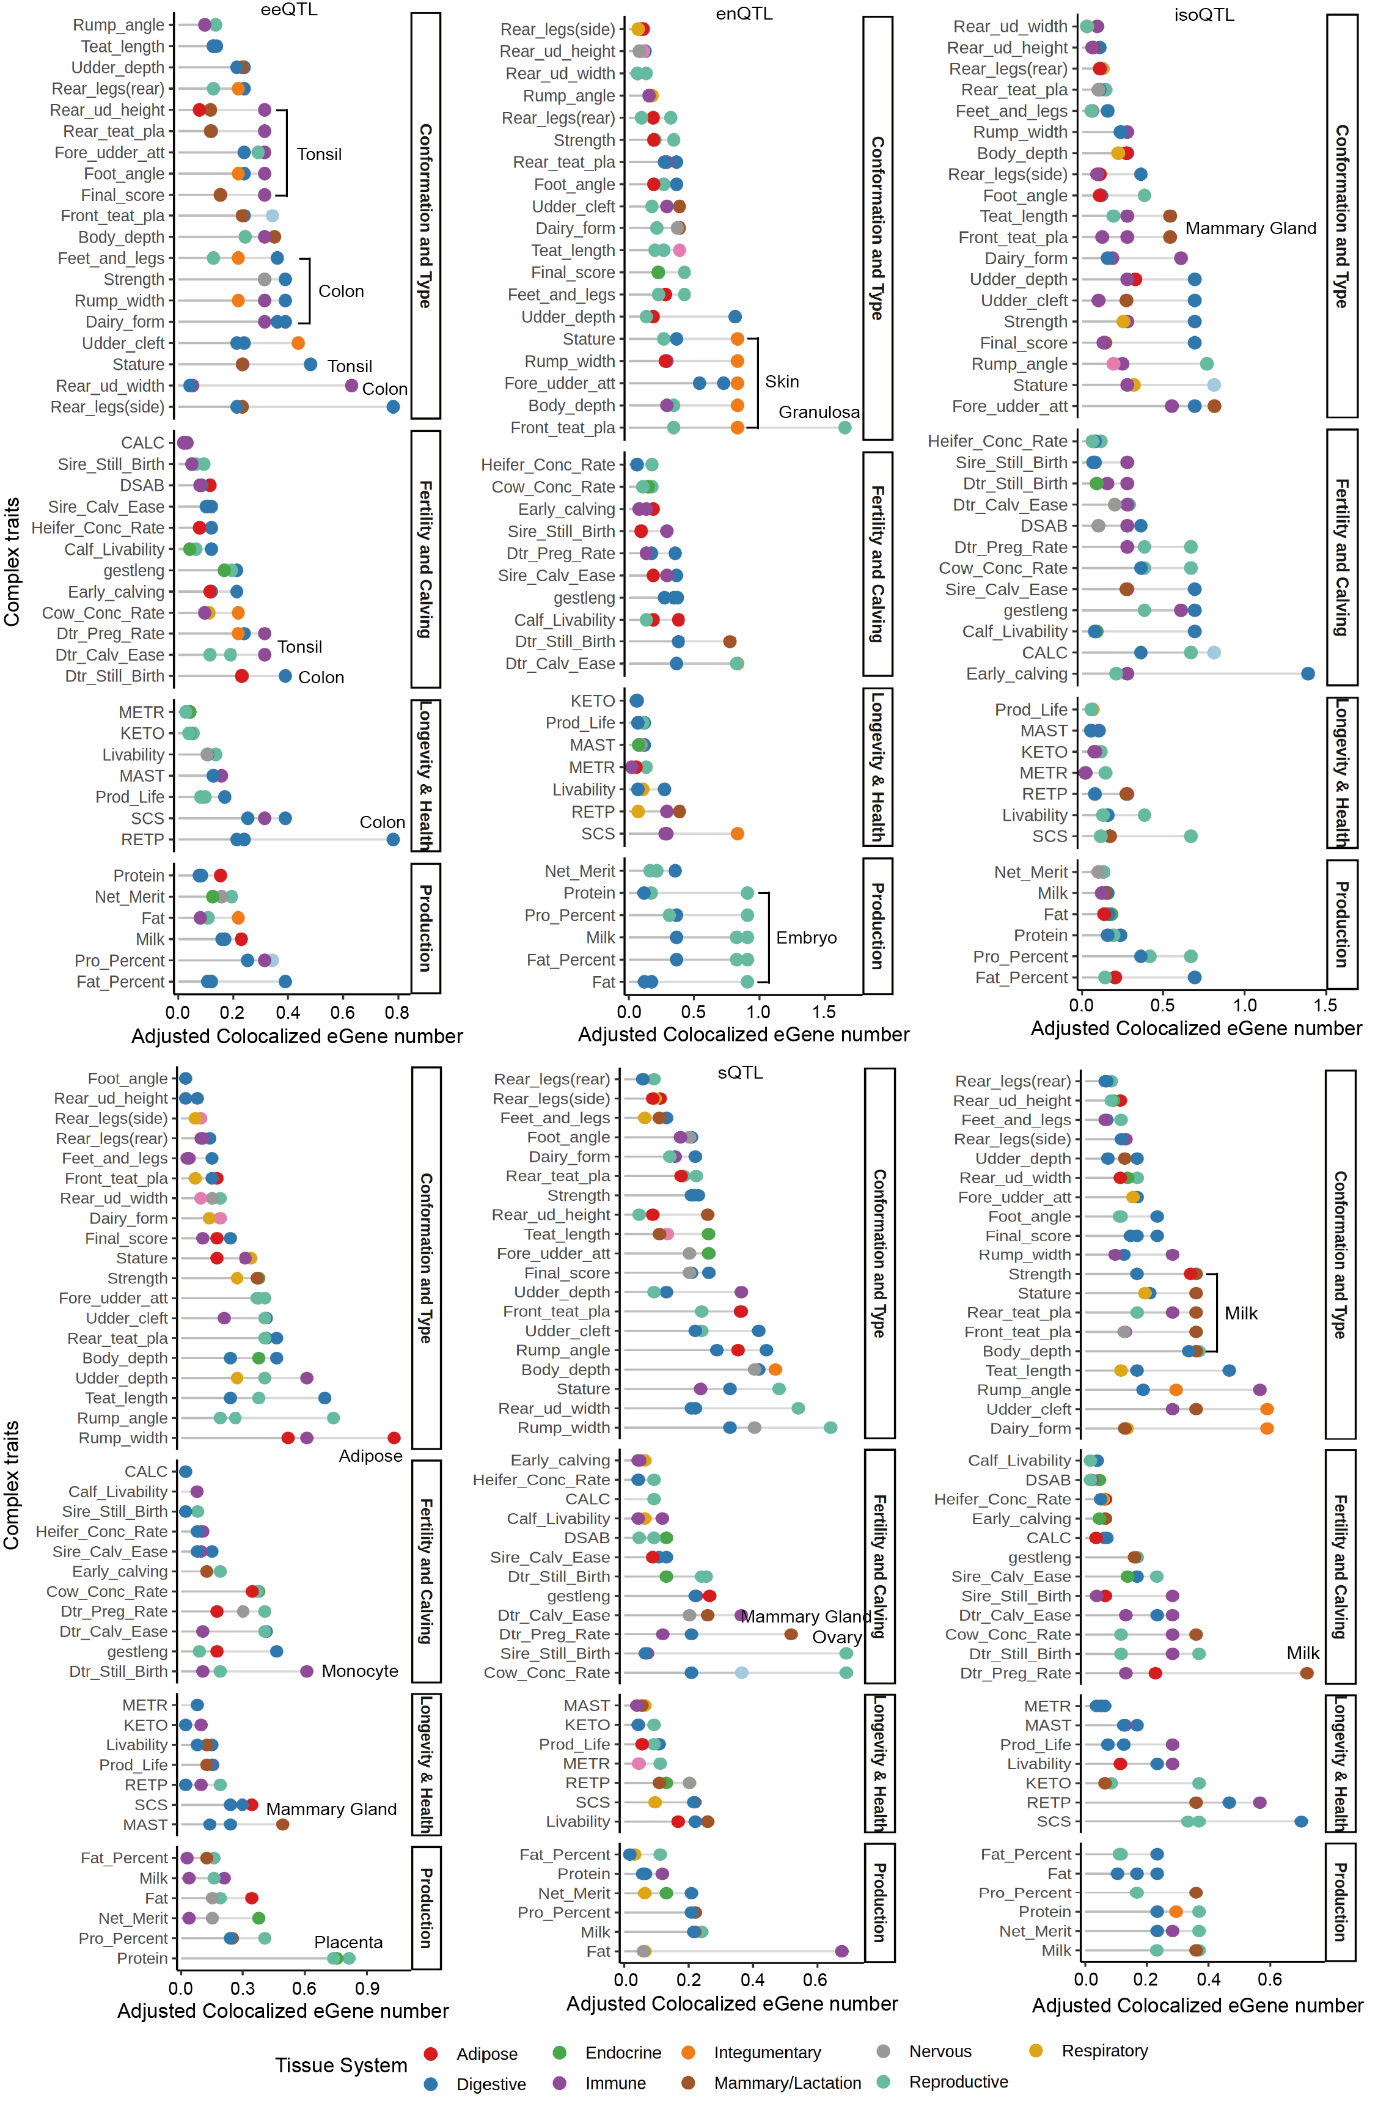


**Supplementary Fig. 19 |** Corrected colocalized molGene counts (PP.H4 > 0.8) between each tissue and each complex trait in six types of molQTL results. Colocalized molGene counts were corrected by detected molGene counts.


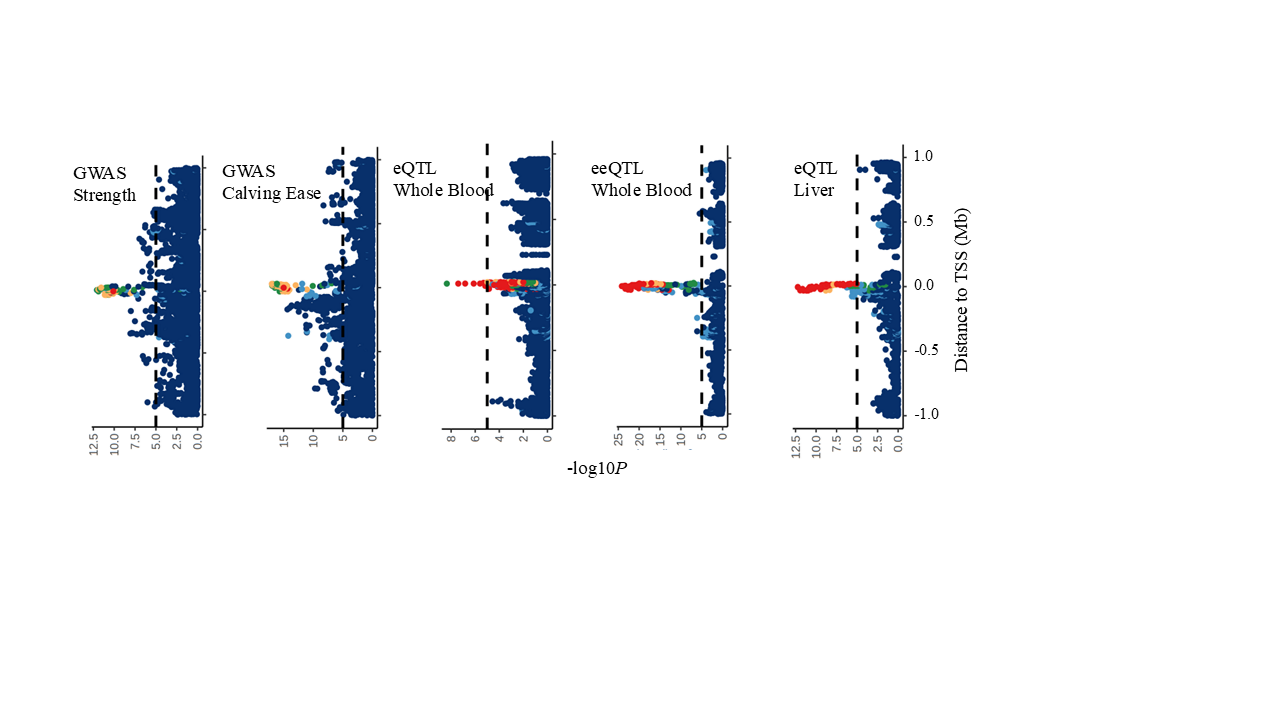


**Supplementary Fig. 20 |** Manhattan plots showing the -log₁₀(p) distribution of the association signal between pleiotropic GWAS loci and molQTL for body strength and calving ease (GWAS) with eQTL and eeQTL in whole blood and liver across genetic variants within the locus of *LSP1*. Variants are colored according to their linkage disequilibrium (LD, r²) with the lead SNP.


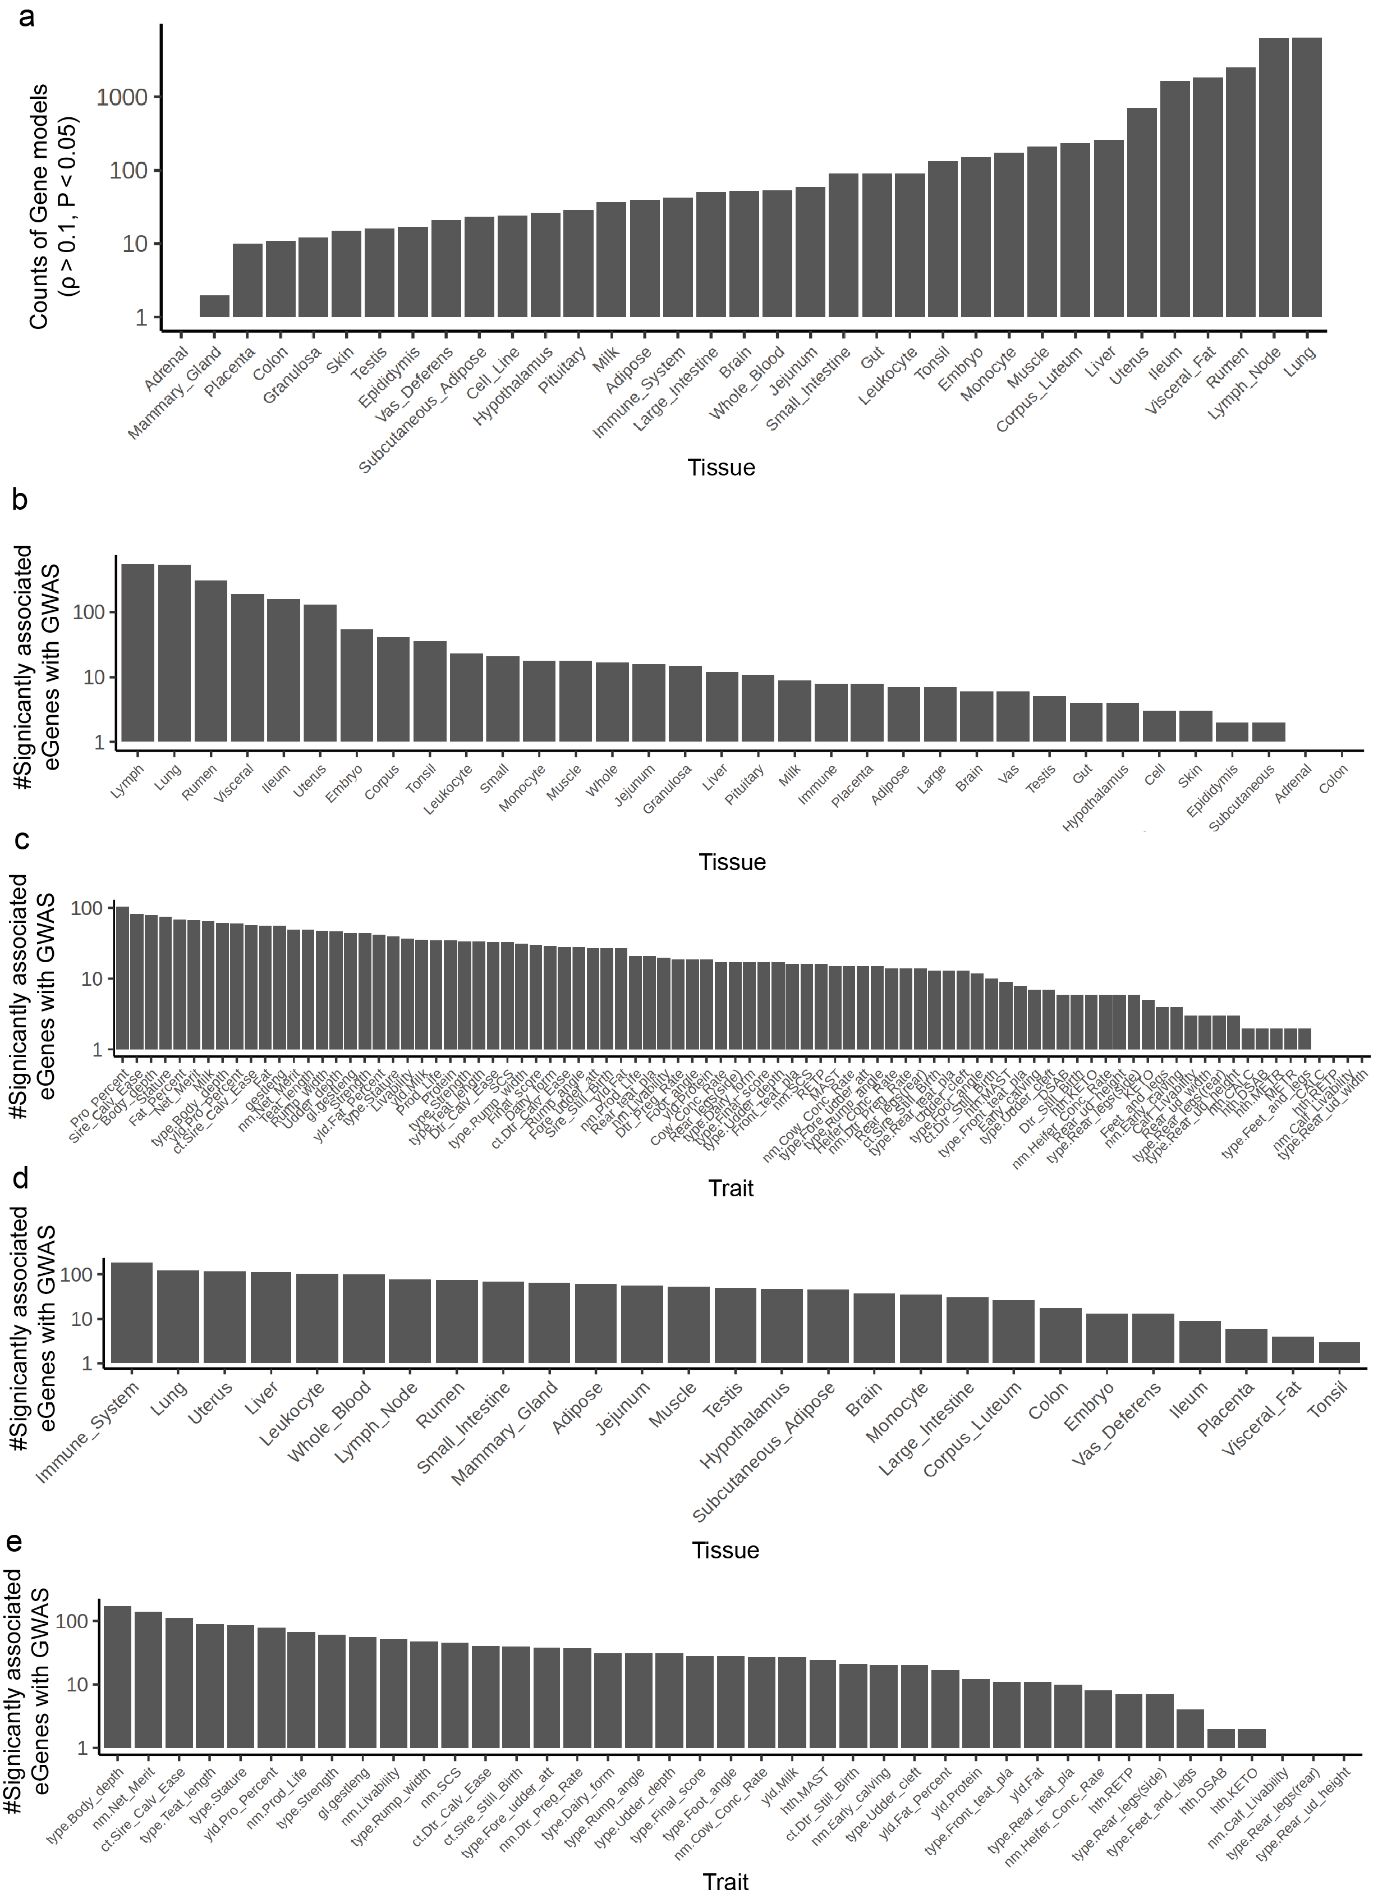


**Supplementary Fig. 21 | a,** Counts of predictive tissue-gene models with cross-vali dated correlation ρ > 0.1 and prediction performance *P* < 0.05 across 35 tissues. **b,** Counts of significant tissue-gene-trait trios (FDR < 0.05) across 35 tissues in TWAS analysis. **c,** Counts of significant tissue-gene-trait trios (FDR < 0.05) across 44 complex traits in TWAS analysis. **d,** Counts of significant tissue-gene-trait trios (FDR < 0.05) across 35 tissues in SMR analysis. **e,** Counts of significant tissue-gene-trait trios (FDR < 0.05) across 44 complex traits in SMR analysis.


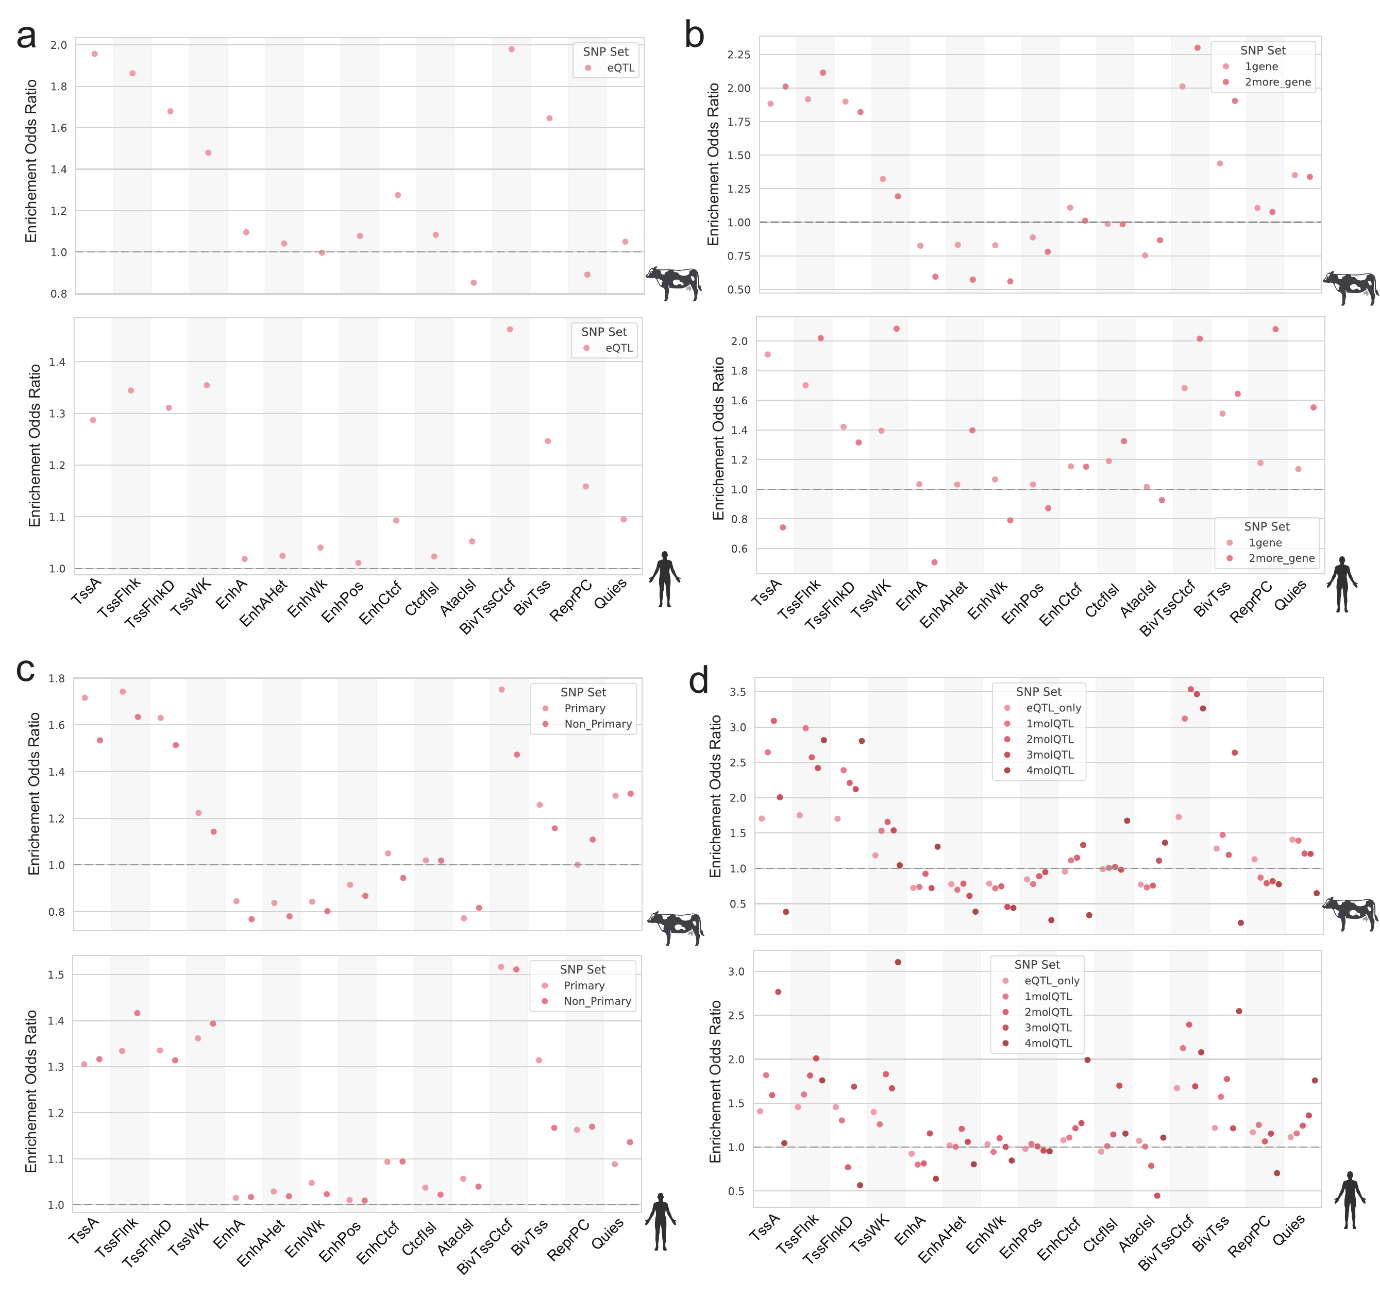


**Supplementary Fig. 22 | a,** Enrichment of all cattle eQTL across cattle FAANG regulatory annotations and, after projection to the human genome, across ENCODE regulatory annotations. **b,** Comparison of enrichment patterns for eQTL associated with a single gene versus eQTL associated with multiple genes in cattle FAANG annotations and, after liftOver, in human ENCODE annotations. **c,** Comparison of enrichment for primary QTL and non-primary QTLs in cattle FAANG annotations and, after liftOver, in human ENCODE annotations. **d,** Comparison of enrichment for eQTL-only variants versus pleiotropic QTL affecting multiple molecular phenotypes in cattle FAANG annotations and, after liftOver, in human ENCODE annotations

**Supplementary References**

1. Coca, A. *et al.* ASPERA: A Simulated Environment to Evaluate Planning for Complex Action Execution. 25399-25434 (Association for Computational Linguistics, Vienna, Austria, 2025).

2. Yu, G. Thirteen years of clusterProfiler. *Innovation (Camb)* **5**, 100722 (2024).

3. Antonio P. Camargo, Adrielle A. Vasconcelos, Mateus B. Fiamenghi, Gonçalo A. G. Pereira & Marcelo F. Carazzolle. tspex: a tissue-specificity calculator for gene expression data. *Research Square* (2020).

4. Li, Y., Ge, X., Peng, F., Li, W. & Li, J.J. Exaggerated false positives by popular differential expression methods when analyzing human population samples. *Genome Biology* **23**, 79 (2022).

5. Yu, G. Thirteen years of clusterProfiler. *The Innovation* **5**, 100722 (2024).

6. Gong, M. *et al.* A multi-tissue atlas of genetic regulatory effects in sheep. *bioRxiv*, 2025.11.03.686346 (2025).

7. Rubinacci, S., Hofmeister, R.J., Sousa da Mota, B. & Delaneau, O. Imputation of low-coverage sequencing data from 150,119 UK Biobank genomes. *Nature Genetics* **55**, 1088-1090 (2023).

8. Zhao, P. The pangenome graphs and SNP-SV joint reference panel in cattle. (2024).

9. Purcell, S. *et al.* PLINK: a tool set for whole-genome association and population-based linkage analyses. *Am J Hum Genet* **81**, 559-75 (2007).

10. Kim, T.A.-O.X. Understanding one-way ANOVA using conceptual figures.

11. McHugh, M.L. The chi-square test of independence.

12. Sperandei, S. Understanding logistic regression analysis.

13. Wang, R. AdaBoost for Feature Selection, Classification and Its Relation with SVM, A Review. *Physics Procedia* **25**, 800-807 (2012).

14. González, S., García, S., Del Ser, J., Rokach, L. & Herrera, F. A practical tutorial on bagging and boosting based ensembles for machine learning: Algorithms, software tools, performance study, practical perspectives and opportunities. *Information Fusion* **64**, 205-237 (2020).

15. Song, Y.Y. & Lu, Y. Decision tree methods: applications for classification and prediction.

16. Geurts, P., Ernst, D. & Wehenkel, L. Extremely randomized trees. *Machine Learning* **63**, 3-42 (2006).

17. Petschke, D. & Staab, T.E.M. A supervised machine learning approach using naive Gaussian Bayes classification for shape-sensitive detector pulse discrimination in positron annihilation lifetime spectroscopy (PALS). *Nuclear Instruments and Methods in Physics Research Section A: Accelerators, Spectrometers, Detectors and Associated Equipment* **947**, 162742 (2019).

18. Natekin, A. & Knoll, A. Gradient boosting machines, a tutorial.

19. Zhang, Z. Introduction to machine learning: k-nearest neighbors.

20. Multilayer Perceptron (in Neural Networks). in *Machine Learning for Industrial Applications* 51-61 (2025).

21. Cutler, A. Random Forests. in *Wiley StatsRef: Statistics Reference Online* (2014).

22. Khatun, R. *et al.* Cancer Classification Utilizing Voting Classifier with Ensemble Feature Selection Method and Transcriptomic Data. LID - 10.3390/genes14091802 [doi] LID - 1802.

23. Murty, M.N. & Raghava, R. Linear Support Vector Machines. in *Support Vector Machines and Perceptrons: Learning, Optimization, Classification, and Application to Social Networks* (eds. Murty, M.N. & Raghava, R.) 41-56 (Springer International Publishing, Cham, 2016).

24. Yang, J., Lee, S.H., Goddard, M.E. & Visscher, P.M. GCTA: a tool for genome-wide complex trait analysis. *Am J Hum Genet* **88**, 76-82 (2011).

25. Zhao, C. *et al.* Breed identification using breed-informative SNPs and machine learning based on whole genome sequence data and SNP chip data.

26. Miao, J. *et al.* A web tool for the global identification of pig breeds.

27. Fang, L. *et al.* The Farm Animal Genotype–Tissue Expression (FarmGTEx) Project. *Nature Genetics* **57**, 786-796 (2025).

28. Liu, S. *et al.* A multi-tissue atlas of regulatory variants in cattle. *Nature Genetics* **54**, 1438-1447 (2022).

29. Teng, J. *et al.* A compendium of genetic regulatory effects across pig tissues. *Nature Genetics* **56**, 112-123 (2024).

30. Guan, D. *et al.* Genetic regulation of gene expression across multiple tissues in chickens. *Nature Genetics* **57**, 1298-1308 (2025).

31. Teng, J. *et al.* OmiGA for ultra-efficient molecular quantitative trait loci mapping. *Nature Communications* (2026).

32. Gilmour, A.R., Thompson, R. & Cullis, B.R. Average information REML: An efficient algorithm for variance parameter estimation in linear mixed models. *Biometrics* **51**, 1440-1450 (1995).

33. Storey, J.D. & Tibshirani, R. Statistical significance for genomewide studies. *Proceedings of the National Academy of Sciences* **100**, 9440-9445 (2003).

34. Robinson, J.D.S.a.A.J.B.a.A.D.a.D. qvalue: Q-value estimation for false discovery rate control. (2025).

35. Castel, S.E., Mohammadi, P., Chung, W.K., Shen, Y. & Lappalainen, T. Rare variant phasing and haplotypic expression from RNA sequencing with phASER. *Nat Commun* **7**, 12817 (2016).

36. Mohammadi, P., Castel, S.E., Brown, A.A. & Lappalainen, T. Quantifying the regulatory effect size of cis-acting genetic variation using allelic fold change.

37. Zhou, H.J., Ge, X. & Li, J.J. ClipperQTL: ultrafast and powerful eGene identification method. *Genome Biology* **26**, 207 (2025).

38. Liu, Y. *et al.* ACAT: A Fast and Powerful p Value Combination Method for Rare-Variant Analysis in Sequencing Studies.

39. Barbeira, A.N. *et al.* Exploring the phenotypic consequences of tissue specific gene expression variation inferred from GWAS summary statistics. *Nature Communications* **9**, 1825 (2018).

40. Barbeira, A. *et al.* MetaXcan: Summary Statistics Based Gene-Level Association Method Infers Accurate PrediXcan Results. *bioRxiv*, 045260 (2016).

41. Zhu, Z. *et al.* Integration of summary data from GWAS and eQTL studies predicts complex trait gene targets.
