# Supplementary material
Source: Research Square preprint supplement (doi:10.21203/rs.3.rs-9166480/v1)
Supplement: Supplementary file 2 [file daa26f515b51cb1ca2c58c97.xlsx]

## Sheet: Supplementary_Table_1
Supplementary Table 1. Download resources of 27,681 public RNA-seq samples
BioSample	BioProject	Release_Date	Source
SAMD00000728	PRJDA72405	2014-06-10	SRA
SAMD00010929	PRJDB2399	2014-05-14	SRA
SAMD00011318	PRJDA72405	2014-05-14	SRA
SAMD00011319	PRJDA72405	2014-05-14	SRA
SAMD00011320	PRJDA72405	2014-05-14	SRA
SAMD00012691	PRJDA72405	2012-11-14	SRA
SAMD00012692	PRJDA72405	2012-11-14	SRA
SAMD00012693	PRJDA72405	2012-11-14	SRA
SAMD00016898	PRJDB2869	2016-02-09	SRA
SAMD00016899	PRJDB2869	2016-02-09	SRA
SAMD00016900	PRJDB2869	2016-02-09	SRA
SAMD00016901	PRJDB2869	2016-02-09	SRA
SAMD00016902	PRJDB2869	2016-02-09	SRA
SAMD00016903	PRJDB2869	2016-02-09	SRA
SAMD00071621	PRJDB5470	2017-02-28	SRA
SAMD00071622	PRJDB5470	2017-02-28	SRA
SAMD00071623	PRJDB5470	2017-02-28	SRA
SAMD00096874	PRJDB6397	2021-10-06	SRA
SAMD00096875	PRJDB6397	2021-10-06	SRA
SAMD00096876	PRJDB6397	2021-10-06	SRA
SAMD00106906	PRJDB6581	2019-12-03	SRA
SAMD00106907	PRJDB6581	2019-12-03	SRA
SAMD00106908	PRJDB6581	2019-12-03	SRA
SAMD00106909	PRJDB6581	2019-12-03	SRA
SAMD00112301	PRJDB6759	2020-02-08	SRA
SAMD00112302	PRJDB6759	2020-02-08	SRA
SAMD00112303	PRJDB6759	2020-02-08	SRA
SAMD00112304	PRJDB6759	2020-02-08	SRA
SAMD00112305	PRJDB6759	2020-02-08	SRA
SAMD00112306	PRJDB6759	2020-02-08	SRA
SAMD00112307	PRJDB6759	2020-02-08	SRA
SAMD00112308	PRJDB6759	2020-02-08	SRA
SAMD00112309	PRJDB6759	2020-02-08	SRA
SAMD00112310	PRJDB6759	2020-02-08	SRA
SAMD00112311	PRJDB6759	2020-02-08	SRA
SAMD00112312	PRJDB6759	2020-02-08	SRA
SAMD00156667	PRJDB7879	2020-03-19	SRA
SAMD00156668	PRJDB7879	2020-03-19	SRA
SAMD00156669	PRJDB7879	2020-03-19	SRA
SAMD00156670	PRJDB7879	2020-03-19	SRA
SAMD00156671	PRJDB7879	2020-03-19	SRA
SAMD00156672	PRJDB7879	2020-03-19	SRA
SAMD00166949	PRJDB8196	2020-04-14	SRA
SAMD00166950	PRJDB8196	2020-04-14	SRA
SAMD00166951	PRJDB8196	2020-04-14	SRA
SAMD00166952	PRJDB8196	2020-04-14	SRA
SAMD00166953	PRJDB8196	2020-04-14	SRA
SAMD00166954	PRJDB8196	2020-04-14	SRA
SAMD00166955	PRJDB8196	2020-04-14	SRA
SAMD00166956	PRJDB8196	2020-04-14	SRA
SAMD00166957	PRJDB8196	2020-04-14	SRA
SAMD00166958	PRJDB8196	2020-04-14	SRA
SAMD00166959	PRJDB8196	2020-04-14	SRA
SAMD00166960	PRJDB8196	2020-04-14	SRA
SAMD00166961	PRJDB8196	2020-04-14	SRA
SAMD00166962	PRJDB8196	2020-04-14	SRA
SAMD00166963	PRJDB8196	2020-04-14	SRA
SAMD00178009	PRJDB8507	2019-11-08	SRA
SAMD00178010	PRJDB8507	2019-11-08	SRA
SAMD00178011	PRJDB8507	2019-11-08	SRA
SAMD00178012	PRJDB8507	2019-11-08	SRA
SAMD00178013	PRJDB8507	2019-11-08	SRA
SAMD00178014	PRJDB8507	2019-11-08	SRA
SAMD00209823	PRJDB9442	2021-10-16	SRA
SAMD00209824	PRJDB9442	2021-10-16	SRA
SAMD00209825	PRJDB9442	2021-10-16	SRA
SAMD00209826	PRJDB9442	2021-10-16	SRA
SAMD00209827	PRJDB9442	2021-10-16	SRA
SAMD00209828	PRJDB9442	2021-10-16	SRA
SAMD00209829	PRJDB9442	2021-10-16	SRA
SAMD00209830	PRJDB9442	2021-10-16	SRA
SAMD00209831	PRJDB9442	2021-10-16	SRA
SAMD00209832	PRJDB9442	2021-10-16	SRA
SAMD00232341	PRJDB10062	2022-06-11	SRA
SAMD00232342	PRJDB10062	2022-06-11	SRA
SAMD00239400	PRJDB10383	2021-07-02	SRA
SAMD00239401	PRJDB10383	2021-07-02	SRA
SAMD00239402	PRJDB10383	2021-07-02	SRA
SAMD00239403	PRJDB10383	2021-07-02	SRA
SAMD00239404	PRJDB10383	2021-07-02	SRA
SAMD00239405	PRJDB10383	2021-07-02	SRA
SAMD00259528	PRJDB10813	2022-10-25	SRA
SAMD00259529	PRJDB10813	2022-10-25	SRA
SAMD00259530	PRJDB10813	2022-10-25	SRA
SAMD00259531	PRJDB10813	2022-10-25	SRA
SAMD00259532	PRJDB10813	2022-10-25	SRA
SAMD00259533	PRJDB10813	2022-10-25	SRA
SAMD00282838	PRJDB11284	2023-02-07	SRA
SAMD00282839	PRJDB11284	2023-02-07	SRA
SAMD00282840	PRJDB11284	2023-02-07	SRA
SAMD00282841	PRJDB11284	2023-02-07	SRA
SAMD00282842	PRJDB11284	2023-02-07	SRA
SAMD00282843	PRJDB11284	2023-02-07	SRA
SAMD00287791	PRJDB11395	2023-03-16	SRA
SAMD00287792	PRJDB11395	2023-03-16	SRA
SAMD00287793	PRJDB11395	2023-03-16	SRA
SAMD00287794	PRJDB11395	2023-03-16	SRA
SAMD00287795	PRJDB11395	2023-03-16	SRA
SAMD00287796	PRJDB11395	2023-03-16	SRA
SAMD00287797	PRJDB11395	2023-03-16	SRA
SAMD00287798	PRJDB11395	2023-03-16	SRA
SAMD00287799	PRJDB11395	2023-03-16	SRA
SAMD00287800	PRJDB11395	2023-03-16	SRA
SAMD00287801	PRJDB11395	2023-03-16	SRA
SAMD00287802	PRJDB11395	2023-03-16	SRA
SAMD00389778	PRJDB11941	2022-06-14	SRA
SAMD00389779	PRJDB11941	2022-06-14	SRA
SAMD00389780	PRJDB11941	2022-06-14	SRA
SAMD00389781	PRJDB11941	2022-06-14	SRA
SAMD00389782	PRJDB11941	2022-06-14	SRA
SAMD00389783	PRJDB11941	2022-06-14	SRA
SAMD00453086	PRJDB13377	2022-04-19	SRA
SAMD00453087	PRJDB13377	2022-04-19	SRA
SAMD00453088	PRJDB13377	2022-04-19	SRA
SAMD00453089	PRJDB13377	2022-04-19	SRA
SAMD00453090	PRJDB13377	2022-04-19	SRA
SAMD00453091	PRJDB13377	2022-04-19	SRA
SAMD00453092	PRJDB13377	2022-04-19	SRA
SAMD00453093	PRJDB13377	2022-04-19	SRA
SAMD00453094	PRJDB13377	2022-04-19	SRA
SAMD00532378	PRJDB14299	2023-03-31	SRA
SAMD00532379	PRJDB14299	2023-03-31	SRA
SAMD00549717	PRJDB14589	2022-10-17	SRA
SAMD00549718	PRJDB14589	2022-10-17	SRA
SAMD00549719	PRJDB14589	2022-10-17	SRA
SAMD00549720	PRJDB14589	2022-10-17	SRA
SAMD00549721	PRJDB14589	2022-10-17	SRA
SAMD00549722	PRJDB14589	2022-10-17	SRA
SAMEA103988700	PRJEB42490	2021-01-31	SRA
SAMEA103989324	PRJEB42490	2021-01-31	SRA
SAMEA103989656	PRJEB27455	2018-07-04	SRA
SAMEA103989694	PRJEB27455	2018-07-04	SRA
SAMEA103989800	PRJEB27455	2018-07-04	SRA
SAMEA103989857	PRJEB42490	2021-01-31	SRA
SAMEA103990241	PRJEB42490	2021-01-31	SRA
SAMEA103990279	PRJEB42490	2021-01-31	SRA
SAMEA103990470	PRJEB42490	2021-01-31	SRA
SAMEA103991310	PRJEB42490	2021-01-31	SRA
SAMEA103991636	PRJEB27455	2018-07-04	SRA
SAMEA103991643	PRJEB42490	2021-01-31	SRA
SAMEA103991676	PRJEB42490	2021-01-31	SRA
SAMEA103991688	PRJEB42490	2021-01-31	SRA
SAMEA103992112	PRJEB42490	2021-01-31	SRA
SAMEA104129619	PRJEB21332	2017-11-28	SRA
SAMEA104129620	PRJEB21332	2017-11-28	SRA
SAMEA104129621	PRJEB21332	2017-11-28	SRA
SAMEA104129622	PRJEB21332	2017-11-28	SRA
SAMEA104129623	PRJEB21332	2017-11-28	SRA
SAMEA104129624	PRJEB21332	2017-11-28	SRA
SAMEA104129625	PRJEB21332	2017-11-28	SRA
SAMEA104129626	PRJEB21332	2017-11-28	SRA
SAMEA104136970	PRJEB21455	2017-08-02	SRA
SAMEA104136971	PRJEB21455	2017-08-02	SRA
SAMEA104136972	PRJEB21455	2017-08-02	SRA
SAMEA104136973	PRJEB21455	2017-08-02	SRA
SAMEA104136974	PRJEB21455	2017-08-02	SRA
SAMEA104136975	PRJEB21455	2017-08-02	SRA
SAMEA104136976	PRJEB21455	2017-08-02	SRA
SAMEA104136977	PRJEB21455	2017-08-02	SRA
SAMEA104136978	PRJEB21455	2017-08-02	SRA
SAMEA104136979	PRJEB21455	2017-08-02	SRA
SAMEA104136980	PRJEB21455	2017-08-02	SRA
SAMEA104136981	PRJEB21455	2017-08-02	SRA
SAMEA104136982	PRJEB21455	2017-08-02	SRA
SAMEA104136983	PRJEB21455	2017-08-02	SRA
SAMEA104136984	PRJEB21455	2017-08-02	SRA
SAMEA104136985	PRJEB21455	2017-08-02	SRA
SAMEA104136986	PRJEB21455	2017-08-02	SRA
SAMEA104136987	PRJEB21455	2017-08-02	SRA
SAMEA104136988	PRJEB21455	2017-08-02	SRA
SAMEA104136989	PRJEB21455	2017-08-02	SRA
SAMEA104136990	PRJEB21455	2017-08-02	SRA
SAMEA104136991	PRJEB21455	2017-08-02	SRA
SAMEA104136992	PRJEB21455	2017-08-02	SRA
SAMEA104136993	PRJEB21455	2017-08-02	SRA
SAMEA104136994	PRJEB21455	2017-08-02	SRA
SAMEA104136995	PRJEB21455	2017-08-02	SRA
SAMEA104136996	PRJEB21455	2017-08-02	SRA
SAMEA104136997	PRJEB21455	2017-08-02	SRA
SAMEA104136998	PRJEB21455	2017-08-02	SRA
SAMEA104136999	PRJEB21455	2017-08-02	SRA
SAMEA104223986	PRJEB22247	2017-10-23	SRA
SAMEA104223987	PRJEB22247	2017-10-23	SRA
SAMEA104223988	PRJEB22247	2017-10-23	SRA
SAMEA104223989	PRJEB22247	2017-10-23	SRA
SAMEA104223990	PRJEB22247	2017-10-23	SRA
SAMEA104223991	PRJEB22247	2017-10-23	SRA
SAMEA104223992	PRJEB22247	2017-10-23	SRA
SAMEA104223993	PRJEB22247	2017-10-23	SRA
SAMEA104223994	PRJEB22247	2017-10-23	SRA
SAMEA104223995	PRJEB22247	2017-10-23	SRA
SAMEA104223996	PRJEB22247	2017-10-23	SRA
SAMEA104223997	PRJEB22247	2017-10-23	SRA
SAMEA104223998	PRJEB22247	2017-10-23	SRA
SAMEA104223999	PRJEB22247	2017-10-23	SRA
SAMEA104224000	PRJEB22247	2017-10-23	SRA
SAMEA104224001	PRJEB22247	2017-10-23	SRA
SAMEA104224002	PRJEB22247	2017-10-23	SRA
SAMEA104224003	PRJEB22247	2017-10-23	SRA
SAMEA104224004	PRJEB22247	2017-10-23	SRA
SAMEA104224005	PRJEB22247	2017-10-23	SRA
SAMEA104224006	PRJEB22247	2017-10-23	SRA
SAMEA104224007	PRJEB22247	2017-10-23	SRA
SAMEA104224008	PRJEB22247	2017-10-23	SRA
SAMEA104224009	PRJEB22247	2017-10-23	SRA
SAMEA104224010	PRJEB22247	2017-10-23	SRA
SAMEA104224011	PRJEB22247	2017-10-23	SRA
SAMEA104224012	PRJEB22247	2017-10-23	SRA
SAMEA104224013	PRJEB22247	2017-10-23	SRA
SAMEA104224014	PRJEB22247	2017-10-23	SRA
SAMEA104224015	PRJEB22247	2017-10-23	SRA
SAMEA104224016	PRJEB22247	2017-10-23	SRA
SAMEA104224017	PRJEB22247	2017-10-23	SRA
SAMEA104224018	PRJEB22247	2017-10-23	SRA
SAMEA104224019	PRJEB22247	2017-10-23	SRA
SAMEA104224020	PRJEB22247	2017-10-23	SRA
SAMEA104224021	PRJEB22247	2017-10-23	SRA
SAMEA104224022	PRJEB22247	2017-10-23	SRA
SAMEA104224023	PRJEB22247	2017-10-23	SRA
SAMEA104224024	PRJEB22247	2017-10-23	SRA
SAMEA104224025	PRJEB22247	2017-10-23	SRA
SAMEA104224026	PRJEB22247	2017-10-23	SRA
SAMEA104224027	PRJEB22247	2017-10-23	SRA
SAMEA104224028	PRJEB22247	2017-10-23	SRA
SAMEA104224029	PRJEB22247	2017-10-23	SRA
SAMEA104224030	PRJEB22247	2017-10-23	SRA
SAMEA104224031	PRJEB22247	2017-10-23	SRA
SAMEA104224032	PRJEB22247	2017-10-23	SRA
SAMEA104224033	PRJEB22247	2017-10-23	SRA
SAMEA104224034	PRJEB22247	2017-10-23	SRA
SAMEA104224035	PRJEB22247	2017-10-23	SRA
SAMEA104224036	PRJEB22247	2017-10-23	SRA
SAMEA104224037	PRJEB22247	2017-10-23	SRA
SAMEA104224038	PRJEB22247	2017-10-23	SRA
SAMEA104224039	PRJEB22247	2017-10-23	SRA
SAMEA104224040	PRJEB22247	2017-10-23	SRA
SAMEA104224041	PRJEB22247	2017-10-23	SRA
SAMEA104224042	PRJEB22247	2017-10-23	SRA
SAMEA104224043	PRJEB22247	2017-10-23	SRA
SAMEA104224044	PRJEB22247	2017-10-23	SRA
SAMEA104224045	PRJEB22247	2017-10-23	SRA
SAMEA104224046	PRJEB22247	2017-10-23	SRA
SAMEA104224047	PRJEB22247	2017-10-23	SRA
SAMEA104224048	PRJEB22247	2017-10-23	SRA
SAMEA104224049	PRJEB22247	2017-10-23	SRA
SAMEA104468257	PRJEB24380	2018-03-12	SRA
SAMEA104468263	PRJEB24380	2018-03-12	SRA
SAMEA104468264	PRJEB24380	2018-03-12	SRA
SAMEA104468265	PRJEB24380	2018-03-12	SRA
SAMEA104468266	PRJEB24380	2018-03-12	SRA
SAMEA104468267	PRJEB24380	2018-03-12	SRA
SAMEA104468268	PRJEB24380	2018-03-12	SRA
SAMEA104468269	PRJEB24380	2018-03-12	SRA
SAMEA104468270	PRJEB24380	2018-03-12	SRA
SAMEA104468271	PRJEB24380	2018-03-12	SRA
SAMEA104468272	PRJEB24380	2018-03-12	SRA
SAMEA104468273	PRJEB24380	2018-03-12	SRA
SAMEA104495751	PRJNA417061	2020-11-03	SRA
SAMEA104495752	PRJNA417061	2020-11-03	SRA
SAMEA104495753	PRJNA417061	2020-11-03	SRA
SAMEA104495754	PRJNA417062	2020-11-03	SRA
SAMEA104495756	PRJNA417061	2020-11-03	SRA
SAMEA104495757	PRJNA417062	2020-11-03	SRA
SAMEA104495759	PRJNA417062	2020-11-03	SRA
SAMEA104495760	PRJNA417062	2020-11-03	SRA
SAMEA104495761	PRJNA417062	2020-11-03	SRA
SAMEA104495764	PRJNA417061	2020-11-03	SRA
SAMEA104495765	PRJNA417061	2020-11-03	SRA
SAMEA104495766	PRJNA417061	2020-11-03	SRA
SAMEA104495767	PRJNA417062	2020-11-03	SRA
SAMEA104495768	PRJNA417061	2020-11-03	SRA
SAMEA104495769	PRJNA417062	2020-11-03	SRA
SAMEA104495771	PRJNA417062	2020-11-03	SRA
SAMEA104495772	PRJNA417062	2020-11-03	SRA
SAMEA104495774	PRJNA417062	2020-11-03	SRA
SAMEA104495775	PRJNA417061	2020-11-03	SRA
SAMEA104495776	PRJNA417061	2020-11-03	SRA
SAMEA104495777	PRJNA417061	2020-11-03	SRA
SAMEA104495778	PRJNA417061	2020-11-03	SRA
SAMEA104495779	PRJNA417062	2020-11-03	SRA
SAMEA104495781	PRJNA417061	2020-11-03	SRA
SAMEA104495782	PRJNA417062	2020-11-03	SRA
SAMEA104495783	PRJNA417062	2020-11-03	SRA
SAMEA104495784	PRJNA417061	2020-11-03	SRA
SAMEA104495785	PRJNA417061	2020-11-03	SRA
SAMEA104495786	PRJNA417062	2020-11-03	SRA
SAMEA104495787	PRJNA417061	2020-11-03	SRA
SAMEA104495788	PRJNA417062	2020-11-03	SRA
SAMEA104495789	PRJNA417061	2020-11-03	SRA
SAMEA104495791	PRJNA417062	2020-11-03	SRA
SAMEA104495795	PRJNA417061	2020-11-03	SRA
SAMEA104495796	PRJNA417062	2020-11-03	SRA
SAMEA104495797	PRJNA417062	2020-11-03	SRA
SAMEA104495798	PRJNA417062	2020-11-03	SRA
SAMEA104495800	PRJNA417062	2020-11-03	SRA
SAMEA104495801	PRJNA417062	2020-11-03	SRA
SAMEA104495802	PRJNA417061	2020-11-03	SRA
SAMEA104495804	PRJNA417062	2020-11-03	SRA
SAMEA104495805	PRJNA417062	2020-11-03	SRA
SAMEA104495806	PRJNA417061	2020-11-03	SRA
SAMEA104495808	PRJNA417062	2020-11-03	SRA
SAMEA104495809	PRJNA417061	2020-11-03	SRA
SAMEA104495810	PRJNA417062	2020-11-03	SRA
SAMEA104495811	PRJNA417061	2020-11-03	SRA
SAMEA104495812	PRJNA417061	2020-11-03	SRA
SAMEA104495813	PRJNA417061	2020-11-03	SRA
SAMEA104495814	PRJNA417061	2020-11-03	SRA
SAMEA104588171	PRJEB23469	2018-02-13	SRA
SAMEA104588172	PRJEB23469	2018-02-13	SRA
SAMEA104588173	PRJEB23469	2018-02-13	SRA
SAMEA104588174	PRJEB23469	2018-02-13	SRA
SAMEA104588175	PRJEB23469	2018-02-13	SRA
SAMEA104588176	PRJEB23469	2018-02-13	SRA
SAMEA104588177	PRJEB23469	2018-02-13	SRA
SAMEA104588178	PRJEB23469	2018-02-13	SRA
SAMEA104588179	PRJEB23469	2018-02-13	SRA
SAMEA104588180	PRJEB23469	2018-02-13	SRA
SAMEA104588181	PRJEB23469	2018-02-13	SRA
SAMEA104588182	PRJEB23469	2018-02-13	SRA
SAMEA104588183	PRJEB23469	2018-02-13	SRA
SAMEA104588184	PRJEB23469	2018-02-13	SRA
SAMEA104588185	PRJEB23469	2018-02-13	SRA
SAMEA104588186	PRJEB23469	2018-02-13	SRA
SAMEA104588187	PRJEB23469	2018-02-13	SRA
SAMEA104588188	PRJEB23469	2018-02-13	SRA
SAMEA104588189	PRJEB23469	2018-02-13	SRA
SAMEA104588190	PRJEB23469	2018-02-13	SRA
SAMEA104588191	PRJEB23469	2018-02-13	SRA
SAMEA104588192	PRJEB23469	2018-02-13	SRA
SAMEA104588193	PRJEB23469	2018-02-13	SRA
SAMEA104588194	PRJEB23469	2018-02-13	SRA
SAMEA104588195	PRJEB23469	2018-02-13	SRA
SAMEA104588196	PRJEB23469	2018-02-13	SRA
SAMEA104588197	PRJEB23469	2018-02-13	SRA
SAMEA104588198	PRJEB23469	2018-02-13	SRA
SAMEA104588199	PRJEB23469	2018-02-13	SRA
SAMEA104588200	PRJEB23469	2018-02-13	SRA
SAMEA104588201	PRJEB23469	2018-02-13	SRA
SAMEA104588202	PRJEB23469	2018-02-13	SRA
SAMEA104588203	PRJEB23469	2018-02-13	SRA
SAMEA104588204	PRJEB23469	2018-02-13	SRA
SAMEA104588205	PRJEB23469	2018-02-13	SRA
SAMEA104588206	PRJEB23469	2018-02-13	SRA
SAMEA104588207	PRJEB23469	2018-02-13	SRA
SAMEA104588208	PRJEB23469	2018-02-13	SRA
SAMEA104588209	PRJEB23469	2018-02-13	SRA
SAMEA104588210	PRJEB23469	2018-02-13	SRA
SAMEA104588211	PRJEB23469	2018-02-13	SRA
SAMEA104588212	PRJEB23469	2018-02-13	SRA
SAMEA104588213	PRJEB23469	2018-02-13	SRA
SAMEA104588214	PRJEB23469	2018-02-13	SRA
SAMEA104588215	PRJEB23469	2018-02-13	SRA
SAMEA104588216	PRJEB23469	2018-02-13	SRA
SAMEA104588217	PRJEB23469	2018-02-13	SRA
SAMEA104588218	PRJEB23469	2018-02-13	SRA
SAMEA104588219	PRJEB23469	2018-02-13	SRA
SAMEA104588220	PRJEB23469	2018-02-13	SRA
SAMEA104588221	PRJEB23469	2018-02-13	SRA
SAMEA104588222	PRJEB23469	2018-02-13	SRA
SAMEA104588223	PRJEB23469	2018-02-13	SRA
SAMEA104588224	PRJEB23469	2018-02-13	SRA
SAMEA104588225	PRJEB23469	2018-02-13	SRA
SAMEA104588226	PRJEB23469	2018-02-13	SRA
SAMEA104588227	PRJEB23469	2018-02-13	SRA
SAMEA104588228	PRJEB23469	2018-02-13	SRA
SAMEA104588229	PRJEB23469	2018-02-13	SRA
SAMEA104588230	PRJEB23469	2018-02-13	SRA
SAMEA104588231	PRJEB23469	2018-02-13	SRA
SAMEA104588232	PRJEB23469	2018-02-13	SRA
SAMEA104588233	PRJEB23469	2018-02-13	SRA
SAMEA104588234	PRJEB23469	2018-02-13	SRA
SAMEA104588235	PRJEB23469	2018-02-13	SRA
SAMEA104588236	PRJEB23469	2018-02-13	SRA
SAMEA104588237	PRJEB23469	2018-02-13	SRA
SAMEA104588238	PRJEB23469	2018-02-13	SRA
SAMEA104588239	PRJEB23469	2018-02-13	SRA
SAMEA104588240	PRJEB23469	2018-02-13	SRA
SAMEA104588241	PRJEB23469	2018-02-13	SRA
SAMEA104588242	PRJEB23469	2018-02-13	SRA
SAMEA104588243	PRJEB23469	2018-02-13	SRA
SAMEA104588244	PRJEB23469	2018-02-13	SRA
SAMEA104588245	PRJEB23469	2018-02-13	SRA
SAMEA104588246	PRJEB23469	2018-02-13	SRA
SAMEA104588247	PRJEB23469	2018-02-13	SRA
SAMEA104588248	PRJEB23469	2018-02-13	SRA
SAMEA104588249	PRJEB23469	2018-02-13	SRA
SAMEA104588250	PRJEB23469	2018-02-13	SRA
SAMEA104588251	PRJEB23469	2018-02-13	SRA
SAMEA104588252	PRJEB23469	2018-02-13	SRA
SAMEA104588253	PRJEB23469	2018-02-13	SRA
SAMEA104588254	PRJEB23469	2018-02-13	SRA
SAMEA104588255	PRJEB23469	2018-02-13	SRA
SAMEA104588256	PRJEB23469	2018-02-13	SRA
SAMEA104588257	PRJEB23469	2018-02-13	SRA
SAMEA104588258	PRJEB23469	2018-02-13	SRA
SAMEA104588259	PRJEB23469	2018-02-13	SRA
SAMEA104588260	PRJEB23469	2018-02-13	SRA
SAMEA104588261	PRJEB23469	2018-02-13	SRA
SAMEA104588262	PRJEB23469	2018-02-13	SRA
SAMEA104588263	PRJEB23469	2018-02-13	SRA
SAMEA104588264	PRJEB23469	2018-02-13	SRA
SAMEA104588265	PRJEB23469	2018-02-13	SRA
SAMEA104588266	PRJEB23469	2018-02-13	SRA
SAMEA104588267	PRJEB23469	2018-02-13	SRA
SAMEA104588268	PRJEB23469	2018-02-13	SRA
SAMEA104588269	PRJEB23469	2018-02-13	SRA
SAMEA104588270	PRJEB23469	2018-02-13	SRA
SAMEA104588271	PRJEB23469	2018-02-13	SRA
SAMEA104588272	PRJEB23469	2018-02-13	SRA
SAMEA104588273	PRJEB23469	2018-02-13	SRA
SAMEA104588274	PRJEB23469	2018-02-13	SRA
SAMEA104588275	PRJEB23469	2018-02-13	SRA
SAMEA104588276	PRJEB23469	2018-02-13	SRA
SAMEA104588277	PRJEB23469	2018-02-13	SRA
SAMEA104588278	PRJEB23469	2018-02-13	SRA
SAMEA104588279	PRJEB23469	2018-02-13	SRA
SAMEA104588280	PRJEB23469	2018-02-13	SRA
SAMEA104588281	PRJEB23469	2018-02-13	SRA
SAMEA104588282	PRJEB23469	2018-02-13	SRA
SAMEA104588283	PRJEB23469	2018-02-13	SRA
SAMEA104588284	PRJEB23469	2018-02-13	SRA
SAMEA104588285	PRJEB23469	2018-02-13	SRA
SAMEA104588286	PRJEB23469	2018-02-13	SRA
SAMEA104588287	PRJEB23469	2018-02-13	SRA
SAMEA104588288	PRJEB23469	2018-02-13	SRA
SAMEA104588289	PRJEB23469	2018-02-13	SRA
SAMEA104588290	PRJEB23469	2018-02-13	SRA
SAMEA104588291	PRJEB23469	2018-02-13	SRA
SAMEA104588292	PRJEB23469	2018-02-13	SRA
SAMEA104588293	PRJEB23469	2018-02-13	SRA
SAMEA104588294	PRJEB23469	2018-02-13	SRA
SAMEA104588295	PRJEB23469	2018-02-13	SRA
SAMEA104588296	PRJEB23469	2018-02-13	SRA
SAMEA104588297	PRJEB23469	2018-02-13	SRA
SAMEA104618855	PRJNA436715	2018-06-20	SRA
SAMEA104618856	PRJNA436715	2018-06-20	SRA
SAMEA104618857	PRJNA436715	2018-06-20	SRA
SAMEA104618858	PRJNA436715	2018-06-20	SRA
SAMEA104618859	PRJNA436715	2018-06-20	SRA
SAMEA104618860	PRJNA436715	2018-06-20	SRA
SAMEA104618861	PRJNA436715	2018-06-20	SRA
SAMEA104618862	PRJNA436715	2018-06-20	SRA
SAMEA104618863	PRJNA436715	2018-06-20	SRA
SAMEA104618864	PRJNA436715	2018-06-20	SRA
SAMEA104618866	PRJNA436715	2018-06-20	SRA
SAMEA104618867	PRJNA436715	2019-03-27	SRA
SAMEA104618868	PRJNA436715	2018-06-20	SRA
SAMEA104618869	PRJNA436715	2018-06-20	SRA
SAMEA104618870	PRJNA436715	2018-06-20	SRA
SAMEA104618871	PRJNA436715	2018-06-20	SRA
SAMEA104618872	PRJNA436715	2018-06-20	SRA
SAMEA104618873	PRJNA436715	2018-06-20	SRA
SAMEA104618874	PRJNA436715	2018-06-20	SRA
SAMEA104618875	PRJNA436715	2018-06-20	SRA
SAMEA104618876	PRJNA436715	2018-06-20	SRA
SAMEA104618877	PRJNA436715	2018-06-20	SRA
SAMEA104618878	PRJNA436715	2018-06-20	SRA
SAMEA104618879	PRJNA436715	2018-06-20	SRA
SAMEA104618880	PRJNA436715	2018-06-20	SRA
SAMEA104618881	PRJNA436715	2018-06-20	SRA
SAMEA104618882	PRJNA436715	2018-06-20	SRA
SAMEA104618883	PRJNA436715	2018-06-20	SRA
SAMEA104618884	PRJNA436715	2018-06-20	SRA
SAMEA104618885	PRJNA436715	2018-06-20	SRA
SAMEA104618886	PRJNA436715	2018-06-20	SRA
SAMEA104618887	PRJNA436715	2018-06-20	SRA
SAMEA104618889	PRJNA436715	2018-06-20	SRA
SAMEA104618890	PRJNA436715	2018-06-20	SRA
SAMEA104618891	PRJNA436715	2018-06-20	SRA
SAMEA104618892	PRJNA436715	2018-06-20	SRA
SAMEA104618893	PRJNA436715	2018-06-20	SRA
SAMEA104618894	PRJNA436715	2018-06-20	SRA
SAMEA104618896	PRJNA436715	2018-06-20	SRA
SAMEA104618898	PRJNA436715	2018-06-20	SRA
SAMEA104618899	PRJNA436715	2018-06-20	SRA
SAMEA104618900	PRJNA436715	2018-06-20	SRA
SAMEA104618901	PRJNA436715	2018-06-20	SRA
SAMEA104618906	PRJNA436715	2018-06-20	SRA
SAMEA104618907	PRJNA436715	2018-06-20	SRA
SAMEA104618910	PRJNA436715	2018-06-20	SRA
SAMEA104618911	PRJNA436715	2018-06-20	SRA
SAMEA104618913	PRJNA436715	2018-06-20	SRA
SAMEA104618915	PRJNA436715	2018-06-20	SRA
SAMEA104618916	PRJNA436715	2018-06-20	SRA
SAMEA104618918	PRJNA436715	2018-06-20	SRA
SAMEA104618919	PRJNA436715	2018-06-20	SRA
SAMEA104618921	PRJNA436715	2018-06-20	SRA
SAMEA104618923	PRJNA436715	2018-06-20	SRA
SAMEA104618924	PRJNA436715	2018-06-20	SRA
SAMEA104618931	PRJNA436715	2018-06-20	SRA
SAMEA104618932	PRJNA436715	2018-06-20	SRA
SAMEA104618935	PRJNA436715	2018-06-20	SRA
SAMEA104618936	PRJNA436715	2018-06-20	SRA
SAMEA104618939	PRJNA436715	2018-06-20	SRA
SAMEA104618940	PRJNA436715	2018-06-20	SRA
SAMEA104618943	PRJNA436715	2018-06-20	SRA
SAMEA104618946	PRJNA436715	2018-06-20	SRA
SAMEA104618947	PRJNA436715	2018-06-20	SRA
SAMEA104618948	PRJNA436715	2018-06-20	SRA
SAMEA104618950	PRJNA436715	2018-06-20	SRA
SAMEA104618951	PRJNA436715	2018-06-20	SRA
SAMEA104618954	PRJNA436715	2018-06-20	SRA
SAMEA104618955	PRJNA436715	2018-06-20	SRA
SAMEA104618956	PRJNA436715	2018-06-20	SRA
SAMEA104618958	PRJNA436715	2018-06-20	SRA
SAMEA104618959	PRJNA436715	2018-06-20	SRA
SAMEA104626814	PRJEB24166	2018-01-04	SRA
SAMEA104626815	PRJEB24166	2018-01-04	SRA
SAMEA104626818	PRJEB24166	2018-01-04	SRA
SAMEA104626822	PRJEB24166	2018-01-04	SRA
SAMEA104626823	PRJEB24166	2018-01-04	SRA
SAMEA104626826	PRJEB24166	2018-01-04	SRA
SAMEA104626827	PRJEB24166	2018-01-04	SRA
SAMEA104626832	PRJEB24166	2018-01-04	SRA
SAMEA104626833	PRJEB24166	2018-01-04	SRA
SAMEA104626834	PRJEB24166	2018-01-04	SRA
SAMEA104626839	PRJEB24166	2018-01-04	SRA
SAMEA104626840	PRJEB24166	2018-01-04	SRA
SAMEA104626844	PRJEB24166	2018-01-04	SRA
SAMEA104626845	PRJEB24166	2018-01-04	SRA
SAMEA104626846	PRJEB24166	2018-01-04	SRA
SAMEA104626850	PRJEB24166	2018-01-04	SRA
SAMEA104626852	PRJEB24166	2018-01-04	SRA
SAMEA104626853	PRJEB24166	2018-01-04	SRA
SAMEA104626857	PRJEB24166	2018-01-04	SRA
SAMEA104626860	PRJEB24166	2018-01-04	SRA
SAMEA104626863	PRJEB24166	2018-01-04	SRA
SAMEA104626865	PRJEB24166	2018-01-04	SRA
SAMEA104626866	PRJEB24166	2018-01-04	SRA
SAMEA104626867	PRJEB24166	2018-01-04	SRA
SAMEA104626868	PRJEB24166	2018-01-04	SRA
SAMEA104626869	PRJEB24166	2018-01-04	SRA
SAMEA104626874	PRJEB24166	2018-01-04	SRA
SAMEA104626878	PRJEB24166	2018-01-04	SRA
SAMEA104626879	PRJEB24166	2018-01-04	SRA
SAMEA104626882	PRJEB24166	2018-01-04	SRA
SAMEA104626884	PRJEB24166	2018-01-04	SRA
SAMEA104626888	PRJEB24166	2018-01-04	SRA
SAMEA104626889	PRJEB24166	2018-01-04	SRA
SAMEA104626890	PRJEB24166	2018-01-04	SRA
SAMEA104626893	PRJEB24166	2018-01-04	SRA
SAMEA104626895	PRJEB24166	2018-01-04	SRA
SAMEA1088313	PRJEB27455	2018-07-04	SRA
SAMEA1088317	PRJEB27455	2018-07-04	SRA
SAMEA1088318	PRJEB27455	2018-07-04	SRA
SAMEA1088339	PRJEB27455	2018-07-04	SRA
SAMEA1088354	PRJEB27455	2018-07-04	SRA
SAMEA110328993	PRJEB54651	2022-07-14	SRA
SAMEA110328994	PRJEB54651	2022-07-14	SRA
SAMEA110328995	PRJEB54651	2022-07-14	SRA
SAMEA110328996	PRJEB54651	2022-07-14	SRA
SAMEA110328997	PRJEB54651	2022-07-14	SRA
SAMEA110328998	PRJEB54651	2022-07-14	SRA
SAMEA110328999	PRJEB54651	2022-07-14	SRA
SAMEA110329000	PRJEB54651	2022-07-14	SRA
SAMEA110329001	PRJEB54651	2022-07-14	SRA
SAMEA110329002	PRJEB54651	2022-07-14	SRA
SAMEA110329003	PRJEB54651	2022-07-14	SRA
SAMEA110329004	PRJEB54651	2022-07-14	SRA
SAMEA110329005	PRJEB54651	2022-07-14	SRA
SAMEA110329006	PRJEB54651	2022-07-14	SRA
SAMEA110329007	PRJEB54651	2022-07-14	SRA
SAMEA110329008	PRJEB54651	2022-07-14	SRA
SAMEA110329009	PRJEB54651	2022-07-14	SRA
SAMEA110329010	PRJEB54651	2022-07-14	SRA
SAMEA110329011	PRJEB54651	2022-07-14	SRA
SAMEA110329012	PRJEB54651	2022-07-14	SRA
SAMEA110329013	PRJEB54651	2022-07-14	SRA
SAMEA110329014	PRJEB54651	2022-07-14	SRA
SAMEA110329015	PRJEB54651	2022-07-14	SRA
SAMEA110329016	PRJEB54651	2022-07-14	SRA
SAMEA110329017	PRJEB54651	2022-07-14	SRA
SAMEA110329018	PRJEB54651	2022-07-14	SRA
SAMEA110329019	PRJEB54651	2022-07-14	SRA
SAMEA110329020	PRJEB54651	2022-07-14	SRA
SAMEA110329021	PRJEB54651	2022-07-14	SRA
SAMEA110329022	PRJEB54651	2022-07-14	SRA
SAMEA110329023	PRJEB54651	2022-07-14	SRA
SAMEA110329024	PRJEB54651	2022-07-14	SRA
SAMEA110329025	PRJEB54651	2022-07-14	SRA
SAMEA110329026	PRJEB54651	2022-07-14	SRA
SAMEA110329027	PRJEB54651	2022-07-14	SRA
SAMEA110329028	PRJEB54651	2022-07-14	SRA
SAMEA110329029	PRJEB54651	2022-07-14	SRA
SAMEA110329030	PRJEB54651	2022-07-14	SRA
SAMEA110329031	PRJEB54651	2022-07-14	SRA
SAMEA110329032	PRJEB54651	2022-07-14	SRA
SAMEA110329033	PRJEB54651	2022-07-14	SRA
SAMEA110329034	PRJEB54651	2022-07-14	SRA
SAMEA110329035	PRJEB54651	2022-07-14	SRA
SAMEA110329036	PRJEB54651	2022-07-14	SRA
SAMEA110329037	PRJEB54651	2022-07-14	SRA
SAMEA110329038	PRJEB54651	2022-07-14	SRA
SAMEA110329039	PRJEB54651	2022-07-14	SRA
SAMEA110329040	PRJEB54651	2022-07-14	SRA
SAMEA110329041	PRJEB54651	2022-07-14	SRA
SAMEA110329042	PRJEB54651	2022-07-14	SRA
SAMEA110329043	PRJEB54651	2022-07-14	SRA
SAMEA110329044	PRJEB54651	2022-07-14	SRA
SAMEA110329045	PRJEB54651	2022-07-14	SRA
SAMEA110329046	PRJEB54651	2022-07-14	SRA
SAMEA110329047	PRJEB54651	2022-07-14	SRA
SAMEA110329048	PRJEB54651	2022-07-14	SRA
SAMEA110329049	PRJEB54651	2022-07-14	SRA
SAMEA110329050	PRJEB54651	2022-07-14	SRA
SAMEA110329051	PRJEB54651	2022-07-14	SRA
SAMEA110329052	PRJEB54651	2022-07-14	SRA
SAMEA110329053	PRJEB54651	2022-07-14	SRA
SAMEA110329054	PRJEB54651	2022-07-14	SRA
SAMEA110329055	PRJEB54651	2022-07-14	SRA
SAMEA110329056	PRJEB54651	2022-07-14	SRA
SAMEA110329057	PRJEB54651	2022-07-14	SRA
SAMEA110329058	PRJEB54651	2022-07-14	SRA
SAMEA110329059	PRJEB54651	2022-07-14	SRA
SAMEA110329060	PRJEB54651	2022-07-14	SRA
SAMEA110329061	PRJEB54651	2022-07-14	SRA
SAMEA110329062	PRJEB54651	2022-07-14	SRA
SAMEA110329063	PRJEB54651	2022-07-14	SRA
SAMEA110329064	PRJEB54651	2022-07-14	SRA
SAMEA111328912	PRJEB46995	2022-09-15	SRA
SAMEA111328913	PRJEB46995	2022-09-15	SRA
SAMEA111328914	PRJEB46995	2022-09-15	SRA
SAMEA111328915	PRJEB46995	2022-09-15	SRA
SAMEA111328916	PRJEB46995	2022-09-15	SRA
SAMEA111328917	PRJEB46995	2022-09-15	SRA
SAMEA111328918	PRJEB46995	2022-09-15	SRA
SAMEA111328919	PRJEB46995	2022-09-15	SRA
SAMEA111328920	PRJEB46995	2022-09-15	SRA
SAMEA111328921	PRJEB46995	2022-09-15	SRA
SAMEA111328922	PRJEB46995	2022-09-15	SRA
SAMEA111328923	PRJEB46995	2022-09-15	SRA
SAMEA111328924	PRJEB46995	2022-09-15	SRA
SAMEA111328925	PRJEB46995	2022-09-15	SRA
SAMEA111328926	PRJEB46995	2022-09-15	SRA
SAMEA111328927	PRJEB46995	2022-09-15	SRA
SAMEA111328928	PRJEB46995	2022-09-15	SRA
SAMEA111328929	PRJEB46995	2022-09-15	SRA
SAMEA111328930	PRJEB46995	2022-09-15	SRA
SAMEA111328931	PRJEB46995	2022-09-15	SRA
SAMEA111328932	PRJEB46995	2022-09-15	SRA
SAMEA111328933	PRJEB46995	2022-09-15	SRA
SAMEA111328934	PRJEB46995	2022-09-15	SRA
SAMEA111328935	PRJEB46995	2022-09-15	SRA
SAMEA111328936	PRJEB46995	2022-09-15	SRA
SAMEA111328937	PRJEB46995	2022-09-15	SRA
SAMEA111328938	PRJEB46995	2022-09-15	SRA
SAMEA111328939	PRJEB46995	2022-09-15	SRA
SAMEA111328940	PRJEB46995	2022-09-15	SRA
SAMEA111328941	PRJEB46995	2022-09-15	SRA
SAMEA111328942	PRJEB46995	2022-09-15	SRA
SAMEA111328943	PRJEB46995	2022-09-15	SRA
SAMEA112352657	PRJEB59065	2023-01-29	SRA
SAMEA112352658	PRJEB59065	2023-01-29	SRA
SAMEA112352659	PRJEB59065	2023-01-29	SRA
SAMEA112352660	PRJEB59065	2023-01-29	SRA
SAMEA112352661	PRJEB59065	2023-01-29	SRA
SAMEA112352662	PRJEB59065	2023-01-29	SRA
SAMEA112352663	PRJEB59065	2023-01-29	SRA
SAMEA112352664	PRJEB59065	2023-01-29	SRA
SAMEA112352665	PRJEB59065	2023-01-29	SRA
SAMEA112352666	PRJEB59065	2023-01-29	SRA
SAMEA112352667	PRJEB59065	2023-01-29	SRA
SAMEA112352668	PRJEB59065	2023-01-29	SRA
SAMEA112352669	PRJEB59065	2023-01-29	SRA
SAMEA112352670	PRJEB59065	2023-01-29	SRA
SAMEA112352671	PRJEB59065	2023-01-29	SRA
SAMEA112352672	PRJEB59065	2023-01-29	SRA
SAMEA112352673	PRJEB59065	2023-01-29	SRA
SAMEA112352674	PRJEB59065	2023-01-29	SRA
SAMEA112352675	PRJEB59065	2023-01-29	SRA
SAMEA112352676	PRJEB59065	2023-01-29	SRA
SAMEA112366767	PRJEB59267	2023-02-07	SRA
SAMEA112366768	PRJEB59267	2023-02-07	SRA
SAMEA112366769	PRJEB59267	2023-02-07	SRA
SAMEA112366770	PRJEB59267	2023-02-07	SRA
SAMEA112366771	PRJEB59267	2023-02-07	SRA
SAMEA112366772	PRJEB59267	2023-02-07	SRA
SAMEA112366773	PRJEB59267	2023-02-07	SRA
SAMEA112366774	PRJEB59267	2023-02-07	SRA
SAMEA112366775	PRJEB59267	2023-02-07	SRA
SAMEA112366776	PRJEB59267	2023-02-07	SRA
SAMEA112366777	PRJEB59267	2023-02-07	SRA
SAMEA112366778	PRJEB59267	2023-02-07	SRA
SAMEA112843208	PRJEB60952	2023-03-31	SRA
SAMEA112946140	PRJEB61513	2023-04-27	SRA
SAMEA112946141	PRJEB61513	2023-04-27	SRA
SAMEA112946142	PRJEB61513	2023-04-27	SRA
SAMEA112946143	PRJEB61513	2023-04-27	SRA
SAMEA112946144	PRJEB61513	2023-04-27	SRA
SAMEA112946145	PRJEB61513	2023-04-27	SRA
SAMEA112946146	PRJEB61513	2023-04-27	SRA
SAMEA112946147	PRJEB61513	2023-04-27	SRA
SAMEA112946148	PRJEB61513	2023-04-27	SRA
SAMEA112946149	PRJEB61513	2023-04-27	SRA
SAMEA112946150	PRJEB61513	2023-04-27	SRA
SAMEA112946151	PRJEB61513	2023-04-27	SRA
SAMEA112946152	PRJEB61513	2023-04-27	SRA
SAMEA112946153	PRJEB61513	2023-04-27	SRA
SAMEA112946154	PRJEB61513	2023-04-27	SRA
SAMEA112946155	PRJEB61513	2023-04-27	SRA
SAMEA112946156	PRJEB61513	2023-04-27	SRA
SAMEA112946157	PRJEB61513	2023-04-27	SRA
SAMEA113578967	PRJEB46995	2023-06-11	SRA
SAMEA113578968	PRJEB46995	2023-06-11	SRA
SAMEA113578969	PRJEB46995	2023-06-11	SRA
SAMEA113578970	PRJEB46995	2023-06-11	SRA
SAMEA113578971	PRJEB46995	2023-06-11	SRA
SAMEA113578972	PRJEB46995	2023-06-11	SRA
SAMEA113578973	PRJEB46995	2023-06-11	SRA
SAMEA113578974	PRJEB46995	2023-06-11	SRA
SAMEA113578975	PRJEB46995	2023-06-11	SRA
SAMEA113578976	PRJEB46995	2023-06-11	SRA
SAMEA113578977	PRJEB46995	2022-07-11	SRA
SAMEA113578978	PRJEB46995	2023-06-11	SRA
SAMEA113578979	PRJEB46995	2023-06-11	SRA
SAMEA113578980	PRJEB46995	2023-06-11	SRA
SAMEA113578981	PRJEB46995	2023-06-11	SRA
SAMEA113578982	PRJEB46995	2023-06-11	SRA
SAMEA113601195	PRJEB46995	2023-06-22	SRA
SAMEA113601196	PRJEB46995	2023-06-22	SRA
SAMEA113601197	PRJEB46995	2023-06-22	SRA
SAMEA113601198	PRJEB46995	2023-06-22	SRA
SAMEA113601199	PRJEB46995	2023-06-22	SRA
SAMEA113601200	PRJEB46995	2023-06-22	SRA
SAMEA113601201	PRJEB46995	2023-06-22	SRA
SAMEA113601202	PRJEB46995	2023-06-22	SRA
SAMEA113601203	PRJEB46995	2023-06-22	SRA
SAMEA113601204	PRJEB46995	2023-06-22	SRA
SAMEA113601205	PRJEB46995	2023-06-22	SRA
SAMEA113601206	PRJEB46995	2023-06-22	SRA
SAMEA113601207	PRJEB46995	2023-06-22	SRA
SAMEA113601208	PRJEB46995	2023-06-22	SRA
SAMEA113601209	PRJEB46995	2023-06-22	SRA
SAMEA113601210	PRJEB46995	2023-06-22	SRA
SAMEA113601211	PRJEB46995	2023-06-22	SRA
SAMEA113601212	PRJEB46995	2023-06-22	SRA
SAMEA113601213	PRJEB46995	2023-06-22	SRA
SAMEA113601214	PRJEB46995	2023-06-11	SRA
SAMEA113601215	PRJEB46995	2023-06-22	SRA
SAMEA113601216	PRJEB46995	2023-06-22	SRA
SAMEA113601217	PRJEB46995	2023-06-22	SRA
SAMEA113601218	PRJEB46995	2023-06-22	SRA
SAMEA113601219	PRJEB46995	2023-06-22	SRA
SAMEA113601220	PRJEB46995	2023-06-22	SRA
SAMEA113601221	PRJEB46995	2023-06-22	SRA
SAMEA113601222	PRJEB46995	2023-06-22	SRA
SAMEA113601223	PRJEB46995	2023-06-22	SRA
SAMEA113601224	PRJEB46995	2023-06-22	SRA
SAMEA113601225	PRJEB46995	2023-06-22	SRA
SAMEA113601226	PRJEB46995	2023-06-22	SRA
SAMEA113601227	PRJEB46995	2023-06-22	SRA
SAMEA113601228	PRJEB46995	2023-06-22	SRA
SAMEA113601229	PRJEB46995	2023-06-22	SRA
SAMEA113601230	PRJEB46995	2023-06-22	SRA
SAMEA113601231	PRJEB46995	2023-06-22	SRA
SAMEA113601232	PRJEB46995	2023-06-22	SRA
SAMEA113601233	PRJEB46995	2023-06-22	SRA
SAMEA113601234	PRJEB46995	2023-06-22	SRA
SAMEA113601235	PRJEB46995	2023-06-22	SRA
SAMEA113601236	PRJEB46995	2023-06-22	SRA
SAMEA113601237	PRJEB46995	2023-06-22	SRA
SAMEA113601238	PRJEB46995	2023-06-22	SRA
SAMEA113601239	PRJEB46995	2023-06-22	SRA
SAMEA113601240	PRJEB46995	2023-06-22	SRA
SAMEA113601241	PRJEB46995	2023-06-22	SRA
SAMEA113601242	PRJEB46995	2023-06-22	SRA
SAMEA113601243	PRJEB46995	2023-06-22	SRA
SAMEA113601244	PRJEB46995	2023-06-22	SRA
SAMEA113601245	PRJEB46995	2023-06-22	SRA
SAMEA113601246	PRJEB46995	2023-06-22	SRA
SAMEA113601247	PRJEB46995	2023-06-22	SRA
SAMEA113601248	PRJEB46995	2023-06-22	SRA
SAMEA113601249	PRJEB46995	2023-06-22	SRA
SAMEA113601250	PRJEB46995	2023-06-22	SRA
SAMEA113601251	PRJEB46995	2023-06-22	SRA
SAMEA113601252	PRJEB46995	2023-06-22	SRA
SAMEA113601253	PRJEB46995	2023-06-22	SRA
SAMEA113601254	PRJEB46995	2023-06-22	SRA
SAMEA113601255	PRJEB46995	2023-06-22	SRA
SAMEA113601256	PRJEB46995	2023-06-22	SRA
SAMEA113601257	PRJEB46995	2023-06-22	SRA
SAMEA113601258	PRJEB46995	2023-06-22	SRA
SAMEA113601259	PRJEB46995	2023-06-22	SRA
SAMEA113601260	PRJEB46995	2023-06-22	SRA
SAMEA113601261	PRJEB46995	2023-06-22	SRA
SAMEA113601262	PRJEB46995	2023-06-22	SRA
SAMEA113601263	PRJEB46995	2023-06-22	SRA
SAMEA113601264	PRJEB46995	2023-06-22	SRA
SAMEA113601265	PRJEB46995	2023-06-22	SRA
SAMEA113601266	PRJEB46995	2023-06-22	SRA
SAMEA113601267	PRJEB46995	2023-06-22	SRA
SAMEA113601268	PRJEB46995	2023-06-22	SRA
SAMEA113601269	PRJEB46995	2023-06-22	SRA
SAMEA113601270	PRJEB46995	2023-06-22	SRA
SAMEA113601271	PRJEB46995	2023-06-22	SRA
SAMEA113601272	PRJEB46995	2023-06-22	SRA
SAMEA113601273	PRJEB46995	2023-06-22	SRA
SAMEA113601274	PRJEB46995	2023-06-22	SRA
SAMEA113601275	PRJEB46995	2023-06-22	SRA
SAMEA113601276	PRJEB46995	2023-06-22	SRA
SAMEA113601277	PRJEB46995	2023-06-22	SRA
SAMEA113601278	PRJEB46995	2023-06-22	SRA
SAMEA113601279	PRJEB46995	2023-06-22	SRA
SAMEA113601280	PRJEB46995	2023-06-22	SRA
SAMEA113601281	PRJEB46995	2023-06-22	SRA
SAMEA113601282	PRJEB46995	2023-06-22	SRA
SAMEA113601283	PRJEB46995	2023-06-22	SRA
SAMEA113601284	PRJEB46995	2023-06-22	SRA
SAMEA113601285	PRJEB46995	2023-06-22	SRA
SAMEA113601286	PRJEB46995	2023-06-22	SRA
SAMEA113601287	PRJEB46995	2023-06-22	SRA
SAMEA113601288	PRJEB46995	2023-06-22	SRA
SAMEA113601289	PRJEB46995	2023-06-22	SRA
SAMEA113601290	PRJEB46995	2023-06-22	SRA
SAMEA113601291	PRJEB46995	2023-06-22	SRA
SAMEA113601292	PRJEB46995	2023-06-22	SRA
SAMEA113601293	PRJEB46995	2023-06-22	SRA
SAMEA113601294	PRJEB46995	2023-06-22	SRA
SAMEA113601295	PRJEB46995	2023-06-22	SRA
SAMEA113601296	PRJEB46995	2023-06-22	SRA
SAMEA113601297	PRJEB46995	2023-06-22	SRA
SAMEA113601298	PRJEB46995	2023-06-22	SRA
SAMEA113601299	PRJEB46995	2023-06-22	SRA
SAMEA113601300	PRJEB46995	2023-06-22	SRA
SAMEA113601301	PRJEB46995	2023-06-22	SRA
SAMEA113601302	PRJEB46995	2023-06-22	SRA
SAMEA113601303	PRJEB46995	2023-06-22	SRA
SAMEA113601304	PRJEB46995	2023-06-22	SRA
SAMEA113601305	PRJEB46995	2023-06-22	SRA
SAMEA113601306	PRJEB46995	2023-06-22	SRA
SAMEA113601307	PRJEB46995	2023-06-22	SRA
SAMEA113601308	PRJEB46995	2023-06-22	SRA
SAMEA113601309	PRJEB46995	2023-06-22	SRA
SAMEA113601310	PRJEB46995	2023-06-22	SRA
SAMEA113601311	PRJEB46995	2023-06-22	SRA
SAMEA113601312	PRJEB46995	2023-06-22	SRA
SAMEA113601313	PRJEB46995	2023-06-22	SRA
SAMEA113601314	PRJEB46995	2023-06-22	SRA
SAMEA113601315	PRJEB46995	2023-06-22	SRA
SAMEA113601316	PRJEB46995	2023-06-22	SRA
SAMEA113601317	PRJEB46995	2023-06-22	SRA
SAMEA113601318	PRJEB46995	2023-06-22	SRA
SAMEA113601319	PRJEB46995	2023-06-22	SRA
SAMEA113601320	PRJEB46995	2023-06-22	SRA
SAMEA113601321	PRJEB46995	2023-06-22	SRA
SAMEA113601322	PRJEB46995	2023-06-22	SRA
SAMEA113601323	PRJEB46995	2023-06-22	SRA
SAMEA113601324	PRJEB46995	2023-06-22	SRA
SAMEA113601325	PRJEB46995	2023-06-22	SRA
SAMEA113601326	PRJEB46995	2023-06-22	SRA
SAMEA113601327	PRJEB46995	2023-06-22	SRA
SAMEA113601328	PRJEB46995	2023-06-22	SRA
SAMEA113601329	PRJEB46995	2023-06-22	SRA
SAMEA113601330	PRJEB46995	2023-06-22	SRA
SAMEA113601331	PRJEB46995	2023-06-22	SRA
SAMEA113601332	PRJEB46995	2023-06-22	SRA
SAMEA113601333	PRJEB46995	2023-06-22	SRA
SAMEA113601334	PRJEB46995	2023-06-22	SRA
SAMEA113601335	PRJEB46995	2023-06-22	SRA
SAMEA113601336	PRJEB46995	2023-06-22	SRA
SAMEA113601337	PRJEB46995	2023-06-22	SRA
SAMEA113601338	PRJEB46995	2023-06-22	SRA
SAMEA113601339	PRJEB46995	2023-06-22	SRA
SAMEA113601340	PRJEB46995	2023-06-22	SRA
SAMEA113601341	PRJEB46995	2023-06-22	SRA
SAMEA113601342	PRJEB46995	2023-06-22	SRA
SAMEA113601343	PRJEB46995	2023-06-22	SRA
SAMEA113601344	PRJEB46995	2023-06-22	SRA
SAMEA113601345	PRJEB46995	2023-06-22	SRA
SAMEA113601346	PRJEB46995	2023-06-22	SRA
SAMEA113601347	PRJEB46995	2023-06-22	SRA
SAMEA113601348	PRJEB46995	2023-06-22	SRA
SAMEA113601349	PRJEB46995	2023-06-22	SRA
SAMEA113601350	PRJEB46995	2023-06-22	SRA
SAMEA113601351	PRJEB46995	2023-06-22	SRA
SAMEA113601352	PRJEB46995	2023-06-22	SRA
SAMEA113601353	PRJEB46995	2023-06-22	SRA
SAMEA113601354	PRJEB46995	2023-06-22	SRA
SAMEA113601355	PRJEB46995	2023-06-22	SRA
SAMEA113601356	PRJEB46995	2023-06-22	SRA
SAMEA113601357	PRJEB46995	2023-06-22	SRA
SAMEA113601358	PRJEB46995	2023-06-22	SRA
SAMEA113601359	PRJEB46995	2023-06-22	SRA
SAMEA113601360	PRJEB46995	2023-06-22	SRA
SAMEA113601361	PRJEB46995	2023-06-22	SRA
SAMEA113601362	PRJEB46995	2023-06-22	SRA
SAMEA113601363	PRJEB46995	2023-06-22	SRA
SAMEA113601364	PRJEB46995	2023-06-22	SRA
SAMEA113601365	PRJEB46995	2023-06-22	SRA
SAMEA113601366	PRJEB46995	2023-06-22	SRA
SAMEA113601367	PRJEB46995	2023-06-22	SRA
SAMEA113601368	PRJEB46995	2023-06-22	SRA
SAMEA113601369	PRJEB46995	2023-06-22	SRA
SAMEA113601370	PRJEB46995	2023-06-22	SRA
SAMEA113601371	PRJEB46995	2023-06-22	SRA
SAMEA113601372	PRJEB46995	2023-06-22	SRA
SAMEA113601373	PRJEB46995	2023-06-22	SRA
SAMEA113601374	PRJEB46995	2023-06-22	SRA
SAMEA113601375	PRJEB46995	2023-06-22	SRA
SAMEA113601376	PRJEB46995	2023-06-22	SRA
SAMEA113601377	PRJEB46995	2023-06-22	SRA
SAMEA113601378	PRJEB46995	2023-06-22	SRA
SAMEA113601379	PRJEB46995	2023-06-22	SRA
SAMEA113601380	PRJEB46995	2023-06-22	SRA
SAMEA113601381	PRJEB46995	2023-06-22	SRA
SAMEA114111477	PRJEB64479	2023-10-29	SRA
SAMEA114111478	PRJEB64479	2023-10-29	SRA
SAMEA114111479	PRJEB64479	2023-10-29	SRA
SAMEA114111480	PRJEB64479	2023-10-29	SRA
SAMEA13451886	PRJEB50632	2022-07-06	SRA
SAMEA13451887	PRJEB50632	2022-07-06	SRA
SAMEA13451888	PRJEB50632	2022-07-06	SRA
SAMEA13451889	PRJEB50632	2022-07-06	SRA
SAMEA13451890	PRJEB50632	2022-07-06	SRA
SAMEA13451891	PRJEB50632	2022-07-06	SRA
SAMEA13451892	PRJEB50632	2022-07-06	SRA
SAMEA13451893	PRJEB50632	2022-07-06	SRA
SAMEA14281268	PRJEB52525	2022-05-24	SRA
SAMEA14281269	PRJEB52525	2022-05-24	SRA
SAMEA14281270	PRJEB52525	2022-05-24	SRA
SAMEA14281271	PRJEB52525	2022-05-24	SRA
SAMEA14281272	PRJEB52525	2022-05-24	SRA
SAMEA14281273	PRJEB52525	2022-05-24	SRA
SAMEA14281274	PRJEB52525	2022-05-24	SRA
SAMEA14281275	PRJEB52525	2022-05-24	SRA
SAMEA14281276	PRJEB52525	2022-05-24	SRA
SAMEA14281277	PRJEB52525	2022-05-24	SRA
SAMEA14281278	PRJEB52525	2022-05-24	SRA
SAMEA14281279	PRJEB52525	2022-05-24	SRA
SAMEA14281280	PRJEB52525	2022-05-24	SRA
SAMEA14281281	PRJEB52525	2022-05-24	SRA
SAMEA14281282	PRJEB52525	2022-05-24	SRA
SAMEA14368211	PRJEB52710	2022-07-30	SRA
SAMEA14368213	PRJEB52710	2022-07-30	SRA
SAMEA14368215	PRJEB52710	2022-07-30	SRA
SAMEA14368218	PRJEB52710	2022-07-30	SRA
SAMEA14368220	PRJEB52710	2022-07-30	SRA
SAMEA14368223	PRJEB52710	2022-07-30	SRA
SAMEA14368225	PRJEB52710	2022-07-30	SRA
SAMEA14368227	PRJEB52710	2022-07-30	SRA
SAMEA14368229	PRJEB52710	2022-07-30	SRA
SAMEA14368231	PRJEB52710	2022-07-30	SRA
SAMEA14368234	PRJEB52710	2022-07-30	SRA
SAMEA14368236	PRJEB52710	2022-07-30	SRA
SAMEA14368238	PRJEB52710	2022-07-30	SRA
SAMEA14368240	PRJEB52710	2022-07-30	SRA
SAMEA14368242	PRJEB52710	2022-07-30	SRA
SAMEA14368243	PRJEB52710	2022-07-30	SRA
SAMEA14368246	PRJEB52710	2022-07-30	SRA
SAMEA14368248	PRJEB52710	2022-07-30	SRA
SAMEA14368250	PRJEB52710	2022-07-30	SRA
SAMEA14368252	PRJEB52710	2022-07-30	SRA
SAMEA14368253	PRJEB52710	2022-07-30	SRA
SAMEA14368254	PRJEB52710	2022-07-30	SRA
SAMEA14368256	PRJEB52710	2022-07-30	SRA
SAMEA14368257	PRJEB52710	2022-07-30	SRA
SAMEA14368258	PRJEB52710	2022-07-30	SRA
SAMEA14368259	PRJEB52710	2022-07-30	SRA
SAMEA14368261	PRJEB52710	2022-07-30	SRA
SAMEA14368263	PRJEB52710	2022-07-30	SRA
SAMEA14368265	PRJEB52710	2022-07-30	SRA
SAMEA14368266	PRJEB52710	2022-07-30	SRA
SAMEA14368268	PRJEB52710	2022-07-30	SRA
SAMEA14368269	PRJEB52710	2022-07-30	SRA
SAMEA14368271	PRJEB52710	2022-07-30	SRA
SAMEA14368272	PRJEB52710	2022-07-30	SRA
SAMEA14368276	PRJEB52710	2022-07-30	SRA
SAMEA14368279	PRJEB52710	2022-07-30	SRA
SAMEA14368280	PRJEB52710	2022-07-30	SRA
SAMEA14368281	PRJEB52710	2022-07-30	SRA
SAMEA14368283	PRJEB52710	2022-07-30	SRA
SAMEA14368285	PRJEB52710	2022-07-30	SRA
SAMEA14368287	PRJEB52710	2022-07-30	SRA
SAMEA14368288	PRJEB52710	2022-07-30	SRA
SAMEA14368289	PRJEB52710	2022-07-30	SRA
SAMEA14368291	PRJEB52710	2022-07-30	SRA
SAMEA14368297	PRJEB52710	2022-07-30	SRA
SAMEA14368300	PRJEB52710	2022-07-30	SRA
SAMEA14368303	PRJEB52710	2022-07-30	SRA
SAMEA14368304	PRJEB52710	2022-07-30	SRA
SAMEA14368307	PRJEB52710	2022-07-30	SRA
SAMEA14368311	PRJEB52710	2022-07-30	SRA
SAMEA14368312	PRJEB52710	2022-07-30	SRA
SAMEA14368315	PRJEB52710	2022-07-30	SRA
SAMEA14368321	PRJEB52710	2022-07-30	SRA
SAMEA14368324	PRJEB52710	2022-07-30	SRA
SAMEA14368328	PRJEB52710	2022-07-30	SRA
SAMEA14368330	PRJEB52710	2022-07-30	SRA
SAMEA14368337	PRJEB52710	2022-07-30	SRA
SAMEA14368340	PRJEB52710	2022-07-30	SRA
SAMEA14368341	PRJEB52710	2022-07-30	SRA
SAMEA14368344	PRJEB52710	2022-07-30	SRA
SAMEA14368345	PRJEB52710	2022-07-30	SRA
SAMEA14368346	PRJEB52710	2022-07-30	SRA
SAMEA14368349	PRJEB52710	2022-07-30	SRA
SAMEA14368352	PRJEB52710	2022-07-30	SRA
SAMEA14368355	PRJEB52710	2022-07-30	SRA
SAMEA14368357	PRJEB52710	2022-07-30	SRA
SAMEA14368359	PRJEB52710	2022-07-30	SRA
SAMEA14368361	PRJEB52710	2022-07-30	SRA
SAMEA14368364	PRJEB52710	2022-07-30	SRA
SAMEA14368366	PRJEB52710	2022-07-30	SRA
SAMEA14368368	PRJEB52710	2022-07-30	SRA
SAMEA14368371	PRJEB52710	2022-07-30	SRA
SAMEA14368372	PRJEB52710	2022-07-30	SRA
SAMEA14368374	PRJEB52710	2022-07-30	SRA
SAMEA14368376	PRJEB52710	2022-07-30	SRA
SAMEA14368377	PRJEB52710	2022-07-30	SRA
SAMEA14368379	PRJEB52710	2022-07-30	SRA
SAMEA14368381	PRJEB52710	2022-07-30	SRA
SAMEA14368384	PRJEB52710	2022-07-30	SRA
SAMEA14368388	PRJEB52710	2022-07-30	SRA
SAMEA14368390	PRJEB52710	2022-07-30	SRA
SAMEA14368392	PRJEB52710	2022-07-30	SRA
SAMEA14368393	PRJEB52710	2022-07-30	SRA
SAMEA14368394	PRJEB52710	2022-07-30	SRA
SAMEA14368395	PRJEB52710	2022-07-30	SRA
SAMEA14368396	PRJEB52710	2022-07-30	SRA
SAMEA14368397	PRJEB52710	2022-07-30	SRA
SAMEA14368400	PRJEB52710	2022-07-30	SRA
SAMEA14368402	PRJEB52710	2022-07-30	SRA
SAMEA14368405	PRJEB52710	2022-07-30	SRA
SAMEA14368406	PRJEB52710	2022-07-30	SRA
SAMEA14368408	PRJEB52710	2022-07-30	SRA
SAMEA14368411	PRJEB52710	2022-07-30	SRA
SAMEA14368412	PRJEB52710	2022-07-30	SRA
SAMEA14368414	PRJEB52710	2022-07-30	SRA
SAMEA14368417	PRJEB52710	2022-07-30	SRA
SAMEA14368419	PRJEB52710	2022-07-30	SRA
SAMEA14368421	PRJEB52710	2022-07-30	SRA
SAMEA14368422	PRJEB52710	2022-07-30	SRA
SAMEA14368423	PRJEB52710	2022-07-30	SRA
SAMEA14368425	PRJEB52710	2022-07-30	SRA
SAMEA14368427	PRJEB52710	2022-07-30	SRA
SAMEA14368428	PRJEB52710	2022-07-30	SRA
SAMEA14368430	PRJEB52710	2022-07-30	SRA
SAMEA14368432	PRJEB52710	2022-07-30	SRA
SAMEA14368433	PRJEB52710	2022-07-30	SRA
SAMEA14368435	PRJEB52710	2022-07-30	SRA
SAMEA2047900	PRJEB1419	2014-05-14	SRA
SAMEA2047901	PRJEB1419	2014-05-14	SRA
SAMEA2047902	PRJEB1419	2014-05-14	SRA
SAMEA2582698	PRJEB6377	2014-06-06	SRA
SAMEA2582699	PRJEB6377	2014-06-06	SRA
SAMEA2582700	PRJEB6377	2014-06-06	SRA
SAMEA2582701	PRJEB6377	2014-06-06	SRA
SAMEA2582702	PRJEB6377	2014-06-06	SRA
SAMEA2582703	PRJEB6377	2014-06-06	SRA
SAMEA2582704	PRJEB6377	2014-06-06	SRA
SAMEA2587593	PRJEB6504	2015-06-11	SRA
SAMEA2587594	PRJEB6504	2015-06-11	SRA
SAMEA2587595	PRJEB6504	2015-06-11	SRA
SAMEA2587596	PRJEB6504	2015-06-11	SRA
SAMEA2587597	PRJEB6504	2015-06-11	SRA
SAMEA2587598	PRJEB6504	2015-06-11	SRA
SAMEA2646392	PRJEB6732	2014-08-17	SRA
SAMEA2646393	PRJEB6732	2014-08-17	SRA
SAMEA2646394	PRJEB6732	2014-08-17	SRA
SAMEA2646395	PRJEB6732	2014-08-17	SRA
SAMEA2646396	PRJEB6732	2014-08-17	SRA
SAMEA2646397	PRJEB6732	2014-08-17	SRA
SAMEA2646398	PRJEB6732	2014-08-17	SRA
SAMEA2646399	PRJEB6732	2014-08-17	SRA
SAMEA2646400	PRJEB6732	2014-08-17	SRA
SAMEA2646401	PRJEB6732	2014-08-17	SRA
SAMEA2646402	PRJEB6732	2014-08-17	SRA
SAMEA2646403	PRJEB6732	2014-08-17	SRA
SAMEA2646404	PRJEB6732	2014-08-17	SRA
SAMEA2646405	PRJEB6732	2014-08-17	SRA
SAMEA2707836	PRJEB7014	2015-01-29	SRA
SAMEA2707837	PRJEB7014	2015-01-29	SRA
SAMEA2707838	PRJEB7014	2015-01-29	SRA
SAMEA2747169	PRJEB7173	2015-06-19	SRA
SAMEA2747170	PRJEB7173	2015-06-19	SRA
SAMEA2747171	PRJEB7173	2015-06-19	SRA
SAMEA2747172	PRJEB7173	2015-06-19	SRA
SAMEA2747173	PRJEB7173	2015-06-19	SRA
SAMEA2747174	PRJEB7173	2015-06-19	SRA
SAMEA2747175	PRJEB7173	2015-06-19	SRA
SAMEA2747176	PRJEB7173	2015-06-19	SRA
SAMEA3112153	PRJEB7695	2015-03-04	SRA
SAMEA3112173	PRJEB7696	2015-01-28	SRA
SAMEA3112174	PRJEB7696	2015-01-28	SRA
SAMEA3112175	PRJEB7696	2015-01-28	SRA
SAMEA3112176	PRJEB7696	2015-01-28	SRA
SAMEA3112177	PRJEB7696	2015-01-28	SRA
SAMEA3112178	PRJEB7696	2015-01-28	SRA
SAMEA3112179	PRJEB7696	2015-01-28	SRA
SAMEA3112180	PRJEB7696	2015-01-28	SRA
SAMEA3112181	PRJEB7696	2015-01-28	SRA
SAMEA3112182	PRJEB7696	2015-01-28	SRA
SAMEA3112183	PRJEB7696	2015-01-28	SRA
SAMEA3112184	PRJEB7696	2015-01-28	SRA
SAMEA3112185	PRJEB7696	2015-01-28	SRA
SAMEA3112186	PRJEB7696	2015-01-28	SRA
SAMEA3112187	PRJEB7696	2015-01-28	SRA
SAMEA3112188	PRJEB7696	2015-01-28	SRA
SAMEA3112189	PRJEB7696	2015-01-28	SRA
SAMEA3112190	PRJEB7696	2015-01-28	SRA
SAMEA3112191	PRJEB7696	2015-01-28	SRA
SAMEA3112192	PRJEB7696	2015-01-28	SRA
SAMEA3170987	PRJEB7104	2016-09-28	SRA
SAMEA3170988	PRJEB7104	2016-09-28	SRA
SAMEA3170990	PRJEB7104	2016-09-28	SRA
SAMEA3306037	PRJEB8831	2015-03-18	SRA
SAMEA3306038	PRJEB8831	2015-03-18	SRA
SAMEA3306039	PRJEB8831	2015-03-18	SRA
SAMEA3306040	PRJEB8831	2015-03-18	SRA
SAMEA3306041	PRJEB8831	2015-03-18	SRA
SAMEA3306042	PRJEB8831	2015-03-18	SRA
SAMEA3306043	PRJEB8831	2015-03-18	SRA
SAMEA3306044	PRJEB8831	2015-03-18	SRA
SAMEA3306045	PRJEB8831	2015-03-18	SRA
SAMEA3306046	PRJEB8831	2015-03-18	SRA
SAMEA3306047	PRJEB8831	2015-03-18	SRA
SAMEA3306048	PRJEB8831	2015-03-18	SRA
SAMEA3306049	PRJEB8831	2015-03-18	SRA
SAMEA3306050	PRJEB8831	2015-03-18	SRA
SAMEA3306051	PRJEB8831	2015-03-18	SRA
SAMEA3308496	PRJEB8831	2015-03-18	SRA
SAMEA3334636	PRJEB13366	2016-04-12	SRA
SAMEA3334637	PRJEB13366	2016-04-12	SRA
SAMEA3334638	PRJEB13366	2016-04-12	SRA
SAMEA3334639	PRJEB13366	2016-04-12	SRA
SAMEA3334640	PRJEB13366	2016-04-12	SRA
SAMEA3682661	PRJEB11965	2016-02-01	SRA
SAMEA3888733	PRJEB12943	2016-06-30	SRA
SAMEA3888734	PRJEB12943	2016-06-30	SRA
SAMEA3888735	PRJEB12943	2016-06-30	SRA
SAMEA3888736	PRJEB12943	2016-06-30	SRA
SAMEA3888737	PRJEB12943	2016-06-30	SRA
SAMEA3888738	PRJEB12943	2016-06-30	SRA
SAMEA3888739	PRJEB12943	2016-06-30	SRA
SAMEA3888740	PRJEB12943	2016-06-30	SRA
SAMEA3888741	PRJEB12943	2016-06-30	SRA
SAMEA3888742	PRJEB12943	2016-06-30	SRA
SAMEA3888743	PRJEB12943	2016-06-30	SRA
SAMEA3888744	PRJEB12943	2016-06-30	SRA
SAMEA3903350	PRJEB13074	2017-10-13	SRA
SAMEA3903351	PRJEB13074	2017-10-13	SRA
SAMEA3903352	PRJEB13074	2017-10-13	SRA
SAMEA3903378	PRJEB13074	2017-10-13	SRA
SAMEA3931975	PRJEB13582	2018-01-01	SRA
SAMEA3931976	PRJEB13582	2018-01-01	SRA
SAMEA3931977	PRJEB13582	2018-01-01	SRA
SAMEA3931978	PRJEB13582	2018-01-01	SRA
SAMEA3931979	PRJEB13582	2018-01-01	SRA
SAMEA3931980	PRJEB13582	2018-01-01	SRA
SAMEA3931981	PRJEB13582	2018-01-01	SRA
SAMEA3931982	PRJEB13582	2018-01-01	SRA
SAMEA4051551	PRJEB14606	2016-07-14	SRA
SAMEA4051552	PRJEB14606	2016-07-14	SRA
SAMEA4051553	PRJEB14606	2016-07-14	SRA
SAMEA4051554	PRJEB14606	2016-07-14	SRA
SAMEA4051555	PRJEB14606	2016-07-14	SRA
SAMEA4051556	PRJEB14606	2016-07-14	SRA
SAMEA4051557	PRJEB14606	2016-07-14	SRA
SAMEA4395184	PRJEB13188	2016-11-26	SRA
SAMEA4395185	PRJEB13188	2016-11-26	SRA
SAMEA4395186	PRJEB13188	2016-11-26	SRA
SAMEA4395187	PRJEB13188	2016-11-26	SRA
SAMEA4395188	PRJEB13188	2016-11-26	SRA
SAMEA4395189	PRJEB13188	2016-11-26	SRA
SAMEA4395190	PRJEB13188	2016-11-26	SRA
SAMEA4395191	PRJEB13188	2016-11-26	SRA
SAMEA4395192	PRJEB13188	2016-11-26	SRA
SAMEA4395193	PRJEB13188	2016-11-26	SRA
SAMEA4395194	PRJEB13188	2016-11-26	SRA
SAMEA4395195	PRJEB13188	2016-11-26	SRA
SAMEA4395196	PRJEB13188	2016-11-26	SRA
SAMEA4395197	PRJEB13188	2016-11-26	SRA
SAMEA4395198	PRJEB13188	2016-11-26	SRA
SAMEA4395199	PRJEB13188	2016-11-26	SRA
SAMEA4395200	PRJEB13188	2016-11-26	SRA
SAMEA4395201	PRJEB13188	2016-11-26	SRA
SAMEA4395202	PRJEB13188	2016-11-26	SRA
SAMEA4395203	PRJEB13188	2016-11-26	SRA
SAMEA4395204	PRJEB13188	2016-11-26	SRA
SAMEA4395205	PRJEB13188	2016-11-26	SRA
SAMEA4395206	PRJEB13188	2016-11-26	SRA
SAMEA4395207	PRJEB13188	2016-11-26	SRA
SAMEA4395208	PRJEB13188	2016-11-26	SRA
SAMEA4395209	PRJEB13188	2016-11-26	SRA
SAMEA4395210	PRJEB13188	2016-11-26	SRA
SAMEA4395211	PRJEB13188	2016-11-26	SRA
SAMEA4395212	PRJEB13188	2016-11-26	SRA
SAMEA4395213	PRJEB13188	2016-11-26	SRA
SAMEA4395214	PRJEB13188	2016-11-26	SRA
SAMEA4395215	PRJEB13188	2016-11-26	SRA
SAMEA4395216	PRJEB13188	2016-11-26	SRA
SAMEA4395217	PRJEB13188	2016-11-26	SRA
SAMEA4395218	PRJEB13188	2016-11-26	SRA
SAMEA4395219	PRJEB13188	2016-11-26	SRA
SAMEA4395220	PRJEB13188	2016-11-26	SRA
SAMEA4395221	PRJEB13188	2016-11-26	SRA
SAMEA4395222	PRJEB13188	2016-11-26	SRA
SAMEA4395223	PRJEB13188	2016-11-26	SRA
SAMEA4395224	PRJEB13188	2016-11-26	SRA
SAMEA4395225	PRJEB13188	2016-11-26	SRA
SAMEA4395226	PRJEB13188	2016-11-26	SRA
SAMEA4395227	PRJEB13188	2016-11-26	SRA
SAMEA4395228	PRJEB13188	2016-11-26	SRA
SAMEA4395229	PRJEB13188	2016-11-26	SRA
SAMEA4395230	PRJEB13188	2016-11-26	SRA
SAMEA4395231	PRJEB13188	2016-11-26	SRA
SAMEA4395232	PRJEB13188	2016-11-26	SRA
SAMEA4395233	PRJEB13188	2016-11-26	SRA
SAMEA4395234	PRJEB13188	2016-11-26	SRA
SAMEA4395235	PRJEB13188	2016-11-26	SRA
SAMEA4395236	PRJEB13188	2016-11-26	SRA
SAMEA4395237	PRJEB13188	2016-11-26	SRA
SAMEA4395238	PRJEB13188	2016-11-26	SRA
SAMEA4395239	PRJEB13188	2016-11-26	SRA
SAMEA4395240	PRJEB13188	2016-11-26	SRA
SAMEA4395241	PRJEB13188	2016-11-26	SRA
SAMEA4395242	PRJEB13188	2016-11-26	SRA
SAMEA4395243	PRJEB13188	2016-11-26	SRA
SAMEA4395244	PRJEB13188	2016-11-26	SRA
SAMEA4395245	PRJEB13188	2016-11-26	SRA
SAMEA4395246	PRJEB13188	2016-11-26	SRA
SAMEA4395247	PRJEB13188	2016-11-26	SRA
SAMEA4395248	PRJEB13188	2016-11-26	SRA
SAMEA4395249	PRJEB13188	2016-11-26	SRA
SAMEA4395250	PRJEB13188	2016-11-26	SRA
SAMEA4395251	PRJEB13188	2016-11-26	SRA
SAMEA4395252	PRJEB13188	2016-11-26	SRA
SAMEA4395253	PRJEB13188	2016-11-26	SRA
SAMEA4395254	PRJEB13188	2016-11-26	SRA
SAMEA4395255	PRJEB13188	2016-11-26	SRA
SAMEA4395256	PRJEB13188	2016-11-26	SRA
SAMEA4395257	PRJEB13188	2016-11-26	SRA
SAMEA4395258	PRJEB13188	2016-11-26	SRA
SAMEA4395259	PRJEB13188	2016-11-26	SRA
SAMEA4395260	PRJEB13188	2016-11-26	SRA
SAMEA4395261	PRJEB13188	2016-11-26	SRA
SAMEA4395262	PRJEB13188	2016-11-26	SRA
SAMEA4395263	PRJEB13188	2016-11-26	SRA
SAMEA4395264	PRJEB13188	2016-11-26	SRA
SAMEA4395265	PRJEB13188	2016-11-26	SRA
SAMEA4395266	PRJEB13188	2016-11-26	SRA
SAMEA4395267	PRJEB13188	2016-11-26	SRA
SAMEA4395268	PRJEB13188	2016-11-26	SRA
SAMEA4395269	PRJEB13188	2016-11-26	SRA
SAMEA4395270	PRJEB13188	2016-11-26	SRA
SAMEA4395271	PRJEB13188	2016-11-26	SRA
SAMEA4395272	PRJEB13188	2016-11-26	SRA
SAMEA4395273	PRJEB13188	2016-11-26	SRA
SAMEA4395274	PRJEB13188	2016-11-26	SRA
SAMEA4395275	PRJEB13188	2016-11-26	SRA
SAMEA4395276	PRJEB13188	2016-11-26	SRA
SAMEA4395277	PRJEB13188	2016-11-26	SRA
SAMEA4395278	PRJEB13188	2016-11-26	SRA
SAMEA4395279	PRJEB13188	2016-11-26	SRA
SAMEA4395280	PRJEB13188	2016-11-26	SRA
SAMEA4395281	PRJEB13188	2016-11-26	SRA
SAMEA4395282	PRJEB13188	2016-11-26	SRA
SAMEA4395283	PRJEB13188	2016-11-26	SRA
SAMEA4395284	PRJEB13188	2016-11-26	SRA
SAMEA4395285	PRJEB13188	2016-11-26	SRA
SAMEA4395286	PRJEB13188	2016-11-26	SRA
SAMEA4395287	PRJEB13188	2016-11-26	SRA
SAMEA4395288	PRJEB13188	2016-11-26	SRA
SAMEA4395289	PRJEB13188	2016-11-26	SRA
SAMEA4395290	PRJEB13188	2016-11-26	SRA
SAMEA4395291	PRJEB13188	2016-11-26	SRA
SAMEA4395292	PRJEB13188	2016-11-26	SRA
SAMEA4395293	PRJEB13188	2016-11-26	SRA
SAMEA4395294	PRJEB13188	2016-11-26	SRA
SAMEA4395295	PRJEB13188	2016-11-26	SRA
SAMEA4395296	PRJEB13188	2016-11-26	SRA
SAMEA4395297	PRJEB13188	2016-11-26	SRA
SAMEA4395298	PRJEB13188	2016-11-26	SRA
SAMEA4395299	PRJEB13188	2016-11-26	SRA
SAMEA4395300	PRJEB13188	2016-11-26	SRA
SAMEA4395301	PRJEB13188	2016-11-26	SRA
SAMEA4395302	PRJEB13188	2016-11-26	SRA
SAMEA4395303	PRJEB13188	2016-11-26	SRA
SAMEA4395304	PRJEB13188	2016-11-26	SRA
SAMEA4395305	PRJEB13188	2016-11-26	SRA
SAMEA4395306	PRJEB13188	2016-11-26	SRA
SAMEA4395307	PRJEB13188	2016-11-26	SRA
SAMEA4395308	PRJEB13188	2016-11-26	SRA
SAMEA4395309	PRJEB13188	2016-11-26	SRA
SAMEA4395310	PRJEB13188	2016-11-26	SRA
SAMEA4395311	PRJEB13188	2016-11-26	SRA
SAMEA4395312	PRJEB13188	2016-11-26	SRA
SAMEA4395313	PRJEB13188	2016-11-26	SRA
SAMEA4395314	PRJEB13188	2016-11-26	SRA
SAMEA4395315	PRJEB13188	2016-11-26	SRA
SAMEA4395316	PRJEB13188	2016-11-26	SRA
SAMEA4395317	PRJEB13188	2016-11-26	SRA
SAMEA4395318	PRJEB13188	2016-11-26	SRA
SAMEA4395319	PRJEB13188	2016-11-26	SRA
SAMEA4395320	PRJEB13188	2016-11-26	SRA
SAMEA4395321	PRJEB13188	2016-11-26	SRA
SAMEA4395322	PRJEB13188	2016-11-26	SRA
SAMEA4395323	PRJEB13188	2016-11-26	SRA
SAMEA4395324	PRJEB13188	2016-11-26	SRA
SAMEA4395325	PRJEB13188	2016-11-26	SRA
SAMEA4395326	PRJEB13188	2016-11-26	SRA
SAMEA4395327	PRJEB13188	2016-11-26	SRA
SAMEA4395328	PRJEB13188	2016-11-26	SRA
SAMEA4395329	PRJEB13188	2016-11-26	SRA
SAMEA4395330	PRJEB13188	2016-11-26	SRA
SAMEA4395331	PRJEB13188	2016-11-26	SRA
SAMEA4395332	PRJEB13188	2016-11-26	SRA
SAMEA4395333	PRJEB13188	2016-11-26	SRA
SAMEA4395334	PRJEB13188	2016-11-26	SRA
SAMEA4395335	PRJEB13188	2016-11-26	SRA
SAMEA4395336	PRJEB13188	2016-11-26	SRA
SAMEA4395337	PRJEB13188	2016-11-26	SRA
SAMEA4395338	PRJEB13188	2016-11-26	SRA
SAMEA4395339	PRJEB13188	2016-11-26	SRA
SAMEA4395340	PRJEB13188	2016-11-26	SRA
SAMEA4395341	PRJEB13188	2016-11-26	SRA
SAMEA4395342	PRJEB13188	2016-11-26	SRA
SAMEA4395343	PRJEB13188	2016-11-26	SRA
SAMEA4395344	PRJEB13188	2016-11-26	SRA
SAMEA4395345	PRJEB13188	2016-11-26	SRA
SAMEA4395346	PRJEB13188	2016-11-26	SRA
SAMEA4395347	PRJEB13188	2016-11-26	SRA
SAMEA4430986	PRJEB15314	2016-09-30	SRA
SAMEA4430987	PRJEB15314	2016-09-30	SRA
SAMEA4430988	PRJEB15314	2016-09-30	SRA
SAMEA4430989	PRJEB15314	2016-09-30	SRA
SAMEA4430990	PRJEB15314	2016-09-30	SRA
SAMEA4430991	PRJEB15314	2016-09-30	SRA
SAMEA4430992	PRJEB15314	2016-09-30	SRA
SAMEA4430993	PRJEB15314	2016-09-30	SRA
SAMEA4430994	PRJEB15314	2016-09-30	SRA
SAMEA4430995	PRJEB15314	2016-09-30	SRA
SAMEA4430996	PRJEB15314	2016-09-30	SRA
SAMEA4430997	PRJEB15314	2016-09-30	SRA
SAMEA4430998	PRJEB15314	2016-09-30	SRA
SAMEA4430999	PRJEB15314	2016-09-30	SRA
SAMEA4431000	PRJEB15314	2016-09-30	SRA
SAMEA4431001	PRJEB15314	2016-09-30	SRA
SAMEA4431002	PRJEB15314	2016-09-30	SRA
SAMEA4431003	PRJEB15314	2016-09-30	SRA
SAMEA4431004	PRJEB15314	2016-09-30	SRA
SAMEA4431005	PRJEB15314	2016-09-30	SRA
SAMEA4447756	PRJEB35127	2019-10-30	SRA
SAMEA4447759	PRJEB35127	2019-10-30	SRA
SAMEA4447760	PRJEB35127	2019-10-30	SRA
SAMEA4447761	PRJEB35127	2019-10-30	SRA
SAMEA4447762	PRJEB35127	2019-10-30	SRA
SAMEA4447763	PRJEB35127	2019-10-30	SRA
SAMEA4447764	PRJEB35127	2019-10-30	SRA
SAMEA4447765	PRJEB35127	2019-10-30	SRA
SAMEA4447766	PRJEB35127	2019-10-30	SRA
SAMEA4447767	PRJEB35127	2019-10-30	SRA
SAMEA4447768	PRJEB35127	2019-10-30	SRA
SAMEA4447769	PRJEB35127	2019-10-30	SRA
SAMEA4447771	PRJEB35127	2019-10-30	SRA
SAMEA4447772	PRJEB35127	2019-10-30	SRA
SAMEA4447773	PRJEB35127	2019-10-30	SRA
SAMEA4447774	PRJEB35127	2019-10-30	SRA
SAMEA4447775	PRJEB35127	2019-10-30	SRA
SAMEA4447776	PRJEB35127	2019-10-30	SRA
SAMEA4447777	PRJEB35127	2019-10-30	SRA
SAMEA4447778	PRJEB35127	2019-10-30	SRA
SAMEA4447779	PRJEB35127	2019-10-30	SRA
SAMEA4447780	PRJEB35127	2019-10-30	SRA
SAMEA4447782	PRJEB35127	2019-10-30	SRA
SAMEA4447783	PRJEB35127	2019-10-30	SRA
SAMEA4447786	PRJEB35127	2019-10-30	SRA
SAMEA4447787	PRJEB35127	2019-10-30	SRA
SAMEA4447788	PRJEB35127	2019-10-30	SRA
SAMEA4447789	PRJEB35127	2019-10-30	SRA
SAMEA4447790	PRJEB35127	2019-10-30	SRA
SAMEA4447791	PRJEB35127	2019-10-30	SRA
SAMEA4447792	PRJEB35127	2019-10-30	SRA
SAMEA4447793	PRJEB35127	2019-10-30	SRA
SAMEA4447796	PRJEB35127	2019-10-30	SRA
SAMEA4447797	PRJEB35127	2019-10-30	SRA
SAMEA4447798	PRJEB35127	2019-10-30	SRA
SAMEA4447800	PRJEB35127	2019-10-30	SRA
SAMEA4447801	PRJEB35127	2019-10-30	SRA
SAMEA4447802	PRJEB35127	2019-10-30	SRA
SAMEA4447803	PRJEB35127	2019-10-30	SRA
SAMEA4447804	PRJEB35127	2019-10-30	SRA
SAMEA4447805	PRJEB35127	2019-10-30	SRA
SAMEA4447806	PRJEB35127	2019-10-30	SRA
SAMEA4447807	PRJEB35127	2019-10-30	SRA
SAMEA4447808	PRJEB35127	2019-10-30	SRA
SAMEA4447809	PRJEB35127	2019-10-30	SRA
SAMEA4447812	PRJEB35127	2019-10-30	SRA
SAMEA4447813	PRJEB35127	2019-10-30	SRA
SAMEA4447814	PRJEB35127	2019-10-30	SRA
SAMEA4447815	PRJEB35127	2019-10-30	SRA
SAMEA4447816	PRJEB35127	2019-10-30	SRA
SAMEA4447817	PRJEB35127	2019-10-30	SRA
SAMEA4447818	PRJEB35127	2019-10-30	SRA
SAMEA4447819	PRJEB35127	2019-10-30	SRA
SAMEA4447820	PRJEB35127	2019-10-30	SRA
SAMEA4447821	PRJEB35127	2019-10-30	SRA
SAMEA4447822	PRJEB35127	2019-10-30	SRA
SAMEA4447823	PRJEB35127	2019-10-30	SRA
SAMEA4447824	PRJEB35127	2019-10-30	SRA
SAMEA4447826	PRJEB35127	2019-10-30	SRA
SAMEA4447827	PRJEB35127	2019-10-30	SRA
SAMEA4447828	PRJEB35127	2019-10-30	SRA
SAMEA4447829	PRJEB35127	2019-10-30	SRA
SAMEA4447830	PRJEB35127	2019-10-30	SRA
SAMEA4447831	PRJEB35127	2019-10-30	SRA
SAMEA4447833	PRJEB35127	2019-10-30	SRA
SAMEA4447834	PRJEB35127	2019-10-30	SRA
SAMEA4447835	PRJEB35127	2019-10-30	SRA
SAMEA4447836	PRJEB35127	2019-10-30	SRA
SAMEA4447837	PRJEB35127	2019-10-30	SRA
SAMEA4447838	PRJEB35127	2019-10-30	SRA
SAMEA4454616	PRJEB14330	2016-08-08	SRA
SAMEA4454627	PRJEB14330	2016-08-08	SRA
SAMEA4454667	PRJEB14330	2016-08-08	SRA
SAMEA4454678	PRJEB14330	2016-08-08	SRA
SAMEA4454781	PRJEB14330	2016-08-08	SRA
SAMEA4454784	PRJEB14330	2016-08-08	SRA
SAMEA4454909	PRJEB14330	2016-08-08	SRA
SAMEA4454929	PRJEB14330	2016-08-08	SRA
SAMEA4455415	PRJEB14330	2016-08-08	SRA
SAMEA4455423	PRJEB14330	2016-08-08	SRA
SAMEA4455432	PRJEB14330	2016-08-08	SRA
SAMEA4455442	PRJEB14330	2016-08-08	SRA
SAMEA4455451	PRJEB14330	2016-08-08	SRA
SAMEA4455455	PRJEB14330	2016-08-08	SRA
SAMEA4455466	PRJEB14330	2016-08-08	SRA
SAMEA4455469	PRJEB14330	2016-08-08	SRA
SAMEA4551975	PRJEB17968	2021-06-30	SRA
SAMEA4551976	PRJEB17968	2021-06-30	SRA
SAMEA4551977	PRJEB17968	2021-06-30	SRA
SAMEA4551978	PRJEB17968	2021-06-30	SRA
SAMEA4551979	PRJEB17968	2021-06-30	SRA
SAMEA4551980	PRJEB17968	2021-06-30	SRA
SAMEA4551981	PRJEB17968	2021-06-30	SRA
SAMEA4551982	PRJEB17968	2021-06-30	SRA
SAMEA4551983	PRJEB17968	2021-06-30	SRA
SAMEA4551984	PRJEB17968	2021-06-30	SRA
SAMEA4551985	PRJEB17968	2021-06-30	SRA
SAMEA4551986	PRJEB17968	2021-06-30	SRA
SAMEA4551987	PRJEB17968	2021-06-30	SRA
SAMEA4551988	PRJEB17968	2021-06-30	SRA
SAMEA4551989	PRJEB17968	2021-06-30	SRA
SAMEA4551990	PRJEB17968	2021-06-30	SRA
SAMEA4551991	PRJEB17968	2021-06-30	SRA
SAMEA4551992	PRJEB17968	2021-06-30	SRA
SAMEA4551993	PRJEB17968	2021-06-30	SRA
SAMEA4551994	PRJEB17968	2021-06-30	SRA
SAMEA4551995	PRJEB17968	2021-06-30	SRA
SAMEA4551996	PRJEB17968	2021-06-30	SRA
SAMEA4551997	PRJEB17968	2021-06-30	SRA
SAMEA4551998	PRJEB17968	2021-06-30	SRA
SAMEA4551999	PRJEB17968	2021-06-30	SRA
SAMEA4552000	PRJEB17968	2021-06-30	SRA
SAMEA4552001	PRJEB17968	2021-06-30	SRA
SAMEA4552002	PRJEB17968	2021-06-30	SRA
SAMEA4552003	PRJEB17968	2021-06-30	SRA
SAMEA4552004	PRJEB17968	2021-06-30	SRA
SAMEA4552005	PRJEB17968	2021-06-30	SRA
SAMEA4552006	PRJEB17968	2021-06-30	SRA
SAMEA4552007	PRJEB17968	2021-06-30	SRA
SAMEA4552008	PRJEB17968	2021-06-30	SRA
SAMEA4552009	PRJEB17968	2021-06-30	SRA
SAMEA4552010	PRJEB17968	2021-06-30	SRA
SAMEA4552011	PRJEB17968	2021-06-30	SRA
SAMEA4552012	PRJEB17968	2021-06-30	SRA
SAMEA4552013	PRJEB17968	2021-06-30	SRA
SAMEA4552014	PRJEB17968	2021-06-30	SRA
SAMEA4675134	PRJEB25677	2018-03-23	SRA
SAMEA4675135	PRJEB25677	2018-03-23	SRA
SAMEA4675136	PRJEB25677	2018-03-23	SRA
SAMEA4675137	PRJEB25677	2018-03-23	SRA
SAMEA4675138	PRJEB25677	2018-03-23	SRA
SAMEA4675139	PRJEB25677	2018-03-23	SRA
SAMEA4675140	PRJEB25677	2018-03-23	SRA
SAMEA4675141	PRJEB25677	2018-03-23	SRA
SAMEA4675142	PRJEB25677	2018-03-23	SRA
SAMEA4675143	PRJEB25677	2018-03-23	SRA
SAMEA4675144	PRJEB25677	2018-03-23	SRA
SAMEA4675145	PRJEB25677	2018-03-23	SRA
SAMEA4675146	PRJEB25677	2018-03-23	SRA
SAMEA4675148	PRJEB25677	2018-03-23	SRA
SAMEA4675150	PRJEB25677	2018-03-23	SRA
SAMEA4675151	PRJEB25677	2018-03-23	SRA
SAMEA4675152	PRJEB25677	2018-03-23	SRA
SAMEA4675153	PRJEB25677	2018-03-23	SRA
SAMEA4762811	PRJEB27493	2020-07-01	SRA
SAMEA4762812	PRJEB27493	2020-07-01	SRA
SAMEA4789893	PRJEB27764	2018-07-19	SRA
SAMEA4789894	PRJEB27764	2018-07-19	SRA
SAMEA4789895	PRJEB27764	2018-07-19	SRA
SAMEA4789896	PRJEB27764	2018-07-19	SRA
SAMEA4789897	PRJEB27764	2018-07-19	SRA
SAMEA4789898	PRJEB27764	2018-07-19	SRA
SAMEA4789899	PRJEB27764	2018-07-19	SRA
SAMEA4789900	PRJEB27764	2018-07-19	SRA
SAMEA4789901	PRJEB27764	2018-07-19	SRA
SAMEA4789902	PRJEB27764	2018-07-19	SRA
SAMEA4789903	PRJEB27764	2018-07-19	SRA
SAMEA4789904	PRJEB27764	2018-07-19	SRA
SAMEA4789905	PRJEB27764	2018-07-19	SRA
SAMEA4789906	PRJEB27764	2018-07-19	SRA
SAMEA4789907	PRJEB27764	2018-07-19	SRA
SAMEA4789908	PRJEB27764	2018-07-19	SRA
SAMEA4789909	PRJEB27764	2018-07-19	SRA
SAMEA4789910	PRJEB27764	2018-07-19	SRA
SAMEA4789911	PRJEB27764	2018-07-19	SRA
SAMEA4789912	PRJEB27764	2018-07-19	SRA
SAMEA4789913	PRJEB27764	2018-07-19	SRA
SAMEA4789914	PRJEB27764	2018-07-19	SRA
SAMEA4789915	PRJEB27764	2018-07-19	SRA
SAMEA4789916	PRJEB27764	2018-07-19	SRA
SAMEA4789917	PRJEB27764	2018-07-19	SRA
SAMEA4789919	PRJEB27764	2018-07-19	SRA
SAMEA4789920	PRJEB27764	2018-07-19	SRA
SAMEA4789921	PRJEB27764	2018-07-19	SRA
SAMEA4789922	PRJEB27764	2018-07-19	SRA
SAMEA4789923	PRJEB27764	2018-07-19	SRA
SAMEA4789924	PRJEB27764	2018-07-19	SRA
SAMEA4789925	PRJEB27764	2018-07-19	SRA
SAMEA4789926	PRJEB27764	2018-07-19	SRA
SAMEA4789927	PRJEB27764	2018-07-19	SRA
SAMEA4789928	PRJEB27764	2018-07-19	SRA
SAMEA4789929	PRJEB27764	2018-07-19	SRA
SAMEA4789930	PRJEB27764	2018-07-19	SRA
SAMEA4789931	PRJEB27764	2018-07-19	SRA
SAMEA4789932	PRJEB27764	2018-07-19	SRA
SAMEA4789933	PRJEB27764	2018-07-19	SRA
SAMEA4789934	PRJEB27764	2018-07-19	SRA
SAMEA4789935	PRJEB27764	2018-07-19	SRA
SAMEA4789936	PRJEB27764	2018-07-19	SRA
SAMEA4789937	PRJEB27764	2018-07-19	SRA
SAMEA4789938	PRJEB27764	2018-07-19	SRA
SAMEA4789939	PRJEB27764	2018-07-19	SRA
SAMEA4789940	PRJEB27764	2018-07-19	SRA
SAMEA4789941	PRJEB27764	2018-07-19	SRA
SAMEA4789942	PRJEB27764	2018-07-19	SRA
SAMEA4789943	PRJEB27764	2018-07-19	SRA
SAMEA4819581	PRJEB28074	2019-01-24	SRA
SAMEA4819582	PRJEB28074	2019-01-24	SRA
SAMEA4819583	PRJEB28074	2019-01-24	SRA
SAMEA4819584	PRJEB28074	2019-01-24	SRA
SAMEA4819585	PRJEB28074	2019-01-24	SRA
SAMEA4819586	PRJEB28074	2019-01-24	SRA
SAMEA4819587	PRJEB28074	2019-01-24	SRA
SAMEA4819588	PRJEB28074	2019-01-24	SRA
SAMEA4819589	PRJEB28074	2019-01-24	SRA
SAMEA4851284	PRJEB28324	2018-10-25	SRA
SAMEA4851285	PRJEB28324	2018-10-25	SRA
SAMEA4851286	PRJEB28324	2018-10-25	SRA
SAMEA4851287	PRJEB28324	2018-10-25	SRA
SAMEA4851288	PRJEB28324	2018-10-25	SRA
SAMEA4851289	PRJEB28324	2018-10-25	SRA
SAMEA4851290	PRJEB28324	2018-10-25	SRA
SAMEA4851291	PRJEB28324	2018-10-25	SRA
SAMEA4851292	PRJEB28324	2018-10-25	SRA
SAMEA4852426	PRJEB28324	2018-10-25	SRA
SAMEA4852427	PRJEB28324	2018-10-25	SRA
SAMEA4852428	PRJEB28324	2018-10-25	SRA
SAMEA4852429	PRJEB28324	2018-10-25	SRA
SAMEA4852430	PRJEB28324	2018-10-25	SRA
SAMEA4852431	PRJEB28324	2018-10-25	SRA
SAMEA4852432	PRJEB28324	2018-10-25	SRA
SAMEA4852433	PRJEB28324	2018-10-25	SRA
SAMEA4852434	PRJEB28324	2018-10-25	SRA
SAMEA4852435	PRJEB28324	2018-10-25	SRA
SAMEA4852436	PRJEB28324	2018-10-25	SRA
SAMEA4852437	PRJEB28324	2018-10-25	SRA
SAMEA4862008	PRJEB27337	2018-07-04	SRA
SAMEA4862010	PRJEB27337	2018-07-04	SRA
SAMEA4862012	PRJEB27337	2018-07-04	SRA
SAMEA4862013	PRJEB27337	2018-07-04	SRA
SAMEA4862015	PRJEB27337	2018-07-04	SRA
SAMEA4862016	PRJEB27337	2018-07-04	SRA
SAMEA4862017	PRJEB27337	2018-07-04	SRA
SAMEA4862018	PRJEB27337	2018-07-04	SRA
SAMEA4862019	PRJEB27337	2018-07-04	SRA
SAMEA4862020	PRJEB27337	2018-07-04	SRA
SAMEA4862022	PRJEB27337	2018-07-04	SRA
SAMEA4862023	PRJEB27337	2018-07-04	SRA
SAMEA4862024	PRJEB27337	2018-07-04	SRA
SAMEA4862025	PRJEB27337	2018-07-04	SRA
SAMEA4862026	PRJEB27337	2018-07-04	SRA
SAMEA4862027	PRJEB27337	2018-07-04	SRA
SAMEA4862028	PRJEB27337	2018-07-04	SRA
SAMEA4862029	PRJEB27337	2018-07-04	SRA
SAMEA4862030	PRJEB27337	2018-07-04	SRA
SAMEA4862031	PRJEB27337	2018-07-04	SRA
SAMEA4862032	PRJEB27337	2018-07-04	SRA
SAMEA4862033	PRJEB27337	2018-07-04	SRA
SAMEA4862034	PRJEB27337	2018-07-04	SRA
SAMEA4862035	PRJEB27337	2018-07-04	SRA
SAMEA4862036	PRJEB27337	2018-07-04	SRA
SAMEA4862037	PRJEB27337	2018-07-04	SRA
SAMEA4862038	PRJEB27337	2018-07-04	SRA
SAMEA4862041	PRJEB27337	2018-07-04	SRA
SAMEA4862043	PRJEB27337	2018-07-04	SRA
SAMEA4862044	PRJEB27337	2018-07-04	SRA
SAMEA4862045	PRJEB27337	2018-07-04	SRA
SAMEA4862046	PRJEB27337	2018-07-04	SRA
SAMEA4862047	PRJEB27337	2018-07-04	SRA
SAMEA4862049	PRJEB27337	2018-07-04	SRA
SAMEA4862050	PRJEB27337	2018-07-04	SRA
SAMEA4862051	PRJEB27337	2018-07-04	SRA
SAMEA4862053	PRJEB27337	2018-07-04	SRA
SAMEA4862054	PRJEB27337	2018-07-04	SRA
SAMEA4862055	PRJEB27337	2018-07-04	SRA
SAMEA4862057	PRJEB27337	2018-07-04	SRA
SAMEA4862058	PRJEB27337	2018-07-04	SRA
SAMEA4862060	PRJEB27337	2018-07-04	SRA
SAMEA4862061	PRJEB27337	2018-07-04	SRA
SAMEA4862063	PRJEB27337	2018-07-04	SRA
SAMEA4862064	PRJEB27337	2018-07-04	SRA
SAMEA4862065	PRJEB27337	2018-07-04	SRA
SAMEA4862066	PRJEB27337	2018-07-04	SRA
SAMEA4862067	PRJEB27337	2018-07-04	SRA
SAMEA4862068	PRJEB27337	2018-07-04	SRA
SAMEA4862069	PRJEB27337	2018-07-04	SRA
SAMEA4862070	PRJEB27337	2018-07-04	SRA
SAMEA4862071	PRJEB27337	2018-07-04	SRA
SAMEA4862072	PRJEB27337	2018-07-04	SRA
SAMEA4862074	PRJEB27337	2018-07-04	SRA
SAMEA4862075	PRJEB27337	2018-07-04	SRA
SAMEA4862076	PRJEB27337	2018-07-04	SRA
SAMEA4862077	PRJEB27337	2018-07-04	SRA
SAMEA4862079	PRJEB27337	2018-07-04	SRA
SAMEA4862080	PRJEB27337	2018-07-04	SRA
SAMEA4862081	PRJEB27337	2018-07-04	SRA
SAMEA4862083	PRJEB27337	2018-07-04	SRA
SAMEA4862084	PRJEB27337	2018-07-04	SRA
SAMEA4862085	PRJEB27337	2018-07-04	SRA
SAMEA4862086	PRJEB27337	2018-07-04	SRA
SAMEA4862087	PRJEB27337	2018-07-04	SRA
SAMEA4862088	PRJEB27337	2018-07-04	SRA
SAMEA4862089	PRJEB27337	2018-07-04	SRA
SAMEA4862090	PRJEB27337	2018-07-04	SRA
SAMEA4862091	PRJEB27337	2018-07-04	SRA
SAMEA4862092	PRJEB27337	2018-07-04	SRA
SAMEA4862094	PRJEB27337	2018-07-04	SRA
SAMEA4862095	PRJEB27337	2018-07-04	SRA
SAMEA4862096	PRJEB27337	2018-07-04	SRA
SAMEA4862097	PRJEB27337	2018-07-04	SRA
SAMEA4862098	PRJEB27337	2018-07-04	SRA
SAMEA4862099	PRJEB27337	2018-07-04	SRA
SAMEA4862100	PRJEB27337	2018-07-04	SRA
SAMEA4862101	PRJEB27337	2018-07-04	SRA
SAMEA4862102	PRJEB27337	2018-07-04	SRA
SAMEA4862103	PRJEB27337	2018-07-04	SRA
SAMEA4862105	PRJEB27337	2018-07-04	SRA
SAMEA4862106	PRJEB27337	2018-07-04	SRA
SAMEA4862107	PRJEB27337	2018-07-04	SRA
SAMEA4862108	PRJEB27337	2018-07-04	SRA
SAMEA4862109	PRJEB27337	2018-07-04	SRA
SAMEA4862110	PRJEB27337	2018-07-04	SRA
SAMEA4999482	PRJEB28653	2018-09-19	SRA
SAMEA4999485	PRJEB28653	2018-09-19	SRA
SAMEA4999487	PRJEB28653	2018-09-19	SRA
SAMEA4999488	PRJEB28653	2018-09-19	SRA
SAMEA4999489	PRJEB28653	2018-09-19	SRA
SAMEA4999493	PRJEB28653	2018-09-19	SRA
SAMEA4999494	PRJEB28653	2018-09-19	SRA
SAMEA4999496	PRJEB28653	2018-09-19	SRA
SAMEA4999498	PRJEB28653	2018-09-19	SRA
SAMEA4999499	PRJEB28653	2018-09-19	SRA
SAMEA4999502	PRJEB28653	2018-09-19	SRA
SAMEA4999504	PRJEB28653	2018-09-19	SRA
SAMEA4999505	PRJEB28653	2018-09-19	SRA
SAMEA4999512	PRJEB28653	2018-09-19	SRA
SAMEA4999513	PRJEB28653	2018-09-19	SRA
SAMEA4999517	PRJEB28653	2018-09-19	SRA
SAMEA4999518	PRJEB28653	2018-09-19	SRA
SAMEA4999520	PRJEB28653	2018-09-19	SRA
SAMEA4999521	PRJEB28653	2018-09-19	SRA
SAMEA4999523	PRJEB28653	2018-09-19	SRA
SAMEA4999524	PRJEB28653	2018-09-19	SRA
SAMEA4999526	PRJEB28653	2018-09-19	SRA
SAMEA4999527	PRJEB28653	2018-09-19	SRA
SAMEA4999528	PRJEB28653	2018-09-19	SRA
SAMEA4999529	PRJEB28653	2018-09-19	SRA
SAMEA4999530	PRJEB28653	2018-09-19	SRA
SAMEA4999531	PRJEB28653	2018-09-19	SRA
SAMEA4999533	PRJEB28653	2018-09-19	SRA
SAMEA4999536	PRJEB28653	2018-09-19	SRA
SAMEA4999540	PRJEB28653	2018-09-19	SRA
SAMEA4999541	PRJEB28653	2018-09-19	SRA
SAMEA4999542	PRJEB28653	2018-09-19	SRA
SAMEA4999543	PRJEB28653	2018-09-19	SRA
SAMEA4999545	PRJEB28653	2018-09-19	SRA
SAMEA4999546	PRJEB28653	2018-09-19	SRA
SAMEA4999548	PRJEB28653	2018-09-19	SRA
SAMEA4999550	PRJEB28653	2018-09-19	SRA
SAMEA4999554	PRJEB28653	2018-09-19	SRA
SAMEA4999555	PRJEB28653	2018-09-19	SRA
SAMEA4999556	PRJEB28653	2018-09-19	SRA
SAMEA4999557	PRJEB28653	2018-09-19	SRA
SAMEA4999559	PRJEB28653	2018-09-19	SRA
SAMEA4999561	PRJEB28653	2018-09-19	SRA
SAMEA4999562	PRJEB28653	2018-09-19	SRA
SAMEA4999565	PRJEB28653	2018-09-19	SRA
SAMEA4999566	PRJEB28653	2018-09-19	SRA
SAMEA4999567	PRJEB28653	2018-09-19	SRA
SAMEA4999568	PRJEB28653	2018-09-19	SRA
SAMEA4999570	PRJEB28653	2018-09-19	SRA
SAMEA4999572	PRJEB28653	2018-09-19	SRA
SAMEA4999574	PRJEB28653	2018-09-19	SRA
SAMEA4999575	PRJEB28653	2018-09-19	SRA
SAMEA4999578	PRJEB28653	2018-09-19	SRA
SAMEA4999579	PRJEB28653	2018-09-19	SRA
SAMEA4999583	PRJEB28653	2018-09-19	SRA
SAMEA4999584	PRJEB28653	2018-09-19	SRA
SAMEA4999588	PRJEB28653	2018-09-19	SRA
SAMEA4999589	PRJEB28653	2018-09-19	SRA
SAMEA4999592	PRJEB28653	2018-09-19	SRA
SAMEA4999593	PRJEB28653	2018-09-19	SRA
SAMEA4999594	PRJEB28653	2018-09-19	SRA
SAMEA4999597	PRJEB28653	2018-09-19	SRA
SAMEA4999600	PRJEB28653	2018-09-19	SRA
SAMEA4999604	PRJEB28653	2018-09-19	SRA
SAMEA4999605	PRJEB28653	2018-09-19	SRA
SAMEA4999607	PRJEB28653	2018-09-19	SRA
SAMEA4999608	PRJEB28653	2018-09-19	SRA
SAMEA4999610	PRJEB28653	2018-09-19	SRA
SAMEA4999611	PRJEB28653	2018-09-19	SRA
SAMEA4999613	PRJEB28653	2018-09-19	SRA
SAMEA5160178	PRJEB30263	2019-05-05	SRA
SAMEA5160179	PRJEB30263	2019-05-05	SRA
SAMEA5160180	PRJEB30263	2019-05-05	SRA
SAMEA5160181	PRJEB30263	2019-05-05	SRA
SAMEA5160182	PRJEB30263	2019-05-05	SRA
SAMEA5160183	PRJEB30263	2019-05-05	SRA
SAMEA5160184	PRJEB30263	2019-05-05	SRA
SAMEA5160185	PRJEB30263	2019-05-05	SRA
SAMEA5160186	PRJEB30263	2019-05-05	SRA
SAMEA5160187	PRJEB30263	2019-05-05	SRA
SAMEA5160188	PRJEB30263	2019-05-05	SRA
SAMEA5160189	PRJEB30263	2019-05-05	SRA
SAMEA5160190	PRJEB30263	2019-05-05	SRA
SAMEA5160191	PRJEB30263	2019-05-05	SRA
SAMEA5160192	PRJEB30263	2019-05-05	SRA
SAMEA5160193	PRJEB30263	2019-05-05	SRA
SAMEA5160194	PRJEB30263	2019-05-05	SRA
SAMEA5160195	PRJEB30263	2019-05-05	SRA
SAMEA5228024	PRJEB30839	2019-01-24	SRA
SAMEA5228025	PRJEB30839	2019-01-24	SRA
SAMEA5228026	PRJEB30839	2019-01-24	SRA
SAMEA5228027	PRJEB30839	2019-01-24	SRA
SAMEA5228028	PRJEB30839	2019-01-24	SRA
SAMEA5228029	PRJEB30839	2019-01-24	SRA
SAMEA5228030	PRJEB30839	2019-01-24	SRA
SAMEA5228031	PRJEB30839	2019-01-24	SRA
SAMEA5228032	PRJEB30839	2019-01-24	SRA
SAMEA5228033	PRJEB30839	2019-01-24	SRA
SAMEA5228034	PRJEB30839	2019-01-24	SRA
SAMEA5228035	PRJEB30839	2019-01-24	SRA
SAMEA5228036	PRJEB30839	2019-01-24	SRA
SAMEA5228037	PRJEB30839	2019-01-24	SRA
SAMEA5228038	PRJEB30839	2019-01-24	SRA
SAMEA5228039	PRJEB30839	2019-01-24	SRA
SAMEA5228040	PRJEB30839	2019-01-24	SRA
SAMEA5228041	PRJEB30839	2019-01-24	SRA
SAMEA5228042	PRJEB30839	2019-01-24	SRA
SAMEA5228043	PRJEB30839	2019-01-24	SRA
SAMEA5228044	PRJEB30839	2019-01-24	SRA
SAMEA5262714	PRJEB22535	2018-09-01	SRA
SAMEA5262715	PRJEB22535	2018-09-01	SRA
SAMEA5262717	PRJEB22535	2018-09-01	SRA
SAMEA5262718	PRJEB22535	2018-09-01	SRA
SAMEA5262719	PRJEB22535	2018-09-01	SRA
SAMEA5262722	PRJEB22535	2018-09-01	SRA
SAMEA5262727	PRJEB22535	2018-09-01	SRA
SAMEA5262728	PRJEB22535	2018-09-01	SRA
SAMEA5368895	PRJEB31379	2019-04-10	SRA
SAMEA5368896	PRJEB31379	2019-04-10	SRA
SAMEA5368897	PRJEB31379	2019-04-10	SRA
SAMEA5368898	PRJEB31379	2019-04-10	SRA
SAMEA5368899	PRJEB31379	2019-04-10	SRA
SAMEA5368900	PRJEB31379	2019-04-10	SRA
SAMEA5368901	PRJEB31379	2019-04-10	SRA
SAMEA5368902	PRJEB31379	2019-04-10	SRA
SAMEA5368903	PRJEB31379	2019-04-10	SRA
SAMEA5368904	PRJEB31379	2019-04-10	SRA
SAMEA5368905	PRJEB31379	2019-04-10	SRA
SAMEA5368906	PRJEB31379	2019-04-10	SRA
SAMEA5368907	PRJEB31379	2019-04-10	SRA
SAMEA5368908	PRJEB31379	2019-04-10	SRA
SAMEA5368909	PRJEB31379	2019-04-10	SRA
SAMEA5368910	PRJEB31379	2019-04-10	SRA
SAMEA5368911	PRJEB31379	2019-04-10	SRA
SAMEA5368912	PRJEB31379	2019-04-10	SRA
SAMEA5368913	PRJEB31379	2019-04-10	SRA
SAMEA5368914	PRJEB31379	2019-04-10	SRA
SAMEA5368915	PRJEB31379	2019-04-10	SRA
SAMEA5368916	PRJEB31379	2019-04-10	SRA
SAMEA5368917	PRJEB31379	2019-04-10	SRA
SAMEA5368919	PRJEB31379	2019-04-10	SRA
SAMEA5368920	PRJEB31379	2019-04-10	SRA
SAMEA5368921	PRJEB31379	2019-04-10	SRA
SAMEA5368922	PRJEB31379	2019-04-10	SRA
SAMEA5368923	PRJEB31379	2019-04-10	SRA
SAMEA5368924	PRJEB31379	2019-04-10	SRA
SAMEA5368925	PRJEB31379	2019-04-10	SRA
SAMEA5368926	PRJEB31379	2019-04-10	SRA
SAMEA5368927	PRJEB31379	2019-04-10	SRA
SAMEA5368928	PRJEB31379	2019-04-10	SRA
SAMEA5368929	PRJEB31379	2019-04-10	SRA
SAMEA5368930	PRJEB31379	2019-04-10	SRA
SAMEA5368931	PRJEB31379	2019-04-10	SRA
SAMEA5368932	PRJEB31379	2019-04-10	SRA
SAMEA5368933	PRJEB31379	2019-04-10	SRA
SAMEA5368934	PRJEB31379	2019-04-10	SRA
SAMEA5368935	PRJEB31379	2019-04-10	SRA
SAMEA5368936	PRJEB31379	2019-04-10	SRA
SAMEA5368937	PRJEB31379	2019-04-10	SRA
SAMEA5368938	PRJEB31379	2019-04-10	SRA
SAMEA5368939	PRJEB31379	2019-04-10	SRA
SAMEA5368940	PRJEB31379	2019-04-10	SRA
SAMEA5368941	PRJEB31379	2019-04-10	SRA
SAMEA5368942	PRJEB31379	2019-04-10	SRA
SAMEA5368943	PRJEB31379	2019-04-10	SRA
SAMEA5368944	PRJEB31379	2019-04-10	SRA
SAMEA5368945	PRJEB31379	2019-04-10	SRA
SAMEA5368946	PRJEB31379	2019-04-10	SRA
SAMEA5368947	PRJEB31379	2019-04-10	SRA
SAMEA5368948	PRJEB31379	2019-04-10	SRA
SAMEA5368949	PRJEB31379	2019-04-10	SRA
SAMEA5368950	PRJEB31379	2019-04-10	SRA
SAMEA5368951	PRJEB31379	2019-04-10	SRA
SAMEA5368952	PRJEB31379	2019-04-10	SRA
SAMEA5368953	PRJEB31379	2019-04-10	SRA
SAMEA5368954	PRJEB31379	2019-04-10	SRA
SAMEA5368955	PRJEB31379	2019-04-10	SRA
SAMEA5368956	PRJEB31379	2019-04-10	SRA
SAMEA5368957	PRJEB31379	2019-04-10	SRA
SAMEA5368958	PRJEB31379	2019-04-10	SRA
SAMEA5368959	PRJEB31379	2019-04-10	SRA
SAMEA5368960	PRJEB31379	2019-04-10	SRA
SAMEA5368961	PRJEB31379	2019-04-10	SRA
SAMEA5368962	PRJEB31379	2019-04-10	SRA
SAMEA5368963	PRJEB31379	2019-04-10	SRA
SAMEA5368964	PRJEB31379	2019-04-10	SRA
SAMEA5368965	PRJEB31379	2019-04-10	SRA
SAMEA5368966	PRJEB31379	2019-04-10	SRA
SAMEA5368967	PRJEB31379	2019-04-10	SRA
SAMEA5368968	PRJEB31379	2019-04-10	SRA
SAMEA5368969	PRJEB31379	2019-04-10	SRA
SAMEA5368970	PRJEB31379	2019-04-10	SRA
SAMEA5368971	PRJEB31379	2019-04-10	SRA
SAMEA5368972	PRJEB31379	2019-04-10	SRA
SAMEA5368973	PRJEB31379	2019-04-10	SRA
SAMEA5368974	PRJEB31379	2019-04-10	SRA
SAMEA5368975	PRJEB31379	2019-04-10	SRA
SAMEA5524119	PRJEB31626	2019-08-16	SRA
SAMEA5560271	PRJEB32022	2020-04-18	SRA
SAMEA5560272	PRJEB32022	2020-04-18	SRA
SAMEA5560273	PRJEB32022	2020-04-18	SRA
SAMEA5560274	PRJEB32022	2020-04-18	SRA
SAMEA5560275	PRJEB32022	2020-04-18	SRA
SAMEA5560276	PRJEB32022	2020-04-18	SRA
SAMEA5560277	PRJEB32022	2020-04-18	SRA
SAMEA5560278	PRJEB32022	2020-04-18	SRA
SAMEA5560279	PRJEB32022	2020-04-18	SRA
SAMEA5560280	PRJEB32022	2020-04-18	SRA
SAMEA5560281	PRJEB32022	2020-04-18	SRA
SAMEA5560282	PRJEB32022	2020-04-18	SRA
SAMEA5560283	PRJEB32022	2020-04-18	SRA
SAMEA5560284	PRJEB32022	2020-04-18	SRA
SAMEA5560285	PRJEB32022	2020-04-18	SRA
SAMEA5560286	PRJEB32022	2020-04-18	SRA
SAMEA5560287	PRJEB32022	2020-04-18	SRA
SAMEA5560288	PRJEB32022	2020-04-18	SRA
SAMEA5560289	PRJEB32022	2020-04-18	SRA
SAMEA5560290	PRJEB32022	2020-04-18	SRA
SAMEA5560291	PRJEB32022	2020-04-18	SRA
SAMEA5560292	PRJEB32022	2020-04-18	SRA
SAMEA5560293	PRJEB32022	2020-04-18	SRA
SAMEA5560294	PRJEB32022	2020-04-18	SRA
SAMEA5560295	PRJEB32022	2020-04-18	SRA
SAMEA5560296	PRJEB32022	2020-04-18	SRA
SAMEA5560297	PRJEB32022	2020-04-18	SRA
SAMEA5560298	PRJEB32022	2020-04-18	SRA
SAMEA5560299	PRJEB32022	2020-04-18	SRA
SAMEA5560300	PRJEB32022	2020-04-18	SRA
SAMEA5560301	PRJEB32022	2020-04-18	SRA
SAMEA5560302	PRJEB32022	2020-04-18	SRA
SAMEA5560303	PRJEB32022	2020-04-18	SRA
SAMEA5560304	PRJEB32022	2020-04-18	SRA
SAMEA5560305	PRJEB32022	2020-04-18	SRA
SAMEA5560306	PRJEB32022	2020-04-18	SRA
SAMEA5560307	PRJEB32022	2020-04-18	SRA
SAMEA5560308	PRJEB32022	2020-04-18	SRA
SAMEA5560309	PRJEB32022	2020-04-18	SRA
SAMEA5560310	PRJEB32022	2020-04-18	SRA
SAMEA5560311	PRJEB32022	2020-04-18	SRA
SAMEA5560312	PRJEB32022	2020-04-18	SRA
SAMEA5560313	PRJEB32022	2020-04-18	SRA
SAMEA5560314	PRJEB32022	2020-04-18	SRA
SAMEA5560315	PRJEB32022	2020-04-18	SRA
SAMEA5560316	PRJEB32022	2020-04-18	SRA
SAMEA5560317	PRJEB32022	2020-04-18	SRA
SAMEA5560318	PRJEB32022	2020-04-18	SRA
SAMEA5560319	PRJEB32022	2020-04-18	SRA
SAMEA5560320	PRJEB32022	2020-04-18	SRA
SAMEA5560321	PRJEB32022	2020-04-18	SRA
SAMEA5560322	PRJEB32022	2020-04-18	SRA
SAMEA5560323	PRJEB32022	2020-04-18	SRA
SAMEA5560324	PRJEB32022	2020-04-18	SRA
SAMEA5560325	PRJEB32022	2020-04-18	SRA
SAMEA5560326	PRJEB32022	2020-04-18	SRA
SAMEA5560327	PRJEB32022	2020-04-18	SRA
SAMEA5560328	PRJEB32022	2020-04-18	SRA
SAMEA5560329	PRJEB32022	2020-04-18	SRA
SAMEA5560330	PRJEB32022	2020-04-18	SRA
SAMEA5567753	PRJEB32183	2019-09-03	SRA
SAMEA5567754	PRJEB32183	2019-09-03	SRA
SAMEA5567755	PRJEB32183	2019-09-03	SRA
SAMEA5567756	PRJEB32183	2019-09-03	SRA
SAMEA5567757	PRJEB32183	2019-09-03	SRA
SAMEA5567758	PRJEB32183	2019-09-03	SRA
SAMEA5567759	PRJEB32183	2019-09-03	SRA
SAMEA5567760	PRJEB32183	2019-09-03	SRA
SAMEA5567761	PRJEB32183	2019-09-03	SRA
SAMEA5567762	PRJEB32183	2019-09-03	SRA
SAMEA5567763	PRJEB32183	2019-09-03	SRA
SAMEA5567764	PRJEB32183	2019-09-03	SRA
SAMEA5567765	PRJEB32183	2019-09-03	SRA
SAMEA5567766	PRJEB32183	2019-09-03	SRA
SAMEA5702875	PRJEB32956	2019-12-16	SRA
SAMEA5702876	PRJEB32956	2019-12-16	SRA
SAMEA5702877	PRJEB32956	2019-12-16	SRA
SAMEA5702878	PRJEB32956	2019-12-16	SRA
SAMEA5702879	PRJEB32956	2019-12-16	SRA
SAMEA5702880	PRJEB32956	2019-12-16	SRA
SAMEA5702881	PRJEB32956	2019-12-16	SRA
SAMEA5702882	PRJEB32956	2019-12-16	SRA
SAMEA5702883	PRJEB32956	2019-12-16	SRA
SAMEA5702884	PRJEB32956	2019-12-16	SRA
SAMEA5702885	PRJEB32956	2019-12-16	SRA
SAMEA5702886	PRJEB32956	2019-12-16	SRA
SAMEA5702887	PRJEB32956	2019-12-16	SRA
SAMEA5702888	PRJEB32956	2019-12-16	SRA
SAMEA5702889	PRJEB32956	2019-12-16	SRA
SAMEA5702890	PRJEB32956	2019-12-16	SRA
SAMEA5702891	PRJEB32956	2019-12-16	SRA
SAMEA5702892	PRJEB32956	2019-12-16	SRA
SAMEA5702893	PRJEB32956	2019-12-16	SRA
SAMEA5702894	PRJEB32956	2019-12-16	SRA
SAMEA5702895	PRJEB32956	2019-12-16	SRA
SAMEA5702896	PRJEB32956	2019-12-16	SRA
SAMEA5702897	PRJEB32956	2019-12-16	SRA
SAMEA5702898	PRJEB32956	2019-12-16	SRA
SAMEA5735692	PRJEB33196	2019-11-27	SRA
SAMEA5735693	PRJEB33196	2019-11-27	SRA
SAMEA5735694	PRJEB33196	2019-11-27	SRA
SAMEA5735695	PRJEB33196	2019-11-27	SRA
SAMEA5735696	PRJEB33196	2019-11-27	SRA
SAMEA5735697	PRJEB33196	2019-11-27	SRA
SAMEA5735698	PRJEB33196	2019-11-27	SRA
SAMEA5735699	PRJEB33196	2019-11-27	SRA
SAMEA5735700	PRJEB33196	2019-11-27	SRA
SAMEA5735701	PRJEB33196	2019-11-27	SRA
SAMEA5735702	PRJEB33196	2019-11-27	SRA
SAMEA5735703	PRJEB33196	2019-11-27	SRA
SAMEA5735704	PRJEB33196	2019-11-27	SRA
SAMEA5735705	PRJEB33196	2019-11-27	SRA
SAMEA5735706	PRJEB33196	2019-11-27	SRA
SAMEA5735707	PRJEB33196	2019-11-27	SRA
SAMEA5735708	PRJEB33196	2019-11-27	SRA
SAMEA5735709	PRJEB33196	2019-11-27	SRA
SAMEA5735710	PRJEB33196	2019-11-27	SRA
SAMEA5735711	PRJEB33196	2019-11-27	SRA
SAMEA5735712	PRJEB33196	2019-11-27	SRA
SAMEA5735713	PRJEB33196	2019-11-27	SRA
SAMEA5735714	PRJEB33196	2019-11-27	SRA
SAMEA5735715	PRJEB33196	2019-11-27	SRA
SAMEA5735716	PRJEB33196	2019-11-27	SRA
SAMEA5735717	PRJEB33196	2019-11-27	SRA
SAMEA5735718	PRJEB33196	2019-11-27	SRA
SAMEA5735719	PRJEB33196	2019-11-27	SRA
SAMEA5735720	PRJEB33196	2019-11-27	SRA
SAMEA5735721	PRJEB33196	2019-11-27	SRA
SAMEA5735722	PRJEB33196	2019-11-27	SRA
SAMEA5735723	PRJEB33196	2019-11-27	SRA
SAMEA5735724	PRJEB33196	2019-11-27	SRA
SAMEA5735725	PRJEB33196	2019-11-27	SRA
SAMEA5735726	PRJEB33196	2019-11-27	SRA
SAMEA5735727	PRJEB33196	2019-11-27	SRA
SAMEA5735728	PRJEB33196	2019-11-27	SRA
SAMEA5735729	PRJEB33196	2019-11-27	SRA
SAMEA5735730	PRJEB33196	2019-11-27	SRA
SAMEA5735731	PRJEB33196	2019-11-27	SRA
SAMEA5735732	PRJEB33196	2019-11-27	SRA
SAMEA5735733	PRJEB33196	2019-11-27	SRA
SAMEA5735734	PRJEB33196	2019-11-27	SRA
SAMEA5735735	PRJEB33196	2019-11-27	SRA
SAMEA5735736	PRJEB33196	2019-11-27	SRA
SAMEA5735737	PRJEB33196	2019-11-27	SRA
SAMEA5735738	PRJEB33196	2019-11-27	SRA
SAMEA5735739	PRJEB33196	2019-11-27	SRA
SAMEA5735740	PRJEB33196	2019-11-27	SRA
[truncated: 25,683 more rows]

## Sheet: Supplementary_Table_2
Supplementary Table 2. Metadata of 27,681 public RNA-seq samples
BioSample	Organism	LibraryLayout	Breed_Class	Age	Sex	Platform	Model	Tissue/Cell_subtypes	Tissue_class/Cell_type	Organ_System	Match_cluster	Corrected_Tissue	Corrected_System	Predict_Breed	Predict_Sex
SAMD00000728	Bos taurus	SINGLE	Unknown	Unknown	Female	ILLUMINA	Illumina Genome Analyzer II	Granulosa	Granulosa	Female Reproductive System	True	Granulosa	Female Reproductive System	Japanese Black	Female
SAMD00010929	Bos taurus	SINGLE	Unknown	Unknown	Unknown	ABI_SOLID	AB SOLiD 4 System	Inner Cell Mass	Embryo	Embryo	Low_quality	Embryo	Embryo	Unknown	Unknown
SAMD00011318	Bos taurus	SINGLE	Unknown	Unknown	Female	ILLUMINA	Illumina Genome Analyzer II	Oocyte	Oocyte	Female Reproductive System	True	Oocyte	Female Reproductive System	Japanese Black	Female
SAMD00011319	Bos taurus	SINGLE	Unknown	Unknown	Female	ILLUMINA	Illumina Genome Analyzer II	Oocyte	Oocyte	Female Reproductive System	True	Oocyte	Female Reproductive System	Japanese Black	Female
SAMD00011320	Bos taurus	PAIRED	Unknown	Unknown	Unknown	ILLUMINA	Illumina HiSeq 2000	Embryo	Embryo	Embryo	True	Embryo	Embryo	Japanese Black	Female
SAMD00012691	Bos taurus	SINGLE	Unknown	Unknown	Female	ILLUMINA	Illumina HiSeq 2000	Granulosa	Granulosa	Female Reproductive System	True	Granulosa	Female Reproductive System	Japanese Black	Female
SAMD00012692	Bos taurus	SINGLE	Unknown	Unknown	Female	ILLUMINA	Illumina HiSeq 2000	Granulosa	Granulosa	Female Reproductive System	True	Granulosa	Female Reproductive System	Japanese Black	Female
SAMD00012693	Bos taurus	SINGLE	Unknown	Unknown	Female	ILLUMINA	Illumina HiSeq 2000	Granulosa	Granulosa	Female Reproductive System	True	Granulosa	Female Reproductive System	Japanese Black	Female
SAMD00016898	Bos taurus	SINGLE	Unknown	Unknown	Female	ILLUMINA	Illumina HiSeq 2500	Granulosa	Granulosa	Female Reproductive System	True	Granulosa	Female Reproductive System	Japanese Black	Female
SAMD00016899	Bos taurus	SINGLE	Unknown	Unknown	Female	ILLUMINA	Illumina HiSeq 2500	Granulosa	Granulosa	Female Reproductive System	True	Granulosa	Female Reproductive System	Japanese Black	Female
SAMD00016900	Bos taurus	SINGLE	Unknown	Unknown	Female	ILLUMINA	Illumina HiSeq 2500	Granulosa	Granulosa	Female Reproductive System	True	Granulosa	Female Reproductive System	Japanese Black	Female
SAMD00016901	Bos taurus	SINGLE	Unknown	Unknown	Female	ILLUMINA	Illumina HiSeq 2500	Granulosa	Granulosa	Female Reproductive System	True	Granulosa	Female Reproductive System	Japanese Black	Female
SAMD00016902	Bos taurus	SINGLE	Unknown	Unknown	Female	ILLUMINA	Illumina HiSeq 2500	Granulosa	Granulosa	Female Reproductive System	True	Granulosa	Female Reproductive System	Japanese Black	Female
SAMD00016903	Bos taurus	SINGLE	Unknown	Unknown	Female	ILLUMINA	Illumina HiSeq 2500	Granulosa	Granulosa	Female Reproductive System	True	Granulosa	Female Reproductive System	Japanese Black	Female
SAMD00071621	Bos taurus	SINGLE	Unknown	Unknown	Female	ILLUMINA	Illumina HiSeq 2500	Endometrial Epithelial Cells	Endometrium	Female Reproductive System	False	Cell Line	Cell Line	Japanese Black	Female
SAMD00071622	Bos taurus	SINGLE	Unknown	Unknown	Female	ILLUMINA	Illumina HiSeq 2500	Endometrial Epithelial Cells	Endometrium	Female Reproductive System	False	Cell Line	Cell Line	Japanese Black	Female
SAMD00071623	Bos taurus	SINGLE	Unknown	Unknown	Female	ILLUMINA	Illumina HiSeq 2500	Endometrial Epithelial Cells	Endometrium	Female Reproductive System	False	Cell Line	Cell Line	Japanese Black	Female
SAMD00096874	Bos taurus	SINGLE	Japanese Black	Unknown	Unknown	ILLUMINA	Illumina HiSeq 2500	Embryo	Embryo	Embryo	True	Embryo	Embryo	Japanese Black	Female
SAMD00096875	Bos taurus	SINGLE	Japanese Black	Unknown	Unknown	ILLUMINA	Illumina HiSeq 2500	Embryo	Embryo	Embryo	True	Embryo	Embryo	Japanese Black	Female
SAMD00096876	Bos taurus	SINGLE	Japanese Black	Unknown	Unknown	ILLUMINA	Illumina HiSeq 2500	Embryo	Embryo	Embryo	True	Embryo	Embryo	Japanese Black	Female
SAMD00106906	Bos taurus	SINGLE	Japanese Black	Unknown	Female	ILLUMINA	Illumina HiSeq 2500	Cumulus	Cumulus	Female Reproductive System	True	Cumulus	Female Reproductive System	Japanese Black	Female
SAMD00106907	Bos taurus	SINGLE	Japanese Black	Unknown	Female	ILLUMINA	Illumina HiSeq 2500	Cumulus	Cumulus	Female Reproductive System	True	Cumulus	Female Reproductive System	Japanese Black	Female
SAMD00106908	Bos taurus	SINGLE	Japanese Black	Unknown	Female	ILLUMINA	Illumina HiSeq 2500	Oocyte	Oocyte	Female Reproductive System	True	Oocyte	Female Reproductive System	Japanese Black	Female
SAMD00106909	Bos taurus	SINGLE	Japanese Black	Unknown	Female	ILLUMINA	Illumina HiSeq 2500	Oocyte	Oocyte	Female Reproductive System	True	Oocyte	Female Reproductive System	Japanese Black	Female
SAMD00112301	Bos taurus	SINGLE	Holstein	Unknown	Female	ILLUMINA	Illumina HiSeq 2500	Uterine Cervix	Uterus	Female Reproductive System	True	Uterus	Female Reproductive System	Holstein	Female
SAMD00112302	Bos taurus	SINGLE	Holstein	Unknown	Female	ILLUMINA	Illumina HiSeq 2500	Uterine Cervix	Uterus	Female Reproductive System	True	Uterus	Female Reproductive System	Holstein	Female
SAMD00112303	Bos taurus	SINGLE	Holstein	Unknown	Female	ILLUMINA	Illumina HiSeq 2500	Uterine Cervix	Uterus	Female Reproductive System	True	Uterus	Female Reproductive System	Holstein	Female
SAMD00112304	Bos taurus	SINGLE	Holstein	Unknown	Female	ILLUMINA	Illumina HiSeq 2500	Uterine Cervix	Uterus	Female Reproductive System	True	Uterus	Female Reproductive System	Holstein	Female
SAMD00112305	Bos taurus	SINGLE	Holstein	Unknown	Female	ILLUMINA	Illumina HiSeq 2500	Uterine Cervix	Uterus	Female Reproductive System	True	Uterus	Female Reproductive System	Holstein	Female
SAMD00112306	Bos taurus	SINGLE	Holstein	Unknown	Female	ILLUMINA	Illumina HiSeq 2500	Uterine Cervix	Uterus	Female Reproductive System	True	Uterus	Female Reproductive System	Holstein	Female
SAMD00112307	Bos taurus	SINGLE	Holstein	Unknown	Female	ILLUMINA	Illumina HiSeq 2500	Vaginal Vestibule	Vagina	Female Reproductive System	True	Vagina	Female Reproductive System	Holstein	Female
SAMD00112308	Bos taurus	SINGLE	Holstein	Unknown	Female	ILLUMINA	Illumina HiSeq 2500	Vaginal Vestibule	Vagina	Female Reproductive System	True	Vagina	Female Reproductive System	Holstein	Female
SAMD00112309	Bos taurus	SINGLE	Holstein	Unknown	Female	ILLUMINA	Illumina HiSeq 2500	Vaginal Vestibule	Vagina	Female Reproductive System	True	Vagina	Female Reproductive System	Holstein	Female
SAMD00112310	Bos taurus	SINGLE	Holstein	Unknown	Female	ILLUMINA	Illumina HiSeq 2500	Vaginal Vestibule	Vagina	Female Reproductive System	True	Vagina	Female Reproductive System	Holstein	Female
SAMD00112311	Bos taurus	SINGLE	Holstein	Unknown	Female	ILLUMINA	Illumina HiSeq 2500	Vaginal Vestibule	Vagina	Female Reproductive System	True	Vagina	Female Reproductive System	Holstein	Female
SAMD00112312	Bos taurus	SINGLE	Holstein	Unknown	Female	ILLUMINA	Illumina HiSeq 2500	Vaginal Vestibule	Vagina	Female Reproductive System	True	Vagina	Female Reproductive System	Holstein	Female
SAMD00156667	Bos taurus	SINGLE	Unknown	Unknown	Female	ILLUMINA	Illumina HiSeq 2500	Endometrium	Uterus	Female Reproductive System	True	Uterus	Female Reproductive System	Holstein	Female
SAMD00156668	Bos taurus	SINGLE	Unknown	Unknown	Female	ILLUMINA	Illumina HiSeq 2500	Endometrium	Uterus	Female Reproductive System	True	Uterus	Female Reproductive System	Holstein	Female
SAMD00156669	Bos taurus	SINGLE	Unknown	Unknown	Female	ILLUMINA	Illumina HiSeq 2500	Endometrium	Uterus	Female Reproductive System	True	Uterus	Female Reproductive System	Holstein	Female
SAMD00156670	Bos taurus	SINGLE	Unknown	Unknown	Female	ILLUMINA	Illumina HiSeq 2500	Endometrium	Uterus	Female Reproductive System	True	Uterus	Female Reproductive System	Holstein	Female
SAMD00156671	Bos taurus	SINGLE	Unknown	Unknown	Female	ILLUMINA	Illumina HiSeq 2500	Endometrium	Uterus	Female Reproductive System	True	Uterus	Female Reproductive System	Holstein	Female
SAMD00156672	Bos taurus	SINGLE	Unknown	Unknown	Female	ILLUMINA	Illumina HiSeq 2500	Endometrium	Uterus	Female Reproductive System	True	Uterus	Female Reproductive System	Holstein	Female
SAMD00166949	Bos taurus	PAIRED	Unknown	Unknown	Female	ILLUMINA	Illumina NovaSeq 6000	Endometrial Epithelial Cells	Endometrium	Female Reproductive System	False	Cell Line	Cell Line	Japanese Black	Female
SAMD00166950	Bos taurus	PAIRED	Unknown	Unknown	Female	ILLUMINA	Illumina NovaSeq 6000	Endometrial Epithelial Cells	Endometrium	Female Reproductive System	False	Cell Line	Cell Line	Japanese Black	Female
SAMD00166951	Bos taurus	PAIRED	Unknown	Unknown	Female	ILLUMINA	Illumina NovaSeq 6000	Endometrial Epithelial Cells	Endometrium	Female Reproductive System	False	Cell Line	Cell Line	Japanese Black	Female
SAMD00166952	Bos taurus	PAIRED	Unknown	Unknown	Female	ILLUMINA	Illumina NovaSeq 6000	Endometrial Epithelial Cells	Endometrium	Female Reproductive System	False	Cell Line	Cell Line	Japanese Black	Female
SAMD00166953	Bos taurus	PAIRED	Unknown	Unknown	Female	ILLUMINA	Illumina NovaSeq 6000	Endometrial Epithelial Cells	Endometrium	Female Reproductive System	False	Cell Line	Cell Line	Japanese Black	Female
SAMD00166954	Bos taurus	PAIRED	Unknown	Unknown	Female	ILLUMINA	Illumina NovaSeq 6000	Endometrial Epithelial Cells	Endometrium	Female Reproductive System	False	Cell Line	Cell Line	Japanese Black	Female
SAMD00166955	Bos taurus	PAIRED	Unknown	Unknown	Female	ILLUMINA	Illumina NovaSeq 6000	Endometrial Epithelial Cells	Endometrium	Female Reproductive System	False	Cell Line	Cell Line	Japanese Black	Female
SAMD00166956	Bos taurus	PAIRED	Unknown	Unknown	Female	ILLUMINA	Illumina NovaSeq 6000	Endometrial Epithelial Cells	Endometrium	Female Reproductive System	False	Cell Line	Cell Line	Japanese Black	Female
SAMD00166957	Bos taurus	PAIRED	Unknown	Unknown	Female	ILLUMINA	Illumina NovaSeq 6000	Endometrial Epithelial Cells	Endometrium	Female Reproductive System	False	Cell Line	Cell Line	Japanese Black	Female
SAMD00166958	Bos taurus	PAIRED	Unknown	Unknown	Female	ILLUMINA	Illumina NovaSeq 6000	Endometrial Epithelial Cells	Endometrium	Female Reproductive System	False	Cell Line	Cell Line	Japanese Black	Female
SAMD00166959	Bos taurus	PAIRED	Unknown	Unknown	Female	ILLUMINA	Illumina NovaSeq 6000	Endometrial Epithelial Cells	Endometrium	Female Reproductive System	False	Cell Line	Cell Line	Japanese Black	Female
SAMD00166960	Bos taurus	PAIRED	Unknown	Unknown	Female	ILLUMINA	Illumina NovaSeq 6000	Endometrial Epithelial Cells	Endometrium	Female Reproductive System	False	Cell Line	Cell Line	Japanese Black	Female
SAMD00166961	Bos taurus	PAIRED	Unknown	Unknown	Female	ILLUMINA	Illumina NovaSeq 6000	Endometrial Epithelial Cells	Endometrium	Female Reproductive System	False	Cell Line	Cell Line	Japanese Black	Female
SAMD00166962	Bos taurus	PAIRED	Unknown	Unknown	Female	ILLUMINA	Illumina NovaSeq 6000	Endometrial Epithelial Cells	Endometrium	Female Reproductive System	False	Cell Line	Cell Line	Japanese Black	Female
SAMD00166963	Bos taurus	PAIRED	Unknown	Unknown	Female	ILLUMINA	Illumina NovaSeq 6000	Endometrial Epithelial Cells	Endometrium	Female Reproductive System	False	Cell Line	Cell Line	Japanese Black	Female
SAMD00178009	Bos taurus	PAIRED	Unknown	Unknown	Unknown	ILLUMINA	Illumina HiSeq 2500	Blastocyst	Embryo	Embryo	True	Embryo	Embryo	Holstein	Female
SAMD00178010	Bos taurus	PAIRED	Unknown	Unknown	Unknown	ILLUMINA	Illumina HiSeq 2500	Blastocyst	Embryo	Embryo	True	Embryo	Embryo	Holstein	Female
SAMD00178011	Bos taurus	PAIRED	Unknown	Unknown	Unknown	ILLUMINA	Illumina HiSeq 2500	Blastocyst	Embryo	Embryo	True	Embryo	Embryo	Holstein	Female
SAMD00178012	Bos taurus	PAIRED	Unknown	Unknown	Unknown	ILLUMINA	Illumina HiSeq 2500	Inner Cell Mass	Embryo	Embryo	True	Embryo	Embryo	Holstein	Female
SAMD00178013	Bos taurus	PAIRED	Unknown	Unknown	Unknown	ILLUMINA	Illumina HiSeq 2500	Inner Cell Mass	Embryo	Embryo	True	Embryo	Embryo	Holstein	Female
SAMD00178014	Bos taurus	PAIRED	Unknown	Unknown	Unknown	ILLUMINA	Illumina HiSeq 2500	Inner Cell Mass	Embryo	Embryo	True	Embryo	Embryo	Holstein	Female
SAMD00209823	Bos taurus	SINGLE	Unknown	Unknown	Unknown	ILLUMINA	Illumina HiSeq 2500	Blastocyst	Embryo	Embryo	True	Embryo	Embryo	Holstein	Female
SAMD00209824	Bos taurus	SINGLE	Unknown	Unknown	Unknown	ILLUMINA	Illumina HiSeq 2500	Blastocyst	Embryo	Embryo	True	Embryo	Embryo	Holstein	Female
SAMD00209825	Bos taurus	SINGLE	Unknown	Unknown	Unknown	ILLUMINA	Illumina HiSeq 2500	Blastocyst	Embryo	Embryo	True	Embryo	Embryo	Holstein	Female
SAMD00209826	Bos taurus	SINGLE	Unknown	Unknown	Unknown	ILLUMINA	Illumina HiSeq 2500	Blastocyst	Embryo	Embryo	True	Embryo	Embryo	Holstein	Female
SAMD00209827	Bos taurus	SINGLE	Unknown	Unknown	Unknown	ILLUMINA	Illumina HiSeq 2500	Blastocyst	Embryo	Embryo	True	Embryo	Embryo	Holstein	Female
SAMD00209828	Bos taurus	SINGLE	Unknown	Unknown	Unknown	ILLUMINA	Illumina HiSeq 2500	Early Elongation Staged Embryos	Embryo	Embryo	True	Embryo	Embryo	Holstein	Male
SAMD00209829	Bos taurus	SINGLE	Unknown	Unknown	Unknown	ILLUMINA	Illumina HiSeq 2500	Early Elongation Staged Embryos	Embryo	Embryo	True	Embryo	Embryo	Holstein	Female
SAMD00209830	Bos taurus	SINGLE	Unknown	Unknown	Unknown	ILLUMINA	Illumina HiSeq 2500	Early Elongation Staged Embryos	Embryo	Embryo	True	Embryo	Embryo	Holstein	Male
SAMD00209831	Bos taurus	SINGLE	Unknown	Unknown	Unknown	ILLUMINA	Illumina HiSeq 2500	Early Elongation Staged Embryos	Embryo	Embryo	True	Embryo	Embryo	Holstein	Female
SAMD00209832	Bos taurus	SINGLE	Unknown	Unknown	Unknown	ILLUMINA	Illumina HiSeq 2500	Early Elongation Staged Embryos	Embryo	Embryo	True	Embryo	Embryo	Holstein	Male
SAMD00232341	Bos taurus	PAIRED	Unknown	Unknown	Unknown	ILLUMINA	Illumina NovaSeq 6000	Enzootic Bovine Leukosis Sample A	Lymphoma	Other	True	Lymphoma	Other	Japanese Black	Male
SAMD00232342	Bos taurus	PAIRED	Unknown	Unknown	Unknown	ILLUMINA	Illumina NovaSeq 6000	Enzootic Bovine Leukosis Sample B	Lymphoma	Other	True	Lymphoma	Other	Holstein	Female
SAMD00239400	Bos taurus	SINGLE	Japanese Black	Unknown	Female	ILLUMINA	NextSeq 500	Granulosa	Granulosa	Female Reproductive System	True	Granulosa	Female Reproductive System	Japanese Black	Female
SAMD00239401	Bos taurus	SINGLE	Japanese Black	Unknown	Female	ILLUMINA	NextSeq 500	Granulosa	Granulosa	Female Reproductive System	True	Granulosa	Female Reproductive System	Japanese Black	Female
SAMD00239402	Bos taurus	SINGLE	Japanese Black	Unknown	Female	ILLUMINA	NextSeq 500	Granulosa	Granulosa	Female Reproductive System	True	Granulosa	Female Reproductive System	Japanese Black	Female
SAMD00239403	Bos taurus	SINGLE	Japanese Black	Unknown	Female	ILLUMINA	NextSeq 500	Granulosa	Granulosa	Female Reproductive System	True	Granulosa	Female Reproductive System	Japanese Black	Female
SAMD00239404	Bos taurus	SINGLE	Japanese Black	Unknown	Female	ILLUMINA	NextSeq 500	Granulosa	Granulosa	Female Reproductive System	True	Granulosa	Female Reproductive System	Japanese Black	Female
SAMD00239405	Bos taurus	SINGLE	Japanese Black	Unknown	Female	ILLUMINA	NextSeq 500	Granulosa	Granulosa	Female Reproductive System	True	Granulosa	Female Reproductive System	Japanese Black	Female
SAMD00259528	Bos taurus	SINGLE	Holstein	Unknown	Female	ILLUMINA	Illumina HiSeq 2500	Uterus	Uterus	Female Reproductive System	True	Uterus	Female Reproductive System	Holstein	Female
SAMD00259529	Bos taurus	SINGLE	Holstein	Unknown	Female	ILLUMINA	Illumina HiSeq 2500	Uterus	Uterus	Female Reproductive System	True	Uterus	Female Reproductive System	Holstein	Female
SAMD00259530	Bos taurus	SINGLE	Holstein	Unknown	Female	ILLUMINA	Illumina HiSeq 2500	Uterus	Uterus	Female Reproductive System	True	Uterus	Female Reproductive System	Holstein	Female
SAMD00259531	Bos taurus	SINGLE	Holstein	Unknown	Female	ILLUMINA	Illumina HiSeq 2500	Uterus	Uterus	Female Reproductive System	True	Uterus	Female Reproductive System	Holstein	Female
SAMD00259532	Bos taurus	SINGLE	Holstein	Unknown	Female	ILLUMINA	Illumina HiSeq 2500	Uterus	Uterus	Female Reproductive System	True	Uterus	Female Reproductive System	Holstein	Female
SAMD00259533	Bos taurus	SINGLE	Holstein	Unknown	Female	ILLUMINA	Illumina HiSeq 2500	Uterus	Uterus	Female Reproductive System	True	Uterus	Female Reproductive System	Holstein	Female
SAMD00282838	Bos taurus	SINGLE	Japanese Black	Unknown	Female	ILLUMINA	NextSeq 500	Granulosa	Granulosa	Female Reproductive System	True	Granulosa	Female Reproductive System	Japanese Black	Female
SAMD00282839	Bos taurus	SINGLE	Japanese Black	Unknown	Female	ILLUMINA	NextSeq 500	Granulosa	Granulosa	Female Reproductive System	True	Granulosa	Female Reproductive System	Japanese Black	Female
SAMD00282840	Bos taurus	SINGLE	Japanese Black	Unknown	Female	ILLUMINA	NextSeq 500	Granulosa	Granulosa	Female Reproductive System	True	Granulosa	Female Reproductive System	Japanese Black	Female
SAMD00282841	Bos taurus	SINGLE	Japanese Black	Unknown	Female	ILLUMINA	NextSeq 500	Granulosa	Granulosa	Female Reproductive System	True	Granulosa	Female Reproductive System	Japanese Black	Female
SAMD00282842	Bos taurus	SINGLE	Japanese Black	Unknown	Female	ILLUMINA	NextSeq 500	Granulosa	Granulosa	Female Reproductive System	True	Granulosa	Female Reproductive System	Japanese Black	Female
SAMD00282843	Bos taurus	SINGLE	Japanese Black	Unknown	Female	ILLUMINA	NextSeq 500	Granulosa	Granulosa	Female Reproductive System	True	Granulosa	Female Reproductive System	Japanese Black	Female
SAMD00287791	Bos taurus	SINGLE	Holstein x Japanese black	Unknown	Female	ILLUMINA	NextSeq 500	Epithelial Cells	Endometrium	Female Reproductive System	False	Cell Line	Cell Line	Holstein x Japanese black	Female
SAMD00287792	Bos taurus	SINGLE	Holstein x Japanese black	Unknown	Female	ILLUMINA	NextSeq 500	Epithelial Cells	Endometrium	Female Reproductive System	False	Cell Line	Cell Line	Holstein x Japanese black	Female
SAMD00287793	Bos taurus	SINGLE	Holstein x Japanese black	Unknown	Female	ILLUMINA	NextSeq 500	Epithelial Cells	Endometrium	Female Reproductive System	False	Cell Line	Cell Line	Holstein x Japanese black	Female
SAMD00287794	Bos taurus	SINGLE	Holstein x Japanese black	Unknown	Female	ILLUMINA	NextSeq 500	Epithelial Cells	Endometrium	Female Reproductive System	False	Cell Line	Cell Line	Holstein x Japanese black	Female
SAMD00287795	Bos taurus	SINGLE	Holstein x Japanese black	Unknown	Female	ILLUMINA	NextSeq 500	Epithelial Cells	Endometrium	Female Reproductive System	False	Cell Line	Cell Line	Holstein x Japanese black	Female
SAMD00287796	Bos taurus	SINGLE	Holstein x Japanese black	Unknown	Female	ILLUMINA	NextSeq 500	Epithelial Cells	Endometrium	Female Reproductive System	False	Cell Line	Cell Line	Holstein x Japanese black	Female
SAMD00287797	Bos taurus	SINGLE	Holstein x Japanese black	Unknown	Female	ILLUMINA	NextSeq 500	Epithelial Cells	Endometrium	Female Reproductive System	False	Cell Line	Cell Line	Holstein x Japanese black	Female
SAMD00287798	Bos taurus	SINGLE	Holstein x Japanese black	Unknown	Female	ILLUMINA	NextSeq 500	Epithelial Cells	Endometrium	Female Reproductive System	False	Cell Line	Cell Line	Holstein x Japanese black	Female
SAMD00287799	Bos taurus	SINGLE	Holstein x Japanese black	Unknown	Female	ILLUMINA	NextSeq 500	Epithelial Cells	Endometrium	Female Reproductive System	False	Cell Line	Cell Line	Holstein x Japanese black	Female
SAMD00287800	Bos taurus	SINGLE	Holstein x Japanese black	Unknown	Female	ILLUMINA	NextSeq 500	Epithelial Cells	Endometrium	Female Reproductive System	False	Cell Line	Cell Line	Holstein x Japanese black	Female
SAMD00287801	Bos taurus	SINGLE	Holstein x Japanese black	Unknown	Female	ILLUMINA	NextSeq 500	Epithelial Cells	Endometrium	Female Reproductive System	False	Cell Line	Cell Line	Holstein x Japanese black	Female
SAMD00287802	Bos taurus	SINGLE	Holstein x Japanese black	Unknown	Female	ILLUMINA	NextSeq 500	Epithelial Cells	Endometrium	Female Reproductive System	False	Cell Line	Cell Line	Holstein x Japanese black	Female
SAMD00389778	Bos taurus	SINGLE	Japanese Black	25-50 months	Female	ILLUMINA	NextSeq 500	Embryo	Embryo	Embryo	True	Embryo	Embryo	Japanese Black	Female
SAMD00389779	Bos taurus	SINGLE	Japanese Black	25-50 months	Female	ILLUMINA	NextSeq 500	Embryo	Embryo	Embryo	True	Embryo	Embryo	Japanese Black	Female
SAMD00389780	Bos taurus	SINGLE	Japanese Black	25-50 months	Female	ILLUMINA	NextSeq 500	Embryo	Embryo	Embryo	True	Embryo	Embryo	Japanese Black	Female
SAMD00389781	Bos taurus	SINGLE	Japanese Black	25-50 months	Female	ILLUMINA	NextSeq 500	Embryo	Embryo	Embryo	True	Embryo	Embryo	Japanese Black	Female
SAMD00389782	Bos taurus	SINGLE	Japanese Black	25-50 months	Female	ILLUMINA	NextSeq 500	Embryo	Embryo	Embryo	True	Embryo	Embryo	Japanese Black	Female
SAMD00389783	Bos taurus	SINGLE	Japanese Black	25-50 months	Female	ILLUMINA	NextSeq 500	Embryo	Embryo	Embryo	True	Embryo	Embryo	Japanese Black	Female
SAMD00453086	Bos taurus	PAIRED	Japanese Brown	Unknown	Female	ILLUMINA	HiSeq X Ten	Peripheral Blood	Blood	Immune System	True	Blood	Immune System	Japanese Brown	Female
SAMD00453087	Bos taurus	PAIRED	Japanese Brown	Unknown	Female	ILLUMINA	HiSeq X Ten	Peripheral Blood	Blood	Immune System	True	Blood	Immune System	Japanese Brown	Female
SAMD00453088	Bos taurus	PAIRED	Japanese Brown	Unknown	Female	ILLUMINA	HiSeq X Ten	Peripheral Blood	Blood	Immune System	True	Blood	Immune System	Japanese Brown	Female
SAMD00453089	Bos taurus	PAIRED	Japanese Brown	Unknown	Female	ILLUMINA	HiSeq X Ten	Peripheral Blood	Blood	Immune System	True	Blood	Immune System	Japanese Brown	Female
SAMD00453090	Bos taurus	PAIRED	Japanese Brown	Unknown	Female	ILLUMINA	HiSeq X Ten	Peripheral Blood	Blood	Immune System	True	Blood	Immune System	Japanese Brown	Female
SAMD00453091	Bos taurus	PAIRED	Japanese Brown	Unknown	Female	ILLUMINA	HiSeq X Ten	Peripheral Blood	Blood	Immune System	True	Blood	Immune System	Japanese Brown	Female
SAMD00453092	Bos taurus	PAIRED	Japanese Brown	Unknown	Female	ILLUMINA	HiSeq X Ten	Peripheral Blood	Blood	Immune System	Failed	Blood	Immune System	Japanese Brown	Female
SAMD00453093	Bos taurus	PAIRED	Japanese Brown	Unknown	Female	ILLUMINA	HiSeq X Ten	Peripheral Blood	Blood	Immune System	True	Blood	Immune System	Japanese Brown	Female
SAMD00453094	Bos taurus	PAIRED	Japanese Brown	Unknown	Female	ILLUMINA	HiSeq X Ten	Peripheral Blood	Blood	Immune System	True	Blood	Immune System	Japanese Brown	Female
SAMD00532378	Bos taurus	PAIRED	Holstein	Unknown	Unknown	ILLUMINA	Illumina NovaSeq 6000	Lymph Node	Lymph Node	Immune System	True	Lymph Node	Immune System	Holstein	Female
SAMD00532379	Bos taurus	PAIRED	Holstein	Unknown	Unknown	ILLUMINA	Illumina NovaSeq 6000	Lymph Node	Lymph Node	Immune System	True	Lymph Node	Immune System	Holstein	Male
SAMD00549717	Bos taurus	PAIRED	Japanese Black	Unknown	Female	ILLUMINA	Illumina HiSeq 2500	Endometrium Stromal Cell	Endometrium	Female Reproductive System	False	Cell Line	Cell Line	Japanese Black	Female
SAMD00549718	Bos taurus	PAIRED	Unknown	Unknown	Female	ILLUMINA	Illumina HiSeq 2500	Endometrium Stromal Cell	Endometrium	Female Reproductive System	False	Cell Line	Cell Line	Japanese Black	Female
SAMD00549719	Bos taurus	PAIRED	Unknown	Unknown	Female	ILLUMINA	Illumina HiSeq 2500	Endometrium Stromal Cell	Endometrium	Female Reproductive System	False	Cell Line	Cell Line	Japanese Black	Female
SAMD00549720	Bos taurus	PAIRED	Unknown	Unknown	Female	ILLUMINA	Illumina HiSeq 2500	Endometrium Stromal Cell	Endometrium	Female Reproductive System	False	Cell Line	Cell Line	Japanese Black	Female
SAMD00549721	Bos taurus	PAIRED	Unknown	Unknown	Female	ILLUMINA	Illumina HiSeq 2500	Endometrium Stromal Cell	Endometrium	Female Reproductive System	False	Cell Line	Cell Line	Japanese Black	Female
SAMD00549722	Bos taurus	PAIRED	Unknown	Unknown	Female	ILLUMINA	Illumina HiSeq 2500	Endometrium Stromal Cell	Endometrium	Female Reproductive System	False	Cell Line	Cell Line	Japanese Black	Female
SAMEA103988700	Bos taurus	PAIRED	Unknown	1532 days	Unknown	ILLUMINA	Illumina NovaSeq 6000	Cerebellum	CNS	Nervous System	True	CNS	Nervous System	Holstein	Female
SAMEA103989324	Bos taurus	PAIRED	Unknown	539 days	Unknown	ILLUMINA	Illumina NovaSeq 6000	Lung Parenchyma	Lung	Respiratory System	True	Lung	Respiratory System	Holstein	Male
SAMEA103989656	Bos taurus	PAIRED	Unknown	1250 days	Unknown	ILLUMINA	Illumina HiSeq 3000	Liver Parenchyma	Liver	Liver	True	Liver	Liver	Holstein	Female
SAMEA103989694	Bos taurus	PAIRED	Unknown	1532 days	Unknown	ILLUMINA	Illumina HiSeq 3000	Liver Parenchyma	Liver	Liver	True	Liver	Liver	Holstein	Female
SAMEA103989800	Bos taurus	PAIRED	Unknown	539 days	Unknown	ILLUMINA	Illumina HiSeq 3000	Liver Parenchyma	Liver	Liver	True	Liver	Liver	Holstein	Male
SAMEA103989857	Bos taurus	PAIRED	Unknown	539 days	Male	ILLUMINA	Illumina NovaSeq 6000	Testis	Testis	Male Reproductive System	True	Testis	Male Reproductive System	Holstein	Male
SAMEA103990241	Bos taurus	PAIRED	Unknown	1532 days	Unknown	ILLUMINA	Illumina NovaSeq 6000	Lung Parenchyma	Lung	Respiratory System	True	Lung	Respiratory System	Holstein	Female
SAMEA103990279	Bos taurus	PAIRED	Unknown	539 days	Unknown	ILLUMINA	Illumina NovaSeq 6000	Longissimus Lumborum Muscle	Muscle	Muscular System	True	Muscle	Muscular System	Holstein	Male
SAMEA103990470	Bos taurus	PAIRED	Unknown	602 days	Unknown	ILLUMINA	Illumina NovaSeq 6000	Lung Parenchyma	Lung	Respiratory System	True	Lung	Respiratory System	Holstein	Male
SAMEA103991310	Bos taurus	PAIRED	Unknown	1532 days	Unknown	ILLUMINA	Illumina NovaSeq 6000	Longissimus Lumborum Muscle	Muscle	Muscular System	True	Muscle	Muscular System	Holstein	Female
SAMEA103991636	Bos taurus	PAIRED	Unknown	602 days	Unknown	ILLUMINA	Illumina HiSeq 3000	Liver Parenchyma	Liver	Liver	True	Liver	Liver	Holstein	Male
SAMEA103991643	Bos taurus	PAIRED	Unknown	602 days	Unknown	ILLUMINA	Illumina NovaSeq 6000	Cerebellum	CNS	Nervous System	True	CNS	Nervous System	Holstein	Male
SAMEA103991676	Bos taurus	PAIRED	Unknown	1250 days	Unknown	ILLUMINA	Illumina NovaSeq 6000	Cerebellum	CNS	Nervous System	True	CNS	Nervous System	Holstein	Female
SAMEA103991688	Bos taurus	PAIRED	Unknown	602 days	Male	ILLUMINA	Illumina NovaSeq 6000	Testis	Testis	Male Reproductive System	True	Testis	Male Reproductive System	Holstein	Male
SAMEA103992112	Bos taurus	PAIRED	Unknown	602 days	Unknown	ILLUMINA	Illumina NovaSeq 6000	Longissimus Lumborum Muscle	Muscle	Muscular System	True	Muscle	Muscular System	Holstein	Male
SAMEA104129619	Bos taurus	SINGLE	Unknown	Unknown	Unknown	ION_TORRENT	Ion Torrent Proton	Primary Fibroblasts	Fibroblast	Integumentary System	False	Cell Line	Cell Line	Holstein	Male
SAMEA104129620	Bos taurus	SINGLE	Unknown	Unknown	Unknown	ION_TORRENT	Ion Torrent Proton	Primary Fibroblasts	Fibroblast	Integumentary System	False	Cell Line	Cell Line	Holstein	Male
SAMEA104129621	Bos taurus	SINGLE	Unknown	Unknown	Unknown	ION_TORRENT	Ion Torrent Proton	Primary Fibroblasts	Fibroblast	Integumentary System	False	Cell Line	Cell Line	Holstein	Male
SAMEA104129622	Bos taurus	SINGLE	Unknown	Unknown	Unknown	ION_TORRENT	Ion Torrent Proton	Primary Fibroblasts	Fibroblast	Integumentary System	False	Cell Line	Cell Line	Holstein	Male
SAMEA104129623	Bos taurus	SINGLE	Unknown	Unknown	Unknown	ION_TORRENT	Ion Torrent Proton	Primary Fibroblasts	Fibroblast	Integumentary System	False	Cell Line	Cell Line	Limousin	Female
SAMEA104129624	Bos taurus	SINGLE	Unknown	Unknown	Unknown	ION_TORRENT	Ion Torrent Proton	Primary Fibroblasts	Fibroblast	Integumentary System	False	Cell Line	Cell Line	Limousin	Male
SAMEA104129625	Bos taurus	SINGLE	Unknown	Unknown	Unknown	ION_TORRENT	Ion Torrent Proton	Primary Fibroblasts	Fibroblast	Integumentary System	False	Cell Line	Cell Line	Holstein	Male
SAMEA104129626	Bos taurus	SINGLE	Unknown	Unknown	Unknown	ION_TORRENT	Ion Torrent Proton	Primary Fibroblasts	Fibroblast	Integumentary System	False	Cell Line	Cell Line	Holstein	Female
SAMEA104136970	Bos taurus	PAIRED	Holstein x Jersey	3 years	Female	ILLUMINA	Illumina HiSeq 2500	Neutrophil	Neutrophil	Immune System	True	Neutrophil	Immune System	Holstein x Jersey	Female
SAMEA104136971	Bos taurus	PAIRED	Holstein x Jersey	3 years	Female	ILLUMINA	Illumina HiSeq 2500	Neutrophil	Neutrophil	Immune System	True	Neutrophil	Immune System	Holstein x Jersey	Female
SAMEA104136972	Bos taurus	PAIRED	Holstein x Jersey	3 years	Female	ILLUMINA	Illumina HiSeq 2500	Neutrophil	Neutrophil	Immune System	Low_quality	Neutrophil	Immune System	Holstein x Jersey	Female
SAMEA104136973	Bos taurus	PAIRED	Holstein	3 years	Female	ILLUMINA	Illumina HiSeq 2500	Neutrophil	Neutrophil	Immune System	True	Neutrophil	Immune System	Holstein	Female
SAMEA104136974	Bos taurus	PAIRED	Holstein	3 years	Female	ILLUMINA	Illumina HiSeq 2500	Neutrophil	Neutrophil	Immune System	Failed	Neutrophil	Immune System	Holstein	Female
SAMEA104136975	Bos taurus	PAIRED	Holstein	3 years	Female	ILLUMINA	Illumina HiSeq 2500	Neutrophil	Neutrophil	Immune System	True	Neutrophil	Immune System	Holstein	Female
SAMEA104136976	Bos taurus	PAIRED	Holstein x Jersey	5 years	Female	ILLUMINA	Illumina HiSeq 2500	Neutrophil	Neutrophil	Immune System	True	Neutrophil	Immune System	Holstein x Jersey	Female
SAMEA104136977	Bos taurus	PAIRED	Holstein x Jersey	5 years	Female	ILLUMINA	Illumina HiSeq 2500	Neutrophil	Neutrophil	Immune System	True	Neutrophil	Immune System	Holstein x Jersey	Female
SAMEA104136978	Bos taurus	PAIRED	Holstein x Jersey	5 years	Female	ILLUMINA	Illumina HiSeq 2500	Neutrophil	Neutrophil	Immune System	True	Neutrophil	Immune System	Holstein x Jersey	Female
SAMEA104136979	Bos taurus	PAIRED	Holstein	4 years	Female	ILLUMINA	Illumina HiSeq 2500	Neutrophil	Neutrophil	Immune System	True	Neutrophil	Immune System	Holstein	Female
SAMEA104136980	Bos taurus	PAIRED	Holstein	4 years	Female	ILLUMINA	Illumina HiSeq 2500	Neutrophil	Neutrophil	Immune System	True	Neutrophil	Immune System	Holstein	Female
SAMEA104136981	Bos taurus	PAIRED	Holstein	4 years	Female	ILLUMINA	Illumina HiSeq 2500	Neutrophil	Neutrophil	Immune System	True	Neutrophil	Immune System	Holstein	Female
SAMEA104136982	Bos taurus	PAIRED	Holstein x Jersey	4 years	Female	ILLUMINA	Illumina HiSeq 2500	Neutrophil	Neutrophil	Immune System	True	Neutrophil	Immune System	Holstein x Jersey	Female
SAMEA104136983	Bos taurus	PAIRED	Holstein x Jersey	4 years	Female	ILLUMINA	Illumina HiSeq 2500	Neutrophil	Neutrophil	Immune System	True	Neutrophil	Immune System	Holstein x Jersey	Female
SAMEA104136984	Bos taurus	PAIRED	Holstein x Jersey	4 years	Female	ILLUMINA	Illumina HiSeq 2500	Neutrophil	Neutrophil	Immune System	True	Neutrophil	Immune System	Holstein x Jersey	Female
SAMEA104136985	Bos taurus	PAIRED	Holstein	6 years	Female	ILLUMINA	Illumina HiSeq 2500	Neutrophil	Neutrophil	Immune System	True	Neutrophil	Immune System	Holstein	Female
SAMEA104136986	Bos taurus	PAIRED	Holstein	6 years	Female	ILLUMINA	Illumina HiSeq 2500	Neutrophil	Neutrophil	Immune System	True	Neutrophil	Immune System	Holstein	Female
SAMEA104136987	Bos taurus	PAIRED	Holstein	6 years	Female	ILLUMINA	Illumina HiSeq 2500	Neutrophil	Neutrophil	Immune System	True	Neutrophil	Immune System	Holstein	Female
SAMEA104136988	Bos taurus	PAIRED	Holstein x Jersey	6 years	Female	ILLUMINA	Illumina HiSeq 2500	Neutrophil	Neutrophil	Immune System	True	Neutrophil	Immune System	Holstein x Jersey	Female
SAMEA104136989	Bos taurus	PAIRED	Holstein x Jersey	6 years	Female	ILLUMINA	Illumina HiSeq 2500	Neutrophil	Neutrophil	Immune System	True	Neutrophil	Immune System	Holstein x Jersey	Female
SAMEA104136990	Bos taurus	PAIRED	Holstein x Jersey	6 years	Female	ILLUMINA	Illumina HiSeq 2500	Neutrophil	Neutrophil	Immune System	True	Neutrophil	Immune System	Holstein x Jersey	Female
SAMEA104136991	Bos taurus	PAIRED	Holstein x Jersey	5 years	Female	ILLUMINA	Illumina HiSeq 2500	Neutrophil	Neutrophil	Immune System	True	Neutrophil	Immune System	Holstein x Jersey	Female
SAMEA104136992	Bos taurus	PAIRED	Holstein x Jersey	5 years	Female	ILLUMINA	Illumina HiSeq 2500	Neutrophil	Neutrophil	Immune System	True	Neutrophil	Immune System	Holstein x Jersey	Female
SAMEA104136993	Bos taurus	PAIRED	Holstein x Jersey	5 years	Female	ILLUMINA	Illumina HiSeq 2500	Neutrophil	Neutrophil	Immune System	True	Neutrophil	Immune System	Holstein x Jersey	Female
SAMEA104136994	Bos taurus	PAIRED	Holstein	5 years	Female	ILLUMINA	Illumina HiSeq 2500	Neutrophil	Neutrophil	Immune System	True	Neutrophil	Immune System	Holstein	Female
SAMEA104136995	Bos taurus	PAIRED	Holstein	5 years	Female	ILLUMINA	Illumina HiSeq 2500	Neutrophil	Neutrophil	Immune System	True	Neutrophil	Immune System	Holstein	Female
SAMEA104136996	Bos taurus	PAIRED	Holstein	5 years	Female	ILLUMINA	Illumina HiSeq 2500	Neutrophil	Neutrophil	Immune System	True	Neutrophil	Immune System	Holstein	Female
SAMEA104136997	Bos taurus	PAIRED	Holstein	4 years	Female	ILLUMINA	Illumina HiSeq 2500	Neutrophil	Neutrophil	Immune System	True	Neutrophil	Immune System	Holstein	Female
SAMEA104136998	Bos taurus	PAIRED	Holstein	4 years	Female	ILLUMINA	Illumina HiSeq 2500	Neutrophil	Neutrophil	Immune System	True	Neutrophil	Immune System	Holstein	Female
SAMEA104136999	Bos taurus	PAIRED	Holstein	4 years	Female	ILLUMINA	Illumina HiSeq 2500	Neutrophil	Neutrophil	Immune System	True	Neutrophil	Immune System	Holstein	Female
SAMEA104223986	Bos taurus	PAIRED	Charolais x Limousin	Unknown	Unknown	ILLUMINA	Illumina HiSeq 2500	Blood	Blood	Immune System	Low_quality	Blood	Immune System	Charolais x Limousin	Unknown
SAMEA104223987	Bos taurus	PAIRED	Charolais x Limousin	Unknown	Unknown	ILLUMINA	Illumina HiSeq 2500	Blood	Blood	Immune System	Low_quality	Blood	Immune System	Charolais x Limousin	Unknown
SAMEA104223988	Bos taurus	PAIRED	Charolais x Limousin	Unknown	Unknown	ILLUMINA	Illumina HiSeq 2500	Blood	Blood	Immune System	Low_quality	Blood	Immune System	Charolais x Limousin	Unknown
SAMEA104223989	Bos taurus	PAIRED	Charolais x Limousin	Unknown	Unknown	ILLUMINA	Illumina HiSeq 2500	Blood	Blood	Immune System	Low_quality	Blood	Immune System	Charolais x Limousin	Unknown
SAMEA104223990	Bos taurus	PAIRED	Charolais x Limousin	Unknown	Unknown	ILLUMINA	Illumina HiSeq 2500	Blood	Blood	Immune System	Low_quality	Blood	Immune System	Charolais x Limousin	Unknown
SAMEA104223991	Bos taurus	PAIRED	Charolais x Limousin	Unknown	Unknown	ILLUMINA	Illumina HiSeq 2500	Blood	Blood	Immune System	Low_quality	Blood	Immune System	Charolais x Limousin	Unknown
SAMEA104223992	Bos taurus	PAIRED	Charolais x Limousin	Unknown	Unknown	ILLUMINA	Illumina HiSeq 2500	Blood	Blood	Immune System	Low_quality	Blood	Immune System	Charolais x Limousin	Unknown
SAMEA104223993	Bos taurus	PAIRED	Charolais x Limousin	Unknown	Unknown	ILLUMINA	Illumina HiSeq 2500	Blood	Blood	Immune System	Low_quality	Blood	Immune System	Charolais x Limousin	Unknown
SAMEA104223994	Bos taurus	PAIRED	Charolais x Limousin	Unknown	Unknown	ILLUMINA	Illumina HiSeq 2500	Blood	Blood	Immune System	Low_quality	Blood	Immune System	Charolais x Limousin	Unknown
SAMEA104223995	Bos taurus	PAIRED	Charolais x Limousin	Unknown	Unknown	ILLUMINA	Illumina HiSeq 2500	Blood	Blood	Immune System	Low_quality	Blood	Immune System	Charolais x Limousin	Unknown
SAMEA104223996	Bos taurus	PAIRED	Charolais x Limousin	Unknown	Unknown	ILLUMINA	Illumina HiSeq 2500	Blood	Blood	Immune System	Low_quality	Blood	Immune System	Charolais x Limousin	Unknown
SAMEA104223997	Bos taurus	PAIRED	Charolais x Limousin	Unknown	Unknown	ILLUMINA	Illumina HiSeq 2500	Blood	Blood	Immune System	Low_quality	Blood	Immune System	Charolais x Limousin	Unknown
SAMEA104223998	Bos taurus	PAIRED	Charolais x Limousin	Unknown	Unknown	ILLUMINA	Illumina HiSeq 2500	Blood	Blood	Immune System	Low_quality	Blood	Immune System	Charolais x Limousin	Unknown
SAMEA104223999	Bos taurus	PAIRED	Charolais x Limousin	Unknown	Unknown	ILLUMINA	Illumina HiSeq 2500	Blood	Blood	Immune System	Low_quality	Blood	Immune System	Charolais x Limousin	Unknown
SAMEA104224000	Bos taurus	PAIRED	Charolais x Limousin	Unknown	Unknown	ILLUMINA	Illumina HiSeq 2500	Blood	Blood	Immune System	Low_quality	Blood	Immune System	Charolais x Limousin	Unknown
SAMEA104224001	Bos taurus	PAIRED	Charolais x Limousin	Unknown	Unknown	ILLUMINA	Illumina HiSeq 2500	Blood	Blood	Immune System	Low_quality	Blood	Immune System	Charolais x Limousin	Unknown
SAMEA104224002	Bos taurus	PAIRED	Charolais x Limousin	Unknown	Unknown	ILLUMINA	Illumina HiSeq 2500	Blood	Blood	Immune System	Low_quality	Blood	Immune System	Charolais x Limousin	Unknown
SAMEA104224003	Bos taurus	PAIRED	Charolais x Limousin	Unknown	Unknown	ILLUMINA	Illumina HiSeq 2500	Blood	Blood	Immune System	Low_quality	Blood	Immune System	Charolais x Limousin	Unknown
SAMEA104224004	Bos taurus	PAIRED	Charolais x Limousin	Unknown	Unknown	ILLUMINA	Illumina HiSeq 2500	Blood	Blood	Immune System	Low_quality	Blood	Immune System	Charolais x Limousin	Unknown
SAMEA104224005	Bos taurus	PAIRED	Charolais x Limousin	Unknown	Unknown	ILLUMINA	Illumina HiSeq 2500	Blood	Blood	Immune System	Low_quality	Blood	Immune System	Charolais x Limousin	Unknown
SAMEA104224006	Bos taurus	PAIRED	Charolais x Limousin	Unknown	Unknown	ILLUMINA	Illumina HiSeq 2500	Blood	Blood	Immune System	Low_quality	Blood	Immune System	Charolais x Limousin	Unknown
SAMEA104224007	Bos taurus	PAIRED	Charolais x Limousin	Unknown	Unknown	ILLUMINA	Illumina HiSeq 2500	Blood	Blood	Immune System	Low_quality	Blood	Immune System	Charolais x Limousin	Unknown
SAMEA104224008	Bos taurus	PAIRED	Charolais x Limousin	Unknown	Unknown	ILLUMINA	Illumina HiSeq 2500	Blood	Blood	Immune System	Low_quality	Blood	Immune System	Charolais x Limousin	Unknown
SAMEA104224009	Bos taurus	PAIRED	Charolais x Limousin	Unknown	Unknown	ILLUMINA	Illumina HiSeq 2500	Blood	Blood	Immune System	Low_quality	Blood	Immune System	Charolais x Limousin	Unknown
SAMEA104224010	Bos taurus	PAIRED	Charolais x Limousin	Unknown	Unknown	ILLUMINA	Illumina HiSeq 2500	Blood	Blood	Immune System	Low_quality	Blood	Immune System	Charolais x Limousin	Unknown
SAMEA104224011	Bos taurus	PAIRED	Charolais x Limousin	Unknown	Unknown	ILLUMINA	Illumina HiSeq 2500	Blood	Blood	Immune System	Low_quality	Blood	Immune System	Charolais x Limousin	Unknown
SAMEA104224012	Bos taurus	PAIRED	Charolais x Limousin	Unknown	Unknown	ILLUMINA	Illumina HiSeq 2500	Blood	Blood	Immune System	Low_quality	Blood	Immune System	Charolais x Limousin	Unknown
SAMEA104224013	Bos taurus	PAIRED	Charolais x Limousin	Unknown	Unknown	ILLUMINA	Illumina HiSeq 2500	Blood	Blood	Immune System	Low_quality	Blood	Immune System	Charolais x Limousin	Unknown
SAMEA104224014	Bos taurus	PAIRED	Charolais x Limousin	Unknown	Unknown	ILLUMINA	Illumina HiSeq 2500	Blood	Blood	Immune System	Low_quality	Blood	Immune System	Charolais x Limousin	Unknown
SAMEA104224015	Bos taurus	PAIRED	Charolais x Limousin	Unknown	Unknown	ILLUMINA	Illumina HiSeq 2500	Blood	Blood	Immune System	Low_quality	Blood	Immune System	Charolais x Limousin	Unknown
SAMEA104224016	Bos taurus	PAIRED	Charolais x Limousin	Unknown	Unknown	ILLUMINA	Illumina HiSeq 2500	Blood	Blood	Immune System	Low_quality	Blood	Immune System	Charolais x Limousin	Unknown
SAMEA104224017	Bos taurus	PAIRED	Charolais x Limousin	Unknown	Unknown	ILLUMINA	Illumina HiSeq 2500	Blood	Blood	Immune System	Low_quality	Blood	Immune System	Charolais x Limousin	Unknown
SAMEA104224018	Bos taurus	PAIRED	Charolais x Limousin	Unknown	Unknown	ILLUMINA	Illumina HiSeq 2500	Blood	Blood	Immune System	Low_quality	Blood	Immune System	Charolais x Limousin	Unknown
SAMEA104224019	Bos taurus	PAIRED	Charolais x Limousin	Unknown	Unknown	ILLUMINA	Illumina HiSeq 2500	Blood	Blood	Immune System	Low_quality	Blood	Immune System	Charolais x Limousin	Unknown
SAMEA104224020	Bos taurus	PAIRED	Charolais x Limousin	Unknown	Unknown	ILLUMINA	Illumina HiSeq 2500	Blood	Blood	Immune System	Low_quality	Blood	Immune System	Charolais x Limousin	Unknown
SAMEA104224021	Bos taurus	PAIRED	Charolais x Limousin	Unknown	Unknown	ILLUMINA	Illumina HiSeq 2500	Blood	Blood	Immune System	Low_quality	Blood	Immune System	Charolais x Limousin	Unknown
SAMEA104224022	Bos taurus	PAIRED	Charolais x Limousin	Unknown	Unknown	ILLUMINA	Illumina HiSeq 2500	Blood	Blood	Immune System	Low_quality	Blood	Immune System	Charolais x Limousin	Unknown
SAMEA104224023	Bos taurus	PAIRED	Charolais x Limousin	Unknown	Unknown	ILLUMINA	Illumina HiSeq 2500	Blood	Blood	Immune System	Low_quality	Blood	Immune System	Charolais x Limousin	Unknown
SAMEA104224024	Bos taurus	PAIRED	Charolais x Limousin	Unknown	Unknown	ILLUMINA	Illumina HiSeq 2500	Blood	Blood	Immune System	Low_quality	Blood	Immune System	Charolais x Limousin	Unknown
SAMEA104224025	Bos taurus	PAIRED	Charolais x Limousin	Unknown	Unknown	ILLUMINA	Illumina HiSeq 2500	Blood	Blood	Immune System	Low_quality	Blood	Immune System	Charolais x Limousin	Unknown
SAMEA104224026	Bos taurus	PAIRED	Charolais x Limousin	Unknown	Unknown	ILLUMINA	Illumina HiSeq 2500	Blood	Blood	Immune System	Low_quality	Blood	Immune System	Charolais x Limousin	Unknown
SAMEA104224027	Bos taurus	PAIRED	Charolais x Limousin	Unknown	Unknown	ILLUMINA	Illumina HiSeq 2500	Blood	Blood	Immune System	Low_quality	Blood	Immune System	Charolais x Limousin	Unknown
SAMEA104224028	Bos taurus	PAIRED	Charolais x Limousin	Unknown	Unknown	ILLUMINA	Illumina HiSeq 2500	Blood	Blood	Immune System	Low_quality	Blood	Immune System	Charolais x Limousin	Unknown
SAMEA104224029	Bos taurus	PAIRED	Charolais x Limousin	Unknown	Unknown	ILLUMINA	Illumina HiSeq 2500	Blood	Blood	Immune System	Low_quality	Blood	Immune System	Charolais x Limousin	Unknown
SAMEA104224030	Bos taurus	PAIRED	Charolais x Limousin	Unknown	Unknown	ILLUMINA	Illumina HiSeq 2500	Blood	Blood	Immune System	Low_quality	Blood	Immune System	Charolais x Limousin	Unknown
SAMEA104224031	Bos taurus	PAIRED	Charolais x Limousin	Unknown	Unknown	ILLUMINA	Illumina HiSeq 2500	Blood	Blood	Immune System	Low_quality	Blood	Immune System	Charolais x Limousin	Unknown
SAMEA104224032	Bos taurus	PAIRED	Charolais x Limousin	Unknown	Unknown	ILLUMINA	Illumina HiSeq 2500	Blood	Blood	Immune System	Low_quality	Blood	Immune System	Charolais x Limousin	Unknown
SAMEA104224033	Bos taurus	PAIRED	Charolais x Limousin	Unknown	Unknown	ILLUMINA	Illumina HiSeq 2500	Blood	Blood	Immune System	Low_quality	Blood	Immune System	Charolais x Limousin	Unknown
SAMEA104224034	Bos taurus	PAIRED	Charolais x Limousin	Unknown	Unknown	ILLUMINA	Illumina HiSeq 2500	Blood	Blood	Immune System	Low_quality	Blood	Immune System	Charolais x Limousin	Unknown
SAMEA104224035	Bos taurus	PAIRED	Charolais x Limousin	Unknown	Unknown	ILLUMINA	Illumina HiSeq 2500	Blood	Blood	Immune System	Low_quality	Blood	Immune System	Charolais x Limousin	Unknown
SAMEA104224036	Bos taurus	PAIRED	Charolais x Limousin	Unknown	Unknown	ILLUMINA	Illumina HiSeq 2500	Blood	Blood	Immune System	Low_quality	Blood	Immune System	Charolais x Limousin	Unknown
SAMEA104224037	Bos taurus	PAIRED	Charolais x Limousin	Unknown	Unknown	ILLUMINA	Illumina HiSeq 2500	Blood	Blood	Immune System	Low_quality	Blood	Immune System	Charolais x Limousin	Unknown
SAMEA104224038	Bos taurus	PAIRED	Charolais x Limousin	Unknown	Unknown	ILLUMINA	Illumina HiSeq 2500	Blood	Blood	Immune System	Low_quality	Blood	Immune System	Charolais x Limousin	Unknown
SAMEA104224039	Bos taurus	PAIRED	Charolais x Limousin	Unknown	Unknown	ILLUMINA	Illumina HiSeq 2500	Blood	Blood	Immune System	Low_quality	Blood	Immune System	Charolais x Limousin	Unknown
SAMEA104224040	Bos taurus	PAIRED	Charolais x Limousin	Unknown	Unknown	ILLUMINA	Illumina HiSeq 2500	Blood	Blood	Immune System	Low_quality	Blood	Immune System	Charolais x Limousin	Unknown
SAMEA104224041	Bos taurus	PAIRED	Charolais x Limousin	Unknown	Unknown	ILLUMINA	Illumina HiSeq 2500	Blood	Blood	Immune System	Low_quality	Blood	Immune System	Charolais x Limousin	Unknown
SAMEA104224042	Bos taurus	PAIRED	Charolais x Limousin	Unknown	Unknown	ILLUMINA	Illumina HiSeq 2500	Blood	Blood	Immune System	Low_quality	Blood	Immune System	Charolais x Limousin	Unknown
SAMEA104224043	Bos taurus	PAIRED	Charolais x Limousin	Unknown	Unknown	ILLUMINA	Illumina HiSeq 2500	Blood	Blood	Immune System	Low_quality	Blood	Immune System	Charolais x Limousin	Unknown
SAMEA104224044	Bos taurus	PAIRED	Charolais x Limousin	Unknown	Unknown	ILLUMINA	Illumina HiSeq 2500	Blood	Blood	Immune System	Low_quality	Blood	Immune System	Charolais x Limousin	Unknown
SAMEA104224045	Bos taurus	PAIRED	Charolais x Limousin	Unknown	Unknown	ILLUMINA	Illumina HiSeq 2500	Blood	Blood	Immune System	Low_quality	Blood	Immune System	Charolais x Limousin	Unknown
SAMEA104224046	Bos taurus	PAIRED	Charolais x Limousin	Unknown	Unknown	ILLUMINA	Illumina HiSeq 2500	Blood	Blood	Immune System	Low_quality	Blood	Immune System	Charolais x Limousin	Unknown
SAMEA104224047	Bos taurus	PAIRED	Charolais x Limousin	Unknown	Unknown	ILLUMINA	Illumina HiSeq 2500	Blood	Blood	Immune System	Low_quality	Blood	Immune System	Charolais x Limousin	Unknown
SAMEA104224048	Bos taurus	PAIRED	Charolais x Limousin	Unknown	Unknown	ILLUMINA	Illumina HiSeq 2500	Blood	Blood	Immune System	Low_quality	Blood	Immune System	Charolais x Limousin	Unknown
SAMEA104224049	Bos taurus	PAIRED	Charolais x Limousin	Unknown	Unknown	ILLUMINA	Illumina HiSeq 2500	Blood	Blood	Immune System	Low_quality	Blood	Immune System	Charolais x Limousin	Unknown
SAMEA104468257	Bos taurus	PAIRED	Holstein	Unknown	Male	ILLUMINA	Illumina HiSeq 2500	Jejunum Mucosa	Jejunum	Digestive System	True	Jejunum	Digestive System	Holstein	Male
SAMEA104468263	Bos taurus	PAIRED	Holstein	Unknown	Male	ILLUMINA	Illumina HiSeq 2500	Jejunum Mucosa	Jejunum	Digestive System	True	Jejunum	Digestive System	Holstein	Male
SAMEA104468264	Bos taurus	PAIRED	Holstein	Unknown	Male	ILLUMINA	Illumina HiSeq 2500	Jejunum Mucosa	Jejunum	Digestive System	True	Jejunum	Digestive System	Holstein	Male
SAMEA104468265	Bos taurus	PAIRED	Holstein	Unknown	Male	ILLUMINA	Illumina HiSeq 2500	Jejunum Mucosa	Jejunum	Digestive System	True	Jejunum	Digestive System	Holstein	Male
SAMEA104468266	Bos taurus	PAIRED	Holstein	Unknown	Male	ILLUMINA	Illumina HiSeq 2500	Jejunum Mucosa	Jejunum	Digestive System	True	Jejunum	Digestive System	Holstein	Male
SAMEA104468267	Bos taurus	PAIRED	Holstein	Unknown	Male	ILLUMINA	Illumina HiSeq 2500	Jejunum Mucosa	Jejunum	Digestive System	True	Jejunum	Digestive System	Holstein	Male
SAMEA104468268	Bos taurus	PAIRED	Holstein	Unknown	Male	ILLUMINA	Illumina HiSeq 2500	Jejunum Mucosa	Jejunum	Digestive System	True	Jejunum	Digestive System	Holstein	Male
SAMEA104468269	Bos taurus	PAIRED	Holstein	Unknown	Male	ILLUMINA	Illumina HiSeq 2500	Jejunum Mucosa	Jejunum	Digestive System	True	Jejunum	Digestive System	Holstein	Male
SAMEA104468270	Bos taurus	PAIRED	Holstein	Unknown	Male	ILLUMINA	Illumina HiSeq 2500	Jejunum Mucosa	Jejunum	Digestive System	True	Jejunum	Digestive System	Holstein	Male
SAMEA104468271	Bos taurus	PAIRED	Holstein	Unknown	Male	ILLUMINA	Illumina HiSeq 2500	Jejunum Mucosa	Jejunum	Digestive System	True	Jejunum	Digestive System	Holstein	Male
SAMEA104468272	Bos taurus	PAIRED	Holstein	Unknown	Male	ILLUMINA	Illumina HiSeq 2500	Jejunum Mucosa	Jejunum	Digestive System	True	Jejunum	Digestive System	Holstein	Male
SAMEA104468273	Bos taurus	PAIRED	Holstein	Unknown	Male	ILLUMINA	Illumina HiSeq 2500	Jejunum Mucosa	Jejunum	Digestive System	True	Jejunum	Digestive System	Holstein	Male
SAMEA104495751	Bos indicus	SINGLE	Unknown	2 years	Male	ILLUMINA	Illumina HiSeq 2000	Testis	Testis	Male Reproductive System	Low_quality	Testis	Male Reproductive System	Unknown	Male
SAMEA104495752	Bos indicus	SINGLE	Unknown	2 years	Male	ILLUMINA	Illumina HiSeq 2000	Epididymis	Epididymis	Male Reproductive System	Low_quality	Epididymis	Male Reproductive System	Unknown	Male
SAMEA104495753	Bos indicus	SINGLE	Unknown	7 weeks	Male	ILLUMINA	Illumina HiSeq 2000	Testis	Testis	Male Reproductive System	Low_quality	Testis	Male Reproductive System	Unknown	Male
SAMEA104495754	Bos indicus	PAIRED	Unknown	7 weeks	Male	ILLUMINA	Illumina HiSeq 2000	Testis	Testis	Male Reproductive System	True	Testis	Male Reproductive System	Chinese yellow cattle	Male
SAMEA104495756	Bos indicus	SINGLE	Unknown	2 years	Male	ILLUMINA	Illumina HiSeq 2000	Epididymis	Epididymis	Male Reproductive System	Low_quality	Epididymis	Male Reproductive System	Unknown	Male
SAMEA104495757	Bos indicus	PAIRED	Unknown	2 years	Unknown	ILLUMINA	Illumina HiSeq 2000	Liver	Liver	Liver	True	Liver	Liver	Brahman	Female
SAMEA104495759	Bos indicus	PAIRED	Unknown	7 weeks	Male	ILLUMINA	Illumina HiSeq 2000	Testis	Testis	Male Reproductive System	True	Testis	Male Reproductive System	Brangus	Male
SAMEA104495760	Bos indicus	PAIRED	Unknown	2 years	Male	ILLUMINA	Illumina HiSeq 2000	Epididymis	Epididymis	Male Reproductive System	True	Epididymis	Male Reproductive System	Brahman	Male
SAMEA104495761	Bos indicus	PAIRED	Unknown	2 years	Male	ILLUMINA	Illumina HiSeq 2000	Epididymis	Epididymis	Male Reproductive System	True	Epididymis	Male Reproductive System	Brahman	Male
SAMEA104495764	Bos indicus	SINGLE	Unknown	7 weeks	Male	ILLUMINA	Illumina HiSeq 2000	Testis	Testis	Male Reproductive System	Low_quality	Testis	Male Reproductive System	Unknown	Male
SAMEA104495765	Bos indicus	SINGLE	Unknown	2 years	Unknown	ILLUMINA	Illumina HiSeq 2000	Liver	Liver	Liver	Low_quality	Liver	Liver	Unknown	Unknown
SAMEA104495766	Bos indicus	SINGLE	Unknown	2 years	Male	ILLUMINA	Illumina HiSeq 2000	Epididymis	Epididymis	Male Reproductive System	Low_quality	Epididymis	Male Reproductive System	Unknown	Male
SAMEA104495767	Bos indicus	PAIRED	Unknown	2 years	Male	ILLUMINA	Illumina HiSeq 2000	Epididymis	Epididymis	Male Reproductive System	True	Epididymis	Male Reproductive System	Brahman	Male
SAMEA104495768	Bos indicus	SINGLE	Unknown	7 weeks	Male	ILLUMINA	Illumina HiSeq 2000	Testis	Testis	Male Reproductive System	Low_quality	Testis	Male Reproductive System	Unknown	Male
SAMEA104495769	Bos indicus	PAIRED	Unknown	2 years	Male	ILLUMINA	Illumina HiSeq 2000	Testis	Testis	Male Reproductive System	Low_quality	Testis	Male Reproductive System	Unknown	Male
SAMEA104495771	Bos indicus	PAIRED	Unknown	2 years	Male	ILLUMINA	Illumina HiSeq 2000	Testis	Testis	Male Reproductive System	True	Testis	Male Reproductive System	Brahman	Male
SAMEA104495772	Bos indicus	PAIRED	Unknown	2 years	Unknown	ILLUMINA	Illumina HiSeq 2000	Liver	Liver	Liver	True	Liver	Liver	Brahman	Male
SAMEA104495774	Bos indicus	PAIRED	Unknown	2 years	Unknown	ILLUMINA	Illumina HiSeq 2000	Liver	Liver	Liver	True	Liver	Liver	Brahman	Male
SAMEA104495775	Bos indicus	SINGLE	Unknown	2 years	Male	ILLUMINA	Illumina HiSeq 2000	Epididymis	Epididymis	Male Reproductive System	Low_quality	Epididymis	Male Reproductive System	Unknown	Male
SAMEA104495776	Bos indicus	SINGLE	Unknown	2 years	Male	ILLUMINA	Illumina HiSeq 2000	Testis	Testis	Male Reproductive System	Low_quality	Testis	Male Reproductive System	Unknown	Male
SAMEA104495777	Bos indicus	SINGLE	Unknown	2 years	Male	ILLUMINA	Illumina HiSeq 2000	Epididymis	Epididymis	Male Reproductive System	Low_quality	Epididymis	Male Reproductive System	Unknown	Male
SAMEA104495778	Bos indicus	SINGLE	Unknown	2 years	Male	ILLUMINA	Illumina HiSeq 2000	Testis	Testis	Male Reproductive System	Low_quality	Testis	Male Reproductive System	Unknown	Male
SAMEA104495779	Bos indicus	PAIRED	Unknown	2 years	Male	ILLUMINA	Illumina HiSeq 2000	Epididymis	Epididymis	Male Reproductive System	Low_quality	Epididymis	Male Reproductive System	Unknown	Male
SAMEA104495781	Bos indicus	SINGLE	Unknown	2 years	Unknown	ILLUMINA	Illumina HiSeq 2000	Liver	Liver	Liver	Low_quality	Liver	Liver	Unknown	Unknown
SAMEA104495782	Bos indicus	PAIRED	Unknown	2 years	Male	ILLUMINA	Illumina HiSeq 2000	Epididymis	Epididymis	Male Reproductive System	True	Epididymis	Male Reproductive System	Brahman	Male
SAMEA104495783	Bos indicus	PAIRED	Unknown	7 weeks	Male	ILLUMINA	Illumina HiSeq 2000	Testis	Testis	Male Reproductive System	Low_quality	Testis	Male Reproductive System	Unknown	Male
SAMEA104495784	Bos indicus	SINGLE	Unknown	2 years	Male	ILLUMINA	Illumina HiSeq 2000	Epididymis	Epididymis	Male Reproductive System	Low_quality	Epididymis	Male Reproductive System	Unknown	Male
SAMEA104495785	Bos indicus	SINGLE	Unknown	2 years	Male	ILLUMINA	Illumina HiSeq 2000	Epididymis	Epididymis	Male Reproductive System	Low_quality	Epididymis	Male Reproductive System	Unknown	Male
SAMEA104495786	Bos indicus	PAIRED	Unknown	2 years	Male	ILLUMINA	Illumina HiSeq 2000	Epididymis	Epididymis	Male Reproductive System	Low_quality	Epididymis	Male Reproductive System	Unknown	Male
SAMEA104495787	Bos indicus	SINGLE	Unknown	7 weeks	Male	ILLUMINA	Illumina HiSeq 2000	Testis	Testis	Male Reproductive System	Low_quality	Testis	Male Reproductive System	Unknown	Male
SAMEA104495788	Bos indicus	PAIRED	Unknown	2 years	Male	ILLUMINA	Illumina HiSeq 2000	Epididymis	Epididymis	Male Reproductive System	Low_quality	Epididymis	Male Reproductive System	Unknown	Male
SAMEA104495789	Bos indicus	SINGLE	Unknown	2 years	Unknown	ILLUMINA	Illumina HiSeq 2000	Liver	Liver	Liver	Low_quality	Liver	Liver	Unknown	Unknown
SAMEA104495791	Bos indicus	PAIRED	Unknown	2 years	Male	ILLUMINA	Illumina HiSeq 2000	Testis	Testis	Male Reproductive System	True	Testis	Male Reproductive System	Brahman	Male
SAMEA104495795	Bos indicus	SINGLE	Unknown	2 years	Male	ILLUMINA	Illumina HiSeq 2000	Epididymis	Epididymis	Male Reproductive System	Low_quality	Epididymis	Male Reproductive System	Unknown	Male
SAMEA104495796	Bos indicus	PAIRED	Unknown	7 weeks	Male	ILLUMINA	Illumina HiSeq 2000	Testis	Testis	Male Reproductive System	Low_quality	Testis	Male Reproductive System	Unknown	Male
SAMEA104495797	Bos indicus	PAIRED	Unknown	2 years	Unknown	ILLUMINA	Illumina HiSeq 2000	Liver	Liver	Liver	True	Liver	Liver	Brahman	Female
SAMEA104495798	Bos indicus	PAIRED	Unknown	2 years	Male	ILLUMINA	Illumina HiSeq 2000	Testis	Testis	Male Reproductive System	True	Testis	Male Reproductive System	Brahman	Male
SAMEA104495800	Bos indicus	PAIRED	Unknown	2 years	Unknown	ILLUMINA	Illumina HiSeq 2000	Liver	Liver	Liver	True	Liver	Liver	Brahman	Male
SAMEA104495801	Bos indicus	PAIRED	Unknown	2 years	Male	ILLUMINA	Illumina HiSeq 2000	Epididymis	Epididymis	Male Reproductive System	True	Epididymis	Male Reproductive System	Brahman	Male
SAMEA104495802	Bos indicus	SINGLE	Unknown	2 years	Male	ILLUMINA	Illumina HiSeq 2000	Epididymis	Epididymis	Male Reproductive System	Low_quality	Epididymis	Male Reproductive System	Unknown	Male
SAMEA104495804	Bos indicus	PAIRED	Unknown	7 weeks	Male	ILLUMINA	Illumina HiSeq 2000	Testis	Testis	Male Reproductive System	True	Testis	Male Reproductive System	Angus	Male
SAMEA104495805	Bos indicus	PAIRED	Unknown	2 years	Male	ILLUMINA	Illumina HiSeq 2000	Epididymis	Epididymis	Male Reproductive System	True	Epididymis	Male Reproductive System	Brahman	Male
SAMEA104495806	Bos indicus	SINGLE	Unknown	2 years	Male	ILLUMINA	Illumina HiSeq 2000	Testis	Testis	Male Reproductive System	Low_quality	Testis	Male Reproductive System	Unknown	Male
SAMEA104495808	Bos indicus	PAIRED	Unknown	2 years	Male	ILLUMINA	Illumina HiSeq 2000	Testis	Testis	Male Reproductive System	True	Testis	Male Reproductive System	Brahman	Male
SAMEA104495809	Bos indicus	SINGLE	Unknown	2 years	Unknown	ILLUMINA	Illumina HiSeq 2000	Liver	Liver	Liver	Low_quality	Liver	Liver	Unknown	Unknown
SAMEA104495810	Bos indicus	PAIRED	Unknown	2 years	Male	ILLUMINA	Illumina HiSeq 2000	Epididymis	Epididymis	Male Reproductive System	True	Epididymis	Male Reproductive System	Brahman	Male
SAMEA104495811	Bos indicus	SINGLE	Unknown	2 years	Male	ILLUMINA	Illumina HiSeq 2000	Testis	Testis	Male Reproductive System	Low_quality	Testis	Male Reproductive System	Unknown	Male
SAMEA104495812	Bos indicus	SINGLE	Unknown	2 years	Unknown	ILLUMINA	Illumina HiSeq 2000	Liver	Liver	Liver	Low_quality	Liver	Liver	Unknown	Unknown
SAMEA104495813	Bos indicus	SINGLE	Unknown	2 years	Male	ILLUMINA	Illumina HiSeq 2000	Epididymis	Epididymis	Male Reproductive System	Low_quality	Epididymis	Male Reproductive System	Unknown	Male
SAMEA104495814	Bos indicus	SINGLE	Unknown	7 weeks	Male	ILLUMINA	Illumina HiSeq 2000	Testis	Testis	Male Reproductive System	Low_quality	Testis	Male Reproductive System	Unknown	Male
SAMEA104588171	Bos taurus	PAIRED	Unknown	Unknown	Unknown	ILLUMINA	Illumina HiSeq 2000	Alveolar Macrophage	Macrophage	Immune System	True	Macrophage	Immune System	Holstein	Male
SAMEA104588172	Bos taurus	PAIRED	Unknown	Unknown	Unknown	ILLUMINA	Illumina HiSeq 2000	Alveolar Macrophage	Macrophage	Immune System	True	Macrophage	Immune System	Holstein	Male
SAMEA104588173	Bos taurus	PAIRED	Unknown	Unknown	Unknown	ILLUMINA	Illumina HiSeq 2000	Alveolar Macrophage	Macrophage	Immune System	True	Macrophage	Immune System	Holstein	Male
SAMEA104588174	Bos taurus	PAIRED	Unknown	Unknown	Unknown	ILLUMINA	Illumina HiSeq 2000	Alveolar Macrophage	Macrophage	Immune System	True	Macrophage	Immune System	Holstein	Male
SAMEA104588175	Bos taurus	PAIRED	Unknown	Unknown	Unknown	ILLUMINA	Illumina HiSeq 2000	Alveolar Macrophage	Macrophage	Immune System	True	Macrophage	Immune System	Holstein	Male
SAMEA104588176	Bos taurus	PAIRED	Unknown	Unknown	Unknown	ILLUMINA	Illumina HiSeq 2000	Alveolar Macrophage	Macrophage	Immune System	True	Macrophage	Immune System	Holstein	Male
SAMEA104588177	Bos taurus	PAIRED	Unknown	Unknown	Unknown	ILLUMINA	Illumina HiSeq 2000	Alveolar Macrophage	Macrophage	Immune System	True	Macrophage	Immune System	Holstein	Male
SAMEA104588178	Bos taurus	PAIRED	Unknown	Unknown	Unknown	ILLUMINA	Illumina HiSeq 2000	Alveolar Macrophage	Macrophage	Immune System	True	Macrophage	Immune System	Holstein	Male
SAMEA104588179	Bos taurus	PAIRED	Unknown	Unknown	Unknown	ILLUMINA	Illumina HiSeq 2000	Alveolar Macrophage	Macrophage	Immune System	True	Macrophage	Immune System	Holstein	Male
SAMEA104588180	Bos taurus	PAIRED	Unknown	Unknown	Unknown	ILLUMINA	Illumina HiSeq 2000	Alveolar Macrophage	Macrophage	Immune System	True	Macrophage	Immune System	Holstein	Male
SAMEA104588181	Bos taurus	PAIRED	Unknown	Unknown	Unknown	ILLUMINA	Illumina HiSeq 2000	Alveolar Macrophage	Macrophage	Immune System	True	Macrophage	Immune System	Holstein	Male
SAMEA104588182	Bos taurus	PAIRED	Unknown	Unknown	Unknown	ILLUMINA	Illumina HiSeq 2000	Alveolar Macrophage	Macrophage	Immune System	True	Macrophage	Immune System	Holstein	Male
SAMEA104588183	Bos taurus	PAIRED	Unknown	Unknown	Unknown	ILLUMINA	Illumina HiSeq 2000	Alveolar Macrophage	Macrophage	Immune System	True	Macrophage	Immune System	Holstein	Male
SAMEA104588184	Bos taurus	PAIRED	Unknown	Unknown	Unknown	ILLUMINA	Illumina HiSeq 2000	Alveolar Macrophage	Macrophage	Immune System	True	Macrophage	Immune System	Holstein	Male
SAMEA104588185	Bos taurus	PAIRED	Unknown	Unknown	Unknown	ILLUMINA	Illumina HiSeq 2000	Alveolar Macrophage	Macrophage	Immune System	True	Macrophage	Immune System	Holstein	Male
SAMEA104588186	Bos taurus	PAIRED	Unknown	Unknown	Unknown	ILLUMINA	Illumina HiSeq 2000	Alveolar Macrophage	Macrophage	Immune System	True	Macrophage	Immune System	Holstein	Male
SAMEA104588187	Bos taurus	PAIRED	Unknown	Unknown	Unknown	ILLUMINA	Illumina HiSeq 2000	Alveolar Macrophage	Macrophage	Immune System	True	Macrophage	Immune System	Holstein	Male
SAMEA104588188	Bos taurus	PAIRED	Unknown	Unknown	Unknown	ILLUMINA	Illumina HiSeq 2000	Alveolar Macrophage	Macrophage	Immune System	True	Macrophage	Immune System	Holstein	Male
SAMEA104588189	Bos taurus	PAIRED	Unknown	Unknown	Unknown	ILLUMINA	Illumina HiSeq 2000	Alveolar Macrophage	Macrophage	Immune System	True	Macrophage	Immune System	Holstein	Male
SAMEA104588190	Bos taurus	PAIRED	Unknown	Unknown	Unknown	ILLUMINA	Illumina HiSeq 2000	Alveolar Macrophage	Macrophage	Immune System	True	Macrophage	Immune System	Holstein	Male
SAMEA104588191	Bos taurus	PAIRED	Unknown	Unknown	Unknown	ILLUMINA	Illumina HiSeq 2000	Alveolar Macrophage	Macrophage	Immune System	True	Macrophage	Immune System	Holstein	Male
SAMEA104588192	Bos taurus	PAIRED	Unknown	Unknown	Unknown	ILLUMINA	Illumina HiSeq 2000	Alveolar Macrophage	Macrophage	Immune System	True	Macrophage	Immune System	Holstein	Male
SAMEA104588193	Bos taurus	PAIRED	Unknown	Unknown	Unknown	ILLUMINA	Illumina HiSeq 2000	Alveolar Macrophage	Macrophage	Immune System	True	Macrophage	Immune System	Holstein	Male
SAMEA104588194	Bos taurus	PAIRED	Unknown	Unknown	Unknown	ILLUMINA	Illumina HiSeq 2000	Alveolar Macrophage	Macrophage	Immune System	True	Macrophage	Immune System	Holstein	Male
SAMEA104588195	Bos taurus	PAIRED	Unknown	Unknown	Unknown	ILLUMINA	Illumina HiSeq 2000	Alveolar Macrophage	Macrophage	Immune System	True	Macrophage	Immune System	Holstein	Male
SAMEA104588196	Bos taurus	PAIRED	Unknown	Unknown	Unknown	ILLUMINA	Illumina HiSeq 2000	Alveolar Macrophage	Macrophage	Immune System	True	Macrophage	Immune System	Holstein	Male
SAMEA104588197	Bos taurus	PAIRED	Unknown	Unknown	Unknown	ILLUMINA	Illumina HiSeq 2000	Alveolar Macrophage	Macrophage	Immune System	True	Macrophage	Immune System	Holstein	Male
SAMEA104588198	Bos taurus	PAIRED	Unknown	Unknown	Unknown	ILLUMINA	Illumina HiSeq 2000	Alveolar Macrophage	Macrophage	Immune System	True	Macrophage	Immune System	Holstein	Male
SAMEA104588199	Bos taurus	PAIRED	Unknown	Unknown	Unknown	ILLUMINA	Illumina HiSeq 2000	Alveolar Macrophage	Macrophage	Immune System	True	Macrophage	Immune System	Holstein	Male
SAMEA104588200	Bos taurus	PAIRED	Unknown	Unknown	Unknown	ILLUMINA	Illumina HiSeq 2000	Alveolar Macrophage	Macrophage	Immune System	True	Macrophage	Immune System	Holstein	Male
SAMEA104588201	Bos taurus	PAIRED	Unknown	Unknown	Unknown	ILLUMINA	Illumina HiSeq 2000	Alveolar Macrophage	Macrophage	Immune System	True	Macrophage	Immune System	Holstein	Male
SAMEA104588202	Bos taurus	PAIRED	Unknown	Unknown	Unknown	ILLUMINA	Illumina HiSeq 2000	Alveolar Macrophage	Macrophage	Immune System	True	Macrophage	Immune System	Holstein	Male
SAMEA104588203	Bos taurus	PAIRED	Unknown	Unknown	Unknown	ILLUMINA	Illumina HiSeq 2000	Alveolar Macrophage	Macrophage	Immune System	True	Macrophage	Immune System	Holstein	Male
SAMEA104588204	Bos taurus	PAIRED	Unknown	Unknown	Unknown	ILLUMINA	Illumina HiSeq 2000	Alveolar Macrophage	Macrophage	Immune System	True	Macrophage	Immune System	Holstein	Male
SAMEA104588205	Bos taurus	PAIRED	Unknown	Unknown	Unknown	ILLUMINA	Illumina HiSeq 2000	Alveolar Macrophage	Macrophage	Immune System	True	Macrophage	Immune System	Holstein	Male
SAMEA104588206	Bos taurus	PAIRED	Unknown	Unknown	Unknown	ILLUMINA	Illumina HiSeq 2000	Alveolar Macrophage	Macrophage	Immune System	True	Macrophage	Immune System	Holstein	Male
SAMEA104588207	Bos taurus	PAIRED	Unknown	Unknown	Unknown	ILLUMINA	Illumina HiSeq 2000	Alveolar Macrophage	Macrophage	Immune System	True	Macrophage	Immune System	Holstein	Male
SAMEA104588208	Bos taurus	PAIRED	Unknown	Unknown	Unknown	ILLUMINA	Illumina HiSeq 2000	Alveolar Macrophage	Macrophage	Immune System	True	Macrophage	Immune System	Holstein	Male
SAMEA104588209	Bos taurus	PAIRED	Unknown	Unknown	Unknown	ILLUMINA	Illumina HiSeq 2000	Alveolar Macrophage	Macrophage	Immune System	True	Macrophage	Immune System	Holstein	Male
SAMEA104588210	Bos taurus	PAIRED	Unknown	Unknown	Unknown	ILLUMINA	Illumina HiSeq 2000	Alveolar Macrophage	Macrophage	Immune System	True	Macrophage	Immune System	Holstein	Male
SAMEA104588211	Bos taurus	PAIRED	Unknown	Unknown	Unknown	ILLUMINA	Illumina HiSeq 2000	Alveolar Macrophage	Macrophage	Immune System	True	Macrophage	Immune System	Holstein	Male
SAMEA104588212	Bos taurus	PAIRED	Unknown	Unknown	Unknown	ILLUMINA	Illumina HiSeq 2000	Alveolar Macrophage	Macrophage	Immune System	True	Macrophage	Immune System	Holstein	Male
SAMEA104588213	Bos taurus	PAIRED	Unknown	Unknown	Unknown	ILLUMINA	Illumina HiSeq 2000	Alveolar Macrophage	Macrophage	Immune System	True	Macrophage	Immune System	Holstein	Male
SAMEA104588214	Bos taurus	PAIRED	Unknown	Unknown	Unknown	ILLUMINA	Illumina HiSeq 2000	Alveolar Macrophage	Macrophage	Immune System	True	Macrophage	Immune System	Holstein	Male
SAMEA104588215	Bos taurus	PAIRED	Unknown	Unknown	Unknown	ILLUMINA	Illumina HiSeq 2000	Alveolar Macrophage	Macrophage	Immune System	True	Macrophage	Immune System	Holstein	Male
SAMEA104588216	Bos taurus	PAIRED	Unknown	Unknown	Unknown	ILLUMINA	Illumina HiSeq 2000	Alveolar Macrophage	Macrophage	Immune System	True	Macrophage	Immune System	Holstein	Male
SAMEA104588217	Bos taurus	PAIRED	Unknown	Unknown	Unknown	ILLUMINA	Illumina HiSeq 2000	Alveolar Macrophage	Macrophage	Immune System	True	Macrophage	Immune System	Holstein	Male
SAMEA104588218	Bos taurus	PAIRED	Unknown	Unknown	Unknown	ILLUMINA	Illumina HiSeq 2000	Alveolar Macrophage	Macrophage	Immune System	True	Macrophage	Immune System	Holstein	Male
SAMEA104588219	Bos taurus	PAIRED	Unknown	Unknown	Unknown	ILLUMINA	Illumina HiSeq 2000	Alveolar Macrophage	Macrophage	Immune System	True	Macrophage	Immune System	Holstein	Male
SAMEA104588220	Bos taurus	PAIRED	Unknown	Unknown	Unknown	ILLUMINA	Illumina HiSeq 2000	Alveolar Macrophage	Macrophage	Immune System	True	Macrophage	Immune System	Holstein	Male
SAMEA104588221	Bos taurus	PAIRED	Unknown	Unknown	Unknown	ILLUMINA	Illumina HiSeq 2000	Alveolar Macrophage	Macrophage	Immune System	True	Macrophage	Immune System	Holstein	Male
SAMEA104588222	Bos taurus	PAIRED	Unknown	Unknown	Unknown	ILLUMINA	Illumina HiSeq 2000	Alveolar Macrophage	Macrophage	Immune System	True	Macrophage	Immune System	Holstein	Male
SAMEA104588223	Bos taurus	PAIRED	Unknown	Unknown	Unknown	ILLUMINA	Illumina HiSeq 2000	Alveolar Macrophage	Macrophage	Immune System	True	Macrophage	Immune System	Holstein	Male
SAMEA104588224	Bos taurus	PAIRED	Unknown	Unknown	Unknown	ILLUMINA	Illumina HiSeq 2000	Alveolar Macrophage	Macrophage	Immune System	True	Macrophage	Immune System	Holstein	Male
SAMEA104588225	Bos taurus	PAIRED	Unknown	Unknown	Unknown	ILLUMINA	Illumina HiSeq 2000	Alveolar Macrophage	Macrophage	Immune System	True	Macrophage	Immune System	Holstein	Male
SAMEA104588226	Bos taurus	PAIRED	Unknown	Unknown	Unknown	ILLUMINA	Illumina HiSeq 2000	Alveolar Macrophage	Macrophage	Immune System	True	Macrophage	Immune System	Holstein	Male
SAMEA104588227	Bos taurus	PAIRED	Unknown	Unknown	Unknown	ILLUMINA	Illumina HiSeq 2000	Alveolar Macrophage	Macrophage	Immune System	True	Macrophage	Immune System	Holstein	Male
SAMEA104588228	Bos taurus	PAIRED	Unknown	Unknown	Unknown	ILLUMINA	Illumina HiSeq 2000	Alveolar Macrophage	Macrophage	Immune System	True	Macrophage	Immune System	Holstein	Male
SAMEA104588229	Bos taurus	PAIRED	Unknown	Unknown	Unknown	ILLUMINA	Illumina HiSeq 2000	Alveolar Macrophage	Macrophage	Immune System	True	Macrophage	Immune System	Holstein	Male
SAMEA104588230	Bos taurus	PAIRED	Unknown	Unknown	Unknown	ILLUMINA	Illumina HiSeq 2000	Alveolar Macrophage	Macrophage	Immune System	True	Macrophage	Immune System	Holstein	Male
SAMEA104588231	Bos taurus	PAIRED	Unknown	Unknown	Unknown	ILLUMINA	Illumina HiSeq 2000	Alveolar Macrophage	Macrophage	Immune System	True	Macrophage	Immune System	Holstein	Male
SAMEA104588232	Bos taurus	PAIRED	Unknown	Unknown	Unknown	ILLUMINA	Illumina HiSeq 2000	Alveolar Macrophage	Macrophage	Immune System	True	Macrophage	Immune System	Holstein	Male
SAMEA104588233	Bos taurus	PAIRED	Unknown	Unknown	Unknown	ILLUMINA	Illumina HiSeq 2000	Alveolar Macrophage	Macrophage	Immune System	True	Macrophage	Immune System	Holstein	Male
SAMEA104588234	Bos taurus	PAIRED	Unknown	Unknown	Unknown	ILLUMINA	Illumina HiSeq 2000	Alveolar Macrophage	Macrophage	Immune System	True	Macrophage	Immune System	Holstein	Male
SAMEA104588235	Bos taurus	PAIRED	Unknown	Unknown	Unknown	ILLUMINA	Illumina HiSeq 2000	Alveolar Macrophage	Macrophage	Immune System	True	Macrophage	Immune System	Holstein	Male
SAMEA104588236	Bos taurus	PAIRED	Unknown	Unknown	Unknown	ILLUMINA	Illumina HiSeq 2000	Alveolar Macrophage	Macrophage	Immune System	True	Macrophage	Immune System	Holstein	Male
SAMEA104588237	Bos taurus	PAIRED	Unknown	Unknown	Unknown	ILLUMINA	Illumina HiSeq 2000	Alveolar Macrophage	Macrophage	Immune System	True	Macrophage	Immune System	Holstein	Male
SAMEA104588238	Bos taurus	PAIRED	Unknown	Unknown	Unknown	ILLUMINA	Illumina HiSeq 2000	Alveolar Macrophage	Macrophage	Immune System	True	Macrophage	Immune System	Holstein	Male
SAMEA104588239	Bos taurus	PAIRED	Unknown	Unknown	Unknown	ILLUMINA	Illumina HiSeq 2000	Alveolar Macrophage	Macrophage	Immune System	True	Macrophage	Immune System	Holstein	Male
SAMEA104588240	Bos taurus	PAIRED	Unknown	Unknown	Unknown	ILLUMINA	Illumina HiSeq 2000	Alveolar Macrophage	Macrophage	Immune System	True	Macrophage	Immune System	Holstein	Male
SAMEA104588241	Bos taurus	PAIRED	Unknown	Unknown	Unknown	ILLUMINA	Illumina HiSeq 2000	Alveolar Macrophage	Macrophage	Immune System	True	Macrophage	Immune System	Holstein	Male
SAMEA104588242	Bos taurus	PAIRED	Unknown	Unknown	Unknown	ILLUMINA	Illumina HiSeq 2000	Alveolar Macrophage	Macrophage	Immune System	True	Macrophage	Immune System	Holstein	Male
SAMEA104588243	Bos taurus	PAIRED	Unknown	Unknown	Unknown	ILLUMINA	Illumina HiSeq 2000	Alveolar Macrophage	Macrophage	Immune System	True	Macrophage	Immune System	Holstein	Male
SAMEA104588244	Bos taurus	PAIRED	Unknown	Unknown	Unknown	ILLUMINA	Illumina HiSeq 2000	Alveolar Macrophage	Macrophage	Immune System	True	Macrophage	Immune System	Holstein	Male
SAMEA104588245	Bos taurus	PAIRED	Unknown	Unknown	Unknown	ILLUMINA	Illumina HiSeq 2000	Alveolar Macrophage	Macrophage	Immune System	True	Macrophage	Immune System	Holstein	Male
SAMEA104588246	Bos taurus	PAIRED	Unknown	Unknown	Unknown	ILLUMINA	Illumina HiSeq 2000	Alveolar Macrophage	Macrophage	Immune System	True	Macrophage	Immune System	Holstein	Male
SAMEA104588247	Bos taurus	PAIRED	Unknown	Unknown	Unknown	ILLUMINA	Illumina HiSeq 2000	Alveolar Macrophage	Macrophage	Immune System	True	Macrophage	Immune System	Holstein	Male
SAMEA104588248	Bos taurus	PAIRED	Unknown	Unknown	Unknown	ILLUMINA	Illumina HiSeq 2000	Alveolar Macrophage	Macrophage	Immune System	True	Macrophage	Immune System	Holstein	Male
SAMEA104588249	Bos taurus	PAIRED	Unknown	Unknown	Unknown	ILLUMINA	Illumina HiSeq 2000	Alveolar Macrophage	Macrophage	Immune System	True	Macrophage	Immune System	Holstein	Male
SAMEA104588250	Bos taurus	PAIRED	Unknown	Unknown	Unknown	ILLUMINA	Illumina HiSeq 2000	Alveolar Macrophage	Macrophage	Immune System	True	Macrophage	Immune System	Holstein	Male
SAMEA104588251	Bos taurus	PAIRED	Unknown	Unknown	Unknown	ILLUMINA	Illumina HiSeq 2000	Alveolar Macrophage	Macrophage	Immune System	True	Macrophage	Immune System	Holstein	Male
SAMEA104588252	Bos taurus	PAIRED	Unknown	Unknown	Unknown	ILLUMINA	Illumina HiSeq 2000	Alveolar Macrophage	Macrophage	Immune System	True	Macrophage	Immune System	Holstein	Male
SAMEA104588253	Bos taurus	PAIRED	Unknown	Unknown	Unknown	ILLUMINA	Illumina HiSeq 2000	Alveolar Macrophage	Macrophage	Immune System	True	Macrophage	Immune System	Holstein	Male
SAMEA104588254	Bos taurus	PAIRED	Unknown	Unknown	Unknown	ILLUMINA	Illumina HiSeq 2000	Alveolar Macrophage	Macrophage	Immune System	True	Macrophage	Immune System	Holstein	Male
SAMEA104588255	Bos taurus	PAIRED	Unknown	Unknown	Unknown	ILLUMINA	Illumina HiSeq 2000	Alveolar Macrophage	Macrophage	Immune System	True	Macrophage	Immune System	Holstein	Male
SAMEA104588256	Bos taurus	PAIRED	Unknown	Unknown	Unknown	ILLUMINA	Illumina HiSeq 2000	Alveolar Macrophage	Macrophage	Immune System	True	Macrophage	Immune System	Holstein	Male
SAMEA104588257	Bos taurus	PAIRED	Unknown	Unknown	Unknown	ILLUMINA	Illumina HiSeq 2000	Alveolar Macrophage	Macrophage	Immune System	True	Macrophage	Immune System	Holstein	Male
SAMEA104588258	Bos taurus	PAIRED	Unknown	Unknown	Unknown	ILLUMINA	Illumina HiSeq 2000	Alveolar Macrophage	Macrophage	Immune System	True	Macrophage	Immune System	Holstein	Male
SAMEA104588259	Bos taurus	PAIRED	Unknown	Unknown	Unknown	ILLUMINA	Illumina HiSeq 2000	Alveolar Macrophage	Macrophage	Immune System	True	Macrophage	Immune System	Holstein	Male
SAMEA104588260	Bos taurus	PAIRED	Unknown	Unknown	Unknown	ILLUMINA	Illumina HiSeq 2000	Alveolar Macrophage	Macrophage	Immune System	True	Macrophage	Immune System	Holstein	Male
SAMEA104588261	Bos taurus	PAIRED	Unknown	Unknown	Unknown	ILLUMINA	Illumina HiSeq 2000	Alveolar Macrophage	Macrophage	Immune System	True	Macrophage	Immune System	Holstein	Male
SAMEA104588262	Bos taurus	PAIRED	Unknown	Unknown	Unknown	ILLUMINA	Illumina HiSeq 2000	Alveolar Macrophage	Macrophage	Immune System	True	Macrophage	Immune System	Holstein	Male
SAMEA104588263	Bos taurus	PAIRED	Unknown	Unknown	Unknown	ILLUMINA	Illumina HiSeq 2000	Alveolar Macrophage	Macrophage	Immune System	True	Macrophage	Immune System	Holstein	Male
SAMEA104588264	Bos taurus	PAIRED	Unknown	Unknown	Unknown	ILLUMINA	Illumina HiSeq 2000	Alveolar Macrophage	Macrophage	Immune System	True	Macrophage	Immune System	Holstein	Male
SAMEA104588265	Bos taurus	PAIRED	Unknown	Unknown	Unknown	ILLUMINA	Illumina HiSeq 2000	Alveolar Macrophage	Macrophage	Immune System	True	Macrophage	Immune System	Holstein	Male
SAMEA104588266	Bos taurus	PAIRED	Unknown	Unknown	Unknown	ILLUMINA	Illumina HiSeq 2000	Alveolar Macrophage	Macrophage	Immune System	True	Macrophage	Immune System	Holstein	Male
SAMEA104588267	Bos taurus	PAIRED	Unknown	Unknown	Unknown	ILLUMINA	Illumina HiSeq 2000	Alveolar Macrophage	Macrophage	Immune System	True	Macrophage	Immune System	Holstein	Male
SAMEA104588268	Bos taurus	PAIRED	Unknown	Unknown	Unknown	ILLUMINA	Illumina HiSeq 2000	Alveolar Macrophage	Macrophage	Immune System	True	Macrophage	Immune System	Holstein	Male
SAMEA104588269	Bos taurus	PAIRED	Unknown	Unknown	Unknown	ILLUMINA	Illumina HiSeq 2000	Alveolar Macrophage	Macrophage	Immune System	True	Macrophage	Immune System	Holstein	Male
SAMEA104588270	Bos taurus	PAIRED	Unknown	Unknown	Unknown	ILLUMINA	Illumina HiSeq 2000	Alveolar Macrophage	Macrophage	Immune System	True	Macrophage	Immune System	Holstein	Male
SAMEA104588271	Bos taurus	PAIRED	Unknown	Unknown	Unknown	ILLUMINA	Illumina HiSeq 2000	Alveolar Macrophage	Macrophage	Immune System	True	Macrophage	Immune System	Holstein	Male
SAMEA104588272	Bos taurus	PAIRED	Unknown	Unknown	Unknown	ILLUMINA	Illumina HiSeq 2000	Alveolar Macrophage	Macrophage	Immune System	True	Macrophage	Immune System	Holstein	Male
SAMEA104588273	Bos taurus	PAIRED	Unknown	Unknown	Unknown	ILLUMINA	Illumina HiSeq 2000	Alveolar Macrophage	Macrophage	Immune System	True	Macrophage	Immune System	Holstein	Male
SAMEA104588274	Bos taurus	PAIRED	Unknown	Unknown	Unknown	ILLUMINA	Illumina HiSeq 2000	Alveolar Macrophage	Macrophage	Immune System	True	Macrophage	Immune System	Holstein	Male
SAMEA104588275	Bos taurus	PAIRED	Unknown	Unknown	Unknown	ILLUMINA	Illumina HiSeq 2000	Alveolar Macrophage	Macrophage	Immune System	True	Macrophage	Immune System	Holstein	Male
SAMEA104588276	Bos taurus	PAIRED	Unknown	Unknown	Unknown	ILLUMINA	Illumina HiSeq 2000	Alveolar Macrophage	Macrophage	Immune System	True	Macrophage	Immune System	Holstein	Male
SAMEA104588277	Bos taurus	PAIRED	Unknown	Unknown	Unknown	ILLUMINA	Illumina HiSeq 2000	Alveolar Macrophage	Macrophage	Immune System	True	Macrophage	Immune System	Holstein	Male
SAMEA104588278	Bos taurus	PAIRED	Unknown	Unknown	Unknown	ILLUMINA	Illumina HiSeq 2000	Alveolar Macrophage	Macrophage	Immune System	True	Macrophage	Immune System	Holstein	Male
SAMEA104588279	Bos taurus	PAIRED	Unknown	Unknown	Unknown	ILLUMINA	Illumina HiSeq 2000	Alveolar Macrophage	Macrophage	Immune System	True	Macrophage	Immune System	Holstein	Male
SAMEA104588280	Bos taurus	PAIRED	Unknown	Unknown	Unknown	ILLUMINA	Illumina HiSeq 2000	Alveolar Macrophage	Macrophage	Immune System	True	Macrophage	Immune System	Holstein	Male
SAMEA104588281	Bos taurus	PAIRED	Unknown	Unknown	Unknown	ILLUMINA	Illumina HiSeq 2000	Alveolar Macrophage	Macrophage	Immune System	True	Macrophage	Immune System	Holstein	Male
SAMEA104588282	Bos taurus	PAIRED	Unknown	Unknown	Unknown	ILLUMINA	Illumina HiSeq 2000	Alveolar Macrophage	Macrophage	Immune System	True	Macrophage	Immune System	Holstein	Male
SAMEA104588283	Bos taurus	PAIRED	Unknown	Unknown	Unknown	ILLUMINA	Illumina HiSeq 2000	Alveolar Macrophage	Macrophage	Immune System	True	Macrophage	Immune System	Holstein	Male
SAMEA104588284	Bos taurus	PAIRED	Unknown	Unknown	Unknown	ILLUMINA	Illumina HiSeq 2000	Alveolar Macrophage	Macrophage	Immune System	True	Macrophage	Immune System	Holstein	Male
SAMEA104588285	Bos taurus	PAIRED	Unknown	Unknown	Unknown	ILLUMINA	Illumina HiSeq 2000	Alveolar Macrophage	Macrophage	Immune System	True	Macrophage	Immune System	Holstein	Male
SAMEA104588286	Bos taurus	PAIRED	Unknown	Unknown	Unknown	ILLUMINA	Illumina HiSeq 2000	Alveolar Macrophage	Macrophage	Immune System	True	Macrophage	Immune System	Holstein	Male
SAMEA104588287	Bos taurus	PAIRED	Unknown	Unknown	Unknown	ILLUMINA	Illumina HiSeq 2000	Alveolar Macrophage	Macrophage	Immune System	True	Macrophage	Immune System	Holstein	Male
SAMEA104588288	Bos taurus	PAIRED	Unknown	Unknown	Unknown	ILLUMINA	Illumina HiSeq 2000	Alveolar Macrophage	Macrophage	Immune System	True	Macrophage	Immune System	Holstein	Male
SAMEA104588289	Bos taurus	PAIRED	Unknown	Unknown	Unknown	ILLUMINA	Illumina HiSeq 2000	Alveolar Macrophage	Macrophage	Immune System	True	Macrophage	Immune System	Holstein	Male
SAMEA104588290	Bos taurus	PAIRED	Unknown	Unknown	Unknown	ILLUMINA	Illumina HiSeq 2000	Alveolar Macrophage	Macrophage	Immune System	True	Macrophage	Immune System	Holstein	Male
SAMEA104588291	Bos taurus	PAIRED	Unknown	Unknown	Unknown	ILLUMINA	Illumina HiSeq 2000	Alveolar Macrophage	Macrophage	Immune System	True	Macrophage	Immune System	Holstein	Male
SAMEA104588292	Bos taurus	PAIRED	Unknown	Unknown	Unknown	ILLUMINA	Illumina HiSeq 2000	Alveolar Macrophage	Macrophage	Immune System	True	Macrophage	Immune System	Holstein	Male
SAMEA104588293	Bos taurus	PAIRED	Unknown	Unknown	Unknown	ILLUMINA	Illumina HiSeq 2000	Alveolar Macrophage	Macrophage	Immune System	True	Macrophage	Immune System	Holstein	Male
SAMEA104588294	Bos taurus	PAIRED	Unknown	Unknown	Unknown	ILLUMINA	Illumina HiSeq 2000	Alveolar Macrophage	Macrophage	Immune System	True	Macrophage	Immune System	Holstein	Male
SAMEA104588295	Bos taurus	PAIRED	Unknown	Unknown	Unknown	ILLUMINA	Illumina HiSeq 2000	Alveolar Macrophage	Macrophage	Immune System	True	Macrophage	Immune System	Holstein	Male
SAMEA104588296	Bos taurus	PAIRED	Unknown	Unknown	Unknown	ILLUMINA	Illumina HiSeq 2000	Alveolar Macrophage	Macrophage	Immune System	True	Macrophage	Immune System	Holstein	Male
SAMEA104588297	Bos taurus	PAIRED	Unknown	Unknown	Unknown	ILLUMINA	Illumina HiSeq 2000	Alveolar Macrophage	Macrophage	Immune System	True	Macrophage	Immune System	Holstein	Male
SAMEA104618855	Bos indicus	PAIRED	Unknown	12 months	Female	ILLUMINA	Illumina HiSeq 2000	Right Ovary	Ovary	Female Reproductive System	True	Ovary	Female Reproductive System	Brahman	Female
SAMEA104618856	Bos indicus	PAIRED	Unknown	12 months	Female	ILLUMINA	Illumina HiSeq 2000	liver	Liver	Liver	True	Liver	Liver	Brahman	Female
SAMEA104618857	Bos indicus	PAIRED	Unknown	12 months	Female	ILLUMINA	Illumina HiSeq 2000	Left ovary	Ovary	Female Reproductive System	True	Ovary	Female Reproductive System	Brahman	Female
SAMEA104618858	Bos indicus	PAIRED	Unknown	12 months	Female	ILLUMINA	Illumina HiSeq 2000	Hypothalamus	Hypothalamus	Nervous System	True	Hypothalamus	Nervous System	Brahman	Female
SAMEA104618859	Bos indicus	PAIRED	Unknown	12 months	Female	ILLUMINA	Illumina HiSeq 2000	Left ovary	Ovary	Female Reproductive System	True	Ovary	Female Reproductive System	Brahman	Female
SAMEA104618860	Bos indicus	PAIRED	Unknown	12 months	Female	ILLUMINA	Illumina HiSeq 2000	Pituitary gland	Pituitary	Nervous System	True	Pituitary	Nervous System	Nelore	Female
SAMEA104618861	Bos indicus	PAIRED	Unknown	12 months	Female	ILLUMINA	Illumina HiSeq 2000	Hypothalamus	Hypothalamus	Nervous System	True	Hypothalamus	Nervous System	Brahman	Female
SAMEA104618862	Bos indicus	PAIRED	Unknown	12 months	Female	ILLUMINA	Illumina HiSeq 2000	liver	Liver	Liver	True	Liver	Liver	Brahman	Female
SAMEA104618863	Bos indicus	PAIRED	Unknown	12 months	Female	ILLUMINA	Illumina HiSeq 2000	Left ovary	Ovary	Female Reproductive System	True	Ovary	Female Reproductive System	Brahman	Female
SAMEA104618864	Bos indicus	PAIRED	Unknown	12 months	Female	ILLUMINA	Illumina HiSeq 2000	Right ovary	Ovary	Female Reproductive System	True	Ovary	Female Reproductive System	Brahman	Female
SAMEA104618866	Bos indicus	PAIRED	Unknown	12 months	Female	ILLUMINA	Illumina HiSeq 2000	Hypothalamus	Hypothalamus	Nervous System	True	Hypothalamus	Nervous System	Brahman	Female
SAMEA104618867	Bos indicus	PAIRED	Unknown	12 months	Female	ILLUMINA	Illumina HiSeq 2000	liver	Liver	Liver	True	Liver	Liver	Nelore	Female
SAMEA104618868	Bos indicus	PAIRED	Unknown	12 months	Female	ILLUMINA	Illumina HiSeq 2000	Right ovary	Ovary	Female Reproductive System	True	Ovary	Female Reproductive System	Brahman	Female
SAMEA104618869	Bos indicus	PAIRED	Unknown	12 months	Female	ILLUMINA	Illumina HiSeq 2000	liver	Liver	Liver	True	Liver	Liver	Brahman	Female
SAMEA104618870	Bos indicus	PAIRED	Unknown	12 months	Female	ILLUMINA	Illumina HiSeq 2000	Hypothalamus	Hypothalamus	Nervous System	True	Hypothalamus	Nervous System	Nelore	Female
SAMEA104618871	Bos indicus	PAIRED	Unknown	12 months	Female	ILLUMINA	Illumina HiSeq 2000	Left ovary	Ovary	Female Reproductive System	True	Ovary	Female Reproductive System	Brahman	Female
SAMEA104618872	Bos indicus	PAIRED	Unknown	12 months	Female	ILLUMINA	Illumina HiSeq 2000	Pituitary gland	Pituitary	Nervous System	True	Pituitary	Nervous System	Brahman	Female
SAMEA104618873	Bos indicus	PAIRED	Unknown	12 months	Female	ILLUMINA	Illumina HiSeq 2000	Right ovary	Ovary	Female Reproductive System	True	Ovary	Female Reproductive System	Brahman	Female
SAMEA104618874	Bos indicus	PAIRED	Unknown	12 months	Female	ILLUMINA	Illumina HiSeq 2000	Right ovary	Ovary	Female Reproductive System	True	Ovary	Female Reproductive System	Brahman	Female
SAMEA104618875	Bos indicus	PAIRED	Unknown	12 months	Female	ILLUMINA	Illumina HiSeq 2000	Left ovary	Ovary	Female Reproductive System	True	Ovary	Female Reproductive System	Brahman	Female
SAMEA104618876	Bos indicus	PAIRED	Unknown	12 months	Female	ILLUMINA	Illumina HiSeq 2000	Hypothalamus	Hypothalamus	Nervous System	True	Hypothalamus	Nervous System	Brahman	Female
SAMEA104618877	Bos indicus	PAIRED	Unknown	12 months	Female	ILLUMINA	Illumina HiSeq 2000	Hypothalamus	Hypothalamus	Nervous System	True	Hypothalamus	Nervous System	Brahman	Female
SAMEA104618878	Bos indicus	PAIRED	Unknown	12 months	Female	ILLUMINA	Illumina HiSeq 2000	liver	Liver	Liver	True	Liver	Liver	Brahman	Female
SAMEA104618879	Bos indicus	PAIRED	Unknown	12 months	Female	ILLUMINA	Illumina HiSeq 2000	Left ovary	Ovary	Female Reproductive System	True	Ovary	Female Reproductive System	Brahman	Female
SAMEA104618880	Bos indicus	PAIRED	Unknown	12 months	Female	ILLUMINA	Illumina HiSeq 2000	liver	Liver	Liver	True	Liver	Liver	Brahman	Female
SAMEA104618881	Bos indicus	PAIRED	Unknown	12 months	Female	ILLUMINA	Illumina HiSeq 2000	Hypothalamus	Hypothalamus	Nervous System	True	Hypothalamus	Nervous System	Brahman	Female
SAMEA104618882	Bos indicus	PAIRED	Unknown	12 months	Female	ILLUMINA	Illumina HiSeq 2000	Right ovary	Ovary	Female Reproductive System	True	Ovary	Female Reproductive System	Brahman	Female
SAMEA104618883	Bos indicus	PAIRED	Unknown	12 months	Female	ILLUMINA	Illumina HiSeq 2000	Hypothalamus	Hypothalamus	Nervous System	True	Hypothalamus	Nervous System	Brahman	Female
SAMEA104618884	Bos indicus	PAIRED	Unknown	12 months	Female	ILLUMINA	Illumina HiSeq 2000	Hypothalamus	Hypothalamus	Nervous System	True	Hypothalamus	Nervous System	Brahman	Female
SAMEA104618885	Bos indicus	PAIRED	Unknown	12 months	Female	ILLUMINA	Illumina HiSeq 2000	Right ovary	Ovary	Female Reproductive System	True	Ovary	Female Reproductive System	Brahman	Female
SAMEA104618886	Bos indicus	PAIRED	Unknown	12 months	Female	ILLUMINA	Illumina HiSeq 2000	Left ovary	Ovary	Female Reproductive System	True	Ovary	Female Reproductive System	Brahman	Female
SAMEA104618887	Bos indicus	PAIRED	Unknown	12 months	Female	ILLUMINA	Illumina HiSeq 2000	liver	Liver	Liver	True	Liver	Liver	Brahman	Female
SAMEA104618889	Bos indicus	PAIRED	Unknown	12 months	Female	ILLUMINA	Illumina HiSeq 2000	liver	Liver	Liver	True	Liver	Liver	Brahman	Female
SAMEA104618890	Bos indicus	PAIRED	Unknown	12 months	Female	ILLUMINA	Illumina HiSeq 2000	Left ovary	Ovary	Female Reproductive System	True	Ovary	Female Reproductive System	Brahman	Female
SAMEA104618891	Bos indicus	PAIRED	Unknown	12 months	Female	ILLUMINA	Illumina HiSeq 2000	Left ovary	Ovary	Female Reproductive System	True	Ovary	Female Reproductive System	Brahman	Female
SAMEA104618892	Bos indicus	PAIRED	Unknown	12 months	Female	ILLUMINA	Illumina HiSeq 2000	Hypothalamus	Hypothalamus	Nervous System	True	Hypothalamus	Nervous System	Brahman	Female
SAMEA104618893	Bos indicus	PAIRED	Unknown	12 months	Female	ILLUMINA	Illumina HiSeq 2000	liver	Liver	Liver	True	Liver	Liver	Brahman	Female
SAMEA104618894	Bos indicus	PAIRED	Unknown	12 months	Female	ILLUMINA	Illumina HiSeq 2000	Uterus	Uterus	Female Reproductive System	True	Uterus	Female Reproductive System	Brahman	Female
SAMEA104618896	Bos indicus	PAIRED	Unknown	12 months	Female	ILLUMINA	Illumina HiSeq 2000	liver	Liver	Liver	True	Liver	Liver	Brahman	Female
SAMEA104618898	Bos indicus	PAIRED	Unknown	12 months	Female	ILLUMINA	Illumina HiSeq 2000	Hypothalamus	Hypothalamus	Nervous System	True	Hypothalamus	Nervous System	Brahman	Female
SAMEA104618899	Bos indicus	PAIRED	Unknown	12 months	Female	ILLUMINA	Illumina HiSeq 2000	Left ovary	Ovary	Female Reproductive System	True	Ovary	Female Reproductive System	Brahman	Female
SAMEA104618900	Bos indicus	PAIRED	Unknown	12 months	Female	ILLUMINA	Illumina HiSeq 2000	liver	Liver	Liver	True	Liver	Liver	Brahman	Female
SAMEA104618901	Bos indicus	PAIRED	Unknown	12 months	Female	ILLUMINA	Illumina HiSeq 2000	Uterus	Uterus	Female Reproductive System	True	Uterus	Female Reproductive System	Brahman	Female
SAMEA104618906	Bos indicus	PAIRED	Unknown	12 months	Female	ILLUMINA	Illumina HiSeq 2000	liver	Liver	Liver	True	Liver	Liver	Brahman	Female
SAMEA104618907	Bos indicus	PAIRED	Unknown	12 months	Female	ILLUMINA	Illumina HiSeq 2000	Uterus	Uterus	Female Reproductive System	True	Uterus	Female Reproductive System	Brahman	Female
SAMEA104618910	Bos indicus	PAIRED	Unknown	12 months	Female	ILLUMINA	Illumina HiSeq 2000	Pituitary gland	Pituitary	Nervous System	True	Pituitary	Nervous System	Brahman	Female
SAMEA104618911	Bos indicus	PAIRED	Unknown	12 months	Female	ILLUMINA	Illumina HiSeq 2000	Pituitary gland	Pituitary	Nervous System	True	Pituitary	Nervous System	Brahman	Female
SAMEA104618913	Bos indicus	PAIRED	Unknown	12 months	Female	ILLUMINA	Illumina HiSeq 2000	Pituitary gland	Pituitary	Nervous System	True	Pituitary	Nervous System	Brahman	Female
SAMEA104618915	Bos indicus	PAIRED	Unknown	12 months	Female	ILLUMINA	Illumina HiSeq 2000	Uterus	Uterus	Female Reproductive System	True	Uterus	Female Reproductive System	Nelore	Female
SAMEA104618916	Bos indicus	PAIRED	Unknown	12 months	Female	ILLUMINA	Illumina HiSeq 2000	Pituitary gland	Pituitary	Nervous System	True	Pituitary	Nervous System	Brahman	Female
SAMEA104618918	Bos indicus	PAIRED	Unknown	12 months	Female	ILLUMINA	Illumina HiSeq 2000	Pituitary gland	Pituitary	Nervous System	True	Pituitary	Nervous System	Brahman	Female
SAMEA104618919	Bos indicus	PAIRED	Unknown	12 months	Female	ILLUMINA	Illumina HiSeq 2000	Uterus	Uterus	Female Reproductive System	True	Uterus	Female Reproductive System	Brahman	Female
SAMEA104618921	Bos indicus	PAIRED	Unknown	12 months	Female	ILLUMINA	Illumina HiSeq 2000	Uterus	Uterus	Female Reproductive System	True	Uterus	Female Reproductive System	Brahman	Female
SAMEA104618923	Bos indicus	PAIRED	Unknown	12 months	Female	ILLUMINA	Illumina HiSeq 2000	Uterus	Uterus	Female Reproductive System	True	Uterus	Female Reproductive System	Brahman	Female
SAMEA104618924	Bos indicus	PAIRED	Unknown	12 months	Female	ILLUMINA	Illumina HiSeq 2000	Right ovary	Ovary	Female Reproductive System	True	Ovary	Female Reproductive System	Brahman	Female
SAMEA104618931	Bos indicus	PAIRED	Unknown	12 months	Female	ILLUMINA	Illumina HiSeq 2000	Left ovary	Ovary	Female Reproductive System	True	Ovary	Female Reproductive System	Brahman	Female
SAMEA104618932	Bos indicus	PAIRED	Unknown	12 months	Female	ILLUMINA	Illumina HiSeq 2000	Uterus	Uterus	Female Reproductive System	True	Uterus	Female Reproductive System	Brahman	Female
SAMEA104618935	Bos indicus	PAIRED	Unknown	12 months	Female	ILLUMINA	Illumina HiSeq 2000	Pituitary gland	Pituitary	Nervous System	True	Pituitary	Nervous System	Brahman	Female
SAMEA104618936	Bos indicus	PAIRED	Unknown	12 months	Female	ILLUMINA	Illumina HiSeq 2000	Uterus	Uterus	Female Reproductive System	True	Uterus	Female Reproductive System	Brahman	Female
SAMEA104618939	Bos indicus	PAIRED	Unknown	12 months	Female	ILLUMINA	Illumina HiSeq 2000	Uterus	Uterus	Female Reproductive System	True	Uterus	Female Reproductive System	Brahman	Female
SAMEA104618940	Bos indicus	PAIRED	Unknown	12 months	Female	ILLUMINA	Illumina HiSeq 2000	Pituitary gland	Pituitary	Nervous System	True	Pituitary	Nervous System	Brahman	Female
SAMEA104618943	Bos indicus	PAIRED	Unknown	12 months	Female	ILLUMINA	Illumina HiSeq 2000	Right ovary	Ovary	Female Reproductive System	True	Ovary	Female Reproductive System	Brahman	Female
SAMEA104618946	Bos indicus	PAIRED	Unknown	12 months	Female	ILLUMINA	Illumina HiSeq 2000	Pituitary gland	Pituitary	Nervous System	True	Pituitary	Nervous System	Brahman	Female
SAMEA104618947	Bos indicus	PAIRED	Unknown	12 months	Female	ILLUMINA	Illumina HiSeq 2000	Uterus	Uterus	Female Reproductive System	True	Uterus	Female Reproductive System	Brahman	Female
SAMEA104618948	Bos indicus	PAIRED	Unknown	12 months	Female	ILLUMINA	Illumina HiSeq 2000	Right ovary	Ovary	Female Reproductive System	True	Ovary	Female Reproductive System	Brahman	Female
SAMEA104618950	Bos indicus	PAIRED	Unknown	12 months	Female	ILLUMINA	Illumina HiSeq 2000	Pituitary gland	Pituitary	Nervous System	True	Pituitary	Nervous System	Brahman	Female
SAMEA104618951	Bos indicus	PAIRED	Unknown	12 months	Female	ILLUMINA	Illumina HiSeq 2000	Right ovary	Ovary	Female Reproductive System	True	Ovary	Female Reproductive System	Nelore	Female
SAMEA104618954	Bos indicus	PAIRED	Unknown	12 months	Female	ILLUMINA	Illumina HiSeq 2000	Left ovary	Ovary	Female Reproductive System	True	Ovary	Female Reproductive System	Nelore	Female
SAMEA104618955	Bos indicus	PAIRED	Unknown	12 months	Female	ILLUMINA	Illumina HiSeq 2000	Right ovary	Ovary	Female Reproductive System	True	Ovary	Female Reproductive System	Brahman	Female
SAMEA104618956	Bos indicus	PAIRED	Unknown	12 months	Female	ILLUMINA	Illumina HiSeq 2000	Pituitary gland	Pituitary	Nervous System	True	Pituitary	Nervous System	Brahman	Female
SAMEA104618958	Bos indicus	PAIRED	Unknown	12 months	Female	ILLUMINA	Illumina HiSeq 2000	Uterus	Uterus	Female Reproductive System	True	Uterus	Female Reproductive System	Brahman	Female
SAMEA104618959	Bos indicus	PAIRED	Unknown	12 months	Female	ILLUMINA	Illumina HiSeq 2000	Hypothalamus	Hypothalamus	Nervous System	True	Hypothalamus	Nervous System	Brahman	Female
SAMEA104626814	Bos taurus	PAIRED	Unknown	2 years	Unknown	ILLUMINA	Illumina HiSeq 3000	Blood	Blood	Immune System	True	Blood	Immune System	Holstein	Female
SAMEA104626815	Bos taurus	PAIRED	Unknown	2 years	Unknown	ILLUMINA	Illumina HiSeq 3000	Blood	Blood	Immune System	True	Blood	Immune System	Holstein	Female
SAMEA104626818	Bos taurus	PAIRED	Unknown	2 years	Unknown	ILLUMINA	Illumina HiSeq 3000	Blood	Blood	Immune System	True	Blood	Immune System	Swedish Red	Female
SAMEA104626822	Bos taurus	PAIRED	Unknown	2 years	Unknown	ILLUMINA	Illumina HiSeq 3000	Blood	Blood	Immune System	True	Blood	Immune System	Holstein	Female
SAMEA104626823	Bos taurus	PAIRED	Unknown	2 years	Unknown	ILLUMINA	Illumina HiSeq 3000	Blood	Blood	Immune System	True	Blood	Immune System	Holstein	Female
SAMEA104626826	Bos taurus	PAIRED	Unknown	2 years	Unknown	ILLUMINA	Illumina HiSeq 3000	Blood	Blood	Immune System	True	Blood	Immune System	Holstein	Female
SAMEA104626827	Bos taurus	PAIRED	Unknown	2 years	Unknown	ILLUMINA	Illumina HiSeq 3000	Blood	Blood	Immune System	True	Blood	Immune System	Holstein	Female
SAMEA104626832	Bos taurus	PAIRED	Unknown	2 years	Unknown	ILLUMINA	Illumina HiSeq 3000	Blood	Blood	Immune System	True	Blood	Immune System	Holstein	Female
SAMEA104626833	Bos taurus	PAIRED	Unknown	2 years	Unknown	ILLUMINA	Illumina HiSeq 3000	Blood	Blood	Immune System	True	Blood	Immune System	Holstein	Female
SAMEA104626834	Bos taurus	PAIRED	Unknown	2 years	Unknown	ILLUMINA	Illumina HiSeq 3000	Blood	Blood	Immune System	True	Blood	Immune System	Holstein	Female
SAMEA104626839	Bos taurus	PAIRED	Unknown	2 years	Unknown	ILLUMINA	Illumina HiSeq 3000	Blood	Blood	Immune System	True	Blood	Immune System	Aussie Red	Female
SAMEA104626840	Bos taurus	PAIRED	Unknown	2 years	Unknown	ILLUMINA	Illumina HiSeq 3000	Blood	Blood	Immune System	True	Blood	Immune System	Holstein	Female
SAMEA104626844	Bos taurus	PAIRED	Unknown	2 years	Unknown	ILLUMINA	Illumina HiSeq 3000	Blood	Blood	Immune System	True	Blood	Immune System	Holstein	Female
SAMEA104626845	Bos taurus	PAIRED	Unknown	2 years	Unknown	ILLUMINA	Illumina HiSeq 3000	Blood	Blood	Immune System	True	Blood	Immune System	Holstein	Female
SAMEA104626846	Bos taurus	PAIRED	Unknown	2 years	Unknown	ILLUMINA	Illumina HiSeq 3000	Blood	Blood	Immune System	True	Blood	Immune System	Holstein	Female
SAMEA104626850	Bos taurus	PAIRED	Unknown	2 years	Unknown	ILLUMINA	Illumina HiSeq 3000	Blood	Blood	Immune System	True	Blood	Immune System	Holstein	Female
SAMEA104626852	Bos taurus	PAIRED	Unknown	2 years	Unknown	ILLUMINA	Illumina HiSeq 3000	Blood	Blood	Immune System	True	Blood	Immune System	Holstein	Female
SAMEA104626853	Bos taurus	PAIRED	Unknown	2 years	Unknown	ILLUMINA	Illumina HiSeq 3000	Blood	Blood	Immune System	True	Blood	Immune System	Holstein	Female
SAMEA104626857	Bos taurus	PAIRED	Unknown	2 years	Unknown	ILLUMINA	Illumina HiSeq 3000	Blood	Blood	Immune System	True	Blood	Immune System	Holstein	Female
SAMEA104626860	Bos taurus	PAIRED	Unknown	2 years	Unknown	ILLUMINA	Illumina HiSeq 3000	Blood	Blood	Immune System	True	Blood	Immune System	Holstein	Female
SAMEA104626863	Bos taurus	PAIRED	Unknown	2 years	Unknown	ILLUMINA	Illumina HiSeq 3000	Blood	Blood	Immune System	True	Blood	Immune System	Holstein	Female
SAMEA104626865	Bos taurus	PAIRED	Unknown	2 years	Unknown	ILLUMINA	Illumina HiSeq 3000	Blood	Blood	Immune System	True	Blood	Immune System	Holstein	Female
SAMEA104626866	Bos taurus	PAIRED	Unknown	2 years	Unknown	ILLUMINA	Illumina HiSeq 3000	Blood	Blood	Immune System	True	Blood	Immune System	Holstein	Female
SAMEA104626867	Bos taurus	PAIRED	Unknown	2 years	Unknown	ILLUMINA	Illumina HiSeq 3000	Blood	Blood	Immune System	True	Blood	Immune System	Holstein	Female
SAMEA104626868	Bos taurus	PAIRED	Unknown	2 years	Unknown	ILLUMINA	Illumina HiSeq 3000	Blood	Blood	Immune System	True	Blood	Immune System	Holstein	Female
SAMEA104626869	Bos taurus	PAIRED	Unknown	2 years	Unknown	ILLUMINA	Illumina HiSeq 3000	Blood	Blood	Immune System	True	Blood	Immune System	Holstein	Female
SAMEA104626874	Bos taurus	PAIRED	Unknown	2 years	Unknown	ILLUMINA	Illumina HiSeq 3000	Blood	Blood	Immune System	True	Blood	Immune System	Holstein	Female
SAMEA104626878	Bos taurus	PAIRED	Unknown	2 years	Unknown	ILLUMINA	Illumina HiSeq 3000	Blood	Blood	Immune System	True	Blood	Immune System	Holstein	Female
SAMEA104626879	Bos taurus	PAIRED	Unknown	2 years	Unknown	ILLUMINA	Illumina HiSeq 3000	Blood	Blood	Immune System	True	Blood	Immune System	Holstein	Female
SAMEA104626882	Bos taurus	PAIRED	Unknown	2 years	Unknown	ILLUMINA	Illumina HiSeq 3000	Blood	Blood	Immune System	True	Blood	Immune System	Holstein	Female
SAMEA104626884	Bos taurus	PAIRED	Unknown	2 years	Unknown	ILLUMINA	Illumina HiSeq 3000	Blood	Blood	Immune System	True	Blood	Immune System	Holstein	Female
SAMEA104626888	Bos taurus	PAIRED	Unknown	2 years	Unknown	ILLUMINA	Illumina HiSeq 3000	Blood	Blood	Immune System	True	Blood	Immune System	Aussie Red	Female
SAMEA104626889	Bos taurus	PAIRED	Unknown	2 years	Unknown	ILLUMINA	Illumina HiSeq 3000	Blood	Blood	Immune System	True	Blood	Immune System	Holstein	Female
SAMEA104626890	Bos taurus	PAIRED	Unknown	2 years	Unknown	ILLUMINA	Illumina HiSeq 3000	Blood	Blood	Immune System	True	Blood	Immune System	Holstein	Female
SAMEA104626893	Bos taurus	PAIRED	Unknown	2 years	Unknown	ILLUMINA	Illumina HiSeq 3000	Blood	Blood	Immune System	True	Blood	Immune System	Holstein	Female
SAMEA104626895	Bos taurus	PAIRED	Unknown	2 years	Unknown	ILLUMINA	Illumina HiSeq 3000	Blood	Blood	Immune System	True	Blood	Immune System	Holstein	Female
SAMEA1088313	Bos taurus	PAIRED	Unknown	Unknown	Unknown	ILLUMINA	Illumina HiSeq 3000	Cd8-Positive	Leukocyte	Immune System	True	Leukocyte	Immune System	Holstein	Female
SAMEA1088317	Bos taurus	PAIRED	Unknown	Unknown	Unknown	ILLUMINA	Illumina HiSeq 3000	Cd4-Positive Helper T Cell	Leukocyte	Immune System	True	Leukocyte	Immune System	Holstein	Female
SAMEA1088318	Bos taurus	PAIRED	Unknown	Unknown	Unknown	ILLUMINA	Illumina HiSeq 3000	Cd8-Positive	Leukocyte	Immune System	True	Leukocyte	Immune System	Holstein	Female
SAMEA1088339	Bos taurus	PAIRED	Unknown	Unknown	Unknown	ILLUMINA	Illumina HiSeq 3000	Cd4-Positive Helper T Cell	Leukocyte	Immune System	True	Leukocyte	Immune System	Holstein	Female
SAMEA1088354	Bos taurus	PAIRED	Unknown	Unknown	Unknown	ILLUMINA	Illumina HiSeq 3000	Cd4-Positive Helper T Cell	Leukocyte	Immune System	True	Leukocyte	Immune System	Holstein	Male
SAMEA110328993	Bos taurus	SINGLE	Unknown	Unknown	Unknown	ILLUMINA	Illumina HiSeq 4000	Respiratory Epithelial Cell	Lung	Respiratory System	True	Lung	Respiratory System	Holstein	Female
SAMEA110328994	Bos taurus	SINGLE	Unknown	Unknown	Unknown	ILLUMINA	Illumina HiSeq 4000	Respiratory Epithelial Cell	Lung	Respiratory System	Low_quality	Lung	Respiratory System	Unknown	Unknown
SAMEA110328995	Bos taurus	SINGLE	Unknown	Unknown	Unknown	ILLUMINA	Illumina HiSeq 4000	Respiratory Epithelial Cell	Lung	Respiratory System	Low_quality	Lung	Respiratory System	Unknown	Unknown
SAMEA110328996	Bos taurus	SINGLE	Unknown	Unknown	Unknown	ILLUMINA	Illumina HiSeq 4000	Respiratory Epithelial Cell	Lung	Respiratory System	Low_quality	Lung	Respiratory System	Unknown	Unknown
SAMEA110328997	Bos taurus	SINGLE	Unknown	Unknown	Unknown	ILLUMINA	Illumina HiSeq 4000	Respiratory Epithelial Cell	Lung	Respiratory System	Low_quality	Lung	Respiratory System	Unknown	Unknown
SAMEA110328998	Bos taurus	SINGLE	Unknown	Unknown	Unknown	ILLUMINA	Illumina HiSeq 4000	Respiratory Epithelial Cell	Lung	Respiratory System	Low_quality	Lung	Respiratory System	Unknown	Unknown
SAMEA110328999	Bos taurus	SINGLE	Unknown	Unknown	Unknown	ILLUMINA	Illumina HiSeq 4000	Respiratory Epithelial Cell	Lung	Respiratory System	Low_quality	Lung	Respiratory System	Unknown	Unknown
SAMEA110329000	Bos taurus	SINGLE	Unknown	Unknown	Unknown	ILLUMINA	Illumina HiSeq 4000	Respiratory Epithelial Cell	Lung	Respiratory System	Low_quality	Lung	Respiratory System	Unknown	Unknown
SAMEA110329001	Bos taurus	SINGLE	Unknown	Unknown	Unknown	ILLUMINA	Illumina HiSeq 4000	Respiratory Epithelial Cell	Lung	Respiratory System	Low_quality	Lung	Respiratory System	Unknown	Unknown
SAMEA110329002	Bos taurus	SINGLE	Unknown	Unknown	Unknown	ILLUMINA	Illumina HiSeq 4000	Respiratory Epithelial Cell	Lung	Respiratory System	Low_quality	Lung	Respiratory System	Unknown	Unknown
SAMEA110329003	Bos taurus	SINGLE	Unknown	Unknown	Unknown	ILLUMINA	Illumina HiSeq 4000	Respiratory Epithelial Cell	Lung	Respiratory System	Low_quality	Lung	Respiratory System	Unknown	Unknown
SAMEA110329004	Bos taurus	SINGLE	Unknown	Unknown	Unknown	ILLUMINA	Illumina HiSeq 4000	Respiratory Epithelial Cell	Lung	Respiratory System	Low_quality	Lung	Respiratory System	Unknown	Unknown
SAMEA110329005	Bos taurus	SINGLE	Unknown	Unknown	Unknown	ILLUMINA	Illumina HiSeq 4000	Respiratory Epithelial Cell	Lung	Respiratory System	Low_quality	Lung	Respiratory System	Unknown	Unknown
SAMEA110329006	Bos taurus	SINGLE	Unknown	Unknown	Unknown	ILLUMINA	Illumina HiSeq 4000	Respiratory Epithelial Cell	Lung	Respiratory System	True	Lung	Respiratory System	Holstein	Male
SAMEA110329007	Bos taurus	SINGLE	Unknown	Unknown	Unknown	ILLUMINA	Illumina HiSeq 4000	Respiratory Epithelial Cell	Lung	Respiratory System	Low_quality	Lung	Respiratory System	Unknown	Unknown
SAMEA110329008	Bos taurus	SINGLE	Unknown	Unknown	Unknown	ILLUMINA	Illumina HiSeq 4000	Respiratory Epithelial Cell	Lung	Respiratory System	Low_quality	Lung	Respiratory System	Unknown	Unknown
SAMEA110329009	Bos taurus	SINGLE	Unknown	Unknown	Unknown	ILLUMINA	Illumina HiSeq 4000	Respiratory Epithelial Cell	Lung	Respiratory System	Low_quality	Lung	Respiratory System	Unknown	Unknown
SAMEA110329010	Bos taurus	SINGLE	Unknown	Unknown	Unknown	ILLUMINA	Illumina HiSeq 4000	Respiratory Epithelial Cell	Lung	Respiratory System	Low_quality	Lung	Respiratory System	Unknown	Unknown
SAMEA110329011	Bos taurus	SINGLE	Unknown	Unknown	Unknown	ILLUMINA	Illumina HiSeq 4000	Respiratory Epithelial Cell	Lung	Respiratory System	Low_quality	Lung	Respiratory System	Unknown	Unknown
SAMEA110329012	Bos taurus	SINGLE	Unknown	Unknown	Unknown	ILLUMINA	Illumina HiSeq 4000	Respiratory Epithelial Cell	Lung	Respiratory System	Low_quality	Lung	Respiratory System	Unknown	Unknown
SAMEA110329013	Bos taurus	SINGLE	Unknown	Unknown	Unknown	ILLUMINA	Illumina HiSeq 4000	Respiratory Epithelial Cell	Lung	Respiratory System	Low_quality	Lung	Respiratory System	Unknown	Unknown
SAMEA110329014	Bos taurus	SINGLE	Unknown	Unknown	Unknown	ILLUMINA	Illumina HiSeq 4000	Respiratory Epithelial Cell	Lung	Respiratory System	Low_quality	Lung	Respiratory System	Unknown	Unknown
SAMEA110329015	Bos taurus	SINGLE	Unknown	Unknown	Unknown	ILLUMINA	Illumina HiSeq 4000	Respiratory Epithelial Cell	Lung	Respiratory System	Low_quality	Lung	Respiratory System	Unknown	Unknown
SAMEA110329016	Bos taurus	SINGLE	Unknown	Unknown	Unknown	ILLUMINA	Illumina HiSeq 4000	Respiratory Epithelial Cell	Lung	Respiratory System	Low_quality	Lung	Respiratory System	Unknown	Unknown
SAMEA110329017	Bos taurus	SINGLE	Unknown	Unknown	Unknown	ILLUMINA	Illumina HiSeq 4000	Respiratory Epithelial Cell	Lung	Respiratory System	True	Lung	Respiratory System	Simmental	Male
SAMEA110329018	Bos taurus	SINGLE	Unknown	Unknown	Unknown	ILLUMINA	Illumina HiSeq 4000	Respiratory Epithelial Cell	Lung	Respiratory System	True	Lung	Respiratory System	Simmental	Male
SAMEA110329019	Bos taurus	SINGLE	Unknown	Unknown	Unknown	ILLUMINA	Illumina HiSeq 4000	Respiratory Epithelial Cell	Lung	Respiratory System	True	Lung	Respiratory System	Simmental	Male
SAMEA110329020	Bos taurus	SINGLE	Unknown	Unknown	Unknown	ILLUMINA	Illumina HiSeq 4000	Respiratory Epithelial Cell	Lung	Respiratory System	True	Lung	Respiratory System	Simmental	Male
SAMEA110329021	Bos taurus	SINGLE	Unknown	Unknown	Unknown	ILLUMINA	Illumina HiSeq 4000	Respiratory Epithelial Cell	Lung	Respiratory System	True	Lung	Respiratory System	Simmental	Male
SAMEA110329022	Bos taurus	SINGLE	Unknown	Unknown	Unknown	ILLUMINA	Illumina HiSeq 4000	Respiratory Epithelial Cell	Lung	Respiratory System	True	Lung	Respiratory System	Simmental	Female
SAMEA110329023	Bos taurus	SINGLE	Unknown	Unknown	Unknown	ILLUMINA	Illumina HiSeq 4000	Respiratory Epithelial Cell	Lung	Respiratory System	Low_quality	Lung	Respiratory System	Unknown	Unknown
SAMEA110329024	Bos taurus	SINGLE	Unknown	Unknown	Unknown	ILLUMINA	Illumina HiSeq 4000	Respiratory Epithelial Cell	Lung	Respiratory System	True	Lung	Respiratory System	Simmental	Male
SAMEA110329025	Bos taurus	SINGLE	Unknown	Unknown	Unknown	ILLUMINA	Illumina HiSeq 4000	Respiratory Epithelial Cell	Lung	Respiratory System	True	Lung	Respiratory System	Simmental	Male
SAMEA110329026	Bos taurus	SINGLE	Unknown	Unknown	Unknown	ILLUMINA	Illumina HiSeq 4000	Respiratory Epithelial Cell	Lung	Respiratory System	True	Lung	Respiratory System	Simmental	Female
SAMEA110329027	Bos taurus	SINGLE	Unknown	Unknown	Unknown	ILLUMINA	Illumina HiSeq 4000	Respiratory Epithelial Cell	Lung	Respiratory System	Low_quality	Lung	Respiratory System	Unknown	Unknown
SAMEA110329028	Bos taurus	SINGLE	Unknown	Unknown	Unknown	ILLUMINA	Illumina HiSeq 4000	Respiratory Epithelial Cell	Lung	Respiratory System	True	Lung	Respiratory System	Simmental	Male
SAMEA110329029	Bos taurus	SINGLE	Unknown	Unknown	Unknown	ILLUMINA	Illumina HiSeq 4000	Respiratory Epithelial Cell	Lung	Respiratory System	True	Lung	Respiratory System	Simmental	Female
SAMEA110329030	Bos taurus	SINGLE	Unknown	Unknown	Unknown	ILLUMINA	Illumina HiSeq 4000	Respiratory Epithelial Cell	Lung	Respiratory System	True	Lung	Respiratory System	Simmental	Male
SAMEA110329031	Bos taurus	SINGLE	Unknown	Unknown	Unknown	ILLUMINA	Illumina HiSeq 4000	Respiratory Epithelial Cell	Lung	Respiratory System	True	Lung	Respiratory System	Simmental	Male
SAMEA110329032	Bos taurus	SINGLE	Unknown	Unknown	Unknown	ILLUMINA	Illumina HiSeq 4000	Respiratory Epithelial Cell	Lung	Respiratory System	Low_quality	Lung	Respiratory System	Unknown	Unknown
SAMEA110329033	Bos taurus	SINGLE	Unknown	Unknown	Unknown	ILLUMINA	Illumina HiSeq 4000	Respiratory Epithelial Cell	Lung	Respiratory System	True	Lung	Respiratory System	Simmental	Male
SAMEA110329034	Bos taurus	SINGLE	Unknown	Unknown	Unknown	ILLUMINA	Illumina HiSeq 4000	Respiratory Epithelial Cell	Lung	Respiratory System	Low_quality	Lung	Respiratory System	Unknown	Unknown
SAMEA110329035	Bos taurus	SINGLE	Unknown	Unknown	Unknown	ILLUMINA	Illumina HiSeq 4000	Respiratory Epithelial Cell	Lung	Respiratory System	True	Lung	Respiratory System	Simmental	Male
SAMEA110329036	Bos taurus	SINGLE	Unknown	Unknown	Unknown	ILLUMINA	Illumina HiSeq 4000	Respiratory Epithelial Cell	Lung	Respiratory System	Low_quality	Lung	Respiratory System	Unknown	Unknown
SAMEA110329037	Bos taurus	SINGLE	Unknown	Unknown	Unknown	ILLUMINA	Illumina HiSeq 4000	Respiratory Epithelial Cell	Lung	Respiratory System	True	Lung	Respiratory System	Simmental	Female
SAMEA110329038	Bos taurus	SINGLE	Unknown	Unknown	Unknown	ILLUMINA	Illumina HiSeq 4000	Respiratory Epithelial Cell	Lung	Respiratory System	Low_quality	Lung	Respiratory System	Unknown	Unknown
SAMEA110329039	Bos taurus	SINGLE	Unknown	Unknown	Unknown	ILLUMINA	Illumina HiSeq 4000	Respiratory Epithelial Cell	Lung	Respiratory System	Low_quality	Lung	Respiratory System	Unknown	Unknown
SAMEA110329040	Bos taurus	SINGLE	Unknown	Unknown	Unknown	ILLUMINA	Illumina HiSeq 4000	Respiratory Epithelial Cell	Lung	Respiratory System	Low_quality	Lung	Respiratory System	Unknown	Unknown
SAMEA110329041	Bos taurus	SINGLE	Unknown	Unknown	Unknown	ILLUMINA	Illumina HiSeq 4000	Respiratory Epithelial Cell	Lung	Respiratory System	True	Lung	Respiratory System	Holstein	Male
SAMEA110329042	Bos taurus	SINGLE	Unknown	Unknown	Unknown	ILLUMINA	Illumina HiSeq 4000	Respiratory Epithelial Cell	Lung	Respiratory System	True	Lung	Respiratory System	Holstein	Male
SAMEA110329043	Bos taurus	SINGLE	Unknown	Unknown	Unknown	ILLUMINA	Illumina HiSeq 4000	Respiratory Epithelial Cell	Lung	Respiratory System	Low_quality	Lung	Respiratory System	Unknown	Unknown
SAMEA110329044	Bos taurus	SINGLE	Unknown	Unknown	Unknown	ILLUMINA	Illumina HiSeq 4000	Respiratory Epithelial Cell	Lung	Respiratory System	Low_quality	Lung	Respiratory System	Unknown	Unknown
SAMEA110329045	Bos taurus	SINGLE	Unknown	Unknown	Unknown	ILLUMINA	Illumina HiSeq 4000	Respiratory Epithelial Cell	Lung	Respiratory System	True	Lung	Respiratory System	Holstein	Male
SAMEA110329046	Bos taurus	SINGLE	Unknown	Unknown	Unknown	ILLUMINA	Illumina HiSeq 4000	Respiratory Epithelial Cell	Lung	Respiratory System	Low_quality	Lung	Respiratory System	Unknown	Unknown
SAMEA110329047	Bos taurus	SINGLE	Unknown	Unknown	Unknown	ILLUMINA	Illumina HiSeq 4000	Respiratory Epithelial Cell	Lung	Respiratory System	Low_quality	Lung	Respiratory System	Unknown	Unknown
SAMEA110329048	Bos taurus	SINGLE	Unknown	Unknown	Unknown	ILLUMINA	Illumina HiSeq 4000	Respiratory Epithelial Cell	Lung	Respiratory System	Low_quality	Lung	Respiratory System	Unknown	Unknown
SAMEA110329049	Bos taurus	SINGLE	Unknown	Unknown	Unknown	ILLUMINA	Illumina HiSeq 4000	Respiratory Epithelial Cell	Lung	Respiratory System	True	Lung	Respiratory System	Holstein	Male
SAMEA110329050	Bos taurus	SINGLE	Unknown	Unknown	Unknown	ILLUMINA	Illumina HiSeq 4000	Respiratory Epithelial Cell	Lung	Respiratory System	Low_quality	Lung	Respiratory System	Unknown	Unknown
SAMEA110329051	Bos taurus	SINGLE	Unknown	Unknown	Unknown	ILLUMINA	Illumina HiSeq 4000	Respiratory Epithelial Cell	Lung	Respiratory System	Low_quality	Lung	Respiratory System	Unknown	Unknown
SAMEA110329052	Bos taurus	SINGLE	Unknown	Unknown	Unknown	ILLUMINA	Illumina HiSeq 4000	Respiratory Epithelial Cell	Lung	Respiratory System	Low_quality	Lung	Respiratory System	Unknown	Unknown
SAMEA110329053	Bos taurus	SINGLE	Unknown	Unknown	Unknown	ILLUMINA	Illumina HiSeq 4000	Respiratory Epithelial Cell	Lung	Respiratory System	Low_quality	Lung	Respiratory System	Unknown	Unknown
SAMEA110329054	Bos taurus	SINGLE	Unknown	Unknown	Unknown	ILLUMINA	Illumina HiSeq 4000	Respiratory Epithelial Cell	Lung	Respiratory System	Low_quality	Lung	Respiratory System	Unknown	Unknown
SAMEA110329055	Bos taurus	SINGLE	Unknown	Unknown	Unknown	ILLUMINA	Illumina HiSeq 4000	Respiratory Epithelial Cell	Lung	Respiratory System	Low_quality	Lung	Respiratory System	Unknown	Unknown
SAMEA110329056	Bos taurus	SINGLE	Unknown	Unknown	Unknown	ILLUMINA	Illumina HiSeq 4000	Respiratory Epithelial Cell	Lung	Respiratory System	Low_quality	Lung	Respiratory System	Unknown	Unknown
SAMEA110329057	Bos taurus	SINGLE	Unknown	Unknown	Unknown	ILLUMINA	Illumina HiSeq 4000	Respiratory Epithelial Cell	Lung	Respiratory System	Low_quality	Lung	Respiratory System	Unknown	Unknown
SAMEA110329058	Bos taurus	SINGLE	Unknown	Unknown	Unknown	ILLUMINA	Illumina HiSeq 4000	Respiratory Epithelial Cell	Lung	Respiratory System	Low_quality	Lung	Respiratory System	Unknown	Unknown
SAMEA110329059	Bos taurus	SINGLE	Unknown	Unknown	Unknown	ILLUMINA	Illumina HiSeq 4000	Respiratory Epithelial Cell	Lung	Respiratory System	True	Lung	Respiratory System	Holstein	Male
SAMEA110329060	Bos taurus	SINGLE	Unknown	Unknown	Unknown	ILLUMINA	Illumina HiSeq 4000	Respiratory Epithelial Cell	Lung	Respiratory System	Low_quality	Lung	Respiratory System	Unknown	Unknown
SAMEA110329061	Bos taurus	SINGLE	Unknown	Unknown	Unknown	ILLUMINA	Illumina HiSeq 4000	Respiratory Epithelial Cell	Lung	Respiratory System	Low_quality	Lung	Respiratory System	Unknown	Unknown
SAMEA110329062	Bos taurus	SINGLE	Unknown	Unknown	Unknown	ILLUMINA	Illumina HiSeq 4000	Respiratory Epithelial Cell	Lung	Respiratory System	Low_quality	Lung	Respiratory System	Unknown	Unknown
SAMEA110329063	Bos taurus	SINGLE	Unknown	Unknown	Unknown	ILLUMINA	Illumina HiSeq 4000	Respiratory Epithelial Cell	Lung	Respiratory System	Low_quality	Lung	Respiratory System	Unknown	Unknown
SAMEA110329064	Bos taurus	SINGLE	Unknown	Unknown	Unknown	ILLUMINA	Illumina HiSeq 4000	Respiratory Epithelial Cell	Lung	Respiratory System	Low_quality	Lung	Respiratory System	Unknown	Unknown
SAMEA111328912	Bos taurus	PAIRED	Unknown	Unknown	Male	ILLUMINA	Illumina NovaSeq 6000	Testis	Testis	Male Reproductive System	True	Testis	Male Reproductive System	Brown Swiss	Male
SAMEA111328913	Bos taurus	PAIRED	Unknown	Unknown	Male	ILLUMINA	Illumina NovaSeq 6000	Testis	Testis	Male Reproductive System	True	Testis	Male Reproductive System	Brown Swiss	Male
SAMEA111328914	Bos taurus	PAIRED	Unknown	Unknown	Male	ILLUMINA	Illumina NovaSeq 6000	Testis	Testis	Male Reproductive System	True	Testis	Male Reproductive System	Brown Swiss	Male
SAMEA111328915	Bos taurus	PAIRED	Unknown	Unknown	Male	ILLUMINA	Illumina NovaSeq 6000	Testis	Testis	Male Reproductive System	True	Testis	Male Reproductive System	Original Braunvieh	Male
SAMEA111328916	Bos taurus	PAIRED	Unknown	Unknown	Male	ILLUMINA	Illumina NovaSeq 6000	Testis	Testis	Male Reproductive System	True	Testis	Male Reproductive System	Original Braunvieh	Male
SAMEA111328917	Bos taurus	PAIRED	Unknown	Unknown	Male	ILLUMINA	Illumina NovaSeq 6000	Testis	Testis	Male Reproductive System	True	Testis	Male Reproductive System	Brown Swiss	Male
SAMEA111328918	Bos taurus	PAIRED	Unknown	Unknown	Male	ILLUMINA	Illumina NovaSeq 6000	Testis	Testis	Male Reproductive System	True	Testis	Male Reproductive System	Original Braunvieh	Male
SAMEA111328919	Bos taurus	PAIRED	Unknown	Unknown	Male	ILLUMINA	Illumina NovaSeq 6000	Testis	Testis	Male Reproductive System	True	Testis	Male Reproductive System	Brown Swiss	Male
SAMEA111328920	Bos taurus	PAIRED	Unknown	Unknown	Male	ILLUMINA	Illumina NovaSeq 6000	Testis	Testis	Male Reproductive System	True	Testis	Male Reproductive System	Original Braunvieh	Male
SAMEA111328921	Bos taurus	PAIRED	Unknown	Unknown	Male	ILLUMINA	Illumina NovaSeq 6000	Testis	Testis	Male Reproductive System	True	Testis	Male Reproductive System	Original Braunvieh	Male
SAMEA111328922	Bos taurus	PAIRED	Unknown	Unknown	Male	ILLUMINA	Illumina NovaSeq 6000	Testis	Testis	Male Reproductive System	True	Testis	Male Reproductive System	Original Braunvieh	Male
SAMEA111328923	Bos taurus	PAIRED	Unknown	Unknown	Male	ILLUMINA	Illumina NovaSeq 6000	Testis	Testis	Male Reproductive System	True	Testis	Male Reproductive System	Brown Swiss	Male
SAMEA111328924	Bos taurus	PAIRED	Unknown	Unknown	Male	ILLUMINA	Illumina NovaSeq 6000	Testis	Testis	Male Reproductive System	True	Testis	Male Reproductive System	Brown Swiss	Male
SAMEA111328925	Bos taurus	PAIRED	Unknown	Unknown	Male	ILLUMINA	Illumina NovaSeq 6000	Testis	Testis	Male Reproductive System	True	Testis	Male Reproductive System	Original Braunvieh	Male
SAMEA111328926	Bos taurus	PAIRED	Unknown	Unknown	Male	ILLUMINA	Illumina NovaSeq 6000	Testis	Testis	Male Reproductive System	True	Testis	Male Reproductive System	Brown Swiss	Male
SAMEA111328927	Bos taurus	PAIRED	Unknown	Unknown	Male	ILLUMINA	Illumina NovaSeq 6000	Testis	Testis	Male Reproductive System	True	Testis	Male Reproductive System	Original Braunvieh	Male
SAMEA111328928	Bos taurus	PAIRED	Unknown	Unknown	Male	ILLUMINA	Illumina NovaSeq 6000	Testis	Testis	Male Reproductive System	True	Testis	Male Reproductive System	Original Braunvieh	Male
SAMEA111328929	Bos taurus	PAIRED	Unknown	Unknown	Male	ILLUMINA	Illumina NovaSeq 6000	Testis	Testis	Male Reproductive System	True	Testis	Male Reproductive System	Original Braunvieh	Male
SAMEA111328930	Bos taurus	PAIRED	Unknown	Unknown	Male	ILLUMINA	Illumina NovaSeq 6000	Testis	Testis	Male Reproductive System	True	Testis	Male Reproductive System	Brown Swiss	Male
SAMEA111328931	Bos taurus	PAIRED	Unknown	Unknown	Male	ILLUMINA	Illumina NovaSeq 6000	Testis	Testis	Male Reproductive System	True	Testis	Male Reproductive System	Original Braunvieh	Male
SAMEA111328932	Bos taurus	PAIRED	Unknown	Unknown	Male	ILLUMINA	Illumina NovaSeq 6000	Testis	Testis	Male Reproductive System	True	Testis	Male Reproductive System	Original Braunvieh	Male
SAMEA111328933	Bos taurus	PAIRED	Unknown	Unknown	Male	ILLUMINA	Illumina NovaSeq 6000	Testis	Testis	Male Reproductive System	True	Testis	Male Reproductive System	Brown Swiss	Male
SAMEA111328934	Bos taurus	PAIRED	Unknown	Unknown	Male	ILLUMINA	Illumina NovaSeq 6000	Testis	Testis	Male Reproductive System	True	Testis	Male Reproductive System	Brown Swiss	Male
SAMEA111328935	Bos taurus	PAIRED	Unknown	Unknown	Male	ILLUMINA	Illumina NovaSeq 6000	Testis	Testis	Male Reproductive System	True	Testis	Male Reproductive System	Brown Swiss	Male
SAMEA111328936	Bos taurus	PAIRED	Unknown	Unknown	Male	ILLUMINA	Illumina NovaSeq 6000	Testis	Testis	Male Reproductive System	True	Testis	Male Reproductive System	Brown Swiss	Male
SAMEA111328937	Bos taurus	PAIRED	Unknown	Unknown	Male	ILLUMINA	Illumina NovaSeq 6000	Testis	Testis	Male Reproductive System	True	Testis	Male Reproductive System	Brown Swiss	Male
SAMEA111328938	Bos taurus	PAIRED	Unknown	Unknown	Male	ILLUMINA	Illumina NovaSeq 6000	Testis	Testis	Male Reproductive System	True	Testis	Male Reproductive System	Original Braunvieh	Male
SAMEA111328939	Bos taurus	PAIRED	Unknown	Unknown	Male	ILLUMINA	Illumina NovaSeq 6000	Testis	Testis	Male Reproductive System	True	Testis	Male Reproductive System	Brown Swiss	Male
SAMEA111328940	Bos taurus	PAIRED	Unknown	Unknown	Male	ILLUMINA	Illumina NovaSeq 6000	Testis	Testis	Male Reproductive System	True	Testis	Male Reproductive System	Brown Swiss	Male
SAMEA111328941	Bos taurus	PAIRED	Unknown	Unknown	Male	ILLUMINA	Illumina NovaSeq 6000	Testis	Testis	Male Reproductive System	True	Testis	Male Reproductive System	Original Braunvieh	Male
SAMEA111328942	Bos taurus	PAIRED	Unknown	Unknown	Male	ILLUMINA	Illumina NovaSeq 6000	Testis	Testis	Male Reproductive System	True	Testis	Male Reproductive System	Original Braunvieh	Male
SAMEA111328943	Bos taurus	PAIRED	Unknown	Unknown	Male	ILLUMINA	Illumina NovaSeq 6000	Testis	Testis	Male Reproductive System	True	Testis	Male Reproductive System	Original Braunvieh	Male
SAMEA112352657	Bos taurus	SINGLE	Holstein	6 months	Male	ILLUMINA	NextSeq 500	Blood	Blood	Immune System	True	Blood	Immune System	Holstein	Male
SAMEA112352658	Bos taurus	SINGLE	Holstein	6 months	Male	ILLUMINA	NextSeq 500	Blood	Blood	Immune System	True	Blood	Immune System	Holstein	Male
SAMEA112352659	Bos taurus	SINGLE	Holstein	6 months	Male	ILLUMINA	NextSeq 500	Blood	Blood	Immune System	True	Blood	Immune System	Holstein	Male
SAMEA112352660	Bos taurus	SINGLE	Holstein	6 months	Male	ILLUMINA	NextSeq 500	Blood	Blood	Immune System	True	Blood	Immune System	Holstein	Male
SAMEA112352661	Bos taurus	SINGLE	Holstein	6 months	Male	ILLUMINA	NextSeq 500	Blood	Blood	Immune System	True	Blood	Immune System	Holstein	Male
SAMEA112352662	Bos taurus	SINGLE	Holstein	6 months	Male	ILLUMINA	NextSeq 500	Blood	Blood	Immune System	True	Blood	Immune System	Holstein	Male
SAMEA112352663	Bos taurus	SINGLE	Holstein	6 months	Male	ILLUMINA	NextSeq 500	Blood	Blood	Immune System	True	Blood	Immune System	Holstein	Male
SAMEA112352664	Bos taurus	SINGLE	Holstein	6 months	Male	ILLUMINA	NextSeq 500	Blood	Blood	Immune System	True	Blood	Immune System	Holstein	Male
SAMEA112352665	Bos taurus	SINGLE	Holstein	6 months	Male	ILLUMINA	NextSeq 500	Blood	Blood	Immune System	True	Blood	Immune System	Holstein	Male
SAMEA112352666	Bos taurus	SINGLE	Holstein	6 months	Male	ILLUMINA	NextSeq 500	Blood	Blood	Immune System	True	Blood	Immune System	Holstein	Male
SAMEA112352667	Bos taurus	SINGLE	Holstein	6 months	Male	ILLUMINA	NextSeq 500	Blood	Blood	Immune System	True	Blood	Immune System	Holstein	Male
SAMEA112352668	Bos taurus	SINGLE	Holstein	6 months	Male	ILLUMINA	NextSeq 500	Blood	Blood	Immune System	True	Blood	Immune System	Holstein	Male
SAMEA112352669	Bos taurus	SINGLE	Holstein	6 months	Male	ILLUMINA	NextSeq 500	Blood	Blood	Immune System	True	Blood	Immune System	Holstein	Male
SAMEA112352670	Bos taurus	SINGLE	Holstein	6 months	Male	ILLUMINA	NextSeq 500	Blood	Blood	Immune System	True	Blood	Immune System	Holstein	Male
SAMEA112352671	Bos taurus	SINGLE	Holstein	6 months	Male	ILLUMINA	NextSeq 500	Blood	Blood	Immune System	True	Blood	Immune System	Holstein	Male
SAMEA112352672	Bos taurus	SINGLE	Holstein	6 months	Male	ILLUMINA	NextSeq 500	Blood	Blood	Immune System	True	Blood	Immune System	Holstein	Male
SAMEA112352673	Bos taurus	SINGLE	Holstein	6 months	Male	ILLUMINA	NextSeq 500	Blood	Blood	Immune System	True	Blood	Immune System	Holstein	Male
SAMEA112352674	Bos taurus	SINGLE	Holstein	6 months	Male	ILLUMINA	NextSeq 500	Blood	Blood	Immune System	True	Blood	Immune System	Holstein	Male
SAMEA112352675	Bos taurus	SINGLE	Holstein	6 months	Male	ILLUMINA	NextSeq 500	Blood	Blood	Immune System	True	Blood	Immune System	Holstein	Male
SAMEA112352676	Bos taurus	SINGLE	Holstein	6 months	Male	ILLUMINA	NextSeq 500	Blood	Blood	Immune System	True	Blood	Immune System	Holstein	Male
SAMEA112366767	Bos taurus	PAIRED	Parthenaise	Unknown	Female	ILLUMINA	Illumina NovaSeq 6000	Cerebellum	CNS	Nervous System	True	CNS	Nervous System	Parthenaise	Female
SAMEA112366768	Bos taurus	PAIRED	Parthenaise	Unknown	Female	ILLUMINA	Illumina NovaSeq 6000	Brain	CNS	Nervous System	True	CNS	Nervous System	Parthenaise	Female
SAMEA112366769	Bos taurus	PAIRED	Parthenaise	Unknown	Female	ILLUMINA	Illumina NovaSeq 6000	Cerebellum	CNS	Nervous System	True	CNS	Nervous System	Parthenaise	Female
SAMEA112366770	Bos taurus	PAIRED	Parthenaise	Unknown	Female	ILLUMINA	Illumina NovaSeq 6000	Brain	CNS	Nervous System	True	CNS	Nervous System	Parthenaise	Female
SAMEA112366771	Bos taurus	PAIRED	Parthenaise	Unknown	Female	ILLUMINA	Illumina NovaSeq 6000	Cerebellum	CNS	Nervous System	True	CNS	Nervous System	Parthenaise	Female
SAMEA112366772	Bos taurus	PAIRED	Parthenaise	Unknown	Female	ILLUMINA	Illumina NovaSeq 6000	Brain	CNS	Nervous System	True	CNS	Nervous System	Parthenaise	Female
SAMEA112366773	Bos taurus	PAIRED	Parthenaise	Unknown	Female	ILLUMINA	Illumina NovaSeq 6000	Cerebellum	CNS	Nervous System	True	CNS	Nervous System	Parthenaise	Female
SAMEA112366774	Bos taurus	PAIRED	Parthenaise	Unknown	Female	ILLUMINA	Illumina NovaSeq 6000	Brain	CNS	Nervous System	True	CNS	Nervous System	Parthenaise	Female
SAMEA112366775	Bos taurus	PAIRED	Parthenaise	Unknown	Female	ILLUMINA	Illumina NovaSeq 6000	Cerebellum	CNS	Nervous System	True	CNS	Nervous System	Parthenaise	Female
SAMEA112366776	Bos taurus	PAIRED	Parthenaise	Unknown	Female	ILLUMINA	Illumina NovaSeq 6000	Brain	CNS	Nervous System	True	CNS	Nervous System	Parthenaise	Female
SAMEA112366777	Bos taurus	PAIRED	Parthenaise	Unknown	Female	ILLUMINA	Illumina NovaSeq 6000	Cerebellum	CNS	Nervous System	True	CNS	Nervous System	Parthenaise	Female
SAMEA112366778	Bos taurus	PAIRED	Parthenaise	Unknown	Female	ILLUMINA	Illumina NovaSeq 6000	Brain	CNS	Nervous System	True	CNS	Nervous System	Parthenaise	Female
SAMEA112843208	Bos taurus	PAIRED	Unknown	Unknown	Male	ILLUMINA	Illumina NovaSeq 6000	Testis	Testis	Male Reproductive System	True	Testis	Male Reproductive System	Holstein	Male
SAMEA112946140	Bos taurus	PAIRED	Unknown	Unknown	Female	ILLUMINA	Illumina HiSeq 3000	Mammary Epithelial Cell	Mammary Gland	Mammary Gland	False	Cell Line	Cell Line	Holstein	Female
SAMEA112946141	Bos taurus	PAIRED	Unknown	Unknown	Female	ILLUMINA	Illumina HiSeq 3000	Mammary Epithelial Cell	Mammary Gland	Mammary Gland	False	Cell Line	Cell Line	Holstein	Female
SAMEA112946142	Bos taurus	PAIRED	Unknown	Unknown	Female	ILLUMINA	Illumina HiSeq 3000	Mammary Epithelial Cell	Mammary Gland	Mammary Gland	False	Cell Line	Cell Line	Holstein	Female
SAMEA112946143	Bos taurus	PAIRED	Unknown	Unknown	Female	ILLUMINA	Illumina HiSeq 3000	Mammary Epithelial Cell	Mammary Gland	Mammary Gland	False	Cell Line	Cell Line	Holstein	Female
SAMEA112946144	Bos taurus	PAIRED	Unknown	Unknown	Female	ILLUMINA	Illumina HiSeq 3000	Mammary Epithelial Cell	Mammary Gland	Mammary Gland	False	Cell Line	Cell Line	Holstein	Female
SAMEA112946145	Bos taurus	PAIRED	Unknown	Unknown	Female	ILLUMINA	Illumina HiSeq 3000	Mammary Epithelial Cell	Mammary Gland	Mammary Gland	False	Cell Line	Cell Line	Holstein	Female
SAMEA112946146	Bos taurus	PAIRED	Unknown	Unknown	Female	ILLUMINA	Illumina HiSeq 3000	Mammary Epithelial Cell	Mammary Gland	Mammary Gland	False	Cell Line	Cell Line	Holstein	Female
SAMEA112946147	Bos taurus	PAIRED	Unknown	Unknown	Female	ILLUMINA	Illumina HiSeq 3000	Mammary Epithelial Cell	Mammary Gland	Mammary Gland	False	Cell Line	Cell Line	Holstein	Female
SAMEA112946148	Bos taurus	PAIRED	Unknown	Unknown	Female	ILLUMINA	Illumina HiSeq 3000	Mammary Epithelial Cell	Mammary Gland	Mammary Gland	False	Cell Line	Cell Line	Holstein	Female
SAMEA112946149	Bos taurus	PAIRED	Unknown	Unknown	Female	ILLUMINA	Illumina HiSeq 3000	Mammary Epithelial Cell	Mammary Gland	Mammary Gland	False	Cell Line	Cell Line	Holstein	Female
SAMEA112946150	Bos taurus	PAIRED	Unknown	Unknown	Female	ILLUMINA	Illumina HiSeq 3000	Mammary Epithelial Cell	Mammary Gland	Mammary Gland	False	Cell Line	Cell Line	Holstein	Female
SAMEA112946151	Bos taurus	PAIRED	Unknown	Unknown	Female	ILLUMINA	Illumina HiSeq 3000	Mammary Epithelial Cell	Mammary Gland	Mammary Gland	False	Cell Line	Cell Line	Holstein	Female
SAMEA112946152	Bos taurus	PAIRED	Unknown	Unknown	Female	ILLUMINA	Illumina HiSeq 3000	Mammary Epithelial Cell	Mammary Gland	Mammary Gland	False	Cell Line	Cell Line	Holstein	Female
SAMEA112946153	Bos taurus	PAIRED	Unknown	Unknown	Female	ILLUMINA	Illumina HiSeq 3000	Mammary Epithelial Cell	Mammary Gland	Mammary Gland	False	Cell Line	Cell Line	Holstein	Female
SAMEA112946154	Bos taurus	PAIRED	Unknown	Unknown	Female	ILLUMINA	Illumina HiSeq 3000	Mammary Epithelial Cell	Mammary Gland	Mammary Gland	False	Cell Line	Cell Line	Holstein	Female
SAMEA112946155	Bos taurus	PAIRED	Unknown	Unknown	Female	ILLUMINA	Illumina HiSeq 3000	Mammary Epithelial Cell	Mammary Gland	Mammary Gland	False	Cell Line	Cell Line	Holstein	Female
SAMEA112946156	Bos taurus	PAIRED	Unknown	Unknown	Female	ILLUMINA	Illumina HiSeq 3000	Mammary Epithelial Cell	Mammary Gland	Mammary Gland	False	Cell Line	Cell Line	Holstein	Female
SAMEA112946157	Bos taurus	PAIRED	Unknown	Unknown	Female	ILLUMINA	Illumina HiSeq 3000	Mammary Epithelial Cell	Mammary Gland	Mammary Gland	False	Cell Line	Cell Line	Holstein	Female
SAMEA113578967	Bos taurus	PAIRED	Unknown	Unknown	Male	ILLUMINA	Illumina NovaSeq 6000	Sperm	Sperm	Male Reproductive System	True	Sperm	Male Reproductive System	Brown Swiss	Male
SAMEA113578968	Bos taurus	PAIRED	Unknown	Unknown	Male	ILLUMINA	Illumina NovaSeq 6000	Sperm	Sperm	Male Reproductive System	True	Sperm	Male Reproductive System	Simmental	Male
SAMEA113578969	Bos taurus	PAIRED	Unknown	Unknown	Male	ILLUMINA	Illumina NovaSeq 6000	Sperm	Sperm	Male Reproductive System	True	Sperm	Male Reproductive System	Brown Swiss	Male
SAMEA113578970	Bos taurus	PAIRED	Unknown	Unknown	Male	ILLUMINA	Illumina NovaSeq 6000	Sperm	Sperm	Male Reproductive System	True	Sperm	Male Reproductive System	Original Braunvieh	Male
SAMEA113578971	Bos taurus	PAIRED	Unknown	Unknown	Male	ILLUMINA	Illumina NovaSeq 6000	Sperm	Sperm	Male Reproductive System	True	Sperm	Male Reproductive System	Brown Swiss	Male
SAMEA113578972	Bos taurus	PAIRED	Unknown	Unknown	Male	ILLUMINA	Illumina NovaSeq 6000	Sperm	Sperm	Male Reproductive System	True	Sperm	Male Reproductive System	Brown Swiss	Male
SAMEA113578973	Bos taurus	PAIRED	Unknown	Unknown	Male	ILLUMINA	Illumina NovaSeq 6000	Sperm	Sperm	Male Reproductive System	True	Sperm	Male Reproductive System	Limousin	Male
SAMEA113578974	Bos taurus	PAIRED	Unknown	Unknown	Male	ILLUMINA	Illumina NovaSeq 6000	Sperm	Sperm	Male Reproductive System	True	Sperm	Male Reproductive System	Original Braunvieh	Male
SAMEA113578975	Bos taurus	PAIRED	Unknown	Unknown	Male	ILLUMINA	Illumina NovaSeq 6000	Sperm	Sperm	Male Reproductive System	True	Sperm	Male Reproductive System	Brown Swiss	Male
SAMEA113578976	Bos taurus	PAIRED	Unknown	Unknown	Male	ILLUMINA	Illumina NovaSeq 6000	Sperm	Sperm	Male Reproductive System	True	Sperm	Male Reproductive System	Holstein	Male
SAMEA113578977	Bos taurus	PAIRED	Unknown	Unknown	Male	ILLUMINA	Illumina NovaSeq 6000	Sperm	Sperm	Male Reproductive System	True	Sperm	Male Reproductive System	Original Braunvieh	Male
SAMEA113578978	Bos taurus	PAIRED	Unknown	Unknown	Male	ILLUMINA	Illumina NovaSeq 6000	Sperm	Sperm	Male Reproductive System	True	Sperm	Male Reproductive System	Brown Swiss	Male
SAMEA113578979	Bos taurus	PAIRED	Unknown	Unknown	Male	ILLUMINA	Illumina NovaSeq 6000	Sperm	Sperm	Male Reproductive System	True	Sperm	Male Reproductive System	Brown Swiss	Male
SAMEA113578980	Bos taurus	PAIRED	Unknown	Unknown	Male	ILLUMINA	Illumina NovaSeq 6000	Sperm	Sperm	Male Reproductive System	True	Sperm	Male Reproductive System	Brown Swiss	Male
SAMEA113578981	Bos taurus	PAIRED	Unknown	Unknown	Male	ILLUMINA	Illumina NovaSeq 6000	Sperm	Sperm	Male Reproductive System	True	Sperm	Male Reproductive System	Brown Swiss	Male
SAMEA113578982	Bos taurus	PAIRED	Unknown	Unknown	Male	ILLUMINA	Illumina NovaSeq 6000	Sperm	Sperm	Male Reproductive System	True	Sperm	Male Reproductive System	Original Braunvieh	Male
SAMEA113601195	Bos taurus	PAIRED	Unknown	Unknown	Male	ILLUMINA	Illumina NovaSeq 6000	Epididymis	Epididymis	Male Reproductive System	True	Epididymis	Male Reproductive System	Brown Swiss	Male
SAMEA113601196	Bos taurus	PAIRED	Unknown	Unknown	Male	ILLUMINA	Illumina NovaSeq 6000	Epididymis	Epididymis	Male Reproductive System	True	Epididymis	Male Reproductive System	Brown Swiss	Male
SAMEA113601197	Bos taurus	PAIRED	Unknown	Unknown	Male	ILLUMINA	Illumina NovaSeq 6000	Epididymis	Epididymis	Male Reproductive System	True	Epididymis	Male Reproductive System	Brown Swiss	Male
SAMEA113601198	Bos taurus	PAIRED	Unknown	Unknown	Male	ILLUMINA	Illumina NovaSeq 6000	Epididymis	Epididymis	Male Reproductive System	True	Epididymis	Male Reproductive System	Original Braunvieh	Male
SAMEA113601199	Bos taurus	PAIRED	Unknown	Unknown	Male	ILLUMINA	Illumina NovaSeq 6000	Epididymis	Epididymis	Male Reproductive System	True	Epididymis	Male Reproductive System	Brown Swiss	Male
SAMEA113601200	Bos taurus	PAIRED	Unknown	Unknown	Male	ILLUMINA	Illumina NovaSeq 6000	Epididymis	Epididymis	Male Reproductive System	True	Epididymis	Male Reproductive System	Brown Swiss	Male
SAMEA113601201	Bos taurus	PAIRED	Unknown	Unknown	Male	ILLUMINA	Illumina NovaSeq 6000	Epididymis	Epididymis	Male Reproductive System	True	Epididymis	Male Reproductive System	Original Braunvieh	Male
SAMEA113601202	Bos taurus	PAIRED	Unknown	Unknown	Male	ILLUMINA	Illumina NovaSeq 6000	Epididymis	Epididymis	Male Reproductive System	True	Epididymis	Male Reproductive System	Brown Swiss	Male
SAMEA113601203	Bos taurus	PAIRED	Unknown	Unknown	Male	ILLUMINA	Illumina NovaSeq 6000	Epididymis	Epididymis	Male Reproductive System	True	Epididymis	Male Reproductive System	Original Braunvieh	Male
SAMEA113601204	Bos taurus	PAIRED	Unknown	Unknown	Male	ILLUMINA	Illumina NovaSeq 6000	Epididymis	Epididymis	Male Reproductive System	True	Epididymis	Male Reproductive System	Original Braunvieh	Male
SAMEA113601205	Bos taurus	PAIRED	Unknown	Unknown	Male	ILLUMINA	Illumina NovaSeq 6000	Epididymis	Epididymis	Male Reproductive System	True	Epididymis	Male Reproductive System	Original Braunvieh	Male
SAMEA113601206	Bos taurus	PAIRED	Unknown	Unknown	Male	ILLUMINA	Illumina NovaSeq 6000	Epididymis	Epididymis	Male Reproductive System	True	Epididymis	Male Reproductive System	Original Braunvieh	Male
SAMEA113601207	Bos taurus	PAIRED	Unknown	Unknown	Male	ILLUMINA	Illumina NovaSeq 6000	Epididymis	Epididymis	Male Reproductive System	True	Epididymis	Male Reproductive System	Brown Swiss	Male
SAMEA113601208	Bos taurus	PAIRED	Unknown	Unknown	Male	ILLUMINA	Illumina NovaSeq 6000	Epididymis	Epididymis	Male Reproductive System	True	Epididymis	Male Reproductive System	Brown Swiss	Male
SAMEA113601209	Bos taurus	PAIRED	Unknown	Unknown	Male	ILLUMINA	Illumina NovaSeq 6000	Epididymis	Epididymis	Male Reproductive System	True	Epididymis	Male Reproductive System	Brown Swiss	Male
SAMEA113601210	Bos taurus	PAIRED	Unknown	Unknown	Male	ILLUMINA	Illumina NovaSeq 6000	Epididymis	Epididymis	Male Reproductive System	True	Epididymis	Male Reproductive System	Original Braunvieh	Male
SAMEA113601211	Bos taurus	PAIRED	Unknown	Unknown	Male	ILLUMINA	Illumina NovaSeq 6000	Epididymis	Epididymis	Male Reproductive System	True	Epididymis	Male Reproductive System	Holstein	Male
SAMEA113601212	Bos taurus	PAIRED	Unknown	Unknown	Male	ILLUMINA	Illumina NovaSeq 6000	Epididymis	Epididymis	Male Reproductive System	True	Epididymis	Male Reproductive System	Original Braunvieh	Male
SAMEA113601213	Bos taurus	PAIRED	Unknown	Unknown	Male	ILLUMINA	Illumina NovaSeq 6000	Epididymis	Epididymis	Male Reproductive System	True	Epididymis	Male Reproductive System	Brown Swiss	Male
SAMEA113601214	Bos taurus	PAIRED	Unknown	Unknown	Male	ILLUMINA	Illumina NovaSeq 6000	Epididymis	Epididymis	Male Reproductive System	True	Epididymis	Male Reproductive System	Brown Swiss	Male
SAMEA113601215	Bos taurus	PAIRED	Unknown	Unknown	Male	ILLUMINA	Illumina NovaSeq 6000	Epididymis	Epididymis	Male Reproductive System	True	Epididymis	Male Reproductive System	Brown Swiss	Male
SAMEA113601216	Bos taurus	PAIRED	Unknown	Unknown	Male	ILLUMINA	Illumina NovaSeq 6000	Epididymis	Epididymis	Male Reproductive System	True	Epididymis	Male Reproductive System	Brown Swiss	Male
SAMEA113601217	Bos taurus	PAIRED	Unknown	Unknown	Male	ILLUMINA	Illumina NovaSeq 6000	Epididymis	Epididymis	Male Reproductive System	True	Epididymis	Male Reproductive System	Brown Swiss	Male
SAMEA113601218	Bos taurus	PAIRED	Unknown	Unknown	Male	ILLUMINA	Illumina NovaSeq 6000	Epididymis	Epididymis	Male Reproductive System	True	Epididymis	Male Reproductive System	Brown Swiss	Male
SAMEA113601219	Bos taurus	PAIRED	Unknown	Unknown	Male	ILLUMINA	Illumina NovaSeq 6000	Epididymis	Epididymis	Male Reproductive System	True	Epididymis	Male Reproductive System	Holstein	Male
SAMEA113601220	Bos taurus	PAIRED	Unknown	Unknown	Male	ILLUMINA	Illumina NovaSeq 6000	Epididymis	Epididymis	Male Reproductive System	Failed	Epididymis	Male Reproductive System	Unknown	Male
SAMEA113601221	Bos taurus	PAIRED	Unknown	Unknown	Male	ILLUMINA	Illumina NovaSeq 6000	Epididymis	Epididymis	Male Reproductive System	True	Epididymis	Male Reproductive System	Brown Swiss	Male
SAMEA113601222	Bos taurus	PAIRED	Unknown	Unknown	Male	ILLUMINA	Illumina NovaSeq 6000	Epididymis	Epididymis	Male Reproductive System	True	Epididymis	Male Reproductive System	Brown Swiss	Male
SAMEA113601223	Bos taurus	PAIRED	Unknown	Unknown	Male	ILLUMINA	Illumina NovaSeq 6000	Epididymis	Epididymis	Male Reproductive System	True	Epididymis	Male Reproductive System	Brown Swiss	Male
SAMEA113601224	Bos taurus	PAIRED	Unknown	Unknown	Male	ILLUMINA	Illumina NovaSeq 6000	Epididymis	Epididymis	Male Reproductive System	True	Epididymis	Male Reproductive System	Brown Swiss	Male
SAMEA113601225	Bos taurus	PAIRED	Unknown	Unknown	Male	ILLUMINA	Illumina NovaSeq 6000	Epididymis	Epididymis	Male Reproductive System	True	Epididymis	Male Reproductive System	Original Braunvieh	Male
SAMEA113601226	Bos taurus	PAIRED	Unknown	Unknown	Male	ILLUMINA	Illumina NovaSeq 6000	Epididymis	Epididymis	Male Reproductive System	True	Epididymis	Male Reproductive System	Original Braunvieh	Male
SAMEA113601227	Bos taurus	PAIRED	Unknown	Unknown	Male	ILLUMINA	Illumina NovaSeq 6000	Epididymis	Epididymis	Male Reproductive System	True	Epididymis	Male Reproductive System	Brown Swiss	Male
SAMEA113601228	Bos taurus	PAIRED	Unknown	Unknown	Male	ILLUMINA	Illumina NovaSeq 6000	Epididymis	Epididymis	Male Reproductive System	True	Epididymis	Male Reproductive System	Brown Swiss	Male
SAMEA113601229	Bos taurus	PAIRED	Unknown	Unknown	Male	ILLUMINA	Illumina NovaSeq 6000	Epididymis	Epididymis	Male Reproductive System	True	Epididymis	Male Reproductive System	Original Braunvieh	Male
SAMEA113601230	Bos taurus	PAIRED	Unknown	Unknown	Male	ILLUMINA	Illumina NovaSeq 6000	Epididymis	Epididymis	Male Reproductive System	True	Epididymis	Male Reproductive System	Original Braunvieh	Male
SAMEA113601231	Bos taurus	PAIRED	Unknown	Unknown	Male	ILLUMINA	Illumina NovaSeq 6000	Epididymis	Epididymis	Male Reproductive System	True	Epididymis	Male Reproductive System	Brown Swiss	Male
SAMEA113601232	Bos taurus	PAIRED	Unknown	Unknown	Male	ILLUMINA	Illumina NovaSeq 6000	Epididymis	Epididymis	Male Reproductive System	Failed	Epididymis	Male Reproductive System	Unknown	Male
SAMEA113601233	Bos taurus	PAIRED	Unknown	Unknown	Male	ILLUMINA	Illumina NovaSeq 6000	Epididymis	Epididymis	Male Reproductive System	True	Epididymis	Male Reproductive System	Brown Swiss	Male
SAMEA113601234	Bos taurus	PAIRED	Unknown	Unknown	Male	ILLUMINA	Illumina NovaSeq 6000	Epididymis	Epididymis	Male Reproductive System	True	Epididymis	Male Reproductive System	Brown Swiss	Male
SAMEA113601235	Bos taurus	PAIRED	Unknown	Unknown	Male	ILLUMINA	Illumina NovaSeq 6000	Epididymis	Epididymis	Male Reproductive System	True	Epididymis	Male Reproductive System	Brown Swiss	Male
SAMEA113601236	Bos taurus	PAIRED	Unknown	Unknown	Male	ILLUMINA	Illumina NovaSeq 6000	Epididymis	Epididymis	Male Reproductive System	True	Epididymis	Male Reproductive System	Brown Swiss	Male
SAMEA113601237	Bos taurus	PAIRED	Unknown	Unknown	Male	ILLUMINA	Illumina NovaSeq 6000	Epididymis	Epididymis	Male Reproductive System	True	Epididymis	Male Reproductive System	Brown Swiss	Male
SAMEA113601238	Bos taurus	PAIRED	Unknown	Unknown	Male	ILLUMINA	Illumina NovaSeq 6000	Epididymis	Epididymis	Male Reproductive System	True	Epididymis	Male Reproductive System	Brown Swiss	Male
SAMEA113601239	Bos taurus	PAIRED	Unknown	Unknown	Male	ILLUMINA	Illumina NovaSeq 6000	Epididymis	Epididymis	Male Reproductive System	Failed	Epididymis	Male Reproductive System	Unknown	Male
SAMEA113601240	Bos taurus	PAIRED	Unknown	Unknown	Male	ILLUMINA	Illumina NovaSeq 6000	Epididymis	Epididymis	Male Reproductive System	True	Epididymis	Male Reproductive System	Brown Swiss	Male
SAMEA113601241	Bos taurus	PAIRED	Unknown	Unknown	Male	ILLUMINA	Illumina NovaSeq 6000	Epididymis	Epididymis	Male Reproductive System	True	Epididymis	Male Reproductive System	Original Braunvieh	Male
SAMEA113601242	Bos taurus	PAIRED	Unknown	Unknown	Male	ILLUMINA	Illumina NovaSeq 6000	Epididymis	Epididymis	Male Reproductive System	True	Epididymis	Male Reproductive System	Holstein	Male
SAMEA113601243	Bos taurus	PAIRED	Unknown	Unknown	Male	ILLUMINA	Illumina NovaSeq 6000	Epididymis	Epididymis	Male Reproductive System	True	Epididymis	Male Reproductive System	Brown Swiss	Male
SAMEA113601244	Bos taurus	PAIRED	Unknown	Unknown	Male	ILLUMINA	Illumina NovaSeq 6000	Epididymis	Epididymis	Male Reproductive System	True	Epididymis	Male Reproductive System	Brown Swiss	Male
SAMEA113601245	Bos taurus	PAIRED	Unknown	Unknown	Male	ILLUMINA	Illumina NovaSeq 6000	Epididymis	Epididymis	Male Reproductive System	Failed	Epididymis	Male Reproductive System	Unknown	Male
SAMEA113601246	Bos taurus	PAIRED	Unknown	Unknown	Male	ILLUMINA	Illumina NovaSeq 6000	Epididymis	Epididymis	Male Reproductive System	True	Epididymis	Male Reproductive System	Original Braunvieh	Male
SAMEA113601247	Bos taurus	PAIRED	Unknown	Unknown	Male	ILLUMINA	Illumina NovaSeq 6000	Epididymis	Epididymis	Male Reproductive System	True	Epididymis	Male Reproductive System	Holstein	Male
SAMEA113601248	Bos taurus	PAIRED	Unknown	Unknown	Male	ILLUMINA	Illumina NovaSeq 6000	Epididymis	Epididymis	Male Reproductive System	True	Epididymis	Male Reproductive System	Brown Swiss	Male
SAMEA113601249	Bos taurus	PAIRED	Unknown	Unknown	Male	ILLUMINA	Illumina NovaSeq 6000	Epididymis	Epididymis	Male Reproductive System	True	Epididymis	Male Reproductive System	Brown Swiss	Male
SAMEA113601250	Bos taurus	PAIRED	Unknown	Unknown	Male	ILLUMINA	Illumina NovaSeq 6000	Epididymis	Epididymis	Male Reproductive System	True	Epididymis	Male Reproductive System	Brown Swiss	Male
SAMEA113601251	Bos taurus	PAIRED	Unknown	Unknown	Male	ILLUMINA	Illumina NovaSeq 6000	Epididymis	Epididymis	Male Reproductive System	True	Epididymis	Male Reproductive System	Brown Swiss	Male
SAMEA113601252	Bos taurus	PAIRED	Unknown	Unknown	Male	ILLUMINA	Illumina NovaSeq 6000	Epididymis	Epididymis	Male Reproductive System	True	Epididymis	Male Reproductive System	Brown Swiss	Male
SAMEA113601253	Bos taurus	PAIRED	Unknown	Unknown	Male	ILLUMINA	Illumina NovaSeq 6000	Epididymis	Epididymis	Male Reproductive System	True	Epididymis	Male Reproductive System	Original Braunvieh	Male
SAMEA113601254	Bos taurus	PAIRED	Unknown	Unknown	Male	ILLUMINA	Illumina NovaSeq 6000	Epididymis	Epididymis	Male Reproductive System	True	Epididymis	Male Reproductive System	Brown Swiss	Male
SAMEA113601255	Bos taurus	PAIRED	Unknown	Unknown	Male	ILLUMINA	Illumina NovaSeq 6000	Epididymis	Epididymis	Male Reproductive System	True	Epididymis	Male Reproductive System	Original Braunvieh	Male
SAMEA113601256	Bos taurus	PAIRED	Unknown	Unknown	Male	ILLUMINA	Illumina NovaSeq 6000	Epididymis	Epididymis	Male Reproductive System	Failed	Epididymis	Male Reproductive System	Unknown	Male
SAMEA113601257	Bos taurus	PAIRED	Unknown	Unknown	Male	ILLUMINA	Illumina NovaSeq 6000	Epididymis	Epididymis	Male Reproductive System	True	Epididymis	Male Reproductive System	Holstein	Male
SAMEA113601258	Bos taurus	PAIRED	Unknown	Unknown	Male	ILLUMINA	Illumina NovaSeq 6000	Epididymis	Epididymis	Male Reproductive System	True	Epididymis	Male Reproductive System	Brown Swiss	Male
SAMEA113601259	Bos taurus	PAIRED	Unknown	Unknown	Male	ILLUMINA	Illumina NovaSeq 6000	Epididymis	Epididymis	Male Reproductive System	True	Epididymis	Male Reproductive System	Brown Swiss	Male
SAMEA113601260	Bos taurus	PAIRED	Unknown	Unknown	Male	ILLUMINA	Illumina NovaSeq 6000	Epididymis	Epididymis	Male Reproductive System	True	Epididymis	Male Reproductive System	Brown Swiss	Male
SAMEA113601261	Bos taurus	PAIRED	Unknown	Unknown	Male	ILLUMINA	Illumina NovaSeq 6000	Epididymis	Epididymis	Male Reproductive System	True	Epididymis	Male Reproductive System	Original Braunvieh	Male
SAMEA113601262	Bos taurus	PAIRED	Unknown	Unknown	Male	ILLUMINA	Illumina NovaSeq 6000	Epididymis	Epididymis	Male Reproductive System	True	Epididymis	Male Reproductive System	Brown Swiss	Male
SAMEA113601263	Bos taurus	PAIRED	Unknown	Unknown	Male	ILLUMINA	Illumina NovaSeq 6000	Epididymis	Epididymis	Male Reproductive System	True	Epididymis	Male Reproductive System	Brown Swiss	Male
SAMEA113601264	Bos taurus	PAIRED	Unknown	Unknown	Male	ILLUMINA	Illumina NovaSeq 6000	Epididymis	Epididymis	Male Reproductive System	True	Epididymis	Male Reproductive System	Brown Swiss	Male
SAMEA113601265	Bos taurus	PAIRED	Unknown	Unknown	Male	ILLUMINA	Illumina NovaSeq 6000	Epididymis	Epididymis	Male Reproductive System	Failed	Epididymis	Male Reproductive System	Unknown	Male
SAMEA113601266	Bos taurus	PAIRED	Unknown	Unknown	Male	ILLUMINA	Illumina NovaSeq 6000	Epididymis	Epididymis	Male Reproductive System	True	Epididymis	Male Reproductive System	Brown Swiss	Male
SAMEA113601267	Bos taurus	PAIRED	Unknown	Unknown	Male	ILLUMINA	Illumina NovaSeq 6000	Epididymis	Epididymis	Male Reproductive System	True	Epididymis	Male Reproductive System	Simmental	Male
SAMEA113601268	Bos taurus	PAIRED	Unknown	Unknown	Male	ILLUMINA	Illumina NovaSeq 6000	Epididymis	Epididymis	Male Reproductive System	True	Epididymis	Male Reproductive System	Brown Swiss	Male
SAMEA113601269	Bos taurus	PAIRED	Unknown	Unknown	Male	ILLUMINA	Illumina NovaSeq 6000	Epididymis	Epididymis	Male Reproductive System	True	Epididymis	Male Reproductive System	Original Braunvieh	Male
SAMEA113601270	Bos taurus	PAIRED	Unknown	Unknown	Male	ILLUMINA	Illumina NovaSeq 6000	Epididymis	Epididymis	Male Reproductive System	True	Epididymis	Male Reproductive System	Original Braunvieh	Male
SAMEA113601271	Bos taurus	PAIRED	Unknown	Unknown	Male	ILLUMINA	Illumina NovaSeq 6000	Epididymis	Epididymis	Male Reproductive System	True	Epididymis	Male Reproductive System	Original Braunvieh	Male
SAMEA113601272	Bos taurus	PAIRED	Unknown	Unknown	Male	ILLUMINA	Illumina NovaSeq 6000	Epididymis	Epididymis	Male Reproductive System	True	Epididymis	Male Reproductive System	Brown Swiss	Male
SAMEA113601273	Bos taurus	PAIRED	Unknown	Unknown	Male	ILLUMINA	Illumina NovaSeq 6000	Epididymis	Epididymis	Male Reproductive System	True	Epididymis	Male Reproductive System	Brown Swiss	Male
SAMEA113601274	Bos taurus	PAIRED	Unknown	Unknown	Male	ILLUMINA	Illumina NovaSeq 6000	Epididymis	Epididymis	Male Reproductive System	True	Epididymis	Male Reproductive System	Brown Swiss	Male
SAMEA113601275	Bos taurus	PAIRED	Unknown	Unknown	Male	ILLUMINA	Illumina NovaSeq 6000	Epididymis	Epididymis	Male Reproductive System	True	Epididymis	Male Reproductive System	Brown Swiss	Male
SAMEA113601276	Bos taurus	PAIRED	Unknown	Unknown	Male	ILLUMINA	Illumina NovaSeq 6000	Epididymis	Epididymis	Male Reproductive System	True	Epididymis	Male Reproductive System	Original Braunvieh	Male
SAMEA113601277	Bos taurus	PAIRED	Unknown	Unknown	Male	ILLUMINA	Illumina NovaSeq 6000	Epididymis	Epididymis	Male Reproductive System	True	Epididymis	Male Reproductive System	Brown Swiss	Male
SAMEA113601278	Bos taurus	PAIRED	Unknown	Unknown	Male	ILLUMINA	Illumina NovaSeq 6000	Epididymis	Epididymis	Male Reproductive System	True	Epididymis	Male Reproductive System	Brown Swiss	Male
SAMEA113601279	Bos taurus	PAIRED	Unknown	Unknown	Male	ILLUMINA	Illumina NovaSeq 6000	Epididymis	Epididymis	Male Reproductive System	True	Epididymis	Male Reproductive System	Original Braunvieh	Male
SAMEA113601280	Bos taurus	PAIRED	Unknown	Unknown	Male	ILLUMINA	Illumina NovaSeq 6000	Epididymis	Epididymis	Male Reproductive System	True	Epididymis	Male Reproductive System	Original Braunvieh	Male
SAMEA113601281	Bos taurus	PAIRED	Unknown	Unknown	Male	ILLUMINA	Illumina NovaSeq 6000	Epididymis	Epididymis	Male Reproductive System	True	Epididymis	Male Reproductive System	Brown Swiss	Male
SAMEA113601282	Bos taurus	PAIRED	Unknown	Unknown	Male	ILLUMINA	Illumina NovaSeq 6000	Epididymis	Epididymis	Male Reproductive System	True	Epididymis	Male Reproductive System	Brown Swiss	Male
SAMEA113601283	Bos taurus	PAIRED	Unknown	Unknown	Male	ILLUMINA	Illumina NovaSeq 6000	Epididymis	Epididymis	Male Reproductive System	True	Epididymis	Male Reproductive System	Original Braunvieh	Male
SAMEA113601284	Bos taurus	PAIRED	Unknown	Unknown	Male	ILLUMINA	Illumina NovaSeq 6000	Epididymis	Epididymis	Male Reproductive System	True	Epididymis	Male Reproductive System	Brown Swiss	Male
SAMEA113601285	Bos taurus	PAIRED	Unknown	Unknown	Male	ILLUMINA	Illumina NovaSeq 6000	Epididymis	Epididymis	Male Reproductive System	True	Epididymis	Male Reproductive System	Original Braunvieh	Male
SAMEA113601286	Bos taurus	PAIRED	Unknown	Unknown	Male	ILLUMINA	Illumina NovaSeq 6000	Epididymis	Epididymis	Male Reproductive System	True	Epididymis	Male Reproductive System	Brown Swiss	Male
SAMEA113601287	Bos taurus	PAIRED	Unknown	Unknown	Male	ILLUMINA	Illumina NovaSeq 6000	Epididymis	Epididymis	Male Reproductive System	True	Epididymis	Male Reproductive System	Brown Swiss	Male
SAMEA113601288	Bos taurus	PAIRED	Unknown	Unknown	Male	ILLUMINA	Illumina NovaSeq 6000	Epididymis	Epididymis	Male Reproductive System	True	Epididymis	Male Reproductive System	Brown Swiss	Male
SAMEA113601289	Bos taurus	PAIRED	Unknown	Unknown	Male	ILLUMINA	Illumina NovaSeq 6000	Epididymis	Epididymis	Male Reproductive System	True	Epididymis	Male Reproductive System	Original Braunvieh	Male
SAMEA113601290	Bos taurus	PAIRED	Unknown	Unknown	Male	ILLUMINA	Illumina NovaSeq 6000	Epididymis	Epididymis	Male Reproductive System	True	Epididymis	Male Reproductive System	Brown Swiss	Male
SAMEA113601291	Bos taurus	PAIRED	Unknown	Unknown	Male	ILLUMINA	Illumina NovaSeq 6000	Epididymis	Epididymis	Male Reproductive System	True	Epididymis	Male Reproductive System	Brown Swiss	Male
SAMEA113601292	Bos taurus	PAIRED	Unknown	Unknown	Male	ILLUMINA	Illumina NovaSeq 6000	Epididymis	Epididymis	Male Reproductive System	True	Epididymis	Male Reproductive System	Original Braunvieh	Male
SAMEA113601293	Bos taurus	PAIRED	Unknown	Unknown	Male	ILLUMINA	Illumina NovaSeq 6000	Epididymis	Epididymis	Male Reproductive System	True	Epididymis	Male Reproductive System	Brown Swiss	Male
SAMEA113601294	Bos taurus	PAIRED	Unknown	Unknown	Male	ILLUMINA	Illumina NovaSeq 6000	Epididymis	Epididymis	Male Reproductive System	True	Epididymis	Male Reproductive System	Original Braunvieh	Male
SAMEA113601295	Bos taurus	PAIRED	Unknown	Unknown	Male	ILLUMINA	Illumina NovaSeq 6000	Epididymis	Epididymis	Male Reproductive System	True	Epididymis	Male Reproductive System	Original Braunvieh	Male
SAMEA113601296	Bos taurus	PAIRED	Unknown	Unknown	Male	ILLUMINA	Illumina NovaSeq 6000	Epididymis	Epididymis	Male Reproductive System	True	Epididymis	Male Reproductive System	Original Braunvieh	Male
SAMEA113601297	Bos taurus	PAIRED	Unknown	Unknown	Male	ILLUMINA	Illumina NovaSeq 6000	Epididymis	Epididymis	Male Reproductive System	True	Epididymis	Male Reproductive System	Brown Swiss	Male
SAMEA113601298	Bos taurus	PAIRED	Unknown	Unknown	Male	ILLUMINA	Illumina NovaSeq 6000	Vas Deferens	Vas Deferens	Male Reproductive System	True	Vas Deferens	Male Reproductive System	Brown Swiss	Male
SAMEA113601299	Bos taurus	PAIRED	Unknown	Unknown	Male	ILLUMINA	Illumina NovaSeq 6000	Vas Deferens	Vas Deferens	Male Reproductive System	True	Vas Deferens	Male Reproductive System	Brown Swiss	Male
SAMEA113601300	Bos taurus	PAIRED	Unknown	Unknown	Male	ILLUMINA	Illumina NovaSeq 6000	Vas Deferens	Vas Deferens	Male Reproductive System	True	Vas Deferens	Male Reproductive System	Original Braunvieh	Male
SAMEA113601301	Bos taurus	PAIRED	Unknown	Unknown	Male	ILLUMINA	Illumina NovaSeq 6000	Vas Deferens	Vas Deferens	Male Reproductive System	True	Vas Deferens	Male Reproductive System	Brown Swiss	Male
SAMEA113601302	Bos taurus	PAIRED	Unknown	Unknown	Male	ILLUMINA	Illumina NovaSeq 6000	Vas Deferens	Vas Deferens	Male Reproductive System	True	Vas Deferens	Male Reproductive System	Brown Swiss	Male
SAMEA113601303	Bos taurus	PAIRED	Unknown	Unknown	Male	ILLUMINA	Illumina NovaSeq 6000	Vas Deferens	Vas Deferens	Male Reproductive System	True	Vas Deferens	Male Reproductive System	Original Braunvieh	Male
SAMEA113601304	Bos taurus	PAIRED	Unknown	Unknown	Male	ILLUMINA	Illumina NovaSeq 6000	Vas Deferens	Vas Deferens	Male Reproductive System	True	Vas Deferens	Male Reproductive System	Brown Swiss	Male
SAMEA113601305	Bos taurus	PAIRED	Unknown	Unknown	Male	ILLUMINA	Illumina NovaSeq 6000	Vas Deferens	Vas Deferens	Male Reproductive System	True	Vas Deferens	Male Reproductive System	Original Braunvieh	Male
SAMEA113601306	Bos taurus	PAIRED	Unknown	Unknown	Male	ILLUMINA	Illumina NovaSeq 6000	Vas Deferens	Vas Deferens	Male Reproductive System	True	Vas Deferens	Male Reproductive System	Original Braunvieh	Male
SAMEA113601307	Bos taurus	PAIRED	Unknown	Unknown	Male	ILLUMINA	Illumina NovaSeq 6000	Vas Deferens	Vas Deferens	Male Reproductive System	True	Vas Deferens	Male Reproductive System	Brown Swiss	Male
SAMEA113601308	Bos taurus	PAIRED	Unknown	Unknown	Male	ILLUMINA	Illumina NovaSeq 6000	Vas Deferens	Vas Deferens	Male Reproductive System	True	Vas Deferens	Male Reproductive System	Brown Swiss	Male
SAMEA113601309	Bos taurus	PAIRED	Unknown	Unknown	Male	ILLUMINA	Illumina NovaSeq 6000	Vas Deferens	Vas Deferens	Male Reproductive System	True	Vas Deferens	Male Reproductive System	Brown Swiss	Male
SAMEA113601310	Bos taurus	PAIRED	Unknown	Unknown	Male	ILLUMINA	Illumina NovaSeq 6000	Vas Deferens	Vas Deferens	Male Reproductive System	True	Vas Deferens	Male Reproductive System	Brown Swiss	Male
SAMEA113601311	Bos taurus	PAIRED	Unknown	Unknown	Male	ILLUMINA	Illumina NovaSeq 6000	Vas Deferens	Vas Deferens	Male Reproductive System	True	Vas Deferens	Male Reproductive System	Original Braunvieh	Male
SAMEA113601312	Bos taurus	PAIRED	Unknown	Unknown	Male	ILLUMINA	Illumina NovaSeq 6000	Vas Deferens	Vas Deferens	Male Reproductive System	True	Vas Deferens	Male Reproductive System	Original Braunvieh	Male
SAMEA113601313	Bos taurus	PAIRED	Unknown	Unknown	Male	ILLUMINA	Illumina NovaSeq 6000	Vas Deferens	Vas Deferens	Male Reproductive System	True	Vas Deferens	Male Reproductive System	Limousin	Male
SAMEA113601314	Bos taurus	PAIRED	Unknown	Unknown	Male	ILLUMINA	Illumina NovaSeq 6000	Vas Deferens	Vas Deferens	Male Reproductive System	True	Vas Deferens	Male Reproductive System	Brown Swiss	Male
SAMEA113601315	Bos taurus	PAIRED	Unknown	Unknown	Male	ILLUMINA	Illumina NovaSeq 6000	Vas Deferens	Vas Deferens	Male Reproductive System	True	Vas Deferens	Male Reproductive System	Brown Swiss	Male
SAMEA113601316	Bos taurus	PAIRED	Unknown	Unknown	Male	ILLUMINA	Illumina NovaSeq 6000	Vas Deferens	Vas Deferens	Male Reproductive System	True	Vas Deferens	Male Reproductive System	Brown Swiss	Male
SAMEA113601317	Bos taurus	PAIRED	Unknown	Unknown	Male	ILLUMINA	Illumina NovaSeq 6000	Vas Deferens	Vas Deferens	Male Reproductive System	True	Vas Deferens	Male Reproductive System	Original Braunvieh	Male
SAMEA113601318	Bos taurus	PAIRED	Unknown	Unknown	Male	ILLUMINA	Illumina NovaSeq 6000	Vas Deferens	Vas Deferens	Male Reproductive System	True	Vas Deferens	Male Reproductive System	Brown Swiss	Male
SAMEA113601319	Bos taurus	PAIRED	Unknown	Unknown	Male	ILLUMINA	Illumina NovaSeq 6000	Vas Deferens	Vas Deferens	Male Reproductive System	True	Vas Deferens	Male Reproductive System	Brown Swiss	Male
SAMEA113601320	Bos taurus	PAIRED	Unknown	Unknown	Male	ILLUMINA	Illumina NovaSeq 6000	Vas Deferens	Vas Deferens	Male Reproductive System	True	Vas Deferens	Male Reproductive System	Brown Swiss	Male
SAMEA113601321	Bos taurus	PAIRED	Unknown	Unknown	Male	ILLUMINA	Illumina NovaSeq 6000	Vas Deferens	Vas Deferens	Male Reproductive System	True	Vas Deferens	Male Reproductive System	Brown Swiss	Male
SAMEA113601322	Bos taurus	PAIRED	Unknown	Unknown	Male	ILLUMINA	Illumina NovaSeq 6000	Vas Deferens	Vas Deferens	Male Reproductive System	True	Vas Deferens	Male Reproductive System	Original Braunvieh	Male
SAMEA113601323	Bos taurus	PAIRED	Unknown	Unknown	Male	ILLUMINA	Illumina NovaSeq 6000	Vas Deferens	Vas Deferens	Male Reproductive System	True	Vas Deferens	Male Reproductive System	Original Braunvieh	Male
SAMEA113601324	Bos taurus	PAIRED	Unknown	Unknown	Male	ILLUMINA	Illumina NovaSeq 6000	Vas Deferens	Vas Deferens	Male Reproductive System	True	Vas Deferens	Male Reproductive System	Brown Swiss	Male
SAMEA113601325	Bos taurus	PAIRED	Unknown	Unknown	Male	ILLUMINA	Illumina NovaSeq 6000	Vas Deferens	Vas Deferens	Male Reproductive System	True	Vas Deferens	Male Reproductive System	Brown Swiss	Male
SAMEA113601326	Bos taurus	PAIRED	Unknown	Unknown	Male	ILLUMINA	Illumina NovaSeq 6000	Vas Deferens	Vas Deferens	Male Reproductive System	True	Vas Deferens	Male Reproductive System	Original Braunvieh	Male
SAMEA113601327	Bos taurus	PAIRED	Unknown	Unknown	Male	ILLUMINA	Illumina NovaSeq 6000	Vas Deferens	Vas Deferens	Male Reproductive System	True	Vas Deferens	Male Reproductive System	Original Braunvieh	Male
SAMEA113601328	Bos taurus	PAIRED	Unknown	Unknown	Male	ILLUMINA	Illumina NovaSeq 6000	Vas Deferens	Vas Deferens	Male Reproductive System	True	Vas Deferens	Male Reproductive System	Brown Swiss	Male
SAMEA113601329	Bos taurus	PAIRED	Unknown	Unknown	Male	ILLUMINA	Illumina NovaSeq 6000	Vas Deferens	Vas Deferens	Male Reproductive System	True	Vas Deferens	Male Reproductive System	Brown Swiss	Male
SAMEA113601330	Bos taurus	PAIRED	Unknown	Unknown	Male	ILLUMINA	Illumina NovaSeq 6000	Vas Deferens	Vas Deferens	Male Reproductive System	Failed	Vas Deferens	Male Reproductive System	Unknown	Male
SAMEA113601331	Bos taurus	PAIRED	Unknown	Unknown	Male	ILLUMINA	Illumina NovaSeq 6000	Vas Deferens	Vas Deferens	Male Reproductive System	True	Vas Deferens	Male Reproductive System	Brown Swiss	Male
SAMEA113601332	Bos taurus	PAIRED	Unknown	Unknown	Male	ILLUMINA	Illumina NovaSeq 6000	Vas Deferens	Vas Deferens	Male Reproductive System	True	Vas Deferens	Male Reproductive System	Brown Swiss	Male
SAMEA113601333	Bos taurus	PAIRED	Unknown	Unknown	Male	ILLUMINA	Illumina NovaSeq 6000	Vas Deferens	Vas Deferens	Male Reproductive System	True	Vas Deferens	Male Reproductive System	Brown Swiss	Male
SAMEA113601334	Bos taurus	PAIRED	Unknown	Unknown	Male	ILLUMINA	Illumina NovaSeq 6000	Vas Deferens	Vas Deferens	Male Reproductive System	True	Vas Deferens	Male Reproductive System	Original Braunvieh	Male
SAMEA113601335	Bos taurus	PAIRED	Unknown	Unknown	Male	ILLUMINA	Illumina NovaSeq 6000	Vas Deferens	Vas Deferens	Male Reproductive System	True	Vas Deferens	Male Reproductive System	Brown Swiss	Male
SAMEA113601336	Bos taurus	PAIRED	Unknown	Unknown	Male	ILLUMINA	Illumina NovaSeq 6000	Vas Deferens	Vas Deferens	Male Reproductive System	True	Vas Deferens	Male Reproductive System	Brown Swiss	Male
SAMEA113601337	Bos taurus	PAIRED	Unknown	Unknown	Male	ILLUMINA	Illumina NovaSeq 6000	Vas Deferens	Vas Deferens	Male Reproductive System	True	Vas Deferens	Male Reproductive System	Original Braunvieh	Male
SAMEA113601338	Bos taurus	PAIRED	Unknown	Unknown	Male	ILLUMINA	Illumina NovaSeq 6000	Vas Deferens	Vas Deferens	Male Reproductive System	True	Vas Deferens	Male Reproductive System	Holstein	Male
SAMEA113601339	Bos taurus	PAIRED	Unknown	Unknown	Male	ILLUMINA	Illumina NovaSeq 6000	Vas Deferens	Vas Deferens	Male Reproductive System	True	Vas Deferens	Male Reproductive System	Brown Swiss	Male
SAMEA113601340	Bos taurus	PAIRED	Unknown	Unknown	Male	ILLUMINA	Illumina NovaSeq 6000	Vas Deferens	Vas Deferens	Male Reproductive System	True	Vas Deferens	Male Reproductive System	Brown Swiss	Male
SAMEA113601341	Bos taurus	PAIRED	Unknown	Unknown	Male	ILLUMINA	Illumina NovaSeq 6000	Vas Deferens	Vas Deferens	Male Reproductive System	True	Vas Deferens	Male Reproductive System	Brown Swiss	Male
SAMEA113601342	Bos taurus	PAIRED	Unknown	Unknown	Male	ILLUMINA	Illumina NovaSeq 6000	Vas Deferens	Vas Deferens	Male Reproductive System	True	Vas Deferens	Male Reproductive System	Holstein	Male
SAMEA113601343	Bos taurus	PAIRED	Unknown	Unknown	Male	ILLUMINA	Illumina NovaSeq 6000	Vas Deferens	Vas Deferens	Male Reproductive System	True	Vas Deferens	Male Reproductive System	Brown Swiss	Male
SAMEA113601344	Bos taurus	PAIRED	Unknown	Unknown	Male	ILLUMINA	Illumina NovaSeq 6000	Vas Deferens	Vas Deferens	Male Reproductive System	True	Vas Deferens	Male Reproductive System	Brown Swiss	Male
SAMEA113601345	Bos taurus	PAIRED	Unknown	Unknown	Male	ILLUMINA	Illumina NovaSeq 6000	Vas Deferens	Vas Deferens	Male Reproductive System	True	Vas Deferens	Male Reproductive System	Holstein	Male
SAMEA113601346	Bos taurus	PAIRED	Unknown	Unknown	Male	ILLUMINA	Illumina NovaSeq 6000	Vas Deferens	Vas Deferens	Male Reproductive System	True	Vas Deferens	Male Reproductive System	Brown Swiss	Male
SAMEA113601347	Bos taurus	PAIRED	Unknown	Unknown	Male	ILLUMINA	Illumina NovaSeq 6000	Vas Deferens	Vas Deferens	Male Reproductive System	True	Vas Deferens	Male Reproductive System	Original Braunvieh	Male
SAMEA113601348	Bos taurus	PAIRED	Unknown	Unknown	Male	ILLUMINA	Illumina NovaSeq 6000	Vas Deferens	Vas Deferens	Male Reproductive System	True	Vas Deferens	Male Reproductive System	Original Braunvieh	Male
SAMEA113601349	Bos taurus	PAIRED	Unknown	Unknown	Male	ILLUMINA	Illumina NovaSeq 6000	Vas Deferens	Vas Deferens	Male Reproductive System	True	Vas Deferens	Male Reproductive System	Holstein	Male
SAMEA113601350	Bos taurus	PAIRED	Unknown	Unknown	Male	ILLUMINA	Illumina NovaSeq 6000	Vas Deferens	Vas Deferens	Male Reproductive System	True	Vas Deferens	Male Reproductive System	Original Braunvieh	Male
SAMEA113601351	Bos taurus	PAIRED	Unknown	Unknown	Male	ILLUMINA	Illumina NovaSeq 6000	Vas Deferens	Vas Deferens	Male Reproductive System	True	Vas Deferens	Male Reproductive System	Brown Swiss	Male
SAMEA113601352	Bos taurus	PAIRED	Unknown	Unknown	Male	ILLUMINA	Illumina NovaSeq 6000	Vas Deferens	Vas Deferens	Male Reproductive System	True	Vas Deferens	Male Reproductive System	Brown Swiss	Male
SAMEA113601353	Bos taurus	PAIRED	Unknown	Unknown	Male	ILLUMINA	Illumina NovaSeq 6000	Vas Deferens	Vas Deferens	Male Reproductive System	True	Vas Deferens	Male Reproductive System	Original Braunvieh	Male
SAMEA113601354	Bos taurus	PAIRED	Unknown	Unknown	Male	ILLUMINA	Illumina NovaSeq 6000	Vas Deferens	Vas Deferens	Male Reproductive System	True	Vas Deferens	Male Reproductive System	Original Braunvieh	Male
SAMEA113601355	Bos taurus	PAIRED	Unknown	Unknown	Male	ILLUMINA	Illumina NovaSeq 6000	Vas Deferens	Vas Deferens	Male Reproductive System	True	Vas Deferens	Male Reproductive System	Brown Swiss	Male
SAMEA113601356	Bos taurus	PAIRED	Unknown	Unknown	Male	ILLUMINA	Illumina NovaSeq 6000	Vas Deferens	Vas Deferens	Male Reproductive System	True	Vas Deferens	Male Reproductive System	Original Braunvieh	Male
SAMEA113601357	Bos taurus	PAIRED	Unknown	Unknown	Male	ILLUMINA	Illumina NovaSeq 6000	Vas Deferens	Vas Deferens	Male Reproductive System	True	Vas Deferens	Male Reproductive System	Original Braunvieh	Male
SAMEA113601358	Bos taurus	PAIRED	Unknown	Unknown	Male	ILLUMINA	Illumina NovaSeq 6000	Vas Deferens	Vas Deferens	Male Reproductive System	True	Vas Deferens	Male Reproductive System	Brown Swiss	Male
SAMEA113601359	Bos taurus	PAIRED	Unknown	Unknown	Male	ILLUMINA	Illumina NovaSeq 6000	Vas Deferens	Vas Deferens	Male Reproductive System	True	Vas Deferens	Male Reproductive System	Brown Swiss	Male
SAMEA113601360	Bos taurus	PAIRED	Unknown	Unknown	Male	ILLUMINA	Illumina NovaSeq 6000	Vas Deferens	Vas Deferens	Male Reproductive System	True	Vas Deferens	Male Reproductive System	Brown Swiss	Male
SAMEA113601361	Bos taurus	PAIRED	Unknown	Unknown	Male	ILLUMINA	Illumina NovaSeq 6000	Vas Deferens	Vas Deferens	Male Reproductive System	True	Vas Deferens	Male Reproductive System	Original Braunvieh	Male
SAMEA113601362	Bos taurus	PAIRED	Unknown	Unknown	Male	ILLUMINA	Illumina NovaSeq 6000	Vas Deferens	Vas Deferens	Male Reproductive System	True	Vas Deferens	Male Reproductive System	Brown Swiss	Male
SAMEA113601363	Bos taurus	PAIRED	Unknown	Unknown	Male	ILLUMINA	Illumina NovaSeq 6000	Vas Deferens	Vas Deferens	Male Reproductive System	True	Vas Deferens	Male Reproductive System	Original Braunvieh	Male
SAMEA113601364	Bos taurus	PAIRED	Unknown	Unknown	Male	ILLUMINA	Illumina NovaSeq 6000	Vas Deferens	Vas Deferens	Male Reproductive System	True	Vas Deferens	Male Reproductive System	Original Braunvieh	Male
SAMEA113601365	Bos taurus	PAIRED	Unknown	Unknown	Male	ILLUMINA	Illumina NovaSeq 6000	Vas Deferens	Vas Deferens	Male Reproductive System	True	Vas Deferens	Male Reproductive System	Brown Swiss	Male
SAMEA113601366	Bos taurus	PAIRED	Unknown	Unknown	Male	ILLUMINA	Illumina NovaSeq 6000	Vas Deferens	Vas Deferens	Male Reproductive System	True	Vas Deferens	Male Reproductive System	Original Braunvieh	Male
SAMEA113601367	Bos taurus	PAIRED	Unknown	Unknown	Male	ILLUMINA	Illumina NovaSeq 6000	Vas Deferens	Vas Deferens	Male Reproductive System	True	Vas Deferens	Male Reproductive System	Original Braunvieh	Male
SAMEA113601368	Bos taurus	PAIRED	Unknown	Unknown	Male	ILLUMINA	Illumina NovaSeq 6000	Vas Deferens	Vas Deferens	Male Reproductive System	True	Vas Deferens	Male Reproductive System	Brown Swiss	Male
SAMEA113601369	Bos taurus	PAIRED	Unknown	Unknown	Male	ILLUMINA	Illumina NovaSeq 6000	Vas Deferens	Vas Deferens	Male Reproductive System	True	Vas Deferens	Male Reproductive System	Brown Swiss	Male
SAMEA113601370	Bos taurus	PAIRED	Unknown	Unknown	Male	ILLUMINA	Illumina NovaSeq 6000	Vas Deferens	Vas Deferens	Male Reproductive System	True	Vas Deferens	Male Reproductive System	Original Braunvieh	Male
SAMEA113601371	Bos taurus	PAIRED	Unknown	Unknown	Male	ILLUMINA	Illumina NovaSeq 6000	Vas Deferens	Vas Deferens	Male Reproductive System	True	Vas Deferens	Male Reproductive System	Brown Swiss	Male
SAMEA113601372	Bos taurus	PAIRED	Unknown	Unknown	Male	ILLUMINA	Illumina NovaSeq 6000	Vas Deferens	Vas Deferens	Male Reproductive System	True	Vas Deferens	Male Reproductive System	Brown Swiss	Male
SAMEA113601373	Bos taurus	PAIRED	Unknown	Unknown	Male	ILLUMINA	Illumina NovaSeq 6000	Vas Deferens	Vas Deferens	Male Reproductive System	True	Vas Deferens	Male Reproductive System	Original Braunvieh	Male
SAMEA113601374	Bos taurus	PAIRED	Unknown	Unknown	Male	ILLUMINA	Illumina NovaSeq 6000	Vas Deferens	Vas Deferens	Male Reproductive System	True	Vas Deferens	Male Reproductive System	Original Braunvieh	Male
SAMEA113601375	Bos taurus	PAIRED	Unknown	Unknown	Male	ILLUMINA	Illumina NovaSeq 6000	Vas Deferens	Vas Deferens	Male Reproductive System	True	Vas Deferens	Male Reproductive System	Brown Swiss	Male
SAMEA113601376	Bos taurus	PAIRED	Unknown	Unknown	Male	ILLUMINA	Illumina NovaSeq 6000	Vas Deferens	Vas Deferens	Male Reproductive System	True	Vas Deferens	Male Reproductive System	Brown Swiss	Male
SAMEA113601377	Bos taurus	PAIRED	Unknown	Unknown	Male	ILLUMINA	Illumina NovaSeq 6000	Vas Deferens	Vas Deferens	Male Reproductive System	True	Vas Deferens	Male Reproductive System	Brown Swiss	Male
SAMEA113601378	Bos taurus	PAIRED	Unknown	Unknown	Male	ILLUMINA	Illumina NovaSeq 6000	Vas Deferens	Vas Deferens	Male Reproductive System	True	Vas Deferens	Male Reproductive System	Original Braunvieh	Male
SAMEA113601379	Bos taurus	PAIRED	Unknown	Unknown	Male	ILLUMINA	Illumina NovaSeq 6000	Vas Deferens	Vas Deferens	Male Reproductive System	True	Vas Deferens	Male Reproductive System	Brown Swiss	Male
SAMEA113601380	Bos taurus	PAIRED	Unknown	Unknown	Male	ILLUMINA	Illumina NovaSeq 6000	Vas Deferens	Vas Deferens	Male Reproductive System	True	Vas Deferens	Male Reproductive System	Original Braunvieh	Male
SAMEA113601381	Bos taurus	PAIRED	Unknown	Unknown	Male	ILLUMINA	Illumina NovaSeq 6000	Vas Deferens	Vas Deferens	Male Reproductive System	True	Vas Deferens	Male Reproductive System	Original Braunvieh	Male
SAMEA114111477	Bos indicus	SINGLE	Unknown	Unknown	Unknown	ILLUMINA	Illumina HiSeq 2500	Muscle	Muscle	Muscular System	False	Embryo	Embryo	Nelore	Female
SAMEA114111478	Bos indicus	SINGLE	Unknown	Unknown	Unknown	ILLUMINA	Illumina HiSeq 2500	Muscle	Muscle	Muscular System	False	Embryo	Embryo	Nelore	Male
SAMEA114111479	Bos indicus	SINGLE	Unknown	Unknown	Unknown	ILLUMINA	Illumina HiSeq 2500	Muscle	Muscle	Muscular System	False	Embryo	Embryo	Nelore	Female
SAMEA114111480	Bos indicus	SINGLE	Unknown	Unknown	Unknown	ILLUMINA	Illumina HiSeq 2500	Muscle	Muscle	Muscular System	False	Embryo	Embryo	Nelore	Male
SAMEA13451886	Bos taurus	PAIRED	Unknown	Unknown	Unknown	ILLUMINA	Illumina NovaSeq 6000	PBMC	Monocyte	Immune System	Low_quality	Monocyte	Immune System	Unknown	Unknown
SAMEA13451887	Bos taurus	PAIRED	Unknown	Unknown	Unknown	ILLUMINA	Illumina NovaSeq 6000	PBMC	Monocyte	Immune System	Low_quality	Monocyte	Immune System	Unknown	Unknown
SAMEA13451888	Bos taurus	PAIRED	Unknown	Unknown	Unknown	ILLUMINA	Illumina NovaSeq 6000	PBMC	Monocyte	Immune System	Low_quality	Monocyte	Immune System	Unknown	Unknown
SAMEA13451889	Bos taurus	PAIRED	Unknown	Unknown	Unknown	ILLUMINA	Illumina NovaSeq 6000	PBMC	Monocyte	Immune System	Low_quality	Monocyte	Immune System	Unknown	Unknown
SAMEA13451890	Bos taurus	PAIRED	Unknown	Unknown	Unknown	ILLUMINA	Illumina NovaSeq 6000	PBMC	Monocyte	Immune System	Low_quality	Monocyte	Immune System	Unknown	Unknown
SAMEA13451891	Bos taurus	PAIRED	Unknown	Unknown	Unknown	ILLUMINA	Illumina NovaSeq 6000	PBMC	Monocyte	Immune System	Low_quality	Monocyte	Immune System	Unknown	Unknown
SAMEA13451892	Bos taurus	PAIRED	Unknown	Unknown	Unknown	ILLUMINA	Illumina NovaSeq 6000	PBMC	Monocyte	Immune System	Low_quality	Monocyte	Immune System	Unknown	Unknown
SAMEA13451893	Bos taurus	PAIRED	Unknown	Unknown	Unknown	ILLUMINA	Illumina NovaSeq 6000	PBMC	Monocyte	Immune System	Low_quality	Monocyte	Immune System	Unknown	Unknown
SAMEA14281268	Bos taurus	PAIRED	Unknown	Unknown	Unknown	ILLUMINA	Illumina HiSeq 2500	Muscle	Muscle	Muscular System	True	Muscle	Muscular System	Nelore	Male
SAMEA14281269	Bos taurus	PAIRED	Unknown	Unknown	Unknown	ILLUMINA	Illumina HiSeq 2500	Muscle	Muscle	Muscular System	True	Muscle	Muscular System	Nelore	Male
SAMEA14281270	Bos taurus	PAIRED	Unknown	Unknown	Unknown	ILLUMINA	Illumina HiSeq 2500	Muscle	Muscle	Muscular System	True	Muscle	Muscular System	Nelore	Male
SAMEA14281271	Bos taurus	PAIRED	Unknown	Unknown	Unknown	ILLUMINA	Illumina HiSeq 2500	Muscle	Muscle	Muscular System	True	Muscle	Muscular System	Nelore	Male
SAMEA14281272	Bos taurus	PAIRED	Unknown	Unknown	Unknown	ILLUMINA	Illumina HiSeq 2500	Muscle	Muscle	Muscular System	True	Muscle	Muscular System	Nelore	Male
SAMEA14281273	Bos taurus	PAIRED	Unknown	Unknown	Unknown	ILLUMINA	Illumina HiSeq 2500	Muscle	Muscle	Muscular System	True	Muscle	Muscular System	Nelore	Male
SAMEA14281274	Bos taurus	PAIRED	Unknown	Unknown	Unknown	ILLUMINA	Illumina HiSeq 2500	Muscle	Muscle	Muscular System	True	Muscle	Muscular System	Nelore	Male
SAMEA14281275	Bos taurus	PAIRED	Unknown	Unknown	Unknown	ILLUMINA	Illumina HiSeq 2500	Muscle	Muscle	Muscular System	True	Muscle	Muscular System	Nelore	Male
SAMEA14281276	Bos taurus	PAIRED	Unknown	Unknown	Unknown	ILLUMINA	Illumina HiSeq 2500	Muscle	Muscle	Muscular System	True	Muscle	Muscular System	Nelore	Male
SAMEA14281277	Bos taurus	PAIRED	Unknown	Unknown	Unknown	ILLUMINA	Illumina HiSeq 2500	Muscle	Muscle	Muscular System	True	Muscle	Muscular System	Nelore	Male
SAMEA14281278	Bos taurus	PAIRED	Unknown	Unknown	Unknown	ILLUMINA	Illumina HiSeq 2500	Muscle	Muscle	Muscular System	True	Muscle	Muscular System	Nelore	Male
SAMEA14281279	Bos taurus	PAIRED	Unknown	Unknown	Unknown	ILLUMINA	Illumina HiSeq 2500	Muscle	Muscle	Muscular System	True	Muscle	Muscular System	Nelore	Male
SAMEA14281280	Bos taurus	PAIRED	Unknown	Unknown	Unknown	ILLUMINA	Illumina HiSeq 2500	Muscle	Muscle	Muscular System	True	Muscle	Muscular System	Nelore	Male
SAMEA14281281	Bos taurus	PAIRED	Unknown	Unknown	Unknown	ILLUMINA	Illumina HiSeq 2500	Muscle	Muscle	Muscular System	True	Muscle	Muscular System	Nelore	Male
SAMEA14281282	Bos taurus	PAIRED	Unknown	Unknown	Unknown	ILLUMINA	Illumina HiSeq 2500	Muscle	Muscle	Muscular System	True	Muscle	Muscular System	Nelore	Male
SAMEA14368211	Bos taurus	SINGLE	Hereford	Embryonic stage	Unknown	ILLUMINA	Illumina HiSeq 2000	Muscle	Muscle	Muscular System	False	Embryo	Embryo	Hereford	Male
SAMEA14368213	Bos taurus	SINGLE	Hereford	Adult	Unknown	ILLUMINA	Illumina HiSeq 2000	Ileum	Ileum	Digestive System	True	Ileum	Digestive System	Hereford	Male
SAMEA14368215	Bos taurus	SINGLE	Hereford	Adult	Unknown	ILLUMINA	Illumina HiSeq 2000	Caecum	Large Intestine	Digestive System	True	Large Intestine	Digestive System	Hereford	Male
SAMEA14368218	Bos taurus	SINGLE	Hereford	Adult	Unknown	ILLUMINA	Illumina HiSeq 2000	Colon	Colon	Digestive System	True	Colon	Digestive System	Hereford	Male
SAMEA14368220	Bos taurus	SINGLE	Hereford	Adult	Unknown	ILLUMINA	Illumina HiSeq 2000	Gall Bladder	Gall Bladder	Digestive System	True	Gall Bladder	Digestive System	Hereford	Male
SAMEA14368223	Bos taurus	SINGLE	Hereford	Adult	Unknown	ILLUMINA	Illumina HiSeq 2000	Lymph Node	Lymph Node	Immune System	True	Lymph Node	Immune System	Hereford	Male
SAMEA14368225	Bos taurus	SINGLE	Hereford	Adult	Unknown	ILLUMINA	Illumina HiSeq 2000	Thymus	Thymus	Immune System	True	Thymus	Immune System	Hereford	Male
SAMEA14368227	Bos taurus	SINGLE	Hereford	Adult	Unknown	ILLUMINA	Illumina HiSeq 2000	Bone Marrow	Bone Marrow	Immune System	True	Bone Marrow	Immune System	Hereford	Male
SAMEA14368229	Bos taurus	SINGLE	Hereford	Adult	Unknown	ILLUMINA	Illumina HiSeq 2000	Spleen	Spleen	Immune System	True	Spleen	Immune System	Hereford	Male
SAMEA14368231	Bos taurus	SINGLE	Hereford	Adult	Unknown	ILLUMINA	Illumina HiSeq 2000	Kidney Cortex	Kidney	Urinary System	True	Kidney	Urinary System	Hereford	Female
SAMEA14368234	Bos taurus	SINGLE	Hereford	Adult	Unknown	ILLUMINA	Illumina HiSeq 2000	Gall Bladder	Gall Bladder	Digestive System	True	Gall Bladder	Digestive System	Hereford	Male
SAMEA14368236	Bos taurus	SINGLE	Hereford	Adult	Unknown	ILLUMINA	Illumina HiSeq 2000	Skin	Skin	Integumentary System	True	Skin	Integumentary System	Hereford	Male
SAMEA14368238	Bos taurus	SINGLE	Hereford	Adult	Unknown	ILLUMINA	Illumina HiSeq 2000	Frontal Cortex	CNS	Nervous System	True	CNS	Nervous System	Hereford	Male
SAMEA14368240	Bos taurus	SINGLE	Hereford	Adult	Unknown	ILLUMINA	Illumina HiSeq 2000	Cerebellum	CNS	Nervous System	True	CNS	Nervous System	Hereford	Male
SAMEA14368242	Bos taurus	SINGLE	Hereford	Adult	Unknown	ILLUMINA	Illumina HiSeq 2000	Pituitary	Pituitary	Nervous System	True	Pituitary	Nervous System	Hereford	Male
SAMEA14368243	Bos taurus	SINGLE	Hereford	Adult	Male	ILLUMINA	Illumina HiSeq 2000	Testis	Testis	Male Reproductive System	True	Testis	Male Reproductive System	Hereford	Male
SAMEA14368246	Bos taurus	SINGLE	Hereford	Adult	Male	ILLUMINA	Illumina HiSeq 2000	Caput Epididymis	Testis	Male Reproductive System	False	Epididymis	Male Reproductive System	Hereford	Male
SAMEA14368248	Bos taurus	SINGLE	Hereford	Adult	Female	ILLUMINA	Illumina HiSeq 2000	Follicle	Follicle	Female Reproductive System	True	Follicle	Female Reproductive System	Hereford	Female
SAMEA14368250	Bos taurus	SINGLE	Hereford	Adult	Female	ILLUMINA	Illumina HiSeq 2000	Ovary	Ovary	Female Reproductive System	True	Ovary	Female Reproductive System	Hereford	Female
SAMEA14368252	Bos taurus	SINGLE	Holstein	Adult	Unknown	ILLUMINA	Illumina HiSeq 2000	Mammary Gland	Mammary Gland	Mammary Gland	True	Mammary Gland	Mammary Gland	Holstein	Female
SAMEA14368253	Bos taurus	SINGLE	Hereford	Adult	Female	ILLUMINA	Illumina HiSeq 2000	Uterine Endometrium	Uterus	Female Reproductive System	True	Uterus	Female Reproductive System	Hereford	Female
SAMEA14368254	Bos taurus	SINGLE	Hereford	Adult	Female	ILLUMINA	Illumina HiSeq 2000	Uterine Myometrium	Uterus	Female Reproductive System	True	Uterus	Female Reproductive System	Hereford	Female
SAMEA14368256	Bos taurus	SINGLE	Hereford	Adult	Unknown	ILLUMINA	Illumina HiSeq 2000	Internal Tongue Muscle	Muscle	Muscular System	True	Muscle	Muscular System	Hereford	Male
SAMEA14368257	Bos taurus	SINGLE	Hereford	Adult	Unknown	ILLUMINA	Illumina HiSeq 2000	Esophagus	Esophagus	Digestive System	True	Esophagus	Digestive System	Hereford	Male
SAMEA14368258	Bos taurus	SINGLE	Hereford	Adult	Unknown	ILLUMINA	Illumina HiSeq 2000	Reticulum	Reticulum	Digestive System	True	Reticulum	Digestive System	Hereford	Male
SAMEA14368259	Bos taurus	SINGLE	Hereford	Adult	Unknown	ILLUMINA	Illumina HiSeq 2000	Rumen	Rumen	Digestive System	True	Rumen	Digestive System	Hereford	Male
SAMEA14368261	Bos taurus	SINGLE	Hereford	Adult	Unknown	ILLUMINA	Illumina HiSeq 2000	Omasum	Omasum	Digestive System	True	Omasum	Digestive System	Hereford	Male
SAMEA14368263	Bos taurus	SINGLE	Hereford	Adult	Unknown	ILLUMINA	Illumina HiSeq 2000	Abomasum	Abomasum	Digestive System	True	Abomasum	Digestive System	Hereford	Male
SAMEA14368265	Bos taurus	SINGLE	Hereford	Adult	Unknown	ILLUMINA	Illumina HiSeq 2000	Duodenum	Duodenum	Digestive System	True	Duodenum	Digestive System	Hereford	Male
SAMEA14368266	Bos taurus	SINGLE	Hereford	Adult	Unknown	ILLUMINA	Illumina HiSeq 2000	Placetal Cranucle	Placenta	Female Reproductive System	True	Placenta	Female Reproductive System	Hereford	Female
SAMEA14368268	Bos taurus	SINGLE	Hereford	Adult	Unknown	ILLUMINA	Illumina HiSeq 2000	Jejunum	Jejunum	Digestive System	True	Jejunum	Digestive System	Hereford	Male
SAMEA14368269	Bos taurus	SINGLE	Hereford	Adult	Unknown	ILLUMINA	Illumina HiSeq 2000	Ileum	Ileum	Digestive System	True	Ileum	Digestive System	Hereford	Male
SAMEA14368271	Bos taurus	SINGLE	Hereford	Adult	Unknown	ILLUMINA	Illumina HiSeq 2000	Caecum	Large Intestine	Digestive System	True	Large Intestine	Digestive System	Hereford	Male
SAMEA14368272	Bos taurus	SINGLE	Hereford	Adult	Unknown	ILLUMINA	Illumina HiSeq 2000	Colon	Colon	Digestive System	True	Colon	Digestive System	Hereford	Male
SAMEA14368276	Bos taurus	SINGLE	Hereford	Adult	Unknown	ILLUMINA	Illumina HiSeq 2000	Lymph Node	Lymph Node	Immune System	True	Lymph Node	Immune System	Hereford	Male
SAMEA14368279	Bos taurus	SINGLE	Hereford	Adult	Unknown	ILLUMINA	Illumina HiSeq 2000	Thymus	Thymus	Immune System	True	Thymus	Immune System	Hereford	Male
SAMEA14368280	Bos taurus	SINGLE	Hereford	Adult	Unknown	ILLUMINA	Illumina HiSeq 2000	Spleen	Spleen	Immune System	True	Spleen	Immune System	Hereford	Male
SAMEA14368281	Bos taurus	SINGLE	Hereford	Adult	Unknown	ILLUMINA	Illumina HiSeq 2000	Kidney Cortex	Kidney	Urinary System	True	Kidney	Urinary System	Hereford	Male
SAMEA14368283	Bos taurus	SINGLE	Hereford	Adult	Unknown	ILLUMINA	Illumina HiSeq 2000	Lung	Lung	Respiratory System	True	Lung	Respiratory System	Hereford	Male
SAMEA14368285	Bos taurus	SINGLE	Hereford	Adult	Unknown	ILLUMINA	Illumina HiSeq 2000	Skin	Skin	Integumentary System	True	Skin	Integumentary System	Hereford	Male
SAMEA14368287	Bos taurus	SINGLE	Hereford	Adult	Unknown	ILLUMINA	Illumina HiSeq 2000	Pituitary	Pituitary	Nervous System	True	Pituitary	Nervous System	Hereford	Male
SAMEA14368288	Bos taurus	SINGLE	Holstein	Adult	Unknown	ILLUMINA	Illumina HiSeq 2000	Mammary Gland	Mammary Gland	Mammary Gland	True	Mammary Gland	Mammary Gland	Holstein	Female
SAMEA14368289	Bos taurus	SINGLE	Hereford	Adult	Male	ILLUMINA	Illumina HiSeq 2000	Testis	Testis	Male Reproductive System	True	Testis	Male Reproductive System	Hereford	Male
SAMEA14368291	Bos taurus	SINGLE	Hereford	Adult	Male	ILLUMINA	Illumina HiSeq 2000	Caput Epididymis	Testis	Male Reproductive System	False	Epididymis	Male Reproductive System	Hereford	Male
SAMEA14368297	Bos taurus	SINGLE	Hereford	Adult	Unknown	ILLUMINA	Illumina HiSeq 2000	Pre-Adipocytes	Adipocyte	Adipose	False	Cell Line	Cell Line	Hereford	Male
SAMEA14368300	Bos taurus	SINGLE	Hereford	Adult	Unknown	ILLUMINA	Illumina HiSeq 2000	Pre-Adipocytes	Adipocyte	Adipose	False	Cell Line	Cell Line	Hereford	Male
SAMEA14368303	Bos taurus	SINGLE	Hereford	Adult	Unknown	ILLUMINA	Illumina HiSeq 2000	Abomasum	Abomasum	Digestive System	True	Abomasum	Digestive System	Hereford	Male
SAMEA14368304	Bos taurus	SINGLE	Hereford	Adult	Unknown	ILLUMINA	Illumina HiSeq 2000	Cerebellum	CNS	Nervous System	True	CNS	Nervous System	Hereford	Male
SAMEA14368307	Bos taurus	SINGLE	Hereford	Adult	Unknown	ILLUMINA	Illumina HiSeq 2000	Abomasum	Abomasum	Digestive System	True	Abomasum	Digestive System	Hereford	Male
SAMEA14368311	Bos taurus	SINGLE	Hereford	Adult	Unknown	ILLUMINA	Illumina HiSeq 2000	Gall Bladder	Gall Bladder	Digestive System	True	Gall Bladder	Digestive System	Hereford	Male
SAMEA14368312	Bos taurus	SINGLE	Hereford	Adult	Unknown	ILLUMINA	Illumina HiSeq 2000	Kidney	Kidney	Urinary System	True	Kidney	Urinary System	Hereford	Male
SAMEA14368315	Bos taurus	SINGLE	Hereford	Adult	Unknown	ILLUMINA	Illumina HiSeq 2000	Kidney	Kidney	Urinary System	True	Kidney	Urinary System	Hereford	Male
SAMEA14368321	Bos taurus	SINGLE	Hereford	Embryonic stage	Unknown	ILLUMINA	Illumina HiSeq 2000	Brain	CNS	Nervous System	True	CNS	Nervous System	Hereford	Male
SAMEA14368324	Bos taurus	SINGLE	Hereford	Adult	Male	ILLUMINA	Illumina HiSeq 2000	Testis	Testis	Male Reproductive System	True	Testis	Male Reproductive System	Hereford	Male
SAMEA14368328	Bos taurus	SINGLE	Hereford	Adult	Unknown	ILLUMINA	Illumina HiSeq 2000	Myoblast	Muscle	Muscular System	Low_quality	Cell Line	Cell Line	Hereford	Unknown
SAMEA14368330	Bos taurus	SINGLE	Hereford	Adult	Unknown	ILLUMINA	Illumina HiSeq 2000	Myoblast	Muscle	Muscular System	False	Cell Line	Cell Line	Hereford	Male
SAMEA14368337	Bos taurus	SINGLE	Hereford	Adult	Unknown	ILLUMINA	Illumina HiSeq 2000	Myocyte	Muscle	Muscular System	False	Cell Line	Cell Line	Hereford	Male
SAMEA14368340	Bos taurus	SINGLE	Hereford	Adult	Unknown	ILLUMINA	Illumina HiSeq 2000	Myocyte	Muscle	Muscular System	False	Cell Line	Cell Line	Hereford	Male
SAMEA14368341	Bos taurus	SINGLE	Hereford	Adult	Unknown	ILLUMINA	Illumina HiSeq 2000	Myocyte	Muscle	Muscular System	False	Cell Line	Cell Line	Hereford	Male
SAMEA14368344	Bos taurus	SINGLE	Hereford	Embryonic stage	Unknown	ILLUMINA	Illumina HiSeq 2000	Kidney	Kidney	Urinary System	False	Embryo	Embryo	Hereford	Male
SAMEA14368345	Bos taurus	SINGLE	Hereford	Adult	Unknown	ILLUMINA	Illumina HiSeq 2000	Myocyte	Muscle	Muscular System	False	Cell Line	Cell Line	Hereford	Male
SAMEA14368346	Bos taurus	SINGLE	Hereford	Adult	Unknown	ILLUMINA	Illumina HiSeq 2000	Myocyte	Muscle	Muscular System	False	Cell Line	Cell Line	Hereford	Male
SAMEA14368349	Bos taurus	SINGLE	Hereford	Adult	Unknown	ILLUMINA	Illumina HiSeq 2000	Pre-Adipocytes	Adipocyte	Adipose	False	Cell Line	Cell Line	Hereford	Male
SAMEA14368352	Bos taurus	SINGLE	Hereford	Adult	Unknown	ILLUMINA	Illumina HiSeq 2000	Pre-Adipocytes	Adipocyte	Adipose	False	Cell Line	Cell Line	Hereford	Male
SAMEA14368355	Bos taurus	SINGLE	Hereford	Embryonic stage	Unknown	ILLUMINA	Illumina HiSeq 2000	Liver	Liver	Liver	True	Liver	Liver	Hereford	Male
SAMEA14368357	Bos taurus	SINGLE	Hereford	Embryonic stage	Unknown	ILLUMINA	Illumina HiSeq 2000	Muscle	Muscle	Muscular System	False	Embryo	Embryo	Hereford	Male
SAMEA14368359	Bos taurus	SINGLE	Hereford	Embryonic stage	Unknown	ILLUMINA	Illumina HiSeq 2000	Spleen	Spleen	Immune System	False	Embryo	Embryo	Hereford	Male
SAMEA14368361	Bos taurus	SINGLE	Hereford	Embryonic stage	Unknown	ILLUMINA	Illumina HiSeq 2000	Umbilical Cord	Embryo	Embryo	True	Embryo	Embryo	Hereford	Male
SAMEA14368364	Bos taurus	SINGLE	Hereford	Adult	Unknown	ILLUMINA	Illumina HiSeq 2000	Placetal Cranucle	Placenta	Female Reproductive System	True	Placenta	Female Reproductive System	Hereford	Female
SAMEA14368366	Bos taurus	SINGLE	Holstein	Embryonic stage	Unknown	ILLUMINA	Illumina HiSeq 2000	Mammary Gland	Mammary Gland	Mammary Gland	True	Mammary Gland	Mammary Gland	Holstein	Female
SAMEA14368368	Bos taurus	SINGLE	Hereford	Embryonic stage	Unknown	ILLUMINA	Illumina HiSeq 2000	Brain	CNS	Nervous System	True	CNS	Nervous System	Hereford	Male
SAMEA14368371	Bos taurus	SINGLE	Hereford	Embryonic stage	Male	ILLUMINA	Illumina HiSeq 2000	Embryonic Gonad	Testis	Male Reproductive System	True	Testis	Male Reproductive System	Hereford	Male
SAMEA14368372	Bos taurus	SINGLE	Hereford	Embryonic stage	Male	ILLUMINA	Illumina HiSeq 2000	Embryonic Gonad	Testis	Male Reproductive System	True	Testis	Male Reproductive System	Hereford	Male
SAMEA14368374	Bos taurus	SINGLE	Hereford	Embryonic stage	Unknown	ILLUMINA	Illumina HiSeq 2000	Heart	Heart	Cardiovascular System	False	Embryo	Embryo	Hereford	Male
SAMEA14368376	Bos taurus	SINGLE	Hereford	Embryonic stage	Unknown	ILLUMINA	Illumina HiSeq 2000	Kidney	Kidney	Urinary System	False	Embryo	Embryo	Hereford	Male
SAMEA14368377	Bos taurus	SINGLE	Hereford	Embryonic stage	Unknown	ILLUMINA	Illumina HiSeq 2000	Liver	Liver	Liver	True	Liver	Liver	Hereford	Male
SAMEA14368379	Bos taurus	SINGLE	Hereford	Embryonic stage	Unknown	ILLUMINA	Illumina HiSeq 2000	Muscle	Muscle	Muscular System	False	Embryo	Embryo	Hereford	Female
SAMEA14368381	Bos taurus	SINGLE	Hereford	Embryonic stage	Unknown	ILLUMINA	Illumina HiSeq 2000	Muscle	Muscle	Muscular System	False	Embryo	Embryo	Hereford	Male
SAMEA14368384	Bos taurus	SINGLE	Hereford	Embryonic stage	Unknown	ILLUMINA	Illumina HiSeq 2000	Muscle	Muscle	Muscular System	False	Embryo	Embryo	Hereford	Male
SAMEA14368388	Bos taurus	SINGLE	Hereford	Embryonic stage	Unknown	ILLUMINA	Illumina HiSeq 2000	Umbilical Cord	Embryo	Embryo	True	Embryo	Embryo	Hereford	Male
SAMEA14368390	Bos taurus	SINGLE	Hereford	Adult	Unknown	ILLUMINA	Illumina HiSeq 2000	Placetal Cranucle	Placenta	Female Reproductive System	True	Placenta	Female Reproductive System	Hereford	Female
SAMEA14368392	Bos taurus	SINGLE	Hereford	Embryonic stage	Unknown	ILLUMINA	Illumina HiSeq 2000	Placental Cotyledon	Placenta	Female Reproductive System	True	Placenta	Female Reproductive System	Hereford	Female
SAMEA14368393	Bos taurus	SINGLE	Hereford	Embryonic stage	Unknown	ILLUMINA	Illumina HiSeq 2000	Heart	Heart	Cardiovascular System	False	Embryo	Embryo	Hereford	Male
SAMEA14368394	Bos taurus	SINGLE	Holstein	Adult	Unknown	ILLUMINA	Illumina HiSeq 2000	Mammary Gland Parenchyma	Mammary Gland	Mammary Gland	True	Mammary Gland	Mammary Gland	Holstein	Female
SAMEA14368395	Bos taurus	SINGLE	Holstein	Adult	Unknown	ILLUMINA	Illumina HiSeq 2000	Mammary Gland Parenchyma	Mammary Gland	Mammary Gland	True	Mammary Gland	Mammary Gland	Holstein	Female
SAMEA14368396	Bos taurus	SINGLE	Holstein	Adult	Unknown	ILLUMINA	Illumina HiSeq 2000	Mammary Gland Parenchyma	Mammary Gland	Mammary Gland	True	Mammary Gland	Mammary Gland	Holstein	Female
SAMEA14368397	Bos taurus	SINGLE	Holstein	Adult	Unknown	ILLUMINA	Illumina HiSeq 2000	Mammary Gland Parenchyma	Mammary Gland	Mammary Gland	True	Mammary Gland	Mammary Gland	Holstein	Female
SAMEA14368400	Bos taurus	SINGLE	Hereford	Embryonic stage	Unknown	ILLUMINA	Illumina HiSeq 2000	Brain	CNS	Nervous System	True	CNS	Nervous System	Hereford	Female
SAMEA14368402	Bos taurus	SINGLE	Hereford	Embryonic stage	Unknown	ILLUMINA	Illumina HiSeq 2000	Embryonic Gonad	Ovary	Female Reproductive System	True	Ovary	Female Reproductive System	Hereford	Female
SAMEA14368405	Bos taurus	SINGLE	Hereford	Embryonic stage	Unknown	ILLUMINA	Illumina HiSeq 2000	Heart	Heart	Cardiovascular System	False	Embryo	Embryo	Hereford	Female
SAMEA14368406	Bos taurus	SINGLE	Hereford	Embryonic stage	Unknown	ILLUMINA	Illumina HiSeq 2000	Kidney	Kidney	Urinary System	False	Embryo	Embryo	Hereford	Female
SAMEA14368408	Bos taurus	SINGLE	Hereford	Embryonic stage	Unknown	ILLUMINA	Illumina HiSeq 2000	Liver	Liver	Liver	True	Liver	Liver	Hereford	Female
SAMEA14368411	Bos taurus	SINGLE	Hereford	Embryonic stage	Unknown	ILLUMINA	Illumina HiSeq 2000	Muscle	Muscle	Muscular System	False	Embryo	Embryo	Hereford	Female
SAMEA14368412	Bos taurus	SINGLE	Hereford	Embryonic stage	Unknown	ILLUMINA	Illumina HiSeq 2000	Spleen	Spleen	Immune System	False	Embryo	Embryo	Hereford	Female
SAMEA14368414	Bos taurus	SINGLE	Hereford	Embryonic stage	Unknown	ILLUMINA	Illumina HiSeq 2000	Umbilical Cord	Embryo	Embryo	True	Embryo	Embryo	Hereford	Female
SAMEA14368417	Bos taurus	SINGLE	Hereford	Adult	Unknown	ILLUMINA	Illumina HiSeq 2000	Placetal Cranucle	Placenta	Female Reproductive System	True	Placenta	Female Reproductive System	Hereford	Female
SAMEA14368419	Bos taurus	SINGLE	Hereford	Adult	Unknown	ILLUMINA	Illumina HiSeq 2000	Placental Cotyledon	Placenta	Female Reproductive System	True	Placenta	Female Reproductive System	Hereford	Female
SAMEA14368421	Bos taurus	SINGLE	Holstein	Adult	Unknown	ILLUMINA	Illumina HiSeq 2000	Mammary Gland	Mammary Gland	Mammary Gland	True	Mammary Gland	Mammary Gland	Holstein	Female
SAMEA14368422	Bos taurus	SINGLE	Holstein	Adult	Unknown	ILLUMINA	Illumina HiSeq 2000	Mammary Gland	Mammary Gland	Mammary Gland	True	Mammary Gland	Mammary Gland	Holstein	Female
SAMEA14368423	Bos taurus	SINGLE	Holstein	Adult	Unknown	ILLUMINA	Illumina HiSeq 2000	Mammary Gland	Mammary Gland	Mammary Gland	True	Mammary Gland	Mammary Gland	Holstein	Female
SAMEA14368425	Bos taurus	SINGLE	Hereford	Adult	Unknown	ILLUMINA	Illumina HiSeq 2000	Adipocyte	Adipocyte	Adipose	False	Cell Line	Cell Line	Hereford	Male
SAMEA14368427	Bos taurus	SINGLE	Hereford	Adult	Unknown	ILLUMINA	Illumina HiSeq 2000	Internal Tongue Muscle	Muscle	Muscular System	True	Muscle	Muscular System	Hereford	Male
SAMEA14368428	Bos taurus	SINGLE	Hereford	Adult	Unknown	ILLUMINA	Illumina HiSeq 2000	Reticulum	Reticulum	Digestive System	True	Reticulum	Digestive System	Hereford	Male
SAMEA14368430	Bos taurus	SINGLE	Hereford	Adult	Unknown	ILLUMINA	Illumina HiSeq 2000	Rumen	Rumen	Digestive System	True	Rumen	Digestive System	Hereford	Male
SAMEA14368432	Bos taurus	SINGLE	Hereford	Adult	Unknown	ILLUMINA	Illumina HiSeq 2000	Omasum	Omasum	Digestive System	True	Omasum	Digestive System	Hereford	Male
SAMEA14368433	Bos taurus	SINGLE	Hereford	Adult	Unknown	ILLUMINA	Illumina HiSeq 2000	Abomasum	Abomasum	Digestive System	True	Abomasum	Digestive System	Hereford	Male
SAMEA14368435	Bos taurus	SINGLE	Hereford	Adult	Unknown	ILLUMINA	Illumina HiSeq 2000	Duodenum	Duodenum	Digestive System	True	Duodenum	Digestive System	Hereford	Male
SAMEA2047900	Bos taurus	PAIRED	Limousin	Unknown	Male	ILLUMINA	Illumina HiSeq 2000	Longissimus Thoraci Muscle	Muscle	Muscular System	True	Muscle	Muscular System	Limousin	Male
SAMEA2047901	Bos taurus	PAIRED	Limousin	Unknown	Male	ILLUMINA	Illumina HiSeq 2000	Longissimus Thoraci Muscle	Muscle	Muscular System	True	Muscle	Muscular System	Limousin	Male
SAMEA2047902	Bos taurus	PAIRED	Limousin	Unknown	Male	ILLUMINA	Illumina HiSeq 2000	Longissimus Thoraci Muscle	Muscle	Muscular System	True	Muscle	Muscular System	Limousin	Male
SAMEA2582698	Bos taurus	SINGLE	Unknown	Unknown	Male	ILLUMINA	Illumina Genome Analyzer II	Hypothalamus	Hypothalamus	Nervous System	True	Hypothalamus	Nervous System	Holstein	Male
SAMEA2582699	Bos taurus	SINGLE	Unknown	Unknown	Male	ILLUMINA	Illumina Genome Analyzer II	Lung	Lung	Respiratory System	True	Lung	Respiratory System	Hereford	Male
SAMEA2582700	Bos taurus	PAIRED	Unknown	Unknown	Male	ILLUMINA	Illumina Genome Analyzer II	Muscle	Muscle	Muscular System	True	Muscle	Muscular System	Holstein	Male
SAMEA2582701	Bos taurus	SINGLE	Unknown	Unknown	Male	ILLUMINA	Illumina Genome Analyzer II	Adipose	Adipose	Adipose	True	Adipose	Adipose	Hereford	Male
SAMEA2582702	Bos taurus	SINGLE	Unknown	Unknown	Male	ILLUMINA	Illumina Genome Analyzer II	Duodenum	Duodenum	Digestive System	False	Muscle	Muscular System	Holstein	Male
SAMEA2582703	Bos taurus	PAIRED	Unknown	Unknown	Male	ILLUMINA	Illumina Genome Analyzer II	Liver	Liver	Liver	True	Liver	Liver	Holstein	Male
SAMEA2582704	Bos taurus	SINGLE	Unknown	Unknown	Male	ILLUMINA	Illumina Genome Analyzer II	Kidney	Kidney	Urinary System	True	Kidney	Urinary System	Angus	Male
SAMEA2587593	Bos taurus	PAIRED	Unknown	Unknown	Male	ILLUMINA	Illumina HiSeq 2000	Muscle	Muscle	Muscular System	True	Muscle	Muscular System	Limousin	Male
SAMEA2587594	Bos taurus	PAIRED	Unknown	Unknown	Male	ILLUMINA	Illumina HiSeq 2000	Muscle	Muscle	Muscular System	True	Muscle	Muscular System	Limousin	Male
SAMEA2587595	Bos taurus	PAIRED	Unknown	Unknown	Male	ILLUMINA	Illumina HiSeq 2000	Muscle	Muscle	Muscular System	True	Muscle	Muscular System	Limousin	Male
SAMEA2587596	Bos taurus	PAIRED	Unknown	Unknown	Male	ILLUMINA	Illumina HiSeq 2000	Muscle	Muscle	Muscular System	True	Muscle	Muscular System	Limousin	Male
SAMEA2587597	Bos taurus	PAIRED	Unknown	Unknown	Male	ILLUMINA	Illumina HiSeq 2000	Muscle	Muscle	Muscular System	True	Muscle	Muscular System	Limousin	Male
SAMEA2587598	Bos taurus	PAIRED	Unknown	Unknown	Male	ILLUMINA	Illumina HiSeq 2000	Muscle	Muscle	Muscular System	True	Muscle	Muscular System	Limousin	Male
SAMEA2646392	Bos indicus	PAIRED	Unknown	Unknown	Male	ILLUMINA	Illumina HiScanSQ	Muscle	Muscle	Muscular System	True	Muscle	Muscular System	Nelore	Male
SAMEA2646393	Bos indicus	PAIRED	Unknown	Unknown	Male	ILLUMINA	Illumina HiScanSQ	Longissimus dorsi muscle	Muscle	Muscular System	Low_quality	Muscle	Muscular System	Unknown	Male
SAMEA2646394	Bos indicus	PAIRED	Unknown	Unknown	Male	ILLUMINA	Illumina HiScanSQ	Longissimus dorsi muscle	Muscle	Muscular System	Low_quality	Muscle	Muscular System	Unknown	Male
SAMEA2646395	Bos indicus	PAIRED	Unknown	Unknown	Male	ILLUMINA	Illumina HiScanSQ	Muscle	Muscle	Muscular System	Low_quality	Muscle	Muscular System	Unknown	Male
SAMEA2646396	Bos indicus	PAIRED	Unknown	Unknown	Male	ILLUMINA	Illumina HiScanSQ	Muscle	Muscle	Muscular System	Low_quality	Muscle	Muscular System	Unknown	Male
SAMEA2646397	Bos indicus	PAIRED	Unknown	Unknown	Male	ILLUMINA	Illumina HiScanSQ	Muscle	Muscle	Muscular System	Low_quality	Muscle	Muscular System	Unknown	Male
SAMEA2646398	Bos indicus	PAIRED	Unknown	Unknown	Male	ILLUMINA	Illumina HiScanSQ	Muscle	Muscle	Muscular System	Low_quality	Muscle	Muscular System	Unknown	Male
SAMEA2646399	Bos indicus	PAIRED	Unknown	Unknown	Male	ILLUMINA	Illumina HiScanSQ	Longissimus dorsi muscle	Muscle	Muscular System	True	Muscle	Muscular System	Nelore	Male
SAMEA2646400	Bos indicus	PAIRED	Unknown	Unknown	Male	ILLUMINA	Illumina HiScanSQ	Longissimus dorsi muscle	Muscle	Muscular System	Low_quality	Muscle	Muscular System	Unknown	Male
SAMEA2646401	Bos indicus	PAIRED	Unknown	Unknown	Male	ILLUMINA	Illumina HiScanSQ	Longissimus dorsi muscle	Muscle	Muscular System	True	Muscle	Muscular System	Nelore	Male
SAMEA2646402	Bos indicus	PAIRED	Unknown	Unknown	Male	ILLUMINA	Illumina HiScanSQ	Muscle	Muscle	Muscular System	Low_quality	Muscle	Muscular System	Unknown	Male
SAMEA2646403	Bos indicus	PAIRED	Unknown	Unknown	Male	ILLUMINA	Illumina HiScanSQ	Longissimus dorsi muscle	Muscle	Muscular System	Low_quality	Muscle	Muscular System	Unknown	Male
SAMEA2646404	Bos indicus	PAIRED	Unknown	Unknown	Male	ILLUMINA	Illumina HiScanSQ	Longissimus dorsi muscle	Muscle	Muscular System	Low_quality	Muscle	Muscular System	Unknown	Male
SAMEA2646405	Bos indicus	PAIRED	Unknown	Unknown	Male	ILLUMINA	Illumina HiScanSQ	Longissimus dorsi muscle	Muscle	Muscular System	Low_quality	Muscle	Muscular System	Unknown	Male
SAMEA2707836	Bos taurus	PAIRED	Limousin	17 months	Male	ILLUMINA	Illumina HiSeq 2500	Olfactory Mucosa	Lung	Respiratory System	False	Nose	Respiratory System	Limousin	Male
SAMEA2707837	Bos taurus	PAIRED	Limousin	25 months	Male	ILLUMINA	Illumina HiSeq 2500	Olfactory Mucosa	Lung	Respiratory System	False	Nose	Respiratory System	Limousin	Male
SAMEA2707838	Bos taurus	PAIRED	Limousin	22 months	Male	ILLUMINA	Illumina HiSeq 2500	Olfactory Mucosa	Lung	Respiratory System	False	Nose	Respiratory System	Limousin	Male
SAMEA2747169	Bos taurus	SINGLE	Unknown	Unknown	Female	ILLUMINA	Illumina Genome Analyzer IIx	Mammary Gland	Mammary Gland	Mammary Gland	Low_quality	Mammary Gland	Mammary Gland	Unknown	Female
SAMEA2747170	Bos taurus	SINGLE	Unknown	Unknown	Female	ILLUMINA	Illumina Genome Analyzer IIx	Mammary Gland	Mammary Gland	Mammary Gland	Low_quality	Mammary Gland	Mammary Gland	Unknown	Female
SAMEA2747171	Bos taurus	SINGLE	Unknown	Unknown	Female	ILLUMINA	Illumina Genome Analyzer IIx	Mammary Gland	Mammary Gland	Mammary Gland	Low_quality	Mammary Gland	Mammary Gland	Unknown	Female
SAMEA2747172	Bos taurus	SINGLE	Unknown	Unknown	Female	ILLUMINA	Illumina Genome Analyzer IIx	Mammary Gland	Mammary Gland	Mammary Gland	Low_quality	Mammary Gland	Mammary Gland	Unknown	Female
SAMEA2747173	Bos taurus	SINGLE	Unknown	Unknown	Female	ILLUMINA	Illumina Genome Analyzer IIx	Mammary Gland	Mammary Gland	Mammary Gland	Low_quality	Mammary Gland	Mammary Gland	Unknown	Female
SAMEA2747174	Bos taurus	SINGLE	Unknown	Unknown	Female	ILLUMINA	Illumina Genome Analyzer IIx	Mammary Gland	Mammary Gland	Mammary Gland	Low_quality	Mammary Gland	Mammary Gland	Unknown	Female
SAMEA2747175	Bos taurus	SINGLE	Unknown	Unknown	Female	ILLUMINA	Illumina Genome Analyzer IIx	Mammary Gland	Mammary Gland	Mammary Gland	Low_quality	Mammary Gland	Mammary Gland	Unknown	Female
SAMEA2747176	Bos taurus	SINGLE	Unknown	Unknown	Female	ILLUMINA	Illumina Genome Analyzer IIx	Mammary Gland	Mammary Gland	Mammary Gland	Low_quality	Mammary Gland	Mammary Gland	Unknown	Female
SAMEA3112153	Bos indicus	PAIRED	Unknown	Unknown	Unknown	ILLUMINA	Illumina HiSeq 2000	Liver	Liver	Liver	Low_quality	Liver	Liver	Unknown	Unknown
SAMEA3112173	Bos indicus	PAIRED	Unknown	Unknown	Unknown	ILLUMINA	Illumina HiSeq 2000	Liver	Liver	Liver	Low_quality	Liver	Liver	Unknown	Unknown
SAMEA3112174	Bos indicus	PAIRED	Unknown	Unknown	Unknown	ILLUMINA	Illumina HiSeq 2000	Liver	Liver	Liver	True	Liver	Liver	Nelore	Male
SAMEA3112175	Bos indicus	PAIRED	Unknown	Unknown	Unknown	ILLUMINA	Illumina HiSeq 2000	Liver	Liver	Liver	Low_quality	Liver	Liver	Unknown	Unknown
SAMEA3112176	Bos indicus	PAIRED	Unknown	Unknown	Unknown	ILLUMINA	Illumina HiSeq 2000	Liver	Liver	Liver	Low_quality	Liver	Liver	Unknown	Unknown
SAMEA3112177	Bos indicus	PAIRED	Unknown	Unknown	Unknown	ILLUMINA	Illumina HiSeq 2000	Liver	Liver	Liver	Low_quality	Liver	Liver	Unknown	Unknown
SAMEA3112178	Bos indicus	PAIRED	Unknown	Unknown	Unknown	ILLUMINA	Illumina HiSeq 2000	Liver	Liver	Liver	Low_quality	Liver	Liver	Unknown	Unknown
SAMEA3112179	Bos indicus	PAIRED	Unknown	Unknown	Unknown	ILLUMINA	Illumina HiSeq 2000	Liver	Liver	Liver	Low_quality	Liver	Liver	Unknown	Unknown
SAMEA3112180	Bos indicus	PAIRED	Unknown	Unknown	Unknown	ILLUMINA	Illumina HiSeq 2000	Liver	Liver	Liver	Low_quality	Liver	Liver	Unknown	Unknown
SAMEA3112181	Bos indicus	PAIRED	Unknown	Unknown	Unknown	ILLUMINA	Illumina HiSeq 2000	Liver	Liver	Liver	Low_quality	Liver	Liver	Unknown	Unknown
SAMEA3112182	Bos indicus	PAIRED	Unknown	Unknown	Unknown	ILLUMINA	Illumina HiSeq 2000	Liver	Liver	Liver	Low_quality	Liver	Liver	Unknown	Unknown
SAMEA3112183	Bos indicus	PAIRED	Unknown	Unknown	Unknown	ILLUMINA	Illumina HiSeq 2000	Liver	Liver	Liver	Low_quality	Liver	Liver	Unknown	Unknown
SAMEA3112184	Bos indicus	PAIRED	Unknown	Unknown	Unknown	ILLUMINA	Illumina HiSeq 2000	Liver	Liver	Liver	Low_quality	Liver	Liver	Unknown	Unknown
SAMEA3112185	Bos indicus	PAIRED	Unknown	Unknown	Unknown	ILLUMINA	Illumina HiSeq 2000	Liver	Liver	Liver	Low_quality	Liver	Liver	Unknown	Unknown
SAMEA3112186	Bos indicus	PAIRED	Unknown	Unknown	Unknown	ILLUMINA	Illumina HiSeq 2000	Liver	Liver	Liver	True	Liver	Liver	Nelore	Female
SAMEA3112187	Bos indicus	PAIRED	Unknown	Unknown	Unknown	ILLUMINA	Illumina HiSeq 2000	Liver	Liver	Liver	Low_quality	Liver	Liver	Unknown	Unknown
SAMEA3112188	Bos indicus	PAIRED	Unknown	Unknown	Unknown	ILLUMINA	Illumina HiSeq 2000	Liver	Liver	Liver	Low_quality	Liver	Liver	Unknown	Unknown
SAMEA3112189	Bos indicus	PAIRED	Unknown	Unknown	Unknown	ILLUMINA	Illumina HiSeq 2000	Liver	Liver	Liver	Low_quality	Liver	Liver	Unknown	Unknown
SAMEA3112190	Bos indicus	PAIRED	Unknown	Unknown	Unknown	ILLUMINA	Illumina HiSeq 2000	Liver	Liver	Liver	Low_quality	Liver	Liver	Unknown	Unknown
SAMEA3112191	Bos indicus	PAIRED	Unknown	Unknown	Unknown	ILLUMINA	Illumina HiSeq 2000	Liver	Liver	Liver	Low_quality	Liver	Liver	Unknown	Unknown
SAMEA3112192	Bos indicus	PAIRED	Unknown	Unknown	Unknown	ILLUMINA	Illumina HiSeq 2000	Liver	Liver	Liver	Low_quality	Liver	Liver	Unknown	Unknown
SAMEA3170987	Bos indicus	PAIRED	Unknown	Unknown	Unknown	ILLUMINA	Illumina HiSeq 2000	Rumen	Rumen	Digestive System	Low_quality	Rumen	Digestive System	Unknown	Unknown
SAMEA3170988	Bos indicus	PAIRED	Unknown	Unknown	Unknown	ILLUMINA	Illumina HiSeq 2000	Rumen	Rumen	Digestive System	Low_quality	Rumen	Digestive System	Unknown	Unknown
SAMEA3170990	Bos indicus	PAIRED	Unknown	Unknown	Unknown	ILLUMINA	Illumina HiSeq 2000	Rumen	Rumen	Digestive System	Low_quality	Rumen	Digestive System	Unknown	Unknown
SAMEA3306037	Bos indicus	PAIRED	Unknown	Unknown	Male	ILLUMINA	Illumina HiSeq 2500	Liver	Liver	Liver	True	Liver	Liver	Nelore	Male
SAMEA3306038	Bos indicus	PAIRED	Unknown	Unknown	Male	ILLUMINA	Illumina HiSeq 2500	Liver	Liver	Liver	True	Liver	Liver	Nelore	Male
SAMEA3306039	Bos indicus	PAIRED	Unknown	Unknown	Male	ILLUMINA	Illumina HiSeq 2500	Liver	Liver	Liver	True	Liver	Liver	Nelore	Male
SAMEA3306040	Bos indicus	PAIRED	Unknown	Unknown	Male	ILLUMINA	Illumina HiSeq 2500	Liver	Liver	Liver	True	Liver	Liver	Nelore	Male
SAMEA3306041	Bos indicus	PAIRED	Unknown	Unknown	Male	ILLUMINA	Illumina HiSeq 2500	Liver	Liver	Liver	True	Liver	Liver	Nelore	Male
SAMEA3306042	Bos indicus	PAIRED	Unknown	Unknown	Male	ILLUMINA	Illumina HiSeq 2500	Liver	Liver	Liver	True	Liver	Liver	Nelore	Male
SAMEA3306043	Bos indicus	PAIRED	Unknown	Unknown	Male	ILLUMINA	Illumina HiSeq 2500	Liver	Liver	Liver	Failed	Liver	Liver	Unknown	Male
SAMEA3306044	Bos indicus	PAIRED	Unknown	Unknown	Male	ILLUMINA	Illumina HiSeq 2500	Liver	Liver	Liver	True	Liver	Liver	Nelore	Male
SAMEA3306045	Bos indicus	PAIRED	Unknown	Unknown	Male	ILLUMINA	Illumina HiSeq 2500	Liver	Liver	Liver	True	Liver	Liver	Nelore	Male
SAMEA3306046	Bos indicus	PAIRED	Unknown	Unknown	Male	ILLUMINA	Illumina HiSeq 2500	Liver	Liver	Liver	True	Liver	Liver	Nelore	Male
SAMEA3306047	Bos indicus	PAIRED	Unknown	Unknown	Male	ILLUMINA	Illumina HiSeq 2500	Liver	Liver	Liver	True	Liver	Liver	Nelore	Male
SAMEA3306048	Bos indicus	PAIRED	Unknown	Unknown	Male	ILLUMINA	Illumina HiSeq 2500	Liver	Liver	Liver	True	Liver	Liver	Nelore	Male
SAMEA3306049	Bos indicus	PAIRED	Unknown	Unknown	Male	ILLUMINA	Illumina HiSeq 2500	Liver	Liver	Liver	True	Liver	Liver	Nelore	Male
SAMEA3306050	Bos indicus	PAIRED	Unknown	Unknown	Male	ILLUMINA	Illumina HiSeq 2500	Liver	Liver	Liver	True	Liver	Liver	Nelore	Male
SAMEA3306051	Bos indicus	PAIRED	Unknown	Unknown	Male	ILLUMINA	Illumina HiSeq 2500	Liver	Liver	Liver	True	Liver	Liver	Nelore	Male
SAMEA3308496	Bos indicus	PAIRED	Unknown	Unknown	Male	ILLUMINA	Illumina HiSeq 2500	Liver	Liver	Liver	True	Liver	Liver	Nelore	Male
SAMEA3334636	Bos taurus	SINGLE	Unknown	Unknown	Unknown	ILLUMINA	Illumina MiSeq	Primary Cell	Primary Cell	Other	False	Cell Line	Cell Line	Angus	Male
SAMEA3334637	Bos taurus	SINGLE	Unknown	Unknown	Unknown	ILLUMINA	Illumina MiSeq	Primary Cell	Primary Cell	Other	False	Cell Line	Cell Line	Angus	Male
SAMEA3334638	Bos taurus	SINGLE	Unknown	Unknown	Unknown	ILLUMINA	Illumina MiSeq	Primary Cell	Primary Cell	Other	False	Cell Line	Cell Line	Angus	Male
SAMEA3334639	Bos taurus	SINGLE	Unknown	Unknown	Unknown	ILLUMINA	Illumina MiSeq	Primary Cell	Primary Cell	Other	False	Cell Line	Cell Line	Angus	Male
SAMEA3334640	Bos taurus	SINGLE	Unknown	Unknown	Unknown	ILLUMINA	Illumina MiSeq	Primary Cell	Primary Cell	Other	False	Cell Line	Cell Line	Angus	Male
SAMEA3682661	Bos taurus	PAIRED	Holstein	Unknown	Unknown	ILLUMINA	Illumina HiSeq 2500	Liver	Liver	Liver	True	Liver	Liver	Holstein	Male
SAMEA3888733	Bos taurus	PAIRED	Unknown	Unknown	Unknown	ILLUMINA	Illumina Genome Analyzer IIx	Blood	Blood	Immune System	Low_quality	Blood	Immune System	Unknown	Unknown
SAMEA3888734	Bos taurus	PAIRED	Unknown	Unknown	Unknown	ILLUMINA	Illumina Genome Analyzer IIx	Blood	Blood	Immune System	Low_quality	Blood	Immune System	Unknown	Unknown
SAMEA3888735	Bos taurus	PAIRED	Unknown	Unknown	Unknown	ILLUMINA	Illumina Genome Analyzer IIx	Blood	Blood	Immune System	Low_quality	Blood	Immune System	Unknown	Unknown
SAMEA3888736	Bos taurus	PAIRED	Unknown	Unknown	Unknown	ILLUMINA	Illumina Genome Analyzer IIx	Blood	Blood	Immune System	Low_quality	Blood	Immune System	Unknown	Unknown
SAMEA3888737	Bos taurus	PAIRED	Unknown	Unknown	Unknown	ILLUMINA	Illumina Genome Analyzer IIx	Blood	Blood	Immune System	Low_quality	Blood	Immune System	Unknown	Unknown
SAMEA3888738	Bos taurus	PAIRED	Unknown	Unknown	Unknown	ILLUMINA	Illumina Genome Analyzer IIx	Blood	Blood	Immune System	Low_quality	Blood	Immune System	Unknown	Unknown
SAMEA3888739	Bos taurus	PAIRED	Unknown	Unknown	Unknown	ILLUMINA	Illumina Genome Analyzer IIx	Blood	Blood	Immune System	Low_quality	Blood	Immune System	Unknown	Unknown
SAMEA3888740	Bos taurus	PAIRED	Unknown	Unknown	Unknown	ILLUMINA	Illumina Genome Analyzer IIx	Blood	Blood	Immune System	Low_quality	Blood	Immune System	Unknown	Unknown
SAMEA3888741	Bos taurus	PAIRED	Unknown	Unknown	Unknown	ILLUMINA	Illumina Genome Analyzer IIx	Blood	Blood	Immune System	Low_quality	Blood	Immune System	Unknown	Unknown
SAMEA3888742	Bos taurus	PAIRED	Unknown	Unknown	Unknown	ILLUMINA	Illumina Genome Analyzer IIx	Blood	Blood	Immune System	Low_quality	Blood	Immune System	Unknown	Unknown
SAMEA3888743	Bos taurus	PAIRED	Unknown	Unknown	Unknown	ILLUMINA	Illumina Genome Analyzer IIx	Blood	Blood	Immune System	Low_quality	Blood	Immune System	Unknown	Unknown
SAMEA3888744	Bos taurus	PAIRED	Unknown	Unknown	Unknown	ILLUMINA	Illumina Genome Analyzer IIx	Blood	Blood	Immune System	Low_quality	Blood	Immune System	Unknown	Unknown
SAMEA3903350	Bos taurus	PAIRED	Unknown	Adult	Male	ILLUMINA	Illumina HiSeq 2000	Liver	Liver	Liver	True	Liver	Liver	Limousin	Male
SAMEA3903351	Bos taurus	PAIRED	Unknown	Adult	Male	ILLUMINA	Illumina HiSeq 2000	Liver	Liver	Liver	True	Liver	Liver	Limousin	Male
SAMEA3903352	Bos taurus	PAIRED	Unknown	Adult	Male	ILLUMINA	Illumina HiSeq 2000	Liver	Liver	Liver	True	Liver	Liver	Limousin	Male
SAMEA3903378	Bos taurus	PAIRED	Unknown	Adult	Male	ILLUMINA	Illumina HiSeq 2000	Liver	Liver	Liver	True	Liver	Liver	Limousin	Male
SAMEA3931975	Bos taurus	PAIRED	Unknown	Unknown	Male	ILLUMINA	Illumina HiSeq 2000	Muscle	Muscle	Muscular System	True	Muscle	Muscular System	Limousin	Male
SAMEA3931976	Bos taurus	PAIRED	Unknown	Unknown	Male	ILLUMINA	Illumina HiSeq 2000	Muscle	Muscle	Muscular System	True	Muscle	Muscular System	Limousin	Male
SAMEA3931977	Bos taurus	PAIRED	Unknown	Unknown	Male	ILLUMINA	Illumina HiSeq 2000	Muscle	Muscle	Muscular System	True	Muscle	Muscular System	Limousin	Male
SAMEA3931978	Bos taurus	PAIRED	Unknown	Unknown	Male	ILLUMINA	Illumina HiSeq 2000	Muscle	Muscle	Muscular System	True	Muscle	Muscular System	Limousin	Male
SAMEA3931979	Bos taurus	PAIRED	Unknown	Unknown	Male	ILLUMINA	Illumina HiSeq 2000	Muscle	Muscle	Muscular System	True	Muscle	Muscular System	Limousin	Male
SAMEA3931980	Bos taurus	PAIRED	Unknown	Unknown	Male	ILLUMINA	Illumina HiSeq 2000	Muscle	Muscle	Muscular System	True	Muscle	Muscular System	Limousin	Male
SAMEA3931981	Bos taurus	PAIRED	Unknown	Unknown	Male	ILLUMINA	Illumina HiSeq 2000	Muscle	Muscle	Muscular System	True	Muscle	Muscular System	Limousin	Male
SAMEA3931982	Bos taurus	PAIRED	Unknown	Unknown	Male	ILLUMINA	Illumina HiSeq 2000	Muscle	Muscle	Muscular System	True	Muscle	Muscular System	Limousin	Male
SAMEA4051551	Bos taurus	PAIRED	Unknown	Unknown	Unknown	ILLUMINA	Illumina HiSeq 2500	Skin	Skin	Integumentary System	True	Skin	Integumentary System	Holstein	Female
SAMEA4051552	Bos taurus	PAIRED	Unknown	Unknown	Unknown	ILLUMINA	Illumina HiSeq 2500	Skin	Skin	Integumentary System	True	Skin	Integumentary System	Original Braunvieh	Female
SAMEA4051553	Bos taurus	PAIRED	Unknown	Unknown	Unknown	ILLUMINA	Illumina HiSeq 2500	Skin	Skin	Integumentary System	True	Skin	Integumentary System	Original Braunvieh	Female
SAMEA4051554	Bos taurus	PAIRED	Unknown	Unknown	Unknown	ILLUMINA	Illumina HiSeq 2500	Skin	Skin	Integumentary System	True	Skin	Integumentary System	Original Braunvieh	Female
SAMEA4051555	Bos taurus	PAIRED	Unknown	Unknown	Unknown	ILLUMINA	Illumina HiSeq 2500	Skin	Skin	Integumentary System	True	Skin	Integumentary System	Original Braunvieh	Female
SAMEA4051556	Bos taurus	PAIRED	Unknown	Unknown	Unknown	ILLUMINA	Illumina HiSeq 2500	Skin	Skin	Integumentary System	True	Skin	Integumentary System	Original Braunvieh	Female
SAMEA4051557	Bos taurus	PAIRED	Unknown	Unknown	Unknown	ILLUMINA	Illumina HiSeq 2500	Skin	Skin	Integumentary System	True	Skin	Integumentary System	Original Braunvieh	Female
SAMEA4395184	Bos indicus	PAIRED	Unknown	Unknown	Unknown	ILLUMINA	Illumina HiSeq 2500	Muscle	Muscle	Muscular System	True	Muscle	Muscular System	Nelore	Male
SAMEA4395185	Bos indicus	PAIRED	Unknown	Unknown	Unknown	ILLUMINA	Illumina HiSeq 2500	Muscle	Muscle	Muscular System	True	Muscle	Muscular System	Nelore	Male
SAMEA4395186	Bos indicus	PAIRED	Unknown	Unknown	Unknown	ILLUMINA	Illumina HiSeq 2500	Muscle	Muscle	Muscular System	Low_quality	Muscle	Muscular System	Unknown	Unknown
SAMEA4395187	Bos indicus	PAIRED	Unknown	Unknown	Unknown	ILLUMINA	Illumina HiSeq 2500	Muscle	Muscle	Muscular System	True	Muscle	Muscular System	Nelore	Male
SAMEA4395188	Bos indicus	PAIRED	Unknown	Unknown	Unknown	ILLUMINA	Illumina HiSeq 2500	Muscle	Muscle	Muscular System	Low_quality	Muscle	Muscular System	Unknown	Unknown
SAMEA4395189	Bos indicus	PAIRED	Unknown	Unknown	Unknown	ILLUMINA	Illumina HiSeq 2500	Muscle	Muscle	Muscular System	Low_quality	Muscle	Muscular System	Unknown	Unknown
SAMEA4395190	Bos indicus	PAIRED	Unknown	Unknown	Unknown	ILLUMINA	Illumina HiSeq 2500	Muscle	Muscle	Muscular System	True	Muscle	Muscular System	Nelore	Male
SAMEA4395191	Bos indicus	PAIRED	Unknown	Unknown	Unknown	ILLUMINA	Illumina HiSeq 2500	Muscle	Muscle	Muscular System	True	Muscle	Muscular System	Nelore	Female
SAMEA4395192	Bos indicus	PAIRED	Unknown	Unknown	Unknown	ILLUMINA	Illumina HiSeq 2500	Muscle	Muscle	Muscular System	True	Muscle	Muscular System	Nelore	Male
SAMEA4395193	Bos indicus	PAIRED	Unknown	Unknown	Unknown	ILLUMINA	Illumina HiSeq 2500	Muscle	Muscle	Muscular System	True	Muscle	Muscular System	Nelore	Male
SAMEA4395194	Bos indicus	PAIRED	Unknown	Unknown	Unknown	ILLUMINA	Illumina HiSeq 2500	Muscle	Muscle	Muscular System	Low_quality	Muscle	Muscular System	Unknown	Unknown
SAMEA4395195	Bos indicus	PAIRED	Unknown	Unknown	Unknown	ILLUMINA	Illumina HiSeq 2500	Muscle	Muscle	Muscular System	Low_quality	Muscle	Muscular System	Unknown	Unknown
SAMEA4395196	Bos indicus	PAIRED	Unknown	Unknown	Unknown	ILLUMINA	Illumina HiSeq 2500	Muscle	Muscle	Muscular System	Low_quality	Muscle	Muscular System	Unknown	Unknown
SAMEA4395197	Bos indicus	PAIRED	Unknown	Unknown	Unknown	ILLUMINA	Illumina HiSeq 2500	Muscle	Muscle	Muscular System	True	Muscle	Muscular System	Nelore	Female
SAMEA4395198	Bos indicus	PAIRED	Unknown	Unknown	Unknown	ILLUMINA	Illumina HiSeq 2500	Muscle	Muscle	Muscular System	True	Muscle	Muscular System	Nelore	Female
SAMEA4395199	Bos indicus	PAIRED	Unknown	Unknown	Unknown	ILLUMINA	Illumina HiSeq 2500	Muscle	Muscle	Muscular System	Low_quality	Muscle	Muscular System	Unknown	Unknown
SAMEA4395200	Bos indicus	PAIRED	Unknown	Unknown	Unknown	ILLUMINA	Illumina HiSeq 2500	Muscle	Muscle	Muscular System	Low_quality	Muscle	Muscular System	Unknown	Unknown
SAMEA4395201	Bos indicus	PAIRED	Unknown	Unknown	Unknown	ILLUMINA	Illumina HiSeq 2500	Muscle	Muscle	Muscular System	Low_quality	Muscle	Muscular System	Unknown	Unknown
SAMEA4395202	Bos indicus	PAIRED	Unknown	Unknown	Unknown	ILLUMINA	Illumina HiSeq 2500	Muscle	Muscle	Muscular System	True	Muscle	Muscular System	Nelore	Male
SAMEA4395203	Bos indicus	PAIRED	Unknown	Unknown	Unknown	ILLUMINA	Illumina HiSeq 2500	Muscle	Muscle	Muscular System	Low_quality	Muscle	Muscular System	Unknown	Unknown
SAMEA4395204	Bos indicus	PAIRED	Unknown	Unknown	Unknown	ILLUMINA	Illumina HiSeq 2500	Muscle	Muscle	Muscular System	Low_quality	Muscle	Muscular System	Unknown	Unknown
SAMEA4395205	Bos indicus	PAIRED	Unknown	Unknown	Unknown	ILLUMINA	Illumina HiSeq 2500	Muscle	Muscle	Muscular System	Low_quality	Muscle	Muscular System	Unknown	Unknown
SAMEA4395206	Bos indicus	PAIRED	Unknown	Unknown	Unknown	ILLUMINA	Illumina HiSeq 2500	Muscle	Muscle	Muscular System	Low_quality	Muscle	Muscular System	Unknown	Unknown
SAMEA4395207	Bos indicus	PAIRED	Unknown	Unknown	Unknown	ILLUMINA	Illumina HiSeq 2500	Muscle	Muscle	Muscular System	True	Muscle	Muscular System	Nelore	Male
SAMEA4395208	Bos indicus	PAIRED	Unknown	Unknown	Unknown	ILLUMINA	Illumina HiSeq 2500	Muscle	Muscle	Muscular System	Low_quality	Muscle	Muscular System	Unknown	Unknown
SAMEA4395209	Bos indicus	PAIRED	Unknown	Unknown	Unknown	ILLUMINA	Illumina HiSeq 2500	Muscle	Muscle	Muscular System	Low_quality	Muscle	Muscular System	Unknown	Unknown
SAMEA4395210	Bos indicus	PAIRED	Unknown	Unknown	Unknown	ILLUMINA	Illumina HiSeq 2500	Muscle	Muscle	Muscular System	Low_quality	Muscle	Muscular System	Unknown	Unknown
SAMEA4395211	Bos indicus	PAIRED	Unknown	Unknown	Unknown	ILLUMINA	Illumina HiSeq 2500	Muscle	Muscle	Muscular System	Low_quality	Muscle	Muscular System	Unknown	Unknown
SAMEA4395212	Bos indicus	PAIRED	Unknown	Unknown	Unknown	ILLUMINA	Illumina HiSeq 2500	Muscle	Muscle	Muscular System	Low_quality	Muscle	Muscular System	Unknown	Unknown
SAMEA4395213	Bos indicus	PAIRED	Unknown	Unknown	Unknown	ILLUMINA	Illumina HiSeq 2500	Muscle	Muscle	Muscular System	Low_quality	Muscle	Muscular System	Unknown	Unknown
SAMEA4395214	Bos indicus	PAIRED	Unknown	Unknown	Unknown	ILLUMINA	Illumina HiSeq 2500	Muscle	Muscle	Muscular System	Low_quality	Muscle	Muscular System	Unknown	Unknown
SAMEA4395215	Bos indicus	PAIRED	Unknown	Unknown	Unknown	ILLUMINA	Illumina HiSeq 2500	Muscle	Muscle	Muscular System	True	Muscle	Muscular System	Nelore	Male
SAMEA4395216	Bos indicus	PAIRED	Unknown	Unknown	Unknown	ILLUMINA	Illumina HiSeq 2500	Muscle	Muscle	Muscular System	Low_quality	Muscle	Muscular System	Unknown	Unknown
SAMEA4395217	Bos indicus	PAIRED	Unknown	Unknown	Unknown	ILLUMINA	Illumina HiSeq 2500	Muscle	Muscle	Muscular System	Low_quality	Muscle	Muscular System	Unknown	Unknown
SAMEA4395218	Bos indicus	PAIRED	Unknown	Unknown	Unknown	ILLUMINA	Illumina HiSeq 2500	Muscle	Muscle	Muscular System	True	Muscle	Muscular System	Nelore	Male
SAMEA4395219	Bos indicus	PAIRED	Unknown	Unknown	Unknown	ILLUMINA	Illumina HiSeq 2500	Muscle	Muscle	Muscular System	Low_quality	Muscle	Muscular System	Unknown	Unknown
SAMEA4395220	Bos indicus	PAIRED	Unknown	Unknown	Unknown	ILLUMINA	Illumina HiSeq 2500	Muscle	Muscle	Muscular System	True	Muscle	Muscular System	Nelore	Male
SAMEA4395221	Bos indicus	PAIRED	Unknown	Unknown	Unknown	ILLUMINA	Illumina HiSeq 2500	Muscle	Muscle	Muscular System	True	Muscle	Muscular System	Nelore	Male
SAMEA4395222	Bos indicus	PAIRED	Unknown	Unknown	Unknown	ILLUMINA	Illumina HiSeq 2500	Muscle	Muscle	Muscular System	True	Muscle	Muscular System	Nelore	Male
SAMEA4395223	Bos indicus	PAIRED	Unknown	Unknown	Unknown	ILLUMINA	Illumina HiSeq 2500	Muscle	Muscle	Muscular System	True	Muscle	Muscular System	Nelore	Female
SAMEA4395224	Bos indicus	PAIRED	Unknown	Unknown	Unknown	ILLUMINA	Illumina HiSeq 2500	Muscle	Muscle	Muscular System	Low_quality	Muscle	Muscular System	Unknown	Unknown
SAMEA4395225	Bos indicus	PAIRED	Unknown	Unknown	Unknown	ILLUMINA	Illumina HiSeq 2500	Muscle	Muscle	Muscular System	Low_quality	Muscle	Muscular System	Unknown	Unknown
SAMEA4395226	Bos indicus	PAIRED	Unknown	Unknown	Unknown	ILLUMINA	Illumina HiSeq 2500	Muscle	Muscle	Muscular System	Low_quality	Muscle	Muscular System	Unknown	Unknown
SAMEA4395227	Bos indicus	PAIRED	Unknown	Unknown	Unknown	ILLUMINA	Illumina HiSeq 2500	Muscle	Muscle	Muscular System	Low_quality	Muscle	Muscular System	Unknown	Unknown
SAMEA4395228	Bos indicus	PAIRED	Unknown	Unknown	Unknown	ILLUMINA	Illumina HiSeq 2500	Muscle	Muscle	Muscular System	Low_quality	Muscle	Muscular System	Unknown	Unknown
SAMEA4395229	Bos indicus	PAIRED	Unknown	Unknown	Unknown	ILLUMINA	Illumina HiSeq 2500	Muscle	Muscle	Muscular System	True	Muscle	Muscular System	Nelore	Male
SAMEA4395230	Bos indicus	PAIRED	Unknown	Unknown	Unknown	ILLUMINA	Illumina HiSeq 2500	Muscle	Muscle	Muscular System	Low_quality	Muscle	Muscular System	Unknown	Unknown
SAMEA4395231	Bos indicus	PAIRED	Unknown	Unknown	Unknown	ILLUMINA	Illumina HiSeq 2500	Muscle	Muscle	Muscular System	Low_quality	Muscle	Muscular System	Unknown	Unknown
SAMEA4395232	Bos indicus	PAIRED	Unknown	Unknown	Unknown	ILLUMINA	Illumina HiSeq 2500	Muscle	Muscle	Muscular System	Low_quality	Muscle	Muscular System	Unknown	Unknown
SAMEA4395233	Bos indicus	PAIRED	Unknown	Unknown	Unknown	ILLUMINA	Illumina HiSeq 2500	Muscle	Muscle	Muscular System	Low_quality	Muscle	Muscular System	Unknown	Unknown
SAMEA4395234	Bos indicus	PAIRED	Unknown	Unknown	Unknown	ILLUMINA	Illumina HiSeq 2500	Muscle	Muscle	Muscular System	True	Muscle	Muscular System	Nelore	Male
SAMEA4395235	Bos indicus	PAIRED	Unknown	Unknown	Unknown	ILLUMINA	Illumina HiSeq 2500	Muscle	Muscle	Muscular System	Low_quality	Muscle	Muscular System	Unknown	Unknown
SAMEA4395236	Bos indicus	PAIRED	Unknown	Unknown	Unknown	ILLUMINA	Illumina HiSeq 2500	Muscle	Muscle	Muscular System	True	Muscle	Muscular System	Nelore	Male
SAMEA4395237	Bos indicus	PAIRED	Unknown	Unknown	Unknown	ILLUMINA	Illumina HiSeq 2500	Muscle	Muscle	Muscular System	Low_quality	Muscle	Muscular System	Unknown	Unknown
SAMEA4395238	Bos indicus	PAIRED	Unknown	Unknown	Unknown	ILLUMINA	Illumina HiSeq 2500	Muscle	Muscle	Muscular System	Low_quality	Muscle	Muscular System	Unknown	Unknown
SAMEA4395239	Bos indicus	PAIRED	Unknown	Unknown	Unknown	ILLUMINA	Illumina HiSeq 2500	Muscle	Muscle	Muscular System	Low_quality	Muscle	Muscular System	Unknown	Unknown
SAMEA4395240	Bos indicus	PAIRED	Unknown	Unknown	Unknown	ILLUMINA	Illumina HiSeq 2500	Muscle	Muscle	Muscular System	Low_quality	Muscle	Muscular System	Unknown	Unknown
SAMEA4395241	Bos indicus	PAIRED	Unknown	Unknown	Unknown	ILLUMINA	Illumina HiSeq 2500	Muscle	Muscle	Muscular System	True	Muscle	Muscular System	Nelore	Female
SAMEA4395242	Bos indicus	PAIRED	Unknown	Unknown	Unknown	ILLUMINA	Illumina HiSeq 2500	Muscle	Muscle	Muscular System	Low_quality	Muscle	Muscular System	Unknown	Unknown
SAMEA4395243	Bos indicus	PAIRED	Unknown	Unknown	Unknown	ILLUMINA	Illumina HiSeq 2500	Muscle	Muscle	Muscular System	Low_quality	Muscle	Muscular System	Unknown	Unknown
SAMEA4395244	Bos indicus	PAIRED	Unknown	Unknown	Unknown	ILLUMINA	Illumina HiSeq 2500	Muscle	Muscle	Muscular System	Low_quality	Muscle	Muscular System	Unknown	Unknown
SAMEA4395245	Bos indicus	PAIRED	Unknown	Unknown	Unknown	ILLUMINA	Illumina HiSeq 2500	Muscle	Muscle	Muscular System	Low_quality	Muscle	Muscular System	Unknown	Unknown
SAMEA4395246	Bos indicus	PAIRED	Unknown	Unknown	Unknown	ILLUMINA	Illumina HiSeq 2500	Muscle	Muscle	Muscular System	True	Muscle	Muscular System	Nelore	Female
SAMEA4395247	Bos indicus	PAIRED	Unknown	Unknown	Unknown	ILLUMINA	Illumina HiSeq 2500	Muscle	Muscle	Muscular System	True	Muscle	Muscular System	Nelore	Male
SAMEA4395248	Bos indicus	PAIRED	Unknown	Unknown	Unknown	ILLUMINA	Illumina HiSeq 2500	Muscle	Muscle	Muscular System	Low_quality	Muscle	Muscular System	Unknown	Unknown
SAMEA4395249	Bos indicus	PAIRED	Unknown	Unknown	Unknown	ILLUMINA	Illumina HiSeq 2500	Muscle	Muscle	Muscular System	Low_quality	Muscle	Muscular System	Unknown	Unknown
SAMEA4395250	Bos indicus	PAIRED	Unknown	Unknown	Unknown	ILLUMINA	Illumina HiSeq 2500	Muscle	Muscle	Muscular System	Low_quality	Muscle	Muscular System	Unknown	Unknown
SAMEA4395251	Bos indicus	PAIRED	Unknown	Unknown	Unknown	ILLUMINA	Illumina HiSeq 2500	Muscle	Muscle	Muscular System	Low_quality	Muscle	Muscular System	Unknown	Unknown
SAMEA4395252	Bos indicus	PAIRED	Unknown	Unknown	Unknown	ILLUMINA	Illumina HiSeq 2500	Muscle	Muscle	Muscular System	Low_quality	Muscle	Muscular System	Unknown	Unknown
SAMEA4395253	Bos indicus	PAIRED	Unknown	Unknown	Unknown	ILLUMINA	Illumina HiSeq 2500	Muscle	Muscle	Muscular System	True	Muscle	Muscular System	Nelore	Male
SAMEA4395254	Bos indicus	PAIRED	Unknown	Unknown	Unknown	ILLUMINA	Illumina HiSeq 2500	Muscle	Muscle	Muscular System	Low_quality	Muscle	Muscular System	Unknown	Unknown
SAMEA4395255	Bos indicus	PAIRED	Unknown	Unknown	Unknown	ILLUMINA	Illumina HiSeq 2500	Muscle	Muscle	Muscular System	Low_quality	Muscle	Muscular System	Unknown	Unknown
SAMEA4395256	Bos indicus	PAIRED	Unknown	Unknown	Unknown	ILLUMINA	Illumina HiSeq 2500	Muscle	Muscle	Muscular System	True	Muscle	Muscular System	Nelore	Female
SAMEA4395257	Bos indicus	PAIRED	Unknown	Unknown	Unknown	ILLUMINA	Illumina HiSeq 2500	Muscle	Muscle	Muscular System	Low_quality	Muscle	Muscular System	Unknown	Unknown
SAMEA4395258	Bos indicus	PAIRED	Unknown	Unknown	Unknown	ILLUMINA	Illumina HiSeq 2500	Muscle	Muscle	Muscular System	True	Muscle	Muscular System	Nelore	Male
SAMEA4395259	Bos indicus	PAIRED	Unknown	Unknown	Unknown	ILLUMINA	Illumina HiSeq 2500	Muscle	Muscle	Muscular System	Low_quality	Muscle	Muscular System	Unknown	Unknown
SAMEA4395260	Bos indicus	PAIRED	Unknown	Unknown	Unknown	ILLUMINA	Illumina HiSeq 2500	Muscle	Muscle	Muscular System	Low_quality	Muscle	Muscular System	Unknown	Unknown
SAMEA4395261	Bos indicus	PAIRED	Unknown	Unknown	Unknown	ILLUMINA	Illumina HiSeq 2500	Muscle	Muscle	Muscular System	Low_quality	Muscle	Muscular System	Unknown	Unknown
SAMEA4395262	Bos indicus	PAIRED	Unknown	Unknown	Unknown	ILLUMINA	Illumina HiSeq 2500	Muscle	Muscle	Muscular System	True	Muscle	Muscular System	Nelore	Male
SAMEA4395263	Bos indicus	PAIRED	Unknown	Unknown	Unknown	ILLUMINA	Illumina HiSeq 2500	Muscle	Muscle	Muscular System	Low_quality	Muscle	Muscular System	Unknown	Unknown
SAMEA4395264	Bos indicus	PAIRED	Unknown	Unknown	Unknown	ILLUMINA	Illumina HiSeq 2500	Muscle	Muscle	Muscular System	True	Muscle	Muscular System	Nelore	Male
SAMEA4395265	Bos indicus	PAIRED	Unknown	Unknown	Unknown	ILLUMINA	Illumina HiSeq 2500	Muscle	Muscle	Muscular System	Low_quality	Muscle	Muscular System	Unknown	Unknown
SAMEA4395266	Bos indicus	PAIRED	Unknown	Unknown	Unknown	ILLUMINA	Illumina HiSeq 2500	Muscle	Muscle	Muscular System	Low_quality	Muscle	Muscular System	Unknown	Unknown
SAMEA4395267	Bos indicus	PAIRED	Unknown	Unknown	Unknown	ILLUMINA	Illumina HiSeq 2500	Muscle	Muscle	Muscular System	Low_quality	Muscle	Muscular System	Unknown	Unknown
SAMEA4395268	Bos indicus	PAIRED	Unknown	Unknown	Unknown	ILLUMINA	Illumina HiSeq 2500	Muscle	Muscle	Muscular System	True	Muscle	Muscular System	Nelore	Male
SAMEA4395269	Bos indicus	PAIRED	Unknown	Unknown	Unknown	ILLUMINA	Illumina HiSeq 2500	Muscle	Muscle	Muscular System	True	Muscle	Muscular System	Nelore	Male
SAMEA4395270	Bos indicus	PAIRED	Unknown	Unknown	Unknown	ILLUMINA	Illumina HiSeq 2500	Muscle	Muscle	Muscular System	Low_quality	Muscle	Muscular System	Unknown	Unknown
SAMEA4395271	Bos indicus	PAIRED	Unknown	Unknown	Unknown	ILLUMINA	Illumina HiSeq 2500	Muscle	Muscle	Muscular System	Low_quality	Muscle	Muscular System	Unknown	Unknown
SAMEA4395272	Bos indicus	PAIRED	Unknown	Unknown	Unknown	ILLUMINA	Illumina HiSeq 2500	Muscle	Muscle	Muscular System	True	Muscle	Muscular System	Nelore	Male
SAMEA4395273	Bos indicus	PAIRED	Unknown	Unknown	Unknown	ILLUMINA	Illumina HiSeq 2500	Muscle	Muscle	Muscular System	True	Muscle	Muscular System	Nelore	Male
SAMEA4395274	Bos indicus	PAIRED	Unknown	Unknown	Unknown	ILLUMINA	Illumina HiSeq 2500	Muscle	Muscle	Muscular System	True	Muscle	Muscular System	Nelore	Male
SAMEA4395275	Bos indicus	PAIRED	Unknown	Unknown	Unknown	ILLUMINA	Illumina HiSeq 2500	Muscle	Muscle	Muscular System	True	Muscle	Muscular System	Nelore	Male
SAMEA4395276	Bos indicus	PAIRED	Unknown	Unknown	Unknown	ILLUMINA	Illumina HiSeq 2500	Muscle	Muscle	Muscular System	Low_quality	Muscle	Muscular System	Unknown	Unknown
SAMEA4395277	Bos indicus	PAIRED	Unknown	Unknown	Unknown	ILLUMINA	Illumina HiSeq 2500	Muscle	Muscle	Muscular System	True	Muscle	Muscular System	Nelore	Male
SAMEA4395278	Bos indicus	PAIRED	Unknown	Unknown	Unknown	ILLUMINA	Illumina HiSeq 2500	Muscle	Muscle	Muscular System	True	Muscle	Muscular System	Nelore	Male
SAMEA4395279	Bos indicus	PAIRED	Unknown	Unknown	Unknown	ILLUMINA	Illumina HiSeq 2500	Muscle	Muscle	Muscular System	Low_quality	Muscle	Muscular System	Unknown	Unknown
SAMEA4395280	Bos indicus	PAIRED	Unknown	Unknown	Unknown	ILLUMINA	Illumina HiSeq 2500	Muscle	Muscle	Muscular System	True	Muscle	Muscular System	Nelore	Male
SAMEA4395281	Bos indicus	PAIRED	Unknown	Unknown	Unknown	ILLUMINA	Illumina HiSeq 2500	Muscle	Muscle	Muscular System	True	Muscle	Muscular System	Nelore	Male
SAMEA4395282	Bos indicus	PAIRED	Unknown	Unknown	Unknown	ILLUMINA	Illumina HiSeq 2500	Muscle	Muscle	Muscular System	Low_quality	Muscle	Muscular System	Unknown	Unknown
SAMEA4395283	Bos indicus	PAIRED	Unknown	Unknown	Unknown	ILLUMINA	Illumina HiSeq 2500	Muscle	Muscle	Muscular System	True	Muscle	Muscular System	Nelore	Male
SAMEA4395284	Bos indicus	PAIRED	Unknown	Unknown	Unknown	ILLUMINA	Illumina HiSeq 2500	Muscle	Muscle	Muscular System	True	Muscle	Muscular System	Nelore	Male
SAMEA4395285	Bos indicus	PAIRED	Unknown	Unknown	Unknown	ILLUMINA	Illumina HiSeq 2500	Muscle	Muscle	Muscular System	True	Muscle	Muscular System	Nelore	Male
SAMEA4395286	Bos indicus	PAIRED	Unknown	Unknown	Unknown	ILLUMINA	Illumina HiSeq 2500	Muscle	Muscle	Muscular System	True	Muscle	Muscular System	Nelore	Male
SAMEA4395287	Bos indicus	PAIRED	Unknown	Unknown	Unknown	ILLUMINA	Illumina HiSeq 2500	Muscle	Muscle	Muscular System	Low_quality	Muscle	Muscular System	Unknown	Unknown
SAMEA4395288	Bos indicus	PAIRED	Unknown	Unknown	Unknown	ILLUMINA	Illumina HiSeq 2500	Muscle	Muscle	Muscular System	Low_quality	Muscle	Muscular System	Unknown	Unknown
SAMEA4395289	Bos indicus	PAIRED	Unknown	Unknown	Unknown	ILLUMINA	Illumina HiSeq 2500	Muscle	Muscle	Muscular System	Low_quality	Muscle	Muscular System	Unknown	Unknown
SAMEA4395290	Bos indicus	PAIRED	Unknown	Unknown	Unknown	ILLUMINA	Illumina HiSeq 2500	Muscle	Muscle	Muscular System	Low_quality	Muscle	Muscular System	Unknown	Unknown
SAMEA4395291	Bos indicus	PAIRED	Unknown	Unknown	Unknown	ILLUMINA	Illumina HiSeq 2500	Muscle	Muscle	Muscular System	Low_quality	Muscle	Muscular System	Unknown	Unknown
SAMEA4395292	Bos indicus	PAIRED	Unknown	Unknown	Unknown	ILLUMINA	Illumina HiSeq 2500	Muscle	Muscle	Muscular System	True	Muscle	Muscular System	Nelore	Female
SAMEA4395293	Bos indicus	PAIRED	Unknown	Unknown	Unknown	ILLUMINA	Illumina HiSeq 2500	Muscle	Muscle	Muscular System	True	Muscle	Muscular System	Nelore	Female
SAMEA4395294	Bos indicus	PAIRED	Unknown	Unknown	Unknown	ILLUMINA	Illumina HiSeq 2500	Muscle	Muscle	Muscular System	Low_quality	Muscle	Muscular System	Unknown	Unknown
SAMEA4395295	Bos indicus	PAIRED	Unknown	Unknown	Unknown	ILLUMINA	Illumina HiSeq 2500	Muscle	Muscle	Muscular System	True	Muscle	Muscular System	Nelore	Male
SAMEA4395296	Bos indicus	PAIRED	Unknown	Unknown	Unknown	ILLUMINA	Illumina HiSeq 2500	Muscle	Muscle	Muscular System	Low_quality	Muscle	Muscular System	Unknown	Unknown
SAMEA4395297	Bos indicus	PAIRED	Unknown	Unknown	Unknown	ILLUMINA	Illumina HiSeq 2500	Muscle	Muscle	Muscular System	Low_quality	Muscle	Muscular System	Unknown	Unknown
SAMEA4395298	Bos indicus	PAIRED	Unknown	Unknown	Unknown	ILLUMINA	Illumina HiSeq 2500	Muscle	Muscle	Muscular System	Low_quality	Muscle	Muscular System	Unknown	Unknown
SAMEA4395299	Bos indicus	PAIRED	Unknown	Unknown	Unknown	ILLUMINA	Illumina HiSeq 2500	Muscle	Muscle	Muscular System	True	Muscle	Muscular System	Nelore	Female
SAMEA4395300	Bos indicus	PAIRED	Unknown	Unknown	Unknown	ILLUMINA	Illumina HiSeq 2500	Muscle	Muscle	Muscular System	Low_quality	Muscle	Muscular System	Unknown	Unknown
SAMEA4395301	Bos indicus	PAIRED	Unknown	Unknown	Unknown	ILLUMINA	Illumina HiSeq 2500	Muscle	Muscle	Muscular System	True	Muscle	Muscular System	Nelore	Male
SAMEA4395302	Bos indicus	PAIRED	Unknown	Unknown	Unknown	ILLUMINA	Illumina HiSeq 2500	Muscle	Muscle	Muscular System	Low_quality	Muscle	Muscular System	Unknown	Unknown
SAMEA4395303	Bos indicus	PAIRED	Unknown	Unknown	Unknown	ILLUMINA	Illumina HiSeq 2500	Muscle	Muscle	Muscular System	Low_quality	Muscle	Muscular System	Unknown	Unknown
SAMEA4395304	Bos indicus	PAIRED	Unknown	Unknown	Unknown	ILLUMINA	Illumina HiSeq 2500	Muscle	Muscle	Muscular System	Low_quality	Muscle	Muscular System	Unknown	Unknown
SAMEA4395305	Bos indicus	PAIRED	Unknown	Unknown	Unknown	ILLUMINA	Illumina HiSeq 2500	Muscle	Muscle	Muscular System	True	Muscle	Muscular System	Nelore	Male
SAMEA4395306	Bos indicus	PAIRED	Unknown	Unknown	Unknown	ILLUMINA	Illumina HiSeq 2500	Muscle	Muscle	Muscular System	True	Muscle	Muscular System	Nelore	Female
SAMEA4395307	Bos indicus	PAIRED	Unknown	Unknown	Unknown	ILLUMINA	Illumina HiSeq 2500	Muscle	Muscle	Muscular System	Low_quality	Muscle	Muscular System	Unknown	Unknown
SAMEA4395308	Bos indicus	PAIRED	Unknown	Unknown	Unknown	ILLUMINA	Illumina HiSeq 2500	Muscle	Muscle	Muscular System	True	Muscle	Muscular System	Nelore	Male
SAMEA4395309	Bos indicus	PAIRED	Unknown	Unknown	Unknown	ILLUMINA	Illumina HiSeq 2500	Muscle	Muscle	Muscular System	Low_quality	Muscle	Muscular System	Unknown	Unknown
SAMEA4395310	Bos indicus	PAIRED	Unknown	Unknown	Unknown	ILLUMINA	Illumina HiSeq 2500	Muscle	Muscle	Muscular System	True	Muscle	Muscular System	Nelore	Male
SAMEA4395311	Bos indicus	PAIRED	Unknown	Unknown	Unknown	ILLUMINA	Illumina HiSeq 2500	Muscle	Muscle	Muscular System	True	Muscle	Muscular System	Nelore	Male
SAMEA4395312	Bos indicus	PAIRED	Unknown	Unknown	Unknown	ILLUMINA	Illumina HiSeq 2500	Muscle	Muscle	Muscular System	True	Muscle	Muscular System	Nelore	Female
SAMEA4395313	Bos indicus	PAIRED	Unknown	Unknown	Unknown	ILLUMINA	Illumina HiSeq 2500	Muscle	Muscle	Muscular System	True	Muscle	Muscular System	Nelore	Male
SAMEA4395314	Bos indicus	PAIRED	Unknown	Unknown	Unknown	ILLUMINA	Illumina HiSeq 2500	Muscle	Muscle	Muscular System	Low_quality	Muscle	Muscular System	Unknown	Unknown
SAMEA4395315	Bos indicus	PAIRED	Unknown	Unknown	Unknown	ILLUMINA	Illumina HiSeq 2500	Muscle	Muscle	Muscular System	Low_quality	Muscle	Muscular System	Unknown	Unknown
SAMEA4395316	Bos indicus	PAIRED	Unknown	Unknown	Unknown	ILLUMINA	Illumina HiSeq 2500	Muscle	Muscle	Muscular System	Low_quality	Muscle	Muscular System	Unknown	Unknown
SAMEA4395317	Bos indicus	PAIRED	Unknown	Unknown	Unknown	ILLUMINA	Illumina HiSeq 2500	Muscle	Muscle	Muscular System	True	Muscle	Muscular System	Nelore	Male
SAMEA4395318	Bos indicus	PAIRED	Unknown	Unknown	Unknown	ILLUMINA	Illumina HiSeq 2500	Muscle	Muscle	Muscular System	True	Muscle	Muscular System	Nelore	Male
SAMEA4395319	Bos indicus	PAIRED	Unknown	Unknown	Unknown	ILLUMINA	Illumina HiSeq 2500	Muscle	Muscle	Muscular System	True	Muscle	Muscular System	Nelore	Male
SAMEA4395320	Bos indicus	PAIRED	Unknown	Unknown	Unknown	ILLUMINA	Illumina HiSeq 2500	Muscle	Muscle	Muscular System	True	Muscle	Muscular System	Nelore	Male
SAMEA4395321	Bos indicus	PAIRED	Unknown	Unknown	Unknown	ILLUMINA	Illumina HiSeq 2500	Muscle	Muscle	Muscular System	True	Muscle	Muscular System	Nelore	Male
SAMEA4395322	Bos indicus	PAIRED	Unknown	Unknown	Unknown	ILLUMINA	Illumina HiSeq 2500	Muscle	Muscle	Muscular System	True	Muscle	Muscular System	Nelore	Male
SAMEA4395323	Bos indicus	PAIRED	Unknown	Unknown	Unknown	ILLUMINA	Illumina HiSeq 2500	Muscle	Muscle	Muscular System	Low_quality	Muscle	Muscular System	Unknown	Unknown
SAMEA4395324	Bos indicus	PAIRED	Unknown	Unknown	Unknown	ILLUMINA	Illumina HiSeq 2500	Muscle	Muscle	Muscular System	Low_quality	Muscle	Muscular System	Unknown	Unknown
SAMEA4395325	Bos indicus	PAIRED	Unknown	Unknown	Unknown	ILLUMINA	Illumina HiSeq 2500	Muscle	Muscle	Muscular System	True	Muscle	Muscular System	Nelore	Male
SAMEA4395326	Bos indicus	PAIRED	Unknown	Unknown	Unknown	ILLUMINA	Illumina HiSeq 2500	Muscle	Muscle	Muscular System	Low_quality	Muscle	Muscular System	Unknown	Unknown
SAMEA4395327	Bos indicus	PAIRED	Unknown	Unknown	Unknown	ILLUMINA	Illumina HiSeq 2500	Muscle	Muscle	Muscular System	Low_quality	Muscle	Muscular System	Unknown	Unknown
SAMEA4395328	Bos indicus	PAIRED	Unknown	Unknown	Unknown	ILLUMINA	Illumina HiSeq 2500	Muscle	Muscle	Muscular System	True	Muscle	Muscular System	Nelore	Male
SAMEA4395329	Bos indicus	PAIRED	Unknown	Unknown	Unknown	ILLUMINA	Illumina HiSeq 2500	Muscle	Muscle	Muscular System	True	Muscle	Muscular System	Nelore	Female
SAMEA4395330	Bos indicus	PAIRED	Unknown	Unknown	Unknown	ILLUMINA	Illumina HiSeq 2500	Muscle	Muscle	Muscular System	True	Muscle	Muscular System	Nelore	Male
SAMEA4395331	Bos indicus	PAIRED	Unknown	Unknown	Unknown	ILLUMINA	Illumina HiSeq 2500	Muscle	Muscle	Muscular System	True	Muscle	Muscular System	Nelore	Male
SAMEA4395332	Bos indicus	PAIRED	Unknown	Unknown	Unknown	ILLUMINA	Illumina HiSeq 2500	Muscle	Muscle	Muscular System	Low_quality	Muscle	Muscular System	Unknown	Unknown
SAMEA4395333	Bos indicus	PAIRED	Unknown	Unknown	Unknown	ILLUMINA	Illumina HiSeq 2500	Muscle	Muscle	Muscular System	True	Muscle	Muscular System	Nelore	Male
SAMEA4395334	Bos indicus	PAIRED	Unknown	Unknown	Unknown	ILLUMINA	Illumina HiSeq 2500	Muscle	Muscle	Muscular System	Low_quality	Muscle	Muscular System	Unknown	Unknown
SAMEA4395335	Bos indicus	PAIRED	Unknown	Unknown	Unknown	ILLUMINA	Illumina HiSeq 2500	Muscle	Muscle	Muscular System	True	Muscle	Muscular System	Nelore	Male
SAMEA4395336	Bos indicus	PAIRED	Unknown	Unknown	Unknown	ILLUMINA	Illumina HiSeq 2500	Muscle	Muscle	Muscular System	True	Muscle	Muscular System	Nelore	Male
SAMEA4395337	Bos indicus	PAIRED	Unknown	Unknown	Unknown	ILLUMINA	Illumina HiSeq 2500	Muscle	Muscle	Muscular System	Low_quality	Muscle	Muscular System	Unknown	Unknown
SAMEA4395338	Bos indicus	PAIRED	Unknown	Unknown	Unknown	ILLUMINA	Illumina HiSeq 2500	Muscle	Muscle	Muscular System	True	Muscle	Muscular System	Nelore	Male
SAMEA4395339	Bos indicus	PAIRED	Unknown	Unknown	Unknown	ILLUMINA	Illumina HiSeq 2500	Muscle	Muscle	Muscular System	Low_quality	Muscle	Muscular System	Unknown	Unknown
SAMEA4395340	Bos indicus	PAIRED	Unknown	Unknown	Unknown	ILLUMINA	Illumina HiSeq 2500	Muscle	Muscle	Muscular System	Low_quality	Muscle	Muscular System	Unknown	Unknown
SAMEA4395341	Bos indicus	PAIRED	Unknown	Unknown	Unknown	ILLUMINA	Illumina HiSeq 2500	Muscle	Muscle	Muscular System	True	Muscle	Muscular System	Nelore	Male
SAMEA4395342	Bos indicus	PAIRED	Unknown	Unknown	Unknown	ILLUMINA	Illumina HiSeq 2500	Muscle	Muscle	Muscular System	Low_quality	Muscle	Muscular System	Unknown	Unknown
SAMEA4395343	Bos indicus	PAIRED	Unknown	Unknown	Unknown	ILLUMINA	Illumina HiSeq 2500	Muscle	Muscle	Muscular System	Low_quality	Muscle	Muscular System	Unknown	Unknown
SAMEA4395344	Bos indicus	PAIRED	Unknown	Unknown	Unknown	ILLUMINA	Illumina HiSeq 2500	Muscle	Muscle	Muscular System	True	Muscle	Muscular System	Nelore	Female
SAMEA4395345	Bos indicus	PAIRED	Unknown	Unknown	Unknown	ILLUMINA	Illumina HiSeq 2500	Muscle	Muscle	Muscular System	Low_quality	Muscle	Muscular System	Unknown	Unknown
SAMEA4395346	Bos indicus	PAIRED	Unknown	Unknown	Unknown	ILLUMINA	Illumina HiSeq 2500	Muscle	Muscle	Muscular System	True	Muscle	Muscular System	Nelore	Male
SAMEA4395347	Bos indicus	PAIRED	Unknown	Unknown	Unknown	ILLUMINA	Illumina HiSeq 2500	Muscle	Muscle	Muscular System	Low_quality	Muscle	Muscular System	Unknown	Unknown
SAMEA4430986	Bos indicus	PAIRED	Unknown	Unknown	Unknown	ILLUMINA	Illumina HiSeq 2500	Muscle	Muscle	Muscular System	Failed	Muscle	Muscular System	Unknown	Unknown
SAMEA4430987	Bos indicus	PAIRED	Unknown	Unknown	Unknown	ILLUMINA	Illumina HiSeq 2500	Muscle	Muscle	Muscular System	True	Muscle	Muscular System	Nelore	Male
SAMEA4430988	Bos indicus	PAIRED	Unknown	Unknown	Unknown	ILLUMINA	Illumina HiSeq 2500	Muscle	Muscle	Muscular System	True	Muscle	Muscular System	Nelore	Male
SAMEA4430989	Bos indicus	PAIRED	Unknown	Unknown	Unknown	ILLUMINA	Illumina HiSeq 2500	Muscle	Muscle	Muscular System	Failed	Muscle	Muscular System	Unknown	Unknown
SAMEA4430990	Bos indicus	PAIRED	Unknown	Unknown	Unknown	ILLUMINA	Illumina HiSeq 2500	Muscle	Muscle	Muscular System	True	Muscle	Muscular System	Nelore	Female
SAMEA4430991	Bos indicus	PAIRED	Unknown	Unknown	Unknown	ILLUMINA	Illumina HiSeq 2500	Muscle	Muscle	Muscular System	True	Muscle	Muscular System	Nelore	Male
SAMEA4430992	Bos indicus	PAIRED	Unknown	Unknown	Unknown	ILLUMINA	Illumina HiSeq 2500	Muscle	Muscle	Muscular System	True	Muscle	Muscular System	Nelore	Male
SAMEA4430993	Bos indicus	PAIRED	Unknown	Unknown	Unknown	ILLUMINA	Illumina HiSeq 2500	Muscle	Muscle	Muscular System	True	Muscle	Muscular System	Nelore	Male
SAMEA4430994	Bos indicus	PAIRED	Unknown	Unknown	Unknown	ILLUMINA	Illumina HiSeq 2500	Muscle	Muscle	Muscular System	True	Muscle	Muscular System	Nelore	Male
SAMEA4430995	Bos indicus	PAIRED	Unknown	Unknown	Unknown	ILLUMINA	Illumina HiSeq 2500	Muscle	Muscle	Muscular System	Failed	Muscle	Muscular System	Unknown	Unknown
SAMEA4430996	Bos indicus	PAIRED	Unknown	Unknown	Unknown	ILLUMINA	Illumina HiSeq 2500	Muscle	Muscle	Muscular System	True	Muscle	Muscular System	Nelore	Male
SAMEA4430997	Bos indicus	PAIRED	Unknown	Unknown	Unknown	ILLUMINA	Illumina HiSeq 2500	Muscle	Muscle	Muscular System	True	Muscle	Muscular System	Nelore	Male
SAMEA4430998	Bos indicus	PAIRED	Unknown	Unknown	Unknown	ILLUMINA	Illumina HiSeq 2500	Muscle	Muscle	Muscular System	True	Muscle	Muscular System	Nelore	Male
SAMEA4430999	Bos indicus	PAIRED	Unknown	Unknown	Unknown	ILLUMINA	Illumina HiSeq 2500	Muscle	Muscle	Muscular System	True	Muscle	Muscular System	Nelore	Male
SAMEA4431000	Bos indicus	PAIRED	Unknown	Unknown	Unknown	ILLUMINA	Illumina HiSeq 2500	Muscle	Muscle	Muscular System	True	Muscle	Muscular System	Nelore	Male
SAMEA4431001	Bos indicus	PAIRED	Unknown	Unknown	Unknown	ILLUMINA	Illumina HiSeq 2500	Muscle	Muscle	Muscular System	True	Muscle	Muscular System	Nelore	Male
SAMEA4431002	Bos indicus	PAIRED	Unknown	Unknown	Unknown	ILLUMINA	Illumina HiSeq 2500	Muscle	Muscle	Muscular System	True	Muscle	Muscular System	Nelore	Male
SAMEA4431003	Bos indicus	PAIRED	Unknown	Unknown	Unknown	ILLUMINA	Illumina HiSeq 2500	Muscle	Muscle	Muscular System	True	Muscle	Muscular System	Nelore	Male
SAMEA4431004	Bos indicus	PAIRED	Unknown	Unknown	Unknown	ILLUMINA	Illumina HiSeq 2500	Muscle	Muscle	Muscular System	True	Muscle	Muscular System	Nelore	Male
SAMEA4431005	Bos indicus	PAIRED	Unknown	Unknown	Unknown	ILLUMINA	Illumina HiSeq 2500	Muscle	Muscle	Muscular System	True	Muscle	Muscular System	Nelore	Male
SAMEA4447756	Bos taurus	PAIRED	Unknown	Embryo	Unknown	ILLUMINA	Illumina HiSeq 3000	Brain	CNS	Nervous System	True	CNS	Nervous System	Holstein	Female
SAMEA4447759	Bos taurus	PAIRED	Unknown	Embryo	Female	ILLUMINA	Illumina HiSeq 3000	Kidney	Kidney	Urinary System	True	Kidney	Urinary System	Holstein	Female
SAMEA4447760	Bos taurus	PAIRED	Unknown	Embryo	Unknown	ILLUMINA	Illumina HiSeq 3000	Thyroid	Thyroid	Endocrine System	True	Thyroid	Endocrine System	Holstein	Female
SAMEA4447761	Bos taurus	PAIRED	Unknown	Embryo	Unknown	ILLUMINA	Illumina HiSeq 3000	Semimembranosus Muscle	Muscle	Muscular System	False	Embryo	Embryo	Holstein	Female
SAMEA4447762	Bos taurus	PAIRED	Unknown	Embryo	Unknown	ILLUMINA	Illumina HiSeq 3000	Mammary Gland	Mammary Gland	Mammary Gland	True	Mammary Gland	Mammary Gland	Unknown	Unknown
SAMEA4447763	Bos taurus	PAIRED	Unknown	Embryo	Unknown	ILLUMINA	Illumina HiSeq 3000	Cerebellum	CNS	Nervous System	True	CNS	Nervous System	Holstein	Female
SAMEA4447764	Bos taurus	PAIRED	Unknown	Embryo	Unknown	ILLUMINA	Illumina HiSeq 3000	Placenta	Placenta	Female Reproductive System	True	Placenta	Female Reproductive System	Holstein	Female
SAMEA4447765	Bos taurus	PAIRED	Unknown	Embryo	Unknown	ILLUMINA	Illumina HiSeq 3000	Renal Medulla	Kidney	Urinary System	True	Kidney	Urinary System	Holstein	Female
SAMEA4447766	Bos taurus	PAIRED	Unknown	Embryo	Unknown	ILLUMINA	Illumina HiSeq 3000	Lung	Lung	Respiratory System	True	Lung	Respiratory System	Holstein	Female
SAMEA4447767	Bos taurus	PAIRED	Unknown	Embryo	Unknown	ILLUMINA	Illumina HiSeq 3000	Lung	Lung	Respiratory System	True	Lung	Respiratory System	Holstein	Female
SAMEA4447768	Bos taurus	PAIRED	Unknown	Embryo	Unknown	ILLUMINA	Illumina HiSeq 3000	Omental Fat Pad	Visceral Fat	Adipose	True	Visceral Fat	Adipose	Holstein	Female
SAMEA4447769	Bos taurus	PAIRED	Unknown	Embryo	Unknown	ILLUMINA	Illumina HiSeq 3000	Adrenal Cortex	Adrenal	Endocrine System	True	Adrenal	Endocrine System	Holstein	Female
SAMEA4447771	Bos taurus	PAIRED	Unknown	Embryo	Unknown	ILLUMINA	Illumina HiSeq 3000	Mediastinal Lymph Node	Lymph Node	Immune System	True	Lymph Node	Immune System	Holstein	Female
SAMEA4447772	Bos taurus	PAIRED	Unknown	Embryo	Unknown	ILLUMINA	Illumina HiSeq 3000	Intercostal Muscle	Muscle	Muscular System	True	Muscle	Muscular System	Holstein	Female
SAMEA4447773	Bos taurus	PAIRED	Unknown	Embryo	Unknown	ILLUMINA	Illumina HiSeq 3000	Leukocyte	Leukocyte	Immune System	True	Leukocyte	Immune System	Holstein	Female
SAMEA4447774	Bos taurus	PAIRED	Unknown	Embryo	Unknown	ILLUMINA	Illumina HiSeq 3000	Heart	Heart	Cardiovascular System	False	Embryo	Embryo	Holstein	Male
SAMEA4447775	Bos taurus	PAIRED	Unknown	Embryo	Unknown	ILLUMINA	Illumina HiSeq 3000	Lung	Lung	Respiratory System	False	Embryo	Embryo	Holstein	Female
SAMEA4447776	Bos taurus	PAIRED	Unknown	Embryo	Female	ILLUMINA	Illumina HiSeq 3000	Female Gonad	Ovary	Female Reproductive System	True	Ovary	Female Reproductive System	Holstein	Female
SAMEA4447777	Bos taurus	PAIRED	Unknown	Embryo	Unknown	ILLUMINA	Illumina HiSeq 3000	Subcutaneous Adipose	Subcutaneous Adipose	Adipose	True	Subcutaneous Adipose	Adipose	Holstein	Female
SAMEA4447778	Bos taurus	PAIRED	Unknown	Embryo	Unknown	ILLUMINA	Illumina HiSeq 3000	Tongue	Muscle	Muscular System	True	Muscle	Muscular System	Holstein	Female
SAMEA4447779	Bos taurus	PAIRED	Unknown	Embryo	Unknown	ILLUMINA	Illumina HiSeq 3000	Brain	CNS	Nervous System	True	CNS	Nervous System	Holstein	Female
SAMEA4447780	Bos taurus	PAIRED	Unknown	Embryo	Unknown	ILLUMINA	Illumina HiSeq 3000	Latissimus Dorsi Muscle	Muscle	Muscular System	True	Muscle	Muscular System	Holstein	Female
SAMEA4447782	Bos taurus	PAIRED	Unknown	Embryo	Unknown	ILLUMINA	Illumina HiSeq 3000	Adrenal Medulla	Adrenal	Endocrine System	True	Adrenal	Endocrine System	Holstein	Female
SAMEA4447783	Bos taurus	PAIRED	Unknown	Embryo	Unknown	ILLUMINA	Illumina HiSeq 3000	Lung	Lung	Respiratory System	False	Embryo	Embryo	Holstein	Male
SAMEA4447786	Bos taurus	PAIRED	Unknown	Embryo	Unknown	ILLUMINA	Illumina HiSeq 3000	Omental Fat Pad	Visceral Fat	Adipose	True	Visceral Fat	Adipose	Holstein	Female
SAMEA4447787	Bos taurus	PAIRED	Unknown	Embryo	Unknown	ILLUMINA	Illumina HiSeq 3000	Liver	Liver	Liver	True	Liver	Liver	Holstein	Female
SAMEA4447788	Bos taurus	PAIRED	Unknown	Embryo	Unknown	ILLUMINA	Illumina HiSeq 3000	Semimembranosus Muscle	Muscle	Muscular System	True	Muscle	Muscular System	Holstein	Female
SAMEA4447789	Bos taurus	PAIRED	Unknown	Embryo	Unknown	ILLUMINA	Illumina HiSeq 3000	Kidney	Kidney	Urinary System	True	Kidney	Urinary System	Holstein	Female
SAMEA4447790	Bos taurus	PAIRED	Unknown	Embryo	Unknown	ILLUMINA	Illumina HiSeq 3000	Skin	Skin	Integumentary System	True	Skin	Integumentary System	Holstein	Female
SAMEA4447791	Bos taurus	PAIRED	Unknown	Embryo	Unknown	ILLUMINA	Illumina HiSeq 3000	Thyroid	Thyroid	Endocrine System	True	Thyroid	Endocrine System	Holstein	Female
SAMEA4447792	Bos taurus	PAIRED	Unknown	Embryo	Unknown	ILLUMINA	Illumina HiSeq 3000	Liver	Liver	Liver	True	Liver	Liver	Holstein	Female
SAMEA4447793	Bos taurus	PAIRED	Unknown	Embryo	Unknown	ILLUMINA	Illumina HiSeq 3000	Tongue	Muscle	Muscular System	True	Muscle	Muscular System	Holstein	Female
SAMEA4447796	Bos taurus	PAIRED	Unknown	Embryo	Female	ILLUMINA	Illumina HiSeq 3000	Female Gonad	Ovary	Female Reproductive System	True	Ovary	Female Reproductive System	Holstein	Female
SAMEA4447797	Bos taurus	PAIRED	Unknown	Embryo	Unknown	ILLUMINA	Illumina HiSeq 3000	Cortex Of Kidney	Kidney	Urinary System	True	Kidney	Urinary System	Holstein	Female
SAMEA4447798	Bos taurus	PAIRED	Unknown	Embryo	Unknown	ILLUMINA	Illumina HiSeq 3000	Renal Medulla	Kidney	Urinary System	True	Kidney	Urinary System	Holstein	Female
SAMEA4447800	Bos taurus	PAIRED	Unknown	Embryo	Unknown	ILLUMINA	Illumina HiSeq 3000	Placenta	Placenta	Female Reproductive System	True	Placenta	Female Reproductive System	Holstein	Female
SAMEA4447801	Bos taurus	PAIRED	Unknown	Embryo	Unknown	ILLUMINA	Illumina HiSeq 3000	Heart	Heart	Cardiovascular System	True	Heart	Cardiovascular System	Holstein	Female
SAMEA4447802	Bos taurus	PAIRED	Unknown	Embryo	Unknown	ILLUMINA	Illumina HiSeq 3000	Spleen	Spleen	Immune System	True	Spleen	Immune System	Holstein	Female
SAMEA4447803	Bos taurus	PAIRED	Unknown	Embryo	Unknown	ILLUMINA	Illumina HiSeq 3000	Brain	CNS	Nervous System	True	CNS	Nervous System	Holstein	Female
SAMEA4447804	Bos taurus	PAIRED	Unknown	Embryo	Unknown	ILLUMINA	Illumina HiSeq 3000	Skin	Skin	Integumentary System	True	Skin	Integumentary System	Holstein	Female
SAMEA4447805	Bos taurus	PAIRED	Unknown	Embryo	Unknown	ILLUMINA	Illumina HiSeq 3000	Heart	Heart	Cardiovascular System	False	Embryo	Embryo	Holstein	Female
SAMEA4447806	Bos taurus	PAIRED	Unknown	Embryo	Unknown	ILLUMINA	Illumina HiSeq 3000	Spleen	Spleen	Immune System	True	Spleen	Immune System	Holstein	Female
SAMEA4447807	Bos taurus	PAIRED	Unknown	Embryo	Unknown	ILLUMINA	Illumina HiSeq 3000	Skin	Skin	Integumentary System	True	Skin	Integumentary System	Holstein	Female
SAMEA4447808	Bos taurus	PAIRED	Unknown	Embryo	Unknown	ILLUMINA	Illumina HiSeq 3000	Lymph Node	Lymph Node	Immune System	True	Lymph Node	Immune System	Holstein	Female
SAMEA4447809	Bos taurus	PAIRED	Unknown	Embryo	Unknown	ILLUMINA	Illumina HiSeq 3000	Heart	Heart	Cardiovascular System	True	Heart	Cardiovascular System	Holstein	Female
SAMEA4447812	Bos taurus	PAIRED	Unknown	Embryo	Unknown	ILLUMINA	Illumina HiSeq 3000	Brain Stem	CNS	Nervous System	True	CNS	Nervous System	Holstein	Female
SAMEA4447813	Bos taurus	PAIRED	Unknown	Embryo	Unknown	ILLUMINA	Illumina HiSeq 3000	Longissimus Thoraci Muscle	Muscle	Muscular System	True	Muscle	Muscular System	Holstein	Female
SAMEA4447814	Bos taurus	PAIRED	Unknown	Embryo	Unknown	ILLUMINA	Illumina HiSeq 3000	Liver	Liver	Liver	True	Liver	Liver	Holstein	Female
SAMEA4447815	Bos taurus	PAIRED	Unknown	Embryo	Unknown	ILLUMINA	Illumina HiSeq 3000	Lymph Node	Lymph Node	Immune System	True	Lymph Node	Immune System	Holstein	Female
SAMEA4447816	Bos taurus	PAIRED	Unknown	Embryo	Unknown	ILLUMINA	Illumina HiSeq 3000	Longissimus Thoraci Muscle	Muscle	Muscular System	True	Muscle	Muscular System	Holstein	Female
SAMEA4447817	Bos taurus	PAIRED	Unknown	Embryo	Unknown	ILLUMINA	Illumina HiSeq 3000	Latissimus Dorsi Muscle	Muscle	Muscular System	True	Muscle	Muscular System	Holstein	Female
SAMEA4447818	Bos taurus	PAIRED	Unknown	Embryo	Unknown	ILLUMINA	Illumina HiSeq 3000	Thymus	Thymus	Immune System	True	Thymus	Immune System	Holstein	Female
SAMEA4447819	Bos taurus	PAIRED	Unknown	Embryo	Unknown	ILLUMINA	Illumina HiSeq 3000	Cortex Of Kidney	Kidney	Urinary System	True	Kidney	Urinary System	Holstein	Female
SAMEA4447820	Bos taurus	PAIRED	Unknown	Embryo	Unknown	ILLUMINA	Illumina HiSeq 3000	Subcutaneous Adipose	Subcutaneous Adipose	Adipose	True	Subcutaneous Adipose	Adipose	Holstein	Female
SAMEA4447821	Bos taurus	PAIRED	Unknown	Embryo	Unknown	ILLUMINA	Illumina HiSeq 3000	Pituitary	Pituitary	Nervous System	True	Pituitary	Nervous System	Holstein	Female
SAMEA4447822	Bos taurus	PAIRED	Unknown	Embryo	Unknown	ILLUMINA	Illumina HiSeq 3000	Skin	Skin	Integumentary System	True	Skin	Integumentary System	Holstein	Female
SAMEA4447823	Bos taurus	PAIRED	Unknown	Embryo	Unknown	ILLUMINA	Illumina HiSeq 3000	Liver	Liver	Liver	True	Liver	Liver	Holstein	Female
SAMEA4447824	Bos taurus	PAIRED	Unknown	Embryo	Unknown	ILLUMINA	Illumina HiSeq 3000	Mediastinal Lymph Node	Lymph Node	Immune System	True	Lymph Node	Immune System	Holstein	Female
SAMEA4447826	Bos taurus	PAIRED	Unknown	Embryo	Unknown	ILLUMINA	Illumina HiSeq 3000	Semimembranosus Muscle	Muscle	Muscular System	False	Embryo	Embryo	Holstein	Female
SAMEA4447827	Bos taurus	PAIRED	Unknown	Embryo	Unknown	ILLUMINA	Illumina HiSeq 3000	Adrenal Medulla	Adrenal	Endocrine System	True	Adrenal	Endocrine System	Holstein	Female
SAMEA4447828	Bos taurus	PAIRED	Unknown	Embryo	Unknown	ILLUMINA	Illumina HiSeq 3000	Semimembranosus Muscle	Muscle	Muscular System	True	Muscle	Muscular System	Holstein	Female
SAMEA4447829	Bos taurus	PAIRED	Unknown	Embryo	Unknown	ILLUMINA	Illumina HiSeq 3000	Brain Stem	CNS	Nervous System	True	CNS	Nervous System	Holstein	Female
SAMEA4447830	Bos taurus	PAIRED	Unknown	Embryo	Unknown	ILLUMINA	Illumina HiSeq 3000	Mammary Gland	Mammary Gland	Mammary Gland	True	Mammary Gland	Mammary Gland	Holstein	Female
SAMEA4447831	Bos taurus	PAIRED	Unknown	Embryo	Unknown	ILLUMINA	Illumina HiSeq 3000	Cerebellum	CNS	Nervous System	True	CNS	Nervous System	Holstein	Female
SAMEA4447833	Bos taurus	PAIRED	Unknown	Embryo	Unknown	ILLUMINA	Illumina HiSeq 3000	Brain	CNS	Nervous System	True	CNS	Nervous System	Holstein	Female
SAMEA4447834	Bos taurus	PAIRED	Unknown	Embryo	Unknown	ILLUMINA	Illumina HiSeq 3000	Pituitary	Pituitary	Nervous System	True	Pituitary	Nervous System	Holstein	Female
SAMEA4447835	Bos taurus	PAIRED	Unknown	Embryo	Unknown	ILLUMINA	Illumina HiSeq 3000	Adrenal Cortex	Adrenal	Endocrine System	True	Adrenal	Endocrine System	Holstein	Female
SAMEA4447836	Bos taurus	PAIRED	Unknown	Embryo	Unknown	ILLUMINA	Illumina HiSeq 3000	Thymus	Thymus	Immune System	True	Thymus	Immune System	Holstein	Female
SAMEA4447837	Bos taurus	PAIRED	Unknown	Embryo	Unknown	ILLUMINA	Illumina HiSeq 3000	Intercostal Muscle	Muscle	Muscular System	True	Muscle	Muscular System	Holstein	Female
SAMEA4447838	Bos taurus	PAIRED	Unknown	Embryo	Unknown	ILLUMINA	Illumina HiSeq 3000	Leukocyte	Leukocyte	Immune System	True	Leukocyte	Immune System	Holstein	Female
SAMEA4454616	Bos taurus	PAIRED	Unknown	14 months	Unknown	ILLUMINA	Illumina HiSeq 3000	Cerebellum	CNS	Nervous System	True	CNS	Nervous System	Hereford	Male
SAMEA4454627	Bos taurus	PAIRED	Unknown	14 months	Unknown	ILLUMINA	Illumina HiSeq 3000	Hypothalamus	Hypothalamus	Nervous System	True	Hypothalamus	Nervous System	Hereford	Male
SAMEA4454667	Bos taurus	PAIRED	Unknown	14 months	Unknown	ILLUMINA	Illumina HiSeq 3000	Lobe Of Liver	Liver	Liver	True	Liver	Liver	Hereford	Male
SAMEA4454678	Bos taurus	PAIRED	Unknown	14 months	Unknown	ILLUMINA	Illumina HiSeq 3000	Longissimus Dorsi Muscle	Muscle	Muscular System	True	Muscle	Muscular System	Hereford	Male
SAMEA4454781	Bos taurus	PAIRED	Unknown	14 months	Unknown	ILLUMINA	Illumina HiSeq 3000	Frontal Cortex	CNS	Nervous System	True	CNS	Nervous System	Hereford	Male
SAMEA4454784	Bos taurus	PAIRED	Unknown	14 months	Unknown	ILLUMINA	Illumina HiSeq 3000	Spleen	Spleen	Immune System	True	Spleen	Immune System	Hereford	Male
SAMEA4454909	Bos taurus	PAIRED	Unknown	14 months	Unknown	ILLUMINA	Illumina HiSeq 3000	Subcutaneous Adipose	Subcutaneous Adipose	Adipose	True	Subcutaneous Adipose	Adipose	Hereford	Male
SAMEA4454929	Bos taurus	PAIRED	Unknown	14 months	Unknown	ILLUMINA	Illumina HiSeq 3000	Left Lung Lobe	Lung	Respiratory System	True	Lung	Respiratory System	Hereford	Male
SAMEA4455415	Bos taurus	PAIRED	Unknown	14 months	Unknown	ILLUMINA	Illumina HiSeq 3000	Lobe Of Liver	Liver	Liver	True	Liver	Liver	Hereford	Male
SAMEA4455423	Bos taurus	PAIRED	Unknown	14 months	Unknown	ILLUMINA	Illumina HiSeq 3000	Subcutaneous Adipose	Subcutaneous Adipose	Adipose	True	Subcutaneous Adipose	Adipose	Hereford	Male
SAMEA4455432	Bos taurus	PAIRED	Unknown	14 months	Unknown	ILLUMINA	Illumina HiSeq 3000	Spleen	Spleen	Immune System	True	Spleen	Immune System	Hereford	Male
SAMEA4455442	Bos taurus	PAIRED	Unknown	14 months	Unknown	ILLUMINA	Illumina HiSeq 3000	Left Lung Lobe	Lung	Respiratory System	True	Lung	Respiratory System	Hereford	Male
SAMEA4455451	Bos taurus	PAIRED	Unknown	14 months	Unknown	ILLUMINA	Illumina HiSeq 3000	Frontal Cortex	CNS	Nervous System	True	CNS	Nervous System	Hereford	Male
SAMEA4455455	Bos taurus	PAIRED	Unknown	14 months	Unknown	ILLUMINA	Illumina HiSeq 3000	Longissimus Dorsi Muscle	Muscle	Muscular System	True	Muscle	Muscular System	Hereford	Male
SAMEA4455466	Bos taurus	PAIRED	Unknown	14 months	Unknown	ILLUMINA	Illumina HiSeq 3000	Hypothalamus	Hypothalamus	Nervous System	True	Hypothalamus	Nervous System	Hereford	Male
SAMEA4455469	Bos taurus	PAIRED	Unknown	14 months	Unknown	ILLUMINA	Illumina HiSeq 3000	Cerebellum	CNS	Nervous System	True	CNS	Nervous System	Hereford	Male
SAMEA4551975	Bos taurus	SINGLE	Unknown	Unknown	Unknown	ILLUMINA	NextSeq 500	Blood	Blood	Immune System	True	Blood	Immune System	Holstein	Female
SAMEA4551976	Bos taurus	SINGLE	Unknown	Unknown	Unknown	ILLUMINA	NextSeq 500	Blood	Blood	Immune System	True	Blood	Immune System	Holstein	Female
SAMEA4551977	Bos taurus	SINGLE	Unknown	Unknown	Unknown	ILLUMINA	NextSeq 500	Blood	Blood	Immune System	True	Blood	Immune System	Holstein	Female
SAMEA4551978	Bos taurus	SINGLE	Unknown	Unknown	Unknown	ILLUMINA	NextSeq 500	Blood	Blood	Immune System	True	Blood	Immune System	Holstein	Female
SAMEA4551979	Bos taurus	SINGLE	Unknown	Unknown	Unknown	ILLUMINA	NextSeq 500	Blood	Blood	Immune System	True	Blood	Immune System	Holstein	Female
SAMEA4551980	Bos taurus	SINGLE	Unknown	Unknown	Unknown	ILLUMINA	NextSeq 500	Blood	Blood	Immune System	True	Blood	Immune System	Holstein	Female
SAMEA4551981	Bos taurus	SINGLE	Unknown	Unknown	Unknown	ILLUMINA	NextSeq 500	Blood	Blood	Immune System	True	Blood	Immune System	Holstein	Female
SAMEA4551982	Bos taurus	SINGLE	Unknown	Unknown	Unknown	ILLUMINA	NextSeq 500	Blood	Blood	Immune System	True	Blood	Immune System	Holstein	Female
SAMEA4551983	Bos taurus	SINGLE	Unknown	Unknown	Unknown	ILLUMINA	NextSeq 500	Blood	Blood	Immune System	True	Blood	Immune System	Holstein	Female
SAMEA4551984	Bos taurus	SINGLE	Unknown	Unknown	Unknown	ILLUMINA	NextSeq 500	Blood	Blood	Immune System	True	Blood	Immune System	Holstein	Female
SAMEA4551985	Bos taurus	SINGLE	Unknown	Unknown	Unknown	ILLUMINA	NextSeq 500	Blood	Blood	Immune System	True	Blood	Immune System	Holstein	Female
SAMEA4551986	Bos taurus	SINGLE	Unknown	Unknown	Unknown	ILLUMINA	NextSeq 500	Blood	Blood	Immune System	True	Blood	Immune System	Holstein	Female
SAMEA4551987	Bos taurus	SINGLE	Unknown	Unknown	Unknown	ILLUMINA	NextSeq 500	Blood	Blood	Immune System	True	Blood	Immune System	Holstein	Female
SAMEA4551988	Bos taurus	SINGLE	Unknown	Unknown	Unknown	ILLUMINA	NextSeq 500	Blood	Blood	Immune System	True	Blood	Immune System	Holstein	Female
SAMEA4551989	Bos taurus	SINGLE	Unknown	Unknown	Unknown	ILLUMINA	NextSeq 500	Blood	Blood	Immune System	True	Blood	Immune System	Holstein	Female
SAMEA4551990	Bos taurus	SINGLE	Unknown	Unknown	Unknown	ILLUMINA	NextSeq 500	Blood	Blood	Immune System	True	Blood	Immune System	Holstein	Female
SAMEA4551991	Bos taurus	SINGLE	Unknown	Unknown	Unknown	ILLUMINA	NextSeq 500	Blood	Blood	Immune System	True	Blood	Immune System	Holstein	Female
SAMEA4551992	Bos taurus	SINGLE	Unknown	Unknown	Unknown	ILLUMINA	NextSeq 500	Blood	Blood	Immune System	True	Blood	Immune System	Holstein	Female
SAMEA4551993	Bos taurus	SINGLE	Unknown	Unknown	Unknown	ILLUMINA	NextSeq 500	Blood	Blood	Immune System	True	Blood	Immune System	Holstein	Female
SAMEA4551994	Bos taurus	SINGLE	Unknown	Unknown	Unknown	ILLUMINA	NextSeq 500	Blood	Blood	Immune System	True	Blood	Immune System	Holstein	Female
SAMEA4551995	Bos taurus	SINGLE	Unknown	Unknown	Unknown	ILLUMINA	NextSeq 500	Blood	Blood	Immune System	True	Blood	Immune System	Holstein	Female
SAMEA4551996	Bos taurus	SINGLE	Unknown	Unknown	Unknown	ILLUMINA	NextSeq 500	Blood	Blood	Immune System	True	Blood	Immune System	Holstein	Female
SAMEA4551997	Bos taurus	SINGLE	Unknown	Unknown	Unknown	ILLUMINA	NextSeq 500	Blood	Blood	Immune System	True	Blood	Immune System	Holstein	Female
SAMEA4551998	Bos taurus	SINGLE	Unknown	Unknown	Unknown	ILLUMINA	NextSeq 500	Blood	Blood	Immune System	True	Blood	Immune System	Holstein	Female
SAMEA4551999	Bos taurus	SINGLE	Unknown	Unknown	Unknown	ILLUMINA	NextSeq 500	Blood	Blood	Immune System	True	Blood	Immune System	Holstein	Female
SAMEA4552000	Bos taurus	SINGLE	Unknown	Unknown	Unknown	ILLUMINA	NextSeq 500	Blood	Blood	Immune System	True	Blood	Immune System	Holstein	Female
SAMEA4552001	Bos taurus	SINGLE	Unknown	Unknown	Unknown	ILLUMINA	NextSeq 500	Blood	Blood	Immune System	True	Blood	Immune System	Holstein	Female
SAMEA4552002	Bos taurus	SINGLE	Unknown	Unknown	Unknown	ILLUMINA	NextSeq 500	Blood	Blood	Immune System	True	Blood	Immune System	Holstein	Female
SAMEA4552003	Bos taurus	SINGLE	Unknown	Unknown	Unknown	ILLUMINA	NextSeq 500	Blood	Blood	Immune System	True	Blood	Immune System	Holstein	Female
SAMEA4552004	Bos taurus	SINGLE	Unknown	Unknown	Unknown	ILLUMINA	NextSeq 500	Blood	Blood	Immune System	True	Blood	Immune System	Holstein	Female
SAMEA4552005	Bos taurus	SINGLE	Unknown	Unknown	Unknown	ILLUMINA	NextSeq 500	Blood	Blood	Immune System	True	Blood	Immune System	Holstein	Female
SAMEA4552006	Bos taurus	SINGLE	Unknown	Unknown	Unknown	ILLUMINA	NextSeq 500	Blood	Blood	Immune System	True	Blood	Immune System	Holstein	Female
SAMEA4552007	Bos taurus	SINGLE	Unknown	Unknown	Unknown	ILLUMINA	NextSeq 500	Blood	Blood	Immune System	True	Blood	Immune System	Holstein	Female
SAMEA4552008	Bos taurus	SINGLE	Unknown	Unknown	Unknown	ILLUMINA	NextSeq 500	Blood	Blood	Immune System	True	Blood	Immune System	Holstein	Female
SAMEA4552009	Bos taurus	SINGLE	Unknown	Unknown	Unknown	ILLUMINA	NextSeq 500	Blood	Blood	Immune System	True	Blood	Immune System	Holstein	Female
SAMEA4552010	Bos taurus	SINGLE	Unknown	Unknown	Unknown	ILLUMINA	NextSeq 500	Blood	Blood	Immune System	True	Blood	Immune System	Holstein	Female
SAMEA4552011	Bos taurus	SINGLE	Unknown	Unknown	Unknown	ILLUMINA	NextSeq 500	Blood	Blood	Immune System	True	Blood	Immune System	Holstein	Female
SAMEA4552012	Bos taurus	SINGLE	Unknown	Unknown	Unknown	ILLUMINA	NextSeq 500	Blood	Blood	Immune System	True	Blood	Immune System	Holstein	Female
SAMEA4552013	Bos taurus	SINGLE	Unknown	Unknown	Unknown	ILLUMINA	NextSeq 500	Blood	Blood	Immune System	True	Blood	Immune System	Holstein	Female
SAMEA4552014	Bos taurus	SINGLE	Unknown	Unknown	Unknown	ILLUMINA	NextSeq 500	Blood	Blood	Immune System	True	Blood	Immune System	Holstein	Female
SAMEA4675134	Bos taurus	PAIRED	Holstein	2 years	Unknown	ILLUMINA	Illumina Genome Analyzer IIx	Skin	Skin	Integumentary System	True	Skin	Integumentary System	Holstein	Female
SAMEA4675135	Bos taurus	PAIRED	Holstein	2 years	Unknown	ILLUMINA	Illumina Genome Analyzer IIx	Adrenal	Adrenal	Endocrine System	True	Adrenal	Endocrine System	Holstein	Female
SAMEA4675136	Bos taurus	PAIRED	Holstein	2 years	Unknown	ILLUMINA	Illumina Genome Analyzer IIx	Leukocyte	Leukocyte	Immune System	True	Leukocyte	Immune System	Holstein	Female
SAMEA4675137	Bos taurus	PAIRED	Holstein	2 years	Unknown	ILLUMINA	Illumina Genome Analyzer IIx	Lung	Lung	Respiratory System	True	Lung	Respiratory System	Holstein	Female
SAMEA4675138	Bos taurus	PAIRED	Holstein	2 years	Unknown	ILLUMINA	Illumina Genome Analyzer IIx	Thymus	Thymus	Immune System	True	Thymus	Immune System	Holstein	Female
SAMEA4675139	Bos taurus	PAIRED	Holstein	2 years	Unknown	ILLUMINA	Illumina Genome Analyzer IIx	Tongue	Muscle	Muscular System	True	Muscle	Muscular System	Holstein	Female
SAMEA4675140	Bos taurus	PAIRED	Holstein	2 years	Female	ILLUMINA	Illumina Genome Analyzer IIx	Ovary	Ovary	Female Reproductive System	True	Ovary	Female Reproductive System	Holstein	Female
SAMEA4675141	Bos taurus	PAIRED	Holstein	2 years	Unknown	ILLUMINA	Illumina Genome Analyzer IIx	Brain	CNS	Nervous System	True	CNS	Nervous System	Holstein	Female
SAMEA4675142	Bos taurus	PAIRED	Holstein	2 years	Unknown	ILLUMINA	Illumina Genome Analyzer IIx	Kidney	Kidney	Urinary System	True	Kidney	Urinary System	Holstein	Female
SAMEA4675143	Bos taurus	PAIRED	Holstein	2 years	Unknown	ILLUMINA	Illumina Genome Analyzer IIx	Liver	Liver	Liver	True	Liver	Liver	Holstein	Female
SAMEA4675144	Bos taurus	PAIRED	Holstein	2 years	Unknown	ILLUMINA	Illumina Genome Analyzer IIx	Lymph Node	Lymph Node	Immune System	True	Lymph Node	Immune System	Holstein	Female
SAMEA4675145	Bos taurus	PAIRED	Holstein	2 years	Unknown	ILLUMINA	Illumina Genome Analyzer IIx	Spleen	Spleen	Immune System	True	Spleen	Immune System	Holstein	Female
SAMEA4675146	Bos taurus	PAIRED	Holstein	2 years	Unknown	ILLUMINA	Illumina Genome Analyzer IIx	Semimembranosus Muscle	Muscle	Muscular System	True	Muscle	Muscular System	Holstein	Female
SAMEA4675148	Bos taurus	PAIRED	Holstein	2 years	Unknown	ILLUMINA	Illumina Genome Analyzer IIx	Thyroid	Thyroid	Endocrine System	True	Thyroid	Endocrine System	Holstein	Female
SAMEA4675150	Bos taurus	PAIRED	Holstein	2 years	Unknown	ILLUMINA	Illumina Genome Analyzer IIx	Mammary Gland	Mammary Gland	Mammary Gland	True	Mammary Gland	Mammary Gland	Holstein	Female
SAMEA4675151	Bos taurus	PAIRED	Holstein	2 years	Unknown	ILLUMINA	Illumina Genome Analyzer IIx	Heart	Heart	Cardiovascular System	True	Heart	Cardiovascular System	Holstein	Female
SAMEA4675152	Bos taurus	PAIRED	Holstein	2 years	Unknown	ILLUMINA	Illumina Genome Analyzer IIx	Skin	Skin	Integumentary System	True	Skin	Integumentary System	Holstein	Female
SAMEA4675153	Bos taurus	PAIRED	Holstein	2 years	Unknown	ILLUMINA	Illumina Genome Analyzer IIx	Cerebellum	CNS	Nervous System	True	CNS	Nervous System	Holstein	Female
SAMEA4762811	Bos taurus	PAIRED	Limousin	16 months	Male	ILLUMINA	Illumina HiSeq 2000	Longissimus Thoraci Muscle	Muscle	Muscular System	True	Muscle	Muscular System	Limousin	Male
SAMEA4762812	Bos taurus	PAIRED	Limousin	16 months	Male	ILLUMINA	Illumina HiSeq 2000	Longissimus Thoraci Muscle	Muscle	Muscular System	True	Muscle	Muscular System	Limousin	Male
SAMEA4789893	Bos taurus	PAIRED	Unknown	Unknown	Male	ILLUMINA	Illumina HiSeq 2000	Peripheral Blood	Blood	Immune System	Low_quality	Blood	Immune System	Unknown	Male
SAMEA4789894	Bos taurus	PAIRED	Unknown	Unknown	Male	ILLUMINA	Illumina HiSeq 2000	Peripheral Blood	Blood	Immune System	Low_quality	Blood	Immune System	Unknown	Male
SAMEA4789895	Bos taurus	PAIRED	Unknown	Unknown	Male	ILLUMINA	Illumina HiSeq 2000	Peripheral Blood	Blood	Immune System	Low_quality	Blood	Immune System	Unknown	Male
SAMEA4789896	Bos taurus	PAIRED	Unknown	Unknown	Male	ILLUMINA	Illumina HiSeq 2000	Peripheral Blood	Blood	Immune System	Low_quality	Blood	Immune System	Unknown	Male
SAMEA4789897	Bos taurus	PAIRED	Unknown	Unknown	Male	ILLUMINA	Illumina HiSeq 2000	Peripheral Blood	Blood	Immune System	Low_quality	Blood	Immune System	Unknown	Male
SAMEA4789898	Bos taurus	PAIRED	Unknown	Unknown	Male	ILLUMINA	Illumina HiSeq 2000	Peripheral Blood	Blood	Immune System	Low_quality	Blood	Immune System	Unknown	Male
SAMEA4789899	Bos taurus	PAIRED	Unknown	Unknown	Male	ILLUMINA	Illumina HiSeq 2000	Peripheral Blood	Blood	Immune System	Low_quality	Blood	Immune System	Unknown	Male
SAMEA4789900	Bos taurus	PAIRED	Unknown	Unknown	Male	ILLUMINA	Illumina HiSeq 2000	Peripheral Blood	Blood	Immune System	Low_quality	Blood	Immune System	Unknown	Male
SAMEA4789901	Bos taurus	PAIRED	Unknown	Unknown	Male	ILLUMINA	Illumina HiSeq 2000	Peripheral Blood	Blood	Immune System	Low_quality	Blood	Immune System	Unknown	Male
SAMEA4789902	Bos taurus	PAIRED	Unknown	Unknown	Male	ILLUMINA	Illumina HiSeq 2000	Peripheral Blood	Blood	Immune System	Low_quality	Blood	Immune System	Unknown	Male
SAMEA4789903	Bos taurus	PAIRED	Unknown	Unknown	Male	ILLUMINA	Illumina HiSeq 2000	Peripheral Blood	Blood	Immune System	Low_quality	Blood	Immune System	Unknown	Male
SAMEA4789904	Bos taurus	PAIRED	Unknown	Unknown	Male	ILLUMINA	Illumina HiSeq 2000	Peripheral Blood	Blood	Immune System	Low_quality	Blood	Immune System	Unknown	Male
SAMEA4789905	Bos taurus	PAIRED	Unknown	Unknown	Male	ILLUMINA	Illumina HiSeq 2000	Peripheral Blood	Blood	Immune System	Low_quality	Blood	Immune System	Unknown	Male
SAMEA4789906	Bos taurus	PAIRED	Unknown	Unknown	Male	ILLUMINA	Illumina HiSeq 2000	Peripheral Blood	Blood	Immune System	Low_quality	Blood	Immune System	Unknown	Male
SAMEA4789907	Bos taurus	PAIRED	Unknown	Unknown	Male	ILLUMINA	Illumina HiSeq 2000	Peripheral Blood	Blood	Immune System	Low_quality	Blood	Immune System	Unknown	Male
SAMEA4789908	Bos taurus	PAIRED	Unknown	Unknown	Male	ILLUMINA	Illumina HiSeq 2000	Peripheral Blood	Blood	Immune System	Low_quality	Blood	Immune System	Unknown	Male
SAMEA4789909	Bos taurus	PAIRED	Unknown	Unknown	Male	ILLUMINA	Illumina HiSeq 2000	Peripheral Blood	Blood	Immune System	Low_quality	Blood	Immune System	Unknown	Male
SAMEA4789910	Bos taurus	PAIRED	Unknown	Unknown	Male	ILLUMINA	Illumina HiSeq 2000	Peripheral Blood	Blood	Immune System	Low_quality	Blood	Immune System	Unknown	Male
SAMEA4789911	Bos taurus	PAIRED	Unknown	Unknown	Male	ILLUMINA	Illumina HiSeq 2000	Peripheral Blood	Blood	Immune System	Low_quality	Blood	Immune System	Unknown	Male
SAMEA4789912	Bos taurus	PAIRED	Unknown	Unknown	Male	ILLUMINA	Illumina HiSeq 2000	Peripheral Blood	Blood	Immune System	Low_quality	Blood	Immune System	Unknown	Male
SAMEA4789913	Bos taurus	PAIRED	Unknown	Unknown	Male	ILLUMINA	Illumina HiSeq 2000	Peripheral Blood	Blood	Immune System	Low_quality	Blood	Immune System	Unknown	Male
SAMEA4789914	Bos taurus	PAIRED	Unknown	Unknown	Male	ILLUMINA	Illumina HiSeq 2000	Peripheral Blood	Blood	Immune System	Low_quality	Blood	Immune System	Unknown	Male
SAMEA4789915	Bos taurus	PAIRED	Unknown	Unknown	Male	ILLUMINA	Illumina HiSeq 2000	Peripheral Blood	Blood	Immune System	Low_quality	Blood	Immune System	Unknown	Male
SAMEA4789916	Bos taurus	PAIRED	Unknown	Unknown	Male	ILLUMINA	Illumina HiSeq 2000	Peripheral Blood	Blood	Immune System	Low_quality	Blood	Immune System	Unknown	Male
SAMEA4789917	Bos taurus	PAIRED	Unknown	Unknown	Male	ILLUMINA	Illumina HiSeq 2000	Peripheral Blood	Blood	Immune System	Low_quality	Blood	Immune System	Unknown	Male
SAMEA4789919	Bos taurus	PAIRED	Unknown	Unknown	Male	ILLUMINA	Illumina HiSeq 2000	Peripheral Blood	Blood	Immune System	Low_quality	Blood	Immune System	Unknown	Male
SAMEA4789920	Bos taurus	PAIRED	Unknown	Unknown	Male	ILLUMINA	Illumina HiSeq 2000	Peripheral Blood	Blood	Immune System	Low_quality	Blood	Immune System	Unknown	Male
SAMEA4789921	Bos taurus	PAIRED	Unknown	Unknown	Male	ILLUMINA	Illumina HiSeq 2000	Peripheral Blood	Blood	Immune System	Low_quality	Blood	Immune System	Unknown	Male
SAMEA4789922	Bos taurus	PAIRED	Unknown	Unknown	Male	ILLUMINA	Illumina HiSeq 2000	Peripheral Blood	Blood	Immune System	Low_quality	Blood	Immune System	Unknown	Male
SAMEA4789923	Bos taurus	PAIRED	Unknown	Unknown	Male	ILLUMINA	Illumina HiSeq 2000	Peripheral Blood	Blood	Immune System	Low_quality	Blood	Immune System	Unknown	Male
SAMEA4789924	Bos taurus	PAIRED	Unknown	Unknown	Male	ILLUMINA	Illumina HiSeq 2000	Peripheral Blood	Blood	Immune System	Low_quality	Blood	Immune System	Unknown	Male
SAMEA4789925	Bos taurus	PAIRED	Unknown	Unknown	Male	ILLUMINA	Illumina HiSeq 2000	Peripheral Blood	Blood	Immune System	Low_quality	Blood	Immune System	Unknown	Male
SAMEA4789926	Bos taurus	PAIRED	Unknown	Unknown	Male	ILLUMINA	Illumina HiSeq 2000	Peripheral Blood	Blood	Immune System	Low_quality	Blood	Immune System	Unknown	Male
SAMEA4789927	Bos taurus	PAIRED	Unknown	Unknown	Male	ILLUMINA	Illumina HiSeq 2000	Peripheral Blood	Blood	Immune System	Low_quality	Blood	Immune System	Unknown	Male
SAMEA4789928	Bos taurus	PAIRED	Unknown	Unknown	Male	ILLUMINA	Illumina HiSeq 2000	Peripheral Blood	Blood	Immune System	Low_quality	Blood	Immune System	Unknown	Male
SAMEA4789929	Bos taurus	PAIRED	Unknown	Unknown	Male	ILLUMINA	Illumina HiSeq 2000	Peripheral Blood	Blood	Immune System	Low_quality	Blood	Immune System	Unknown	Male
SAMEA4789930	Bos taurus	PAIRED	Unknown	Unknown	Male	ILLUMINA	Illumina HiSeq 2000	Peripheral Blood	Blood	Immune System	Low_quality	Blood	Immune System	Unknown	Male
SAMEA4789931	Bos taurus	PAIRED	Unknown	Unknown	Male	ILLUMINA	Illumina HiSeq 2000	Peripheral Blood	Blood	Immune System	Low_quality	Blood	Immune System	Unknown	Male
SAMEA4789932	Bos taurus	PAIRED	Unknown	Unknown	Male	ILLUMINA	Illumina HiSeq 2000	Peripheral Blood	Blood	Immune System	Low_quality	Blood	Immune System	Unknown	Male
SAMEA4789933	Bos taurus	PAIRED	Unknown	Unknown	Male	ILLUMINA	Illumina HiSeq 2000	Peripheral Blood	Blood	Immune System	Low_quality	Blood	Immune System	Unknown	Male
SAMEA4789934	Bos taurus	PAIRED	Unknown	Unknown	Male	ILLUMINA	Illumina HiSeq 2000	Peripheral Blood	Blood	Immune System	Low_quality	Blood	Immune System	Unknown	Male
SAMEA4789935	Bos taurus	PAIRED	Unknown	Unknown	Male	ILLUMINA	Illumina HiSeq 2000	Peripheral Blood	Blood	Immune System	Low_quality	Blood	Immune System	Unknown	Male
SAMEA4789936	Bos taurus	PAIRED	Unknown	Unknown	Male	ILLUMINA	Illumina HiSeq 2000	Peripheral Blood	Blood	Immune System	Low_quality	Blood	Immune System	Unknown	Male
SAMEA4789937	Bos taurus	PAIRED	Unknown	Unknown	Male	ILLUMINA	Illumina HiSeq 2000	Peripheral Blood	Blood	Immune System	Low_quality	Blood	Immune System	Unknown	Male
SAMEA4789938	Bos taurus	PAIRED	Unknown	Unknown	Male	ILLUMINA	Illumina HiSeq 2000	Peripheral Blood	Blood	Immune System	Low_quality	Blood	Immune System	Unknown	Male
SAMEA4789939	Bos taurus	PAIRED	Unknown	Unknown	Male	ILLUMINA	Illumina HiSeq 2000	Peripheral Blood	Blood	Immune System	Low_quality	Blood	Immune System	Unknown	Male
SAMEA4789940	Bos taurus	PAIRED	Unknown	Unknown	Male	ILLUMINA	Illumina HiSeq 2000	Peripheral Blood	Blood	Immune System	Low_quality	Blood	Immune System	Unknown	Male
SAMEA4789941	Bos taurus	PAIRED	Unknown	Unknown	Male	ILLUMINA	Illumina HiSeq 2000	Peripheral Blood	Blood	Immune System	Low_quality	Blood	Immune System	Unknown	Male
SAMEA4789942	Bos taurus	PAIRED	Unknown	Unknown	Male	ILLUMINA	Illumina HiSeq 2000	Peripheral Blood	Blood	Immune System	Low_quality	Blood	Immune System	Unknown	Male
SAMEA4789943	Bos taurus	PAIRED	Unknown	Unknown	Male	ILLUMINA	Illumina HiSeq 2000	Peripheral Blood	Blood	Immune System	Low_quality	Blood	Immune System	Unknown	Male
SAMEA4819581	Bos taurus	PAIRED	Unknown	Unknown	Female	ILLUMINA	Illumina HiSeq 3000	Blood	Blood	Immune System	True	Blood	Immune System	Holstein	Female
SAMEA4819582	Bos taurus	PAIRED	Unknown	Unknown	Female	ILLUMINA	Illumina HiSeq 3000	Blood	Blood	Immune System	True	Blood	Immune System	Holstein	Female
SAMEA4819583	Bos taurus	PAIRED	Unknown	Unknown	Female	ILLUMINA	Illumina HiSeq 3000	Blood	Blood	Immune System	True	Blood	Immune System	Holstein	Female
SAMEA4819584	Bos taurus	PAIRED	Unknown	Unknown	Female	ILLUMINA	Illumina HiSeq 3000	Blood	Blood	Immune System	True	Blood	Immune System	Holstein	Female
SAMEA4819585	Bos taurus	PAIRED	Unknown	Unknown	Female	ILLUMINA	Illumina HiSeq 3000	Blood	Blood	Immune System	Failed	Blood	Immune System	Unknown	Female
SAMEA4819586	Bos taurus	PAIRED	Unknown	Unknown	Female	ILLUMINA	Illumina HiSeq 3000	Blood	Blood	Immune System	True	Blood	Immune System	Holstein	Female
SAMEA4819587	Bos taurus	PAIRED	Unknown	Unknown	Female	ILLUMINA	Illumina HiSeq 3000	Blood	Blood	Immune System	True	Blood	Immune System	Yakut	Female
SAMEA4819588	Bos taurus	PAIRED	Unknown	Unknown	Female	ILLUMINA	Illumina HiSeq 3000	Blood	Blood	Immune System	True	Blood	Immune System	Yakut	Female
SAMEA4819589	Bos taurus	PAIRED	Unknown	Unknown	Female	ILLUMINA	Illumina HiSeq 3000	Blood	Blood	Immune System	True	Blood	Immune System	Yakut	Female
SAMEA4851284	Bos taurus	PAIRED	Unknown	Unknown	Unknown	ILLUMINA	Illumina HiSeq 3000	Blood	Blood	Immune System	True	Blood	Immune System	Holstein	Male
SAMEA4851285	Bos taurus	PAIRED	Unknown	Unknown	Unknown	ILLUMINA	Illumina HiSeq 3000	Blood	Blood	Immune System	True	Blood	Immune System	Simmental	Male
SAMEA4851286	Bos taurus	PAIRED	Unknown	Unknown	Unknown	ILLUMINA	Illumina HiSeq 3000	Blood	Blood	Immune System	True	Blood	Immune System	Brown Swiss	Male
SAMEA4851287	Bos taurus	PAIRED	Unknown	Unknown	Unknown	ILLUMINA	Illumina HiSeq 3000	Blood	Blood	Immune System	True	Blood	Immune System	Holstein	Male
SAMEA4851288	Bos taurus	PAIRED	Unknown	Unknown	Unknown	ILLUMINA	Illumina HiSeq 3000	Blood	Blood	Immune System	True	Blood	Immune System	Simmental	Male
SAMEA4851289	Bos taurus	PAIRED	Unknown	Unknown	Unknown	ILLUMINA	Illumina HiSeq 3000	Blood	Blood	Immune System	True	Blood	Immune System	Brown Swiss	Male
SAMEA4851290	Bos taurus	PAIRED	Unknown	Unknown	Unknown	ILLUMINA	Illumina HiSeq 3000	Blood	Blood	Immune System	True	Blood	Immune System	Holstein	Female
SAMEA4851291	Bos taurus	PAIRED	Unknown	Unknown	Unknown	ILLUMINA	Illumina HiSeq 3000	Blood	Blood	Immune System	True	Blood	Immune System	Simmental	Female
SAMEA4851292	Bos taurus	PAIRED	Unknown	Unknown	Unknown	ILLUMINA	Illumina HiSeq 3000	Blood	Blood	Immune System	True	Blood	Immune System	Brown Swiss	Female
SAMEA4852426	Bos taurus	SINGLE	Unknown	Unknown	Unknown	ILLUMINA	Illumina HiSeq 3000	Blood	Blood	Immune System	True	Blood	Immune System	Holstein	Female
SAMEA4852427	Bos taurus	SINGLE	Unknown	Unknown	Unknown	ILLUMINA	Illumina HiSeq 3000	Blood	Blood	Immune System	True	Blood	Immune System	Holstein	Female
SAMEA4852428	Bos taurus	SINGLE	Unknown	Unknown	Unknown	ILLUMINA	Illumina HiSeq 3000	Blood	Blood	Immune System	True	Blood	Immune System	Holstein	Female
SAMEA4852429	Bos taurus	SINGLE	Unknown	Unknown	Unknown	ILLUMINA	Illumina HiSeq 3000	Blood	Blood	Immune System	True	Blood	Immune System	Holstein	Female
SAMEA4852430	Bos taurus	SINGLE	Unknown	Unknown	Unknown	ILLUMINA	Illumina HiSeq 3000	Blood	Blood	Immune System	True	Blood	Immune System	Simmental	Female
SAMEA4852431	Bos taurus	SINGLE	Unknown	Unknown	Unknown	ILLUMINA	Illumina HiSeq 3000	Blood	Blood	Immune System	True	Blood	Immune System	Simmental	Female
SAMEA4852432	Bos taurus	SINGLE	Unknown	Unknown	Unknown	ILLUMINA	Illumina HiSeq 3000	Blood	Blood	Immune System	True	Blood	Immune System	Simmental	Female
SAMEA4852433	Bos taurus	SINGLE	Unknown	Unknown	Unknown	ILLUMINA	Illumina HiSeq 3000	Blood	Blood	Immune System	True	Blood	Immune System	Simmental	Female
SAMEA4852434	Bos taurus	SINGLE	Unknown	Unknown	Unknown	ILLUMINA	Illumina HiSeq 3000	Blood	Blood	Immune System	True	Blood	Immune System	Holstein	Female
SAMEA4852435	Bos taurus	SINGLE	Unknown	Unknown	Unknown	ILLUMINA	Illumina HiSeq 3000	Blood	Blood	Immune System	True	Blood	Immune System	Holstein	Female
SAMEA4852436	Bos taurus	SINGLE	Unknown	Unknown	Unknown	ILLUMINA	Illumina HiSeq 3000	Blood	Blood	Immune System	True	Blood	Immune System	Holstein	Female
SAMEA4852437	Bos taurus	SINGLE	Unknown	Unknown	Unknown	ILLUMINA	Illumina HiSeq 3000	Blood	Blood	Immune System	True	Blood	Immune System	Holstein	Female
SAMEA4862008	Bos indicus	PAIRED	Unknown	2 years	Unknown	ILLUMINA	Illumina HiSeq 2500	Pituitary Gland	Pituitary	Nervous System	True	Pituitary	Nervous System	Nelore	Male
SAMEA4862010	Bos indicus	PAIRED	Unknown	2 years	Unknown	ILLUMINA	Illumina HiSeq 2500	Hypothalamus	Hypothalamus	Nervous System	True	Hypothalamus	Nervous System	Nelore	Male
SAMEA4862012	Bos indicus	PAIRED	Unknown	2 years	Unknown	ILLUMINA	Illumina HiSeq 2500	Adrenal	Adrenal	Endocrine System	True	Adrenal	Endocrine System	Nelore	Male
SAMEA4862013	Bos indicus	PAIRED	Unknown	2 years	Unknown	ILLUMINA	Illumina HiSeq 2500	Pituitary Gland	Pituitary	Nervous System	True	Pituitary	Nervous System	Nelore	Male
SAMEA4862015	Bos indicus	PAIRED	Unknown	2 years	Unknown	ILLUMINA	Illumina HiSeq 2500	skeletal muscle tissue	Muscle	Muscular System	True	Muscle	Muscular System	Nelore	Male
SAMEA4862016	Bos indicus	PAIRED	Unknown	2 years	Unknown	ILLUMINA	Illumina HiSeq 2500	Hypothalamus	Hypothalamus	Nervous System	True	Hypothalamus	Nervous System	Nelore	Male
SAMEA4862017	Bos indicus	PAIRED	Unknown	2 years	Unknown	ILLUMINA	Illumina HiSeq 2500	Hypothalamus	Hypothalamus	Nervous System	True	Hypothalamus	Nervous System	Nelore	Male
SAMEA4862018	Bos indicus	PAIRED	Unknown	2 years	Unknown	ILLUMINA	Illumina HiSeq 2500	Liver	Liver	Liver	True	Liver	Liver	Nelore	Male
SAMEA4862019	Bos indicus	PAIRED	Unknown	2 years	Unknown	ILLUMINA	Illumina HiSeq 2500	Liver	Liver	Liver	Low_quality	Liver	Liver	Unknown	Unknown
SAMEA4862020	Bos indicus	PAIRED	Unknown	2 years	Unknown	ILLUMINA	Illumina HiSeq 2500	skeletal muscle tissue	Muscle	Muscular System	True	Muscle	Muscular System	Nelore	Male
SAMEA4862022	Bos indicus	PAIRED	Unknown	2 years	Unknown	ILLUMINA	Illumina HiSeq 2500	Pituitary Gland	Pituitary	Nervous System	True	Pituitary	Nervous System	Nelore	Male
SAMEA4862023	Bos indicus	PAIRED	Unknown	2 years	Unknown	ILLUMINA	Illumina HiSeq 2500	Pituitary Gland	Pituitary	Nervous System	True	Pituitary	Nervous System	Nelore	Male
SAMEA4862024	Bos indicus	PAIRED	Unknown	2 years	Unknown	ILLUMINA	Illumina HiSeq 2500	Hypothalamus	Hypothalamus	Nervous System	True	Hypothalamus	Nervous System	Nelore	Male
SAMEA4862025	Bos indicus	PAIRED	Unknown	2 years	Unknown	ILLUMINA	Illumina HiSeq 2500	Pituitary Gland	Pituitary	Nervous System	True	Pituitary	Nervous System	Nelore	Male
SAMEA4862026	Bos indicus	PAIRED	Unknown	2 years	Unknown	ILLUMINA	Illumina HiSeq 2500	skeletal muscle tissue	Muscle	Muscular System	True	Muscle	Muscular System	Nelore	Male
SAMEA4862027	Bos indicus	PAIRED	Unknown	2 years	Unknown	ILLUMINA	Illumina HiSeq 2500	Hypothalamus	Hypothalamus	Nervous System	True	Hypothalamus	Nervous System	Nelore	Male
SAMEA4862028	Bos indicus	PAIRED	Unknown	2 years	Unknown	ILLUMINA	Illumina HiSeq 2500	skeletal muscle tissue	Muscle	Muscular System	True	Muscle	Muscular System	Nelore	Male
SAMEA4862029	Bos indicus	PAIRED	Unknown	2 years	Unknown	ILLUMINA	Illumina HiSeq 2500	Pituitary Gland	Pituitary	Nervous System	True	Pituitary	Nervous System	Nelore	Male
SAMEA4862030	Bos indicus	PAIRED	Unknown	2 years	Unknown	ILLUMINA	Illumina HiSeq 2500	Hypothalamus	Hypothalamus	Nervous System	True	Hypothalamus	Nervous System	Nelore	Male
SAMEA4862031	Bos indicus	PAIRED	Unknown	2 years	Unknown	ILLUMINA	Illumina HiSeq 2500	Adrenal	Adrenal	Endocrine System	True	Adrenal	Endocrine System	Nelore	Male
SAMEA4862032	Bos indicus	PAIRED	Unknown	2 years	Unknown	ILLUMINA	Illumina HiSeq 2500	Liver	Liver	Liver	Low_quality	Liver	Liver	Unknown	Unknown
SAMEA4862033	Bos indicus	PAIRED	Unknown	2 years	Unknown	ILLUMINA	Illumina HiSeq 2500	Hypothalamus	Hypothalamus	Nervous System	True	Hypothalamus	Nervous System	Nelore	Male
SAMEA4862034	Bos indicus	PAIRED	Unknown	2 years	Unknown	ILLUMINA	Illumina HiSeq 2500	Liver	Liver	Liver	True	Liver	Liver	Nelore	Male
SAMEA4862035	Bos indicus	PAIRED	Unknown	2 years	Unknown	ILLUMINA	Illumina HiSeq 2500	Liver	Liver	Liver	True	Liver	Liver	Nelore	Male
SAMEA4862036	Bos indicus	PAIRED	Unknown	2 years	Unknown	ILLUMINA	Illumina HiSeq 2500	skeletal muscle tissue	Muscle	Muscular System	True	Muscle	Muscular System	Nelore	Male
SAMEA4862037	Bos indicus	PAIRED	Unknown	2 years	Unknown	ILLUMINA	Illumina HiSeq 2500	Pituitary Gland	Pituitary	Nervous System	True	Pituitary	Nervous System	Nelore	Male
SAMEA4862038	Bos indicus	PAIRED	Unknown	2 years	Unknown	ILLUMINA	Illumina HiSeq 2500	skeletal muscle tissue	Muscle	Muscular System	True	Muscle	Muscular System	Nelore	Male
SAMEA4862041	Bos indicus	PAIRED	Unknown	2 years	Unknown	ILLUMINA	Illumina HiSeq 2500	Hypothalamus	Hypothalamus	Nervous System	True	Hypothalamus	Nervous System	Nelore	Male
SAMEA4862043	Bos indicus	PAIRED	Unknown	2 years	Unknown	ILLUMINA	Illumina HiSeq 2500	skeletal muscle tissue	Muscle	Muscular System	True	Muscle	Muscular System	Nelore	Male
SAMEA4862044	Bos indicus	PAIRED	Unknown	2 years	Unknown	ILLUMINA	Illumina HiSeq 2500	Pituitary Gland	Pituitary	Nervous System	True	Pituitary	Nervous System	Nelore	Male
SAMEA4862045	Bos indicus	PAIRED	Unknown	2 years	Unknown	ILLUMINA	Illumina HiSeq 2500	Liver	Liver	Liver	Low_quality	Liver	Liver	Unknown	Unknown
SAMEA4862046	Bos indicus	PAIRED	Unknown	2 years	Unknown	ILLUMINA	Illumina HiSeq 2500	Liver	Liver	Liver	True	Liver	Liver	Nelore	Male
SAMEA4862047	Bos indicus	PAIRED	Unknown	2 years	Unknown	ILLUMINA	Illumina HiSeq 2500	Pituitary Gland	Pituitary	Nervous System	True	Pituitary	Nervous System	Nelore	Male
SAMEA4862049	Bos indicus	PAIRED	Unknown	2 years	Unknown	ILLUMINA	Illumina HiSeq 2500	Liver	Liver	Liver	True	Liver	Liver	Nelore	Male
SAMEA4862050	Bos indicus	PAIRED	Unknown	2 years	Unknown	ILLUMINA	Illumina HiSeq 2500	Pituitary Gland	Pituitary	Nervous System	True	Pituitary	Nervous System	Nelore	Male
SAMEA4862051	Bos indicus	PAIRED	Unknown	2 years	Unknown	ILLUMINA	Illumina HiSeq 2500	Pituitary Gland	Pituitary	Nervous System	True	Pituitary	Nervous System	Nelore	Male
SAMEA4862053	Bos indicus	PAIRED	Unknown	2 years	Unknown	ILLUMINA	Illumina HiSeq 2500	skeletal muscle tissue	Muscle	Muscular System	True	Muscle	Muscular System	Nelore	Male
SAMEA4862054	Bos indicus	PAIRED	Unknown	2 years	Unknown	ILLUMINA	Illumina HiSeq 2500	Liver	Liver	Liver	True	Liver	Liver	Nelore	Male
SAMEA4862055	Bos indicus	PAIRED	Unknown	2 years	Unknown	ILLUMINA	Illumina HiSeq 2500	skeletal muscle tissue	Muscle	Muscular System	True	Muscle	Muscular System	Nelore	Male
SAMEA4862057	Bos indicus	PAIRED	Unknown	2 years	Unknown	ILLUMINA	Illumina HiSeq 2500	Pituitary Gland	Pituitary	Nervous System	True	Pituitary	Nervous System	Nelore	Male
SAMEA4862058	Bos indicus	PAIRED	Unknown	2 years	Unknown	ILLUMINA	Illumina HiSeq 2500	Hypothalamus	Hypothalamus	Nervous System	True	Hypothalamus	Nervous System	Nelore	Male
SAMEA4862060	Bos indicus	PAIRED	Unknown	2 years	Unknown	ILLUMINA	Illumina HiSeq 2500	Liver	Liver	Liver	Low_quality	Liver	Liver	Unknown	Unknown
SAMEA4862061	Bos indicus	PAIRED	Unknown	2 years	Unknown	ILLUMINA	Illumina HiSeq 2500	Hypothalamus	Hypothalamus	Nervous System	Failed	Hypothalamus	Nervous System	Unknown	Unknown
SAMEA4862063	Bos indicus	PAIRED	Unknown	2 years	Unknown	ILLUMINA	Illumina HiSeq 2500	Adrenal	Adrenal	Endocrine System	True	Adrenal	Endocrine System	Nelore	Male
SAMEA4862064	Bos indicus	PAIRED	Unknown	2 years	Unknown	ILLUMINA	Illumina HiSeq 2500	Pituitary Gland	Pituitary	Nervous System	True	Pituitary	Nervous System	Nelore	Male
SAMEA4862065	Bos indicus	PAIRED	Unknown	2 years	Unknown	ILLUMINA	Illumina HiSeq 2500	Hypothalamus	Hypothalamus	Nervous System	True	Hypothalamus	Nervous System	Nelore	Male
SAMEA4862066	Bos indicus	PAIRED	Unknown	2 years	Unknown	ILLUMINA	Illumina HiSeq 2500	Pituitary Gland	Pituitary	Nervous System	True	Pituitary	Nervous System	Nelore	Male
SAMEA4862067	Bos indicus	PAIRED	Unknown	2 years	Unknown	ILLUMINA	Illumina HiSeq 2500	Pituitary Gland	Pituitary	Nervous System	Low_quality	Pituitary	Nervous System	Unknown	Unknown
SAMEA4862068	Bos indicus	PAIRED	Unknown	2 years	Unknown	ILLUMINA	Illumina HiSeq 2500	Adrenal	Adrenal	Endocrine System	True	Adrenal	Endocrine System	Nelore	Male
SAMEA4862069	Bos indicus	PAIRED	Unknown	2 years	Unknown	ILLUMINA	Illumina HiSeq 2500	Hypothalamus	Hypothalamus	Nervous System	Failed	Hypothalamus	Nervous System	Unknown	Unknown
SAMEA4862070	Bos indicus	PAIRED	Unknown	2 years	Unknown	ILLUMINA	Illumina HiSeq 2500	Adrenal	Adrenal	Endocrine System	True	Adrenal	Endocrine System	Nelore	Male
SAMEA4862071	Bos indicus	PAIRED	Unknown	2 years	Unknown	ILLUMINA	Illumina HiSeq 2500	skeletal muscle tissue	Muscle	Muscular System	True	Muscle	Muscular System	Nelore	Male
SAMEA4862072	Bos indicus	PAIRED	Unknown	2 years	Unknown	ILLUMINA	Illumina HiSeq 2500	Adrenal	Adrenal	Endocrine System	True	Adrenal	Endocrine System	Nelore	Male
SAMEA4862074	Bos indicus	PAIRED	Unknown	2 years	Unknown	ILLUMINA	Illumina HiSeq 2500	skeletal muscle tissue	Muscle	Muscular System	True	Muscle	Muscular System	Nelore	Male
SAMEA4862075	Bos indicus	PAIRED	Unknown	2 years	Unknown	ILLUMINA	Illumina HiSeq 2500	Adrenal	Adrenal	Endocrine System	True	Adrenal	Endocrine System	Nelore	Male
SAMEA4862076	Bos indicus	PAIRED	Unknown	2 years	Unknown	ILLUMINA	Illumina HiSeq 2500	Adrenal	Adrenal	Endocrine System	True	Adrenal	Endocrine System	Nelore	Male
SAMEA4862077	Bos indicus	PAIRED	Unknown	2 years	Unknown	ILLUMINA	Illumina HiSeq 2500	Hypothalamus	Hypothalamus	Nervous System	True	Hypothalamus	Nervous System	Nelore	Male
SAMEA4862079	Bos indicus	PAIRED	Unknown	2 years	Unknown	ILLUMINA	Illumina HiSeq 2500	skeletal muscle tissue	Muscle	Muscular System	True	Muscle	Muscular System	Nelore	Male
SAMEA4862080	Bos indicus	PAIRED	Unknown	2 years	Unknown	ILLUMINA	Illumina HiSeq 2500	Pituitary Gland	Pituitary	Nervous System	True	Pituitary	Nervous System	Nelore	Male
SAMEA4862081	Bos indicus	PAIRED	Unknown	2 years	Unknown	ILLUMINA	Illumina HiSeq 2500	Hypothalamus	Hypothalamus	Nervous System	Failed	Hypothalamus	Nervous System	Unknown	Unknown
SAMEA4862083	Bos indicus	PAIRED	Unknown	2 years	Unknown	ILLUMINA	Illumina HiSeq 2500	skeletal muscle tissue	Muscle	Muscular System	True	Muscle	Muscular System	Nelore	Male
SAMEA4862084	Bos indicus	PAIRED	Unknown	2 years	Unknown	ILLUMINA	Illumina HiSeq 2500	Hypothalamus	Hypothalamus	Nervous System	True	Hypothalamus	Nervous System	Nelore	Male
SAMEA4862085	Bos indicus	PAIRED	Unknown	2 years	Unknown	ILLUMINA	Illumina HiSeq 2500	Liver	Liver	Liver	Low_quality	Liver	Liver	Unknown	Unknown
SAMEA4862086	Bos indicus	PAIRED	Unknown	2 years	Unknown	ILLUMINA	Illumina HiSeq 2500	skeletal muscle tissue	Muscle	Muscular System	True	Muscle	Muscular System	Nelore	Male
SAMEA4862087	Bos indicus	PAIRED	Unknown	2 years	Unknown	ILLUMINA	Illumina HiSeq 2500	Hypothalamus	Hypothalamus	Nervous System	True	Hypothalamus	Nervous System	Nelore	Male
SAMEA4862088	Bos indicus	PAIRED	Unknown	2 years	Unknown	ILLUMINA	Illumina HiSeq 2500	skeletal muscle tissue	Muscle	Muscular System	True	Muscle	Muscular System	Nelore	Male
SAMEA4862089	Bos indicus	PAIRED	Unknown	2 years	Unknown	ILLUMINA	Illumina HiSeq 2500	Adrenal	Adrenal	Endocrine System	True	Adrenal	Endocrine System	Nelore	Male
SAMEA4862090	Bos indicus	PAIRED	Unknown	2 years	Unknown	ILLUMINA	Illumina HiSeq 2500	Pituitary Gland	Pituitary	Nervous System	True	Pituitary	Nervous System	Nelore	Male
SAMEA4862091	Bos indicus	PAIRED	Unknown	2 years	Unknown	ILLUMINA	Illumina HiSeq 2500	Liver	Liver	Liver	Low_quality	Liver	Liver	Unknown	Unknown
SAMEA4862092	Bos indicus	PAIRED	Unknown	2 years	Unknown	ILLUMINA	Illumina HiSeq 2500	Adrenal	Adrenal	Endocrine System	True	Adrenal	Endocrine System	Nelore	Male
SAMEA4862094	Bos indicus	PAIRED	Unknown	2 years	Unknown	ILLUMINA	Illumina HiSeq 2500	Liver	Liver	Liver	Low_quality	Liver	Liver	Unknown	Unknown
SAMEA4862095	Bos indicus	PAIRED	Unknown	2 years	Unknown	ILLUMINA	Illumina HiSeq 2500	Adrenal	Adrenal	Endocrine System	True	Adrenal	Endocrine System	Nelore	Male
SAMEA4862096	Bos indicus	PAIRED	Unknown	2 years	Unknown	ILLUMINA	Illumina HiSeq 2500	Adrenal	Adrenal	Endocrine System	True	Adrenal	Endocrine System	Nelore	Male
SAMEA4862097	Bos indicus	PAIRED	Unknown	2 years	Unknown	ILLUMINA	Illumina HiSeq 2500	Pituitary Gland	Pituitary	Nervous System	True	Pituitary	Nervous System	Nelore	Male
SAMEA4862098	Bos indicus	PAIRED	Unknown	2 years	Unknown	ILLUMINA	Illumina HiSeq 2500	Adrenal	Adrenal	Endocrine System	True	Adrenal	Endocrine System	Nelore	Male
SAMEA4862099	Bos indicus	PAIRED	Unknown	2 years	Unknown	ILLUMINA	Illumina HiSeq 2500	Adrenal	Adrenal	Endocrine System	True	Adrenal	Endocrine System	Nelore	Male
SAMEA4862100	Bos indicus	PAIRED	Unknown	2 years	Unknown	ILLUMINA	Illumina HiSeq 2500	Liver	Liver	Liver	True	Liver	Liver	Nelore	Male
SAMEA4862101	Bos indicus	PAIRED	Unknown	2 years	Unknown	ILLUMINA	Illumina HiSeq 2500	Adrenal	Adrenal	Endocrine System	True	Adrenal	Endocrine System	Nelore	Male
SAMEA4862102	Bos indicus	PAIRED	Unknown	2 years	Unknown	ILLUMINA	Illumina HiSeq 2500	Liver	Liver	Liver	Low_quality	Liver	Liver	Unknown	Unknown
SAMEA4862103	Bos indicus	PAIRED	Unknown	2 years	Unknown	ILLUMINA	Illumina HiSeq 2500	Liver	Liver	Liver	True	Liver	Liver	Nelore	Male
SAMEA4862105	Bos indicus	PAIRED	Unknown	2 years	Unknown	ILLUMINA	Illumina HiSeq 2500	skeletal muscle tissue	Muscle	Muscular System	True	Muscle	Muscular System	Nelore	Male
SAMEA4862106	Bos indicus	PAIRED	Unknown	2 years	Unknown	ILLUMINA	Illumina HiSeq 2500	Hypothalamus	Hypothalamus	Nervous System	True	Hypothalamus	Nervous System	Nelore	Male
SAMEA4862107	Bos indicus	PAIRED	Unknown	2 years	Unknown	ILLUMINA	Illumina HiSeq 2500	Liver	Liver	Liver	True	Liver	Liver	Nelore	Male
SAMEA4862108	Bos indicus	PAIRED	Unknown	2 years	Unknown	ILLUMINA	Illumina HiSeq 2500	Liver	Liver	Liver	Low_quality	Liver	Liver	Unknown	Unknown
SAMEA4862109	Bos indicus	PAIRED	Unknown	2 years	Unknown	ILLUMINA	Illumina HiSeq 2500	Hypothalamus	Hypothalamus	Nervous System	True	Hypothalamus	Nervous System	Nelore	Male
SAMEA4862110	Bos indicus	PAIRED	Unknown	2 years	Unknown	ILLUMINA	Illumina HiSeq 2500	skeletal muscle tissue	Muscle	Muscular System	True	Muscle	Muscular System	Nelore	Male
SAMEA4999482	Bos taurus	SINGLE	Unknown	110 days	Unknown	ILLUMINA	NextSeq 500	Blood	Blood	Immune System	True	Blood	Immune System	Angus	Male
SAMEA4999485	Bos taurus	PAIRED	Unknown	107 days	Unknown	ILLUMINA	NextSeq 500	Skeletal Muscle	Muscle	Muscular System	True	Muscle	Muscular System	Angus	Female
SAMEA4999487	Bos taurus	PAIRED	Unknown	112 days	Unknown	ILLUMINA	NextSeq 500	Skeletal Muscle	Muscle	Muscular System	True	Muscle	Muscular System	Angus	Female
SAMEA4999488	Bos taurus	SINGLE	Unknown	107 days	Unknown	ILLUMINA	NextSeq 500	Blood	Blood	Immune System	True	Blood	Immune System	Angus	Male
SAMEA4999489	Bos taurus	SINGLE	Unknown	107 days	Unknown	ILLUMINA	NextSeq 500	Blood	Blood	Immune System	True	Blood	Immune System	Angus	Male
SAMEA4999493	Bos taurus	SINGLE	Unknown	46 days	Unknown	ILLUMINA	NextSeq 500	Blood	Blood	Immune System	True	Blood	Immune System	Angus	Male
SAMEA4999494	Bos taurus	SINGLE	Unknown	108 days	Unknown	ILLUMINA	NextSeq 500	Blood	Blood	Immune System	True	Blood	Immune System	Angus	Male
SAMEA4999496	Bos taurus	SINGLE	Unknown	110 days	Unknown	ILLUMINA	NextSeq 500	Blood	Blood	Immune System	True	Blood	Immune System	Angus	Male
SAMEA4999498	Bos taurus	SINGLE	Unknown	46 days	Unknown	ILLUMINA	NextSeq 500	Blood	Blood	Immune System	True	Blood	Immune System	Angus	Male
SAMEA4999499	Bos taurus	SINGLE	Unknown	107 days	Unknown	ILLUMINA	NextSeq 500	Blood	Blood	Immune System	True	Blood	Immune System	Angus	Male
SAMEA4999502	Bos taurus	SINGLE	Unknown	113 days	Unknown	ILLUMINA	NextSeq 500	Blood	Blood	Immune System	True	Blood	Immune System	Angus	Male
SAMEA4999504	Bos taurus	SINGLE	Unknown	108 days	Unknown	ILLUMINA	NextSeq 500	Blood	Blood	Immune System	True	Blood	Immune System	Angus	Male
SAMEA4999505	Bos taurus	PAIRED	Unknown	110 years	Unknown	ILLUMINA	NextSeq 500	Skeletal Muscle	Muscle	Muscular System	True	Muscle	Muscular System	Angus	Female
SAMEA4999512	Bos taurus	PAIRED	Unknown	109 days	Unknown	ILLUMINA	NextSeq 500	Skeletal Muscle	Muscle	Muscular System	True	Muscle	Muscular System	Angus	Male
SAMEA4999513	Bos taurus	SINGLE	Unknown	107 days	Unknown	ILLUMINA	NextSeq 500	Blood	Blood	Immune System	True	Blood	Immune System	Angus	Male
SAMEA4999517	Bos taurus	SINGLE	Unknown	113 days	Unknown	ILLUMINA	NextSeq 500	Blood	Blood	Immune System	True	Blood	Immune System	Angus	Male
SAMEA4999518	Bos taurus	PAIRED	Unknown	111 days	Unknown	ILLUMINA	NextSeq 500	Skeletal Muscle	Muscle	Muscular System	True	Muscle	Muscular System	Angus	Female
SAMEA4999520	Bos taurus	PAIRED	Unknown	109 days	Unknown	ILLUMINA	NextSeq 500	Skeletal Muscle	Muscle	Muscular System	True	Muscle	Muscular System	Angus	Female
SAMEA4999521	Bos taurus	PAIRED	Unknown	108 days	Unknown	ILLUMINA	NextSeq 500	Skeletal Muscle	Muscle	Muscular System	True	Muscle	Muscular System	Angus	Male
SAMEA4999523	Bos taurus	SINGLE	Unknown	110 days	Unknown	ILLUMINA	NextSeq 500	Blood	Blood	Immune System	True	Blood	Immune System	Angus	Male
SAMEA4999524	Bos taurus	SINGLE	Unknown	46 days	Unknown	ILLUMINA	NextSeq 500	Blood	Blood	Immune System	True	Blood	Immune System	Angus	Male
SAMEA4999526	Bos taurus	SINGLE	Unknown	108 days	Unknown	ILLUMINA	NextSeq 500	Blood	Blood	Immune System	True	Blood	Immune System	Angus	Male
SAMEA4999527	Bos taurus	SINGLE	Unknown	108 days	Unknown	ILLUMINA	NextSeq 500	Blood	Blood	Immune System	True	Blood	Immune System	Angus	Male
SAMEA4999528	Bos taurus	SINGLE	Unknown	110 days	Unknown	ILLUMINA	NextSeq 500	Blood	Blood	Immune System	True	Blood	Immune System	Angus	Male
SAMEA4999529	Bos taurus	SINGLE	Unknown	113 days	Unknown	ILLUMINA	NextSeq 500	Blood	Blood	Immune System	True	Blood	Immune System	Angus	Male
SAMEA4999530	Bos taurus	SINGLE	Unknown	107 days	Unknown	ILLUMINA	NextSeq 500	Blood	Blood	Immune System	True	Blood	Immune System	Angus	Male
SAMEA4999531	Bos taurus	PAIRED	Unknown	46 days	Unknown	ILLUMINA	NextSeq 500	Skeletal Muscle	Muscle	Muscular System	True	Muscle	Muscular System	Angus	Male
SAMEA4999533	Bos taurus	PAIRED	Unknown	104 days	Unknown	ILLUMINA	NextSeq 500	Skeletal Muscle	Muscle	Muscular System	True	Muscle	Muscular System	Angus	Male
SAMEA4999536	Bos taurus	SINGLE	Unknown	61 days	Unknown	ILLUMINA	NextSeq 500	Blood	Blood	Immune System	True	Blood	Immune System	Angus	Male
SAMEA4999540	Bos taurus	SINGLE	Unknown	46 days	Unknown	ILLUMINA	NextSeq 500	Blood	Blood	Immune System	True	Blood	Immune System	Angus	Male
SAMEA4999541	Bos taurus	SINGLE	Unknown	107 days	Unknown	ILLUMINA	NextSeq 500	Blood	Blood	Immune System	True	Blood	Immune System	Angus	Male
SAMEA4999542	Bos taurus	SINGLE	Unknown	61 days	Unknown	ILLUMINA	NextSeq 500	Blood	Blood	Immune System	True	Blood	Immune System	Angus	Male
SAMEA4999543	Bos taurus	PAIRED	Unknown	106 days	Unknown	ILLUMINA	NextSeq 500	Skeletal Muscle	Muscle	Muscular System	True	Muscle	Muscular System	Angus	Female
SAMEA4999545	Bos taurus	SINGLE	Unknown	104 days	Unknown	ILLUMINA	NextSeq 500	Blood	Blood	Immune System	True	Blood	Immune System	Angus	Male
SAMEA4999546	Bos taurus	PAIRED	Unknown	107 days	Unknown	ILLUMINA	NextSeq 500	Skeletal Muscle	Muscle	Muscular System	True	Muscle	Muscular System	Angus	Male
SAMEA4999548	Bos taurus	PAIRED	Unknown	110 days	Unknown	ILLUMINA	NextSeq 500	Skeletal Muscle	Muscle	Muscular System	True	Muscle	Muscular System	Angus	Male
SAMEA4999550	Bos taurus	SINGLE	Unknown	104 days	Unknown	ILLUMINA	NextSeq 500	Blood	Blood	Immune System	True	Blood	Immune System	Angus	Male
SAMEA4999554	Bos taurus	SINGLE	Unknown	109 days	Unknown	ILLUMINA	NextSeq 500	Blood	Blood	Immune System	True	Blood	Immune System	Angus	Male
SAMEA4999555	Bos taurus	SINGLE	Unknown	108 days	Unknown	ILLUMINA	NextSeq 500	Blood	Blood	Immune System	True	Blood	Immune System	Angus	Male
SAMEA4999556	Bos taurus	SINGLE	Unknown	107 days	Unknown	ILLUMINA	NextSeq 500	Blood	Blood	Immune System	True	Blood	Immune System	Angus	Male
SAMEA4999557	Bos taurus	PAIRED	Unknown	109 days	Unknown	ILLUMINA	NextSeq 500	Skeletal Muscle	Muscle	Muscular System	True	Muscle	Muscular System	Angus	Female
SAMEA4999559	Bos taurus	SINGLE	Unknown	113 days	Unknown	ILLUMINA	NextSeq 500	Blood	Blood	Immune System	True	Blood	Immune System	Angus	Male
SAMEA4999561	Bos taurus	PAIRED	Unknown	61 days	Unknown	ILLUMINA	NextSeq 500	Skeletal Muscle	Muscle	Muscular System	True	Muscle	Muscular System	Angus	Male
SAMEA4999562	Bos taurus	SINGLE	Unknown	107 days	Unknown	ILLUMINA	NextSeq 500	Blood	Blood	Immune System	True	Blood	Immune System	Angus	Male
SAMEA4999565	Bos taurus	PAIRED	Unknown	113 days	Unknown	ILLUMINA	NextSeq 500	Skeletal Muscle	Muscle	Muscular System	True	Muscle	Muscular System	Angus	Female
SAMEA4999566	Bos taurus	SINGLE	Unknown	104 days	Unknown	ILLUMINA	NextSeq 500	Blood	Blood	Immune System	True	Blood	Immune System	Angus	Male
SAMEA4999567	Bos taurus	PAIRED	Unknown	113 days	Unknown	ILLUMINA	NextSeq 500	Skeletal Muscle	Muscle	Muscular System	True	Muscle	Muscular System	Angus	Male
SAMEA4999568	Bos taurus	PAIRED	Unknown	108 days	Unknown	ILLUMINA	NextSeq 500	Skeletal Muscle	Muscle	Muscular System	True	Muscle	Muscular System	Angus	Male
SAMEA4999570	Bos taurus	SINGLE	Unknown	107 days	Unknown	ILLUMINA	NextSeq 500	Blood	Blood	Immune System	True	Blood	Immune System	Angus	Male
SAMEA4999572	Bos taurus	SINGLE	Unknown	109 days	Unknown	ILLUMINA	NextSeq 500	Blood	Blood	Immune System	True	Blood	Immune System	Angus	Male
SAMEA4999574	Bos taurus	PAIRED	Unknown	110 days	Unknown	ILLUMINA	NextSeq 500	Skeletal Muscle	Muscle	Muscular System	True	Muscle	Muscular System	Angus	Male
SAMEA4999575	Bos taurus	PAIRED	Unknown	107 days	Unknown	ILLUMINA	NextSeq 500	Skeletal Muscle	Muscle	Muscular System	True	Muscle	Muscular System	Angus	Male
SAMEA4999578	Bos taurus	SINGLE	Unknown	109 days	Unknown	ILLUMINA	NextSeq 500	Blood	Blood	Immune System	True	Blood	Immune System	Angus	Male
SAMEA4999579	Bos taurus	PAIRED	Unknown	108 days	Unknown	ILLUMINA	NextSeq 500	Skeletal Muscle	Muscle	Muscular System	True	Muscle	Muscular System	Angus	Male
SAMEA4999583	Bos taurus	SINGLE	Unknown	104 days	Unknown	ILLUMINA	NextSeq 500	Blood	Blood	Immune System	True	Blood	Immune System	Angus	Female
SAMEA4999584	Bos taurus	SINGLE	Unknown	108 days	Unknown	ILLUMINA	NextSeq 500	Blood	Blood	Immune System	True	Blood	Immune System	Angus	Male
SAMEA4999588	Bos taurus	SINGLE	Unknown	107 days	Unknown	ILLUMINA	NextSeq 500	Blood	Blood	Immune System	True	Blood	Immune System	Angus	Male
SAMEA4999589	Bos taurus	PAIRED	Unknown	83 days	Unknown	ILLUMINA	NextSeq 500	Skeletal Muscle	Muscle	Muscular System	True	Muscle	Muscular System	Angus	Male
SAMEA4999592	Bos taurus	SINGLE	Unknown	107 days	Unknown	ILLUMINA	NextSeq 500	Blood	Blood	Immune System	True	Blood	Immune System	Angus	Male
SAMEA4999593	Bos taurus	SINGLE	Unknown	107 days	Unknown	ILLUMINA	NextSeq 500	Blood	Blood	Immune System	True	Blood	Immune System	Angus	Male
SAMEA4999594	Bos taurus	SINGLE	Unknown	104 days	Unknown	ILLUMINA	NextSeq 500	Blood	Blood	Immune System	True	Blood	Immune System	Angus	Male
SAMEA4999597	Bos taurus	SINGLE	Unknown	108 days	Unknown	ILLUMINA	NextSeq 500	Blood	Blood	Immune System	True	Blood	Immune System	Angus	Male
SAMEA4999600	Bos taurus	SINGLE	Unknown	61 days	Unknown	ILLUMINA	NextSeq 500	Blood	Blood	Immune System	True	Blood	Immune System	Angus	Male
SAMEA4999604	Bos taurus	SINGLE	Unknown	109 days	Unknown	ILLUMINA	NextSeq 500	Blood	Blood	Immune System	True	Blood	Immune System	Angus	Male
SAMEA4999605	Bos taurus	SINGLE	Unknown	107 days	Unknown	ILLUMINA	NextSeq 500	Blood	Blood	Immune System	True	Blood	Immune System	Angus	Male
SAMEA4999607	Bos taurus	SINGLE	Unknown	108 days	Unknown	ILLUMINA	NextSeq 500	Blood	Blood	Immune System	True	Blood	Immune System	Angus	Male
SAMEA4999608	Bos taurus	PAIRED	Unknown	107 days	Unknown	ILLUMINA	NextSeq 500	Skeletal Muscle	Muscle	Muscular System	True	Muscle	Muscular System	Angus	Male
SAMEA4999610	Bos taurus	PAIRED	Unknown	113 days	Unknown	ILLUMINA	NextSeq 500	Skeletal Muscle	Muscle	Muscular System	True	Muscle	Muscular System	Angus	Female
SAMEA4999611	Bos taurus	SINGLE	Unknown	107 days	Unknown	ILLUMINA	NextSeq 500	Blood	Blood	Immune System	True	Blood	Immune System	Angus	Male
SAMEA4999613	Bos taurus	SINGLE	Unknown	107 days	Unknown	ILLUMINA	NextSeq 500	Blood	Blood	Immune System	True	Blood	Immune System	Angus	Male
SAMEA5160178	Bos taurus	PAIRED	Holstein	Unknown	Female	ILLUMINA	Illumina HiSeq 2500	Lactating Mammary Gland	Mammary Gland	Mammary Gland	True	Mammary Gland	Mammary Gland	Holstein	Female
SAMEA5160179	Bos taurus	PAIRED	Holstein	Unknown	Female	ILLUMINA	Illumina HiSeq 2500	Lactating Mammary Gland	Mammary Gland	Mammary Gland	True	Mammary Gland	Mammary Gland	Holstein	Female
SAMEA5160180	Bos taurus	PAIRED	Holstein	Unknown	Female	ILLUMINA	Illumina HiSeq 2500	Lactating Mammary Gland	Mammary Gland	Mammary Gland	True	Mammary Gland	Mammary Gland	Holstein	Female
SAMEA5160181	Bos taurus	PAIRED	Holstein	Unknown	Female	ILLUMINA	Illumina HiSeq 2500	Lactating Mammary Gland	Mammary Gland	Mammary Gland	True	Mammary Gland	Mammary Gland	Holstein	Female
SAMEA5160182	Bos taurus	PAIRED	Holstein	Unknown	Female	ILLUMINA	Illumina HiSeq 2500	Lactating Mammary Gland	Mammary Gland	Mammary Gland	True	Mammary Gland	Mammary Gland	Holstein	Female
SAMEA5160183	Bos taurus	PAIRED	Holstein	Unknown	Female	ILLUMINA	Illumina HiSeq 2500	Lactating Mammary Gland	Mammary Gland	Mammary Gland	True	Mammary Gland	Mammary Gland	Holstein	Female
SAMEA5160184	Bos taurus	PAIRED	Holstein	Unknown	Female	ILLUMINA	Illumina HiSeq 2500	Lactating Mammary Gland	Mammary Gland	Mammary Gland	True	Mammary Gland	Mammary Gland	Holstein	Female
SAMEA5160185	Bos taurus	PAIRED	Holstein	Unknown	Female	ILLUMINA	Illumina HiSeq 2500	Lactating Mammary Gland	Mammary Gland	Mammary Gland	True	Mammary Gland	Mammary Gland	Holstein	Female
SAMEA5160186	Bos taurus	PAIRED	Holstein	Unknown	Female	ILLUMINA	Illumina HiSeq 2500	Lactating Mammary Gland	Mammary Gland	Mammary Gland	True	Mammary Gland	Mammary Gland	Holstein	Female
SAMEA5160187	Bos taurus	PAIRED	Holstein	Unknown	Female	ILLUMINA	Illumina HiSeq 2500	Lactating Mammary Gland	Mammary Gland	Mammary Gland	True	Mammary Gland	Mammary Gland	Holstein	Female
SAMEA5160188	Bos taurus	PAIRED	Holstein	Unknown	Female	ILLUMINA	Illumina HiSeq 2500	Lactating Mammary Gland	Mammary Gland	Mammary Gland	True	Mammary Gland	Mammary Gland	Holstein	Female
SAMEA5160189	Bos taurus	PAIRED	Holstein	Unknown	Female	ILLUMINA	Illumina HiSeq 2500	Lactating Mammary Gland	Mammary Gland	Mammary Gland	True	Mammary Gland	Mammary Gland	Holstein	Female
SAMEA5160190	Bos taurus	PAIRED	Holstein	Unknown	Female	ILLUMINA	Illumina HiSeq 2500	Lactating Mammary Gland	Mammary Gland	Mammary Gland	True	Mammary Gland	Mammary Gland	Holstein	Female
SAMEA5160191	Bos taurus	PAIRED	Holstein	Unknown	Female	ILLUMINA	Illumina HiSeq 2500	Lactating Mammary Gland	Mammary Gland	Mammary Gland	Failed	Mammary Gland	Mammary Gland	Holstein	Female
SAMEA5160192	Bos taurus	PAIRED	Holstein	Unknown	Female	ILLUMINA	Illumina HiSeq 2500	Lactating Mammary Gland	Mammary Gland	Mammary Gland	Failed	Mammary Gland	Mammary Gland	Holstein	Female
SAMEA5160193	Bos taurus	PAIRED	Holstein	Unknown	Female	ILLUMINA	Illumina HiSeq 2500	Lactating Mammary Gland	Mammary Gland	Mammary Gland	True	Mammary Gland	Mammary Gland	Holstein	Female
SAMEA5160194	Bos taurus	PAIRED	Holstein	Unknown	Female	ILLUMINA	Illumina HiSeq 2500	Lactating Mammary Gland	Mammary Gland	Mammary Gland	True	Mammary Gland	Mammary Gland	Holstein	Female
SAMEA5160195	Bos taurus	PAIRED	Holstein	Unknown	Female	ILLUMINA	Illumina HiSeq 2500	Lactating Mammary Gland	Mammary Gland	Mammary Gland	True	Mammary Gland	Mammary Gland	Holstein	Female
SAMEA5228024	Bos taurus	SINGLE	Swedish Red	Adult	Male	ION_TORRENT	Ion S5 XL	Epithelial Cell	Soft Palate	Digestive System	True	Soft Palate	Digestive System	Swedish Red	Male
SAMEA5228025	Bos taurus	SINGLE	Swedish Red	Adult	Male	ION_TORRENT	Ion S5 XL	Epithelial Cell	Soft Palate	Digestive System	True	Soft Palate	Digestive System	Swedish Red	Male
SAMEA5228026	Bos taurus	SINGLE	Swedish Red	Adult	Male	ION_TORRENT	Ion S5 XL	Epithelial Cell	Soft Palate	Digestive System	True	Soft Palate	Digestive System	Swedish Red	Male
SAMEA5228027	Bos taurus	SINGLE	Swedish Red	Adult	Male	ION_TORRENT	Ion S5 XL	Epithelial Cell	Soft Palate	Digestive System	True	Soft Palate	Digestive System	Swedish Red	Male
SAMEA5228028	Bos taurus	SINGLE	Swedish Red	Adult	Male	ION_TORRENT	Ion S5 XL	Epithelial Cell	Soft Palate	Digestive System	True	Soft Palate	Digestive System	Swedish Red	Male
SAMEA5228029	Bos taurus	SINGLE	Swedish Red	Adult	Male	ION_TORRENT	Ion S5 XL	Epithelial Cell	Soft Palate	Digestive System	True	Soft Palate	Digestive System	Swedish Red	Male
SAMEA5228030	Bos taurus	SINGLE	Swedish Red	Adult	Male	ION_TORRENT	Ion S5 XL	Epithelial Cell	Soft Palate	Digestive System	True	Soft Palate	Digestive System	Swedish Red	Male
SAMEA5228031	Bos taurus	SINGLE	Swedish Red	Adult	Male	ION_TORRENT	Ion S5 XL	Epithelial Cell	Soft Palate	Digestive System	True	Soft Palate	Digestive System	Swedish Red	Male
SAMEA5228032	Bos taurus	SINGLE	Swedish Red	Adult	Male	ION_TORRENT	Ion S5 XL	Epithelial Cell	Soft Palate	Digestive System	True	Soft Palate	Digestive System	Swedish Red	Male
SAMEA5228033	Bos taurus	SINGLE	Swedish Red	Adult	Male	ION_TORRENT	Ion S5 XL	Epithelial Cell	Soft Palate	Digestive System	True	Soft Palate	Digestive System	Swedish Red	Male
SAMEA5228034	Bos taurus	SINGLE	Swedish Red	Adult	Male	ION_TORRENT	Ion S5 XL	Epithelial Cell	Soft Palate	Digestive System	True	Soft Palate	Digestive System	Swedish Red	Male
SAMEA5228035	Bos taurus	SINGLE	Swedish Red	Adult	Female	ION_TORRENT	Ion S5 XL	Epithelial Cell	Soft Palate	Digestive System	True	Soft Palate	Digestive System	Swedish Red	Female
SAMEA5228036	Bos taurus	SINGLE	Swedish Red	Adult	Female	ION_TORRENT	Ion S5 XL	Epithelial Cell	Soft Palate	Digestive System	True	Soft Palate	Digestive System	Swedish Red	Female
SAMEA5228037	Bos taurus	SINGLE	Swedish Red	Adult	Female	ION_TORRENT	Ion S5 XL	Epithelial Cell	Soft Palate	Digestive System	True	Soft Palate	Digestive System	Swedish Red	Female
SAMEA5228038	Bos taurus	SINGLE	Swedish Red	Adult	Female	ION_TORRENT	Ion S5 XL	Epithelial Cell	Soft Palate	Digestive System	True	Soft Palate	Digestive System	Swedish Red	Female
SAMEA5228039	Bos taurus	SINGLE	Swedish Red	Adult	Female	ION_TORRENT	Ion S5 XL	Epithelial Cell	Soft Palate	Digestive System	True	Soft Palate	Digestive System	Swedish Red	Female
SAMEA5228040	Bos taurus	SINGLE	Swedish Red	Adult	Female	ION_TORRENT	Ion S5 XL	Epithelial Cell	Soft Palate	Digestive System	True	Soft Palate	Digestive System	Swedish Red	Female
SAMEA5228041	Bos taurus	SINGLE	Swedish Red	Adult	Female	ION_TORRENT	Ion S5 XL	Epithelial Cell	Soft Palate	Digestive System	True	Soft Palate	Digestive System	Swedish Red	Female
SAMEA5228042	Bos taurus	SINGLE	Swedish Red	Adult	Female	ION_TORRENT	Ion S5 XL	Epithelial Cell	Soft Palate	Digestive System	True	Soft Palate	Digestive System	Swedish Red	Female
SAMEA5228043	Bos taurus	SINGLE	Swedish Red	Adult	Female	ION_TORRENT	Ion S5 XL	Epithelial Cell	Soft Palate	Digestive System	True	Soft Palate	Digestive System	Swedish Red	Female
SAMEA5228044	Bos taurus	SINGLE	Swedish Red	Adult	Female	ION_TORRENT	Ion S5 XL	Epithelial Cell	Soft Palate	Digestive System	True	Soft Palate	Digestive System	Swedish Red	Female
SAMEA5262714	Bos taurus	PAIRED	Unknown	Unknown	Unknown	ILLUMINA	Illumina HiSeq 2500	Macrophage	Macrophage	Immune System	True	Macrophage	Immune System	Holstein	Female
SAMEA5262715	Bos taurus	PAIRED	Unknown	Unknown	Unknown	ILLUMINA	Illumina HiSeq 2500	Bone Marrow Macrophage	Macrophage	Immune System	True	Macrophage	Immune System	Holstein	Female
SAMEA5262717	Bos taurus	PAIRED	Unknown	Unknown	Unknown	ILLUMINA	Illumina HiSeq 2500	Macrophage	Macrophage	Immune System	True	Macrophage	Immune System	Holstein	Male
SAMEA5262718	Bos taurus	PAIRED	Unknown	Unknown	Unknown	ILLUMINA	Illumina HiSeq 2500	Macrophage	Macrophage	Immune System	True	Macrophage	Immune System	Holstein	Female
SAMEA5262719	Bos taurus	PAIRED	Unknown	Unknown	Unknown	ILLUMINA	Illumina HiSeq 2500	Bone Marrow Macrophage	Macrophage	Immune System	True	Macrophage	Immune System	Holstein	Male
SAMEA5262722	Bos taurus	PAIRED	Unknown	Unknown	Unknown	ILLUMINA	Illumina HiSeq 2500	Bone Marrow Macrophage	Macrophage	Immune System	True	Macrophage	Immune System	Holstein	Male
SAMEA5262727	Bos taurus	PAIRED	Unknown	Unknown	Unknown	ILLUMINA	Illumina HiSeq 2500	Macrophage	Macrophage	Immune System	True	Macrophage	Immune System	Holstein	Female
SAMEA5262728	Bos taurus	PAIRED	Unknown	Unknown	Unknown	ILLUMINA	Illumina HiSeq 2500	Bone Marrow Macrophage	Macrophage	Immune System	True	Macrophage	Immune System	Holstein	Female
SAMEA5368895	Bos indicus x Bos taurus	PAIRED	Unknown	12.91±8.69 months	Male	ILLUMINA	Illumina HiSeq 3000	Skeletal Muscle	Muscle	Muscular System	True	Muscle	Muscular System	Brahman	Male
SAMEA5368896	Bos indicus x Bos taurus	PAIRED	Unknown	12.91±8.69 months	Male	ILLUMINA	Illumina HiSeq 3000	Skeletal Muscle	Muscle	Muscular System	True	Muscle	Muscular System	Brahman	Male
SAMEA5368897	Bos indicus x Bos taurus	PAIRED	Unknown	12.91±8.69 months	Male	ILLUMINA	Illumina HiSeq 3000	Skeletal Muscle	Muscle	Muscular System	True	Muscle	Muscular System	Nelore	Male
SAMEA5368898	Bos indicus x Bos taurus	PAIRED	Unknown	12.91±8.69 months	Male	ILLUMINA	Illumina HiSeq 3000	Skeletal Muscle	Muscle	Muscular System	True	Muscle	Muscular System	Brahman	Male
SAMEA5368899	Bos indicus x Bos taurus	PAIRED	Unknown	12.91±8.69 months	Male	ILLUMINA	Illumina HiSeq 3000	Skeletal Muscle	Muscle	Muscular System	True	Muscle	Muscular System	Brahman	Male
SAMEA5368900	Bos indicus x Bos taurus	PAIRED	Unknown	12.91±8.69 months	Male	ILLUMINA	Illumina HiSeq 3000	Skeletal Muscle	Muscle	Muscular System	True	Muscle	Muscular System	Brahman	Male
SAMEA5368901	Bos indicus x Bos taurus	PAIRED	Unknown	12.91±8.69 months	Male	ILLUMINA	Illumina HiSeq 3000	Skeletal Muscle	Muscle	Muscular System	True	Muscle	Muscular System	Brangus	Male
SAMEA5368902	Bos indicus x Bos taurus	PAIRED	Unknown	12.91±8.69 months	Male	ILLUMINA	Illumina HiSeq 3000	Skeletal Muscle	Muscle	Muscular System	True	Muscle	Muscular System	Brangus	Male
SAMEA5368903	Bos indicus x Bos taurus	PAIRED	Unknown	12.91±8.69 months	Male	ILLUMINA	Illumina HiSeq 3000	Skeletal Muscle	Muscle	Muscular System	True	Muscle	Muscular System	Brangus	Male
SAMEA5368904	Bos indicus x Bos taurus	PAIRED	Unknown	12.91±8.69 months	Male	ILLUMINA	Illumina HiSeq 3000	Skeletal Muscle	Muscle	Muscular System	True	Muscle	Muscular System	Brangus	Male
SAMEA5368905	Bos indicus x Bos taurus	PAIRED	Unknown	12.91±8.69 months	Male	ILLUMINA	Illumina HiSeq 3000	Skeletal Muscle	Muscle	Muscular System	True	Muscle	Muscular System	Brangus	Male
SAMEA5368906	Bos indicus x Bos taurus	PAIRED	Unknown	12.91±8.69 months	Male	ILLUMINA	Illumina HiSeq 3000	Skeletal Muscle	Muscle	Muscular System	True	Muscle	Muscular System	Brangus	Male
SAMEA5368907	Bos indicus x Bos taurus	PAIRED	Unknown	12.91±8.69 months	Male	ILLUMINA	Illumina HiSeq 3000	Skeletal Muscle	Muscle	Muscular System	True	Muscle	Muscular System	Angus	Male
SAMEA5368908	Bos indicus x Bos taurus	PAIRED	Unknown	12.91±8.69 months	Male	ILLUMINA	Illumina HiSeq 3000	Skeletal Muscle	Muscle	Muscular System	True	Muscle	Muscular System	Angus	Male
SAMEA5368909	Bos indicus x Bos taurus	PAIRED	Unknown	12.91±8.69 months	Male	ILLUMINA	Illumina HiSeq 3000	Skeletal Muscle	Muscle	Muscular System	True	Muscle	Muscular System	Angus	Male
SAMEA5368910	Bos indicus x Bos taurus	PAIRED	Unknown	12.91±8.69 months	Male	ILLUMINA	Illumina HiSeq 3000	Skeletal Muscle	Muscle	Muscular System	True	Muscle	Muscular System	Angus	Male
SAMEA5368911	Bos indicus x Bos taurus	PAIRED	Unknown	12.91±8.69 months	Male	ILLUMINA	Illumina HiSeq 3000	Skeletal Muscle	Muscle	Muscular System	True	Muscle	Muscular System	Brangus	Male
SAMEA5368912	Bos indicus x Bos taurus	PAIRED	Unknown	12.91±8.69 months	Male	ILLUMINA	Illumina HiSeq 3000	Skeletal Muscle	Muscle	Muscular System	True	Muscle	Muscular System	Brangus	Male
SAMEA5368913	Bos indicus x Bos taurus	PAIRED	Unknown	12.91±8.69 months	Male	ILLUMINA	Illumina HiSeq 3000	Skeletal Muscle	Muscle	Muscular System	True	Muscle	Muscular System	Brangus	Male
SAMEA5368914	Bos indicus x Bos taurus	PAIRED	Unknown	12.91±8.69 months	Male	ILLUMINA	Illumina HiSeq 3000	Skeletal Muscle	Muscle	Muscular System	True	Muscle	Muscular System	Angus	Male
SAMEA5368915	Bos indicus x Bos taurus	PAIRED	Unknown	12.91±8.69 months	Male	ILLUMINA	Illumina HiSeq 3000	Skeletal Muscle	Muscle	Muscular System	True	Muscle	Muscular System	Brangus	Male
SAMEA5368916	Bos indicus x Bos taurus	PAIRED	Unknown	12.91±8.69 months	Male	ILLUMINA	Illumina HiSeq 3000	Skeletal Muscle	Muscle	Muscular System	True	Muscle	Muscular System	Brangus	Male
SAMEA5368917	Bos indicus x Bos taurus	PAIRED	Unknown	12.91±8.69 months	Male	ILLUMINA	Illumina HiSeq 3000	Skeletal Muscle	Muscle	Muscular System	True	Muscle	Muscular System	Brangus	Male
SAMEA5368919	Bos indicus x Bos taurus	PAIRED	Unknown	12.91±8.69 months	Male	ILLUMINA	Illumina HiSeq 3000	Skeletal Muscle	Muscle	Muscular System	True	Muscle	Muscular System	Brangus	Male
SAMEA5368920	Bos indicus x Bos taurus	PAIRED	Unknown	12.91±8.69 months	Male	ILLUMINA	Illumina HiSeq 3000	Skeletal Muscle	Muscle	Muscular System	True	Muscle	Muscular System	Brangus	Male
SAMEA5368921	Bos indicus x Bos taurus	PAIRED	Unknown	12.91±8.69 months	Male	ILLUMINA	Illumina HiSeq 3000	Skeletal Muscle	Muscle	Muscular System	True	Muscle	Muscular System	Brahman	Male
SAMEA5368922	Bos indicus x Bos taurus	PAIRED	Unknown	12.91±8.69 months	Male	ILLUMINA	Illumina HiSeq 3000	Skeletal Muscle	Muscle	Muscular System	True	Muscle	Muscular System	Brangus	Male
SAMEA5368923	Bos indicus x Bos taurus	PAIRED	Unknown	12.91±8.69 months	Male	ILLUMINA	Illumina HiSeq 3000	Skeletal Muscle	Muscle	Muscular System	True	Muscle	Muscular System	Angus	Male
SAMEA5368924	Bos indicus x Bos taurus	PAIRED	Unknown	12.91±8.69 months	Male	ILLUMINA	Illumina HiSeq 3000	Skeletal Muscle	Muscle	Muscular System	True	Muscle	Muscular System	Brahman	Male
SAMEA5368925	Bos indicus x Bos taurus	PAIRED	Unknown	12.91±8.69 months	Male	ILLUMINA	Illumina HiSeq 3000	Skeletal Muscle	Muscle	Muscular System	True	Muscle	Muscular System	Brangus	Male
SAMEA5368926	Bos indicus x Bos taurus	PAIRED	Unknown	12.91±8.69 months	Male	ILLUMINA	Illumina HiSeq 3000	Skeletal Muscle	Muscle	Muscular System	True	Muscle	Muscular System	Brahman	Male
SAMEA5368927	Bos indicus x Bos taurus	PAIRED	Unknown	12.91±8.69 months	Male	ILLUMINA	Illumina HiSeq 3000	Skeletal Muscle	Muscle	Muscular System	True	Muscle	Muscular System	Brangus	Male
SAMEA5368928	Bos indicus x Bos taurus	PAIRED	Unknown	12.91±8.69 months	Male	ILLUMINA	Illumina HiSeq 3000	Skeletal Muscle	Muscle	Muscular System	True	Muscle	Muscular System	Angus	Male
SAMEA5368929	Bos indicus x Bos taurus	PAIRED	Unknown	12.91±8.69 months	Male	ILLUMINA	Illumina HiSeq 3000	Skeletal Muscle	Muscle	Muscular System	True	Muscle	Muscular System	Angus	Male
SAMEA5368930	Bos indicus x Bos taurus	PAIRED	Unknown	12.91±8.69 months	Male	ILLUMINA	Illumina HiSeq 3000	Skeletal Muscle	Muscle	Muscular System	True	Muscle	Muscular System	Angus	Male
SAMEA5368931	Bos indicus x Bos taurus	PAIRED	Unknown	12.91±8.69 months	Male	ILLUMINA	Illumina HiSeq 3000	Skeletal Muscle	Muscle	Muscular System	True	Muscle	Muscular System	Brangus	Male
SAMEA5368932	Bos indicus x Bos taurus	PAIRED	Unknown	12.91±8.69 months	Male	ILLUMINA	Illumina HiSeq 3000	Skeletal Muscle	Muscle	Muscular System	True	Muscle	Muscular System	Brangus	Male
SAMEA5368933	Bos indicus x Bos taurus	PAIRED	Unknown	12.91±8.69 months	Male	ILLUMINA	Illumina HiSeq 3000	Skeletal Muscle	Muscle	Muscular System	True	Muscle	Muscular System	Angus	Male
SAMEA5368934	Bos indicus x Bos taurus	PAIRED	Unknown	12.91±8.69 months	Male	ILLUMINA	Illumina HiSeq 3000	Skeletal Muscle	Muscle	Muscular System	True	Muscle	Muscular System	Angus	Male
SAMEA5368935	Bos indicus x Bos taurus	PAIRED	Unknown	12.91±8.69 months	Male	ILLUMINA	Illumina HiSeq 3000	Skeletal Muscle	Muscle	Muscular System	True	Muscle	Muscular System	Angus	Male
SAMEA5368936	Bos indicus x Bos taurus	PAIRED	Unknown	12.91±8.69 months	Male	ILLUMINA	Illumina HiSeq 3000	Skeletal Muscle	Muscle	Muscular System	True	Muscle	Muscular System	Angus	Male
SAMEA5368937	Bos indicus x Bos taurus	PAIRED	Unknown	12.91±8.69 months	Male	ILLUMINA	Illumina HiSeq 3000	Skeletal Muscle	Muscle	Muscular System	True	Muscle	Muscular System	Brangus	Male
SAMEA5368938	Bos indicus x Bos taurus	PAIRED	Unknown	12.91±8.69 months	Male	ILLUMINA	Illumina HiSeq 3000	Skeletal Muscle	Muscle	Muscular System	True	Muscle	Muscular System	Brangus	Male
SAMEA5368939	Bos indicus x Bos taurus	PAIRED	Unknown	12.91±8.69 months	Male	ILLUMINA	Illumina HiSeq 3000	Skeletal Muscle	Muscle	Muscular System	True	Muscle	Muscular System	Angus	Male
SAMEA5368940	Bos indicus x Bos taurus	PAIRED	Unknown	12.91±8.69 months	Male	ILLUMINA	Illumina HiSeq 3000	Skeletal Muscle	Muscle	Muscular System	True	Muscle	Muscular System	Brangus	Male
SAMEA5368941	Bos indicus x Bos taurus	PAIRED	Unknown	12.91±8.69 months	Male	ILLUMINA	Illumina HiSeq 3000	Skeletal Muscle	Muscle	Muscular System	True	Muscle	Muscular System	Brangus	Male
SAMEA5368942	Bos indicus x Bos taurus	PAIRED	Unknown	12.91±8.69 months	Male	ILLUMINA	Illumina HiSeq 3000	Skeletal Muscle	Muscle	Muscular System	True	Muscle	Muscular System	Angus	Male
SAMEA5368943	Bos indicus x Bos taurus	PAIRED	Unknown	12.91±8.69 months	Male	ILLUMINA	Illumina HiSeq 3000	Skeletal Muscle	Muscle	Muscular System	True	Muscle	Muscular System	Brangus	Male
SAMEA5368944	Bos indicus x Bos taurus	PAIRED	Unknown	12.91±8.69 months	Male	ILLUMINA	Illumina HiSeq 3000	Skeletal Muscle	Muscle	Muscular System	True	Muscle	Muscular System	Angus	Male
SAMEA5368945	Bos indicus x Bos taurus	PAIRED	Unknown	12.91±8.69 months	Male	ILLUMINA	Illumina HiSeq 3000	Skeletal Muscle	Muscle	Muscular System	True	Muscle	Muscular System	Brangus	Male
SAMEA5368946	Bos indicus x Bos taurus	PAIRED	Unknown	12.91±8.69 months	Male	ILLUMINA	Illumina HiSeq 3000	Skeletal Muscle	Muscle	Muscular System	True	Muscle	Muscular System	Brangus	Male
SAMEA5368947	Bos indicus x Bos taurus	PAIRED	Unknown	12.91±8.69 months	Male	ILLUMINA	Illumina HiSeq 3000	Skeletal Muscle	Muscle	Muscular System	True	Muscle	Muscular System	Brangus	Male
SAMEA5368948	Bos indicus x Bos taurus	PAIRED	Unknown	12.91±8.69 months	Male	ILLUMINA	Illumina HiSeq 3000	Skeletal Muscle	Muscle	Muscular System	True	Muscle	Muscular System	Brangus	Male
SAMEA5368949	Bos indicus x Bos taurus	PAIRED	Unknown	12.91±8.69 months	Male	ILLUMINA	Illumina HiSeq 3000	Skeletal Muscle	Muscle	Muscular System	True	Muscle	Muscular System	Brangus	Male
SAMEA5368950	Bos indicus x Bos taurus	PAIRED	Unknown	12.91±8.69 months	Male	ILLUMINA	Illumina HiSeq 3000	Skeletal Muscle	Muscle	Muscular System	True	Muscle	Muscular System	Brangus	Male
SAMEA5368951	Bos indicus x Bos taurus	PAIRED	Unknown	12.91±8.69 months	Male	ILLUMINA	Illumina HiSeq 3000	Skeletal Muscle	Muscle	Muscular System	True	Muscle	Muscular System	Brahman	Male
SAMEA5368952	Bos indicus x Bos taurus	PAIRED	Unknown	12.91±8.69 months	Male	ILLUMINA	Illumina HiSeq 3000	Skeletal Muscle	Muscle	Muscular System	True	Muscle	Muscular System	Angus	Male
SAMEA5368953	Bos indicus x Bos taurus	PAIRED	Unknown	12.91±8.69 months	Male	ILLUMINA	Illumina HiSeq 3000	Skeletal Muscle	Muscle	Muscular System	True	Muscle	Muscular System	Brangus	Male
SAMEA5368954	Bos indicus x Bos taurus	PAIRED	Unknown	12.91±8.69 months	Male	ILLUMINA	Illumina HiSeq 3000	Skeletal Muscle	Muscle	Muscular System	True	Muscle	Muscular System	Brangus	Male
SAMEA5368955	Bos indicus x Bos taurus	PAIRED	Unknown	12.91±8.69 months	Male	ILLUMINA	Illumina HiSeq 3000	Skeletal Muscle	Muscle	Muscular System	True	Muscle	Muscular System	Brangus	Male
SAMEA5368956	Bos indicus x Bos taurus	PAIRED	Unknown	12.91±8.69 months	Male	ILLUMINA	Illumina HiSeq 3000	Skeletal Muscle	Muscle	Muscular System	True	Muscle	Muscular System	Brangus	Male
SAMEA5368957	Bos indicus x Bos taurus	PAIRED	Unknown	12.91±8.69 months	Male	ILLUMINA	Illumina HiSeq 3000	Skeletal Muscle	Muscle	Muscular System	True	Muscle	Muscular System	Brangus	Male
SAMEA5368958	Bos indicus x Bos taurus	PAIRED	Unknown	12.91±8.69 months	Male	ILLUMINA	Illumina HiSeq 3000	Skeletal Muscle	Muscle	Muscular System	True	Muscle	Muscular System	Brangus	Male
SAMEA5368959	Bos indicus x Bos taurus	PAIRED	Unknown	12.91±8.69 months	Male	ILLUMINA	Illumina HiSeq 3000	Skeletal Muscle	Muscle	Muscular System	True	Muscle	Muscular System	Brangus	Male
SAMEA5368960	Bos indicus x Bos taurus	PAIRED	Unknown	12.91±8.69 months	Male	ILLUMINA	Illumina HiSeq 3000	Skeletal Muscle	Muscle	Muscular System	Failed	Muscle	Muscular System	Unknown	Male
SAMEA5368961	Bos indicus x Bos taurus	PAIRED	Unknown	12.91±8.69 months	Male	ILLUMINA	Illumina HiSeq 3000	Skeletal Muscle	Muscle	Muscular System	True	Muscle	Muscular System	Brangus	Male
SAMEA5368962	Bos indicus x Bos taurus	PAIRED	Unknown	12.91±8.69 months	Male	ILLUMINA	Illumina HiSeq 3000	Skeletal Muscle	Muscle	Muscular System	True	Muscle	Muscular System	Brangus	Male
SAMEA5368963	Bos indicus x Bos taurus	PAIRED	Unknown	12.91±8.69 months	Male	ILLUMINA	Illumina HiSeq 3000	Skeletal Muscle	Muscle	Muscular System	True	Muscle	Muscular System	Brahman	Male
SAMEA5368964	Bos indicus x Bos taurus	PAIRED	Unknown	12.91±8.69 months	Male	ILLUMINA	Illumina HiSeq 3000	Skeletal Muscle	Muscle	Muscular System	True	Muscle	Muscular System	Brangus	Male
SAMEA5368965	Bos indicus x Bos taurus	PAIRED	Unknown	12.91±8.69 months	Male	ILLUMINA	Illumina HiSeq 3000	Skeletal Muscle	Muscle	Muscular System	True	Muscle	Muscular System	Angus	Male
SAMEA5368966	Bos indicus x Bos taurus	PAIRED	Unknown	12.91±8.69 months	Male	ILLUMINA	Illumina HiSeq 3000	Skeletal Muscle	Muscle	Muscular System	True	Muscle	Muscular System	Brahman	Male
SAMEA5368967	Bos indicus x Bos taurus	PAIRED	Unknown	12.91±8.69 months	Male	ILLUMINA	Illumina HiSeq 3000	Skeletal Muscle	Muscle	Muscular System	True	Muscle	Muscular System	Brangus	Male
SAMEA5368968	Bos indicus x Bos taurus	PAIRED	Unknown	12.91±8.69 months	Male	ILLUMINA	Illumina HiSeq 3000	Skeletal Muscle	Muscle	Muscular System	True	Muscle	Muscular System	Brangus	Male
SAMEA5368969	Bos indicus x Bos taurus	PAIRED	Unknown	12.91±8.69 months	Male	ILLUMINA	Illumina HiSeq 3000	Skeletal Muscle	Muscle	Muscular System	True	Muscle	Muscular System	Brangus	Male
SAMEA5368970	Bos indicus x Bos taurus	PAIRED	Unknown	12.91±8.69 months	Male	ILLUMINA	Illumina HiSeq 3000	Skeletal Muscle	Muscle	Muscular System	True	Muscle	Muscular System	Brahman	Male
SAMEA5368971	Bos indicus x Bos taurus	PAIRED	Unknown	12.91±8.69 months	Male	ILLUMINA	Illumina HiSeq 3000	Skeletal Muscle	Muscle	Muscular System	True	Muscle	Muscular System	Brangus	Male
SAMEA5368972	Bos indicus x Bos taurus	PAIRED	Unknown	12.91±8.69 months	Male	ILLUMINA	Illumina HiSeq 3000	Skeletal Muscle	Muscle	Muscular System	True	Muscle	Muscular System	Brangus	Male
SAMEA5368973	Bos indicus x Bos taurus	PAIRED	Unknown	12.91±8.69 months	Male	ILLUMINA	Illumina HiSeq 3000	Skeletal Muscle	Muscle	Muscular System	True	Muscle	Muscular System	Brangus	Male
SAMEA5368974	Bos indicus x Bos taurus	PAIRED	Unknown	12.91±8.69 months	Male	ILLUMINA	Illumina HiSeq 3000	Skeletal Muscle	Muscle	Muscular System	True	Muscle	Muscular System	Brangus	Male
[truncated: 25,832 more rows]

## Sheet: Supplementary_Table_3
Supplementary Table 3. Metadata of 3,530 WGS samples
Sample ID	Breeds	Mapping rates
1	Xuzhou	0.9974
2	Xuzhou	0.9983
3	Xuzhou	0.9983
4	Xuzhou	0.9981
[truncated: 3,526 more rows]

## Sheet: Supplementary_Table_4
Supplementary Table 4. Mapping quality of 27,681 RNA-seq samples
[truncated: 27,682 more rows]

[truncated: 16 more sheets: Supplementary_Table_5, Supplementary_Table_6, Supplementary_Table_7, Supplementary_Table_8, Supplementary_Table_9, Supplementary_Table_10, Supplementary_Table_11, Supplementary_Table_12, Supplementary_Table_13, Supplementary_Table_14, Supplementary_Table_15, Supplementary_Table_16, Supplementary_Table_17, Supplementary_Table_18, Supplementary_Table_19, Supplementary_Table_20]
